# Supplementary material for: Loss of Dnmt3a and Dnmt3b does not affect epidermal homeostasis but promotes squamous transformation through PPAR-γ
Source: eLife journal article supplement (doi:10.7554/elife.21697), 2017-04-20
Supplement: supp [file elife-21697-supp-v1.zip]

Archive with 23 entries (23 files):
- elife_poa_e21697_Figure_3_Supplement_4.pdf
- elife_poa_e21697_Figure_3_Supplement_4_Source_Data_File.xlsx
- elife_poa_e21697_Figure_2_Supplement_3.pdf
- elife_poa_e21697_Supplementary_File_3.xlsb
- elife_poa_e21697_Figure_7_Supplement_1_Source_Data_File.xlsx
- elife_poa_e21697_Figure_7_Supplement_1.pdf
- elife_poa_e21697_Supplementary_File1.xlsx
- elife_poa_e21697_Figure_2_Supplement_6.pdf
- elife_poa_e21697_Figure_2_Supplement_1.pdf
- elife_poa_e21697_Figure_6_Source_Data_File.xlsx
- elife_poa_e21697_Figure_2_Supplement_2.pdf
- elife_poa_e21697_Figure_7_Source_Data_File.xlsx
- elife_poa_e21697_Supplementary_File_2.xlsx
- elife_poa_e21697_Figure_3_Supplement_2.pdf
- elife_poa_e21697_Figure_3_Supplement_3.pdf
- elife_poa_e21697_Figure_4_Supplement_1.pdf
- elife_poa_e21697_Figure_1_Source_Data_File.xlsx
- elife_poa_e21697_Figure_5_Supplement_1.pdf
- elife_poa_e21697_Figure_2_Supplement_5.pdf
- elife_poa_e21697_Figure_3_Supplement_1.pdf
- elife_poa_e21697_Figure_3_Supplement_4_Source_Data_FileSource_Data_File.xlsx
- elife_poa_e21697_Figure_Supplement_1.pdf
- elife_poa_e21697_Figure_2_Supplement_4.pdf
