# Supplementary material for: Loss of Dnmt3a and Dnmt3b does not affect epidermal homeostasis but promotes squamous transformation through PPAR-γ
Source: eLife journal article supplement (doi:10.7554/elife.21697), 2017-04-20
Supplement: supp [file elife-21697-supp-v1.zip › elife_poa_e21697_Figure_1_Source_Data_File.xlsx]

## Sheet: Sheet1
FREE TUMOR SURVIVAL DATA: Figure 1B							TUMORS COUNTING DATA: Figure 1C
							After 3months of treatment			After 6months of treatment
Days from the first treatment	WT	Dnmt3A-cKO					WT	Dnmt3a cKO		WT	Dnmt3a cKO
82	1						1	2		0	15
103	1						1	6		7	14
138	1						2	3		4	15
101	1						0	7		1	28
94	1						1	12		3	19
94	1						2	5		3	16
85		1						8			15
85		1						6			11
82		1
64		1
68		1
85		1
78		1
