# Supplementary material for: Loss of Dnmt3a and Dnmt3b does not affect epidermal homeostasis but promotes squamous transformation through PPAR-γ
Source: eLife journal article supplement (doi:10.7554/elife.21697), 2017-04-20
Supplement: supp [file elife-21697-supp-v1.zip › elife_poa_e21697_Figure_3_Supplement_4_Source_Data_File.xlsx]

## Sheet: Sheet1
PERCENTAGE OF APOPTOTIC CELLS in SCC or CARCINOMAS in SITU
				CASPASE-3 positive cells / DAPI positive cells
STAINING for CASPASE-3			Wild Type						Dnmt3a cKO
			0.262	0.378235	0.473125	0.363333	0.40125	0.245	0.155909	0.156818	0.053	0.152778	0.172105	0.121111
				TUNEL positive cells / DAPI positive cells
TUNEL STAINING
		WILD TYPE																	Dnmt3a cKO
		0.4875	0.27625	0.14	0.07	0.373529	0.107647	0.0613636	0.0261538	0.286923	0.515333	0.035	0.0388889						0.0630435	0.119048	0.135652	0.076	0.0675	0.0511111	0.131177	0.0195455	0.144445	0.0728	0.0225	0.273333	0.209524	0.0172727	0.0995	0.0926087	0.0366667
