# Supplementary material for: Loss of Dnmt3a and Dnmt3b does not affect epidermal homeostasis but promotes squamous transformation through PPAR-γ
Source: eLife journal article supplement (doi:10.7554/elife.21697), 2017-04-20
Supplement: supp [file elife-21697-supp-v1.zip › elife_poa_e21697_Figure_3_Supplement_4_Source_Data_FileSource_Data_File.xlsx]

## Sheet: Sheet1
Percentage of KI67 positive cells / All Nuclei
Data obtained with T-Marker Software
		Untreated Epidermis		Precancerous Epidermis		SCC or Carcinomas in Situ
		WT	Dnmt3a cKO	WT	Dnmt3a cKO	WT	Dnmt3a cKO
		0.41	0.3	0.62	0.83	0.52	0.32
		0.27	0.32	0.59	0.74	0.41	0.25
		0.28	0.22	0.5	0.66	0.42	0.25
		0.3	0.39	0.43	0.63	0.78	0.74
						0.71	0.58
						0.72	0.23
						0.79	0.66
						0.67	0.71
						0.65	0.7
							0.81
							0.82
							0.79
							0.84
							0.75
