# Supplementary material for: Loss of Dnmt3a and Dnmt3b does not affect epidermal homeostasis but promotes squamous transformation through PPAR-γ
Source: eLife journal article supplement (doi:10.7554/elife.21697), 2017-04-20
Supplement: supp [file elife-21697-supp-v1.zip › elife_poa_e21697_Figure_6_Source_Data_File.xlsx]

## Sheet: Sheet1
CPM values of mRNA of PPARG
		PRECANCEROUS EPIDERMIS			SCC tumors
		WT	Dnmt3a cKO		WT	Dnmt3a cKO
		1.20973	1.65266		1.44171	10.6521
		1.40507	3.06985		0.38606	6.13288
		2.00901	8.85128		2.32125	19.6934
		1.09124	3.09632		4.46143	17.0668
						11.5747
						24.0711
						85.1804
						34.1812
