# Supplementary material for: Loss of Dnmt3a and Dnmt3b does not affect epidermal homeostasis but promotes squamous transformation through PPAR-γ
Source: eLife journal article supplement (doi:10.7554/elife.21697), 2017-04-20
Supplement: supp [file elife-21697-supp-v1.zip › elife_poa_e21697_Figure_7_Source_Data_File.xlsx]

## Sheet: Sheet1
Inhibitor PPARG experiment : Figure 7
	Number of tumors por mouse after 120 days from first DMBA treatment
WT Vehicle										Dnmt3a-cKO vehicle										WT + GW9662										KO + GW9662
1	1	0								5	3	3								0	0	0	0	2						1	1	0	1	0	1	3
