# Supplementary material for: Loss of Dnmt3a and Dnmt3b does not affect epidermal homeostasis but promotes squamous transformation through PPAR-γ
Source: eLife journal article supplement (doi:10.7554/elife.21697), 2017-04-20
Supplement: supp [file elife-21697-supp-v1.zip › elife_poa_e21697_Figure_7_Supplement_1_Source_Data_File.xlsx]

## Sheet: Sheet1
DATA obtained from published data from human patients using the online platform GEO2R:
	https://www.ncbi.nlm.nih.gov/geo/geo2r/
	GSE53462 data
	Normal Epidermis														SCC
Dnmt3a expression	5.65781	5.56841	5.45097	5.56121	5.60886										5.55572	5.57614	5.39451	5.51795	5.45577	5.52961	5.60138	5.58551	5.44438	5.4285	5.5395	5.38498	5.53637	5.47404
	GSE45164 data
	Normal skin										SCC
Dnmt3a expression	5.98185	5.68378	6.47214								5.65197	5.41637	5.37777	5.72073	6.11947	5.61817	5.6415	5.80877	5.72153	5.62996
	GSE2503 data
	Normal Epidermis						actinic keratoses						SCC
Dnmt3a expression	97.5	398.7	541.9	376.5	214.2	424.9	55.4	61.4	734.1	88.8			437.4	42.8	78.4	123.3	27.2
	GSE42677 data
	Normal Epidermis										Actinic keratoses										SCC
Dnmt3a expression	4.86567	4.37554	4.57876	5.28637	6.16432	5.08753	4.42346	5.0716	5.13396	5.05832	3.4544	4.67284	4.22065	3.99103	3.99513						3.72862	4.62898	3.86268	5.36814	3.93747	4.55081	3.96853	4.44063	3.81242	4.32482
