# Supplementary material for: Loss of Dnmt3a and Dnmt3b does not affect epidermal homeostasis but promotes squamous transformation through PPAR-γ
Source: eLife journal article supplement (doi:10.7554/elife.21697), 2017-04-20
Supplement: supp [file elife-21697-supp-v1.zip › elife_poa_e21697_Supplementary_File1.xlsx]

## Sheet: Sheet1
Differential Expression Transcripts of Sorted ITGA6+ cells from Skin Tumors in Wild Type (n=4) and Dnmt3a cKO (n=8)
Negative values means these genes are higher in the Dnmt3a cKO cells
	baseMean	log2FoldChange	lfcSE	stat	pvalue	padj		statisticallly different
BC026585	120.247	-2.59127	0.29294	-8.84571	9.09471e-19	1.25889e-14		YES
Cntn1	456.012	3.31849	0.464638	7.1421	9.19175e-13	4.24107e-09		YES
H19	8218.5	-3.19586	0.444879	-7.18366	6.78705e-13	4.24107e-09		YES
Krt7	281.901	-2.90271	0.420358	-6.90532	5.00897e-12	1.73335e-08		YES
Clstn3	495.362	-2.66366	0.394278	-6.7558	1.42052e-11	3.93257e-08		YES
Ppara	178.531	-2.31179	0.351735	-6.57254	4.9463e-11	1.14111e-07		YES
Tln2	905.786	-1.16931	0.181193	-6.45341	1.09361e-10	2.16254e-07		YES
Vnn3	58.4121	-2.32139	0.361188	-6.4271	1.30063e-10	2.25041e-07		YES
Btbd3	1603.19	1.14183	0.184317	6.1949	5.83205e-10	8.96969e-07		YES
Aldh3a1	2501.84	-1.82573	0.301454	-6.05643	1.39179e-09	1.92652e-06		YES
Cbr2	2605.16	1.17941	0.198552	5.94006	2.84917e-09	3.23866e-06		YES
Nsg1	205.293	-1.93747	0.326759	-5.92933	3.04165e-09	3.23866e-06		YES
Snora62	186.95	1.63698	0.275111	5.95027	2.67703e-09	3.23866e-06		YES
Klk5	39.635	-1.96855	0.33558	-5.86612	4.46122e-09	4.41087e-06		YES
Rassf3	331.392	-1.67762	0.288934	-5.80625	6.38868e-09	5.89547e-06		YES
Galnt14	89.6062	-2.29155	0.39882	-5.74582	9.1477e-09	7.53075e-06		YES
Msrb3	767.397	-1.73938	0.303331	-5.73428	9.79291e-09	7.53075e-06		YES
Sntb1	284.531	-2.08292	0.362801	-5.74121	9.40019e-09	7.53075e-06		YES
Igfbp5	229.317	-2.06067	0.363963	-5.66175	1.4984e-08	1.09163e-05		YES
Amdhd1	87.0255	2.35355	0.421205	5.58766	2.30151e-08	1.38511e-05		YES
Lincrna-cox2	24.3471	2.19439	0.391917	5.59911	2.15455e-08	1.38511e-05		YES
Lpl	423.074	-1.85505	0.33155	-5.59507	2.20529e-08	1.38511e-05		YES
Npr2	83.7208	-1.8576	0.331319	-5.6067	2.06223e-08	1.38511e-05		YES
Tgm2	389.031	-1.73422	0.312066	-5.55722	2.74106e-08	1.5809e-05		YES
Khdrbs3	154.805	-2.28845	0.412738	-5.54455	2.94704e-08	1.63172e-05		YES
Gas7	586.895	-1.55381	0.280742	-5.53464	3.11871e-08	1.66036e-05		YES
Skap2	1040.61	2.26613	0.410792	5.5165	3.45827e-08	1.77294e-05		YES
Creld1	124.28	-1.576	0.288707	-5.45882	4.79301e-08	2.34691e-05		YES
Pdlim4	285.302	-1.93929	0.355553	-5.45429	4.91694e-08	2.34691e-05		YES
Cartpt	49.9205	2.76599	0.508351	5.4411	5.29533e-08	2.44327e-05		YES
Ube2ql1	87.2773	2.69249	0.496647	5.42134	5.91534e-08	2.6413e-05		YES
Adh7	2681.47	-1.89145	0.350026	-5.40374	6.52657e-08	2.80553e-05		YES
Krt79	9819.08	-2.2671	0.419885	-5.39934	6.68851e-08	2.80553e-05		YES
Fut1	124.574	-1.90141	0.352828	-5.38905	7.08308e-08	2.88365e-05		YES
Dtx4	163.208	-1.5853	0.29469	-5.37954	7.46775e-08	2.95339e-05		YES
Fbln7	160.921	-2.06475	0.385984	-5.34931	8.82911e-08	3.39479e-05		YES
Klk7	2563.03	-2.18484	0.423041	-5.16461	2.40938e-07	9.01367e-05		YES
Armcx4	94.5056	-1.92256	0.37273	-5.15807	2.49512e-07	9.08882e-05		YES
Aim2	546.357	1.64097	0.319464	5.13662	2.7973e-07	9.92826e-05		YES
Fbn2	302.416	-2.14895	0.419096	-5.12759	2.93477e-07	0.000101558		YES
Arhgef40	504.239	-1.61132	0.31491	-5.11677	3.10817e-07	0.000102436		YES
Ces2g	2194.02	1.7544	0.342569	5.12131	3.0342e-07	0.000102436		YES
Clmp	170.179	-1.66608	0.32753	-5.08681	3.64141e-07	0.00011722		YES
Abhd12b	97.9477	-1.81414	0.359015	-5.05311	4.34674e-07	0.000136744		YES
Cidea	481.856	-2.05819	0.407802	-5.04703	4.48727e-07	0.000138028		YES
Trerf1	192.093	1.10261	0.218744	5.04066	4.63923e-07	0.0001396		YES
Faah	238.068	-1.65439	0.329141	-5.0264	4.99765e-07	0.000147186		YES
Acot5	194.517	-2.01872	0.403644	-5.00123	5.69667e-07	0.000164278		YES
Csta1	4408.93	2.19356	0.441798	4.96507	6.86776e-07	0.000194007		YES
Pparg	594.937	-2.37939	0.479743	-4.95972	7.05959e-07	0.000195438		YES
Rgcc	1258.55	-1.27101	0.257957	-4.92722	8.34067e-07	0.000222022		YES
Thbs2	3907.34	1.70006	0.344868	4.9296	8.23972e-07	0.000222022		YES
Rdh9	167.157	-2.17275	0.441845	-4.91745	8.76767e-07	0.000228985		YES
Fzd3	617.548	-1.5342	0.313462	-4.89436	9.86252e-07	0.000252809		YES
Dlx2	48.5662	-1.42703	0.292812	-4.87354	1.09615e-06	0.000272392		YES
Nudt17	238.125	-1.899	0.39002	-4.86899	1.12168e-06	0.000272392		YES
Prdm8	40.827	1.93789	0.397787	4.87167	1.10661e-06	0.000272392		YES
Lcn2	572.777	-1.8386	0.377983	-4.86424	1.14896e-06	0.000274204		YES
Bex1	110.211	-2.21047	0.4581	-4.8253	1.3979e-06	0.000327962		YES
Akr1c19	71.0055	-2.3325	0.488047	-4.77925	1.75949e-06	0.000389882		YES
Cst6	4302.64	-2.38403	0.498467	-4.78272	1.72937e-06	0.000389882		YES
Gsta3	189.378	-1.94703	0.407539	-4.77754	1.7745e-06	0.000389882		YES
Mgmt	363.461	1.66966	0.349322	4.77971	1.75548e-06	0.000389882		YES
Lphn2	1545.29	-1.26098	0.26434	-4.7703	1.83956e-06	0.000397862		YES
Emid1	75.1537	-1.62212	0.342023	-4.74273	2.10862e-06	0.000438338		YES
Hand1	351.824	-2.3247	0.49029	-4.74147	2.12171e-06	0.000438338		YES
Tagln	330.538	-1.62435	0.342392	-4.74412	2.09411e-06	0.000438338		YES
Ankrd6	152.423	-1.65019	0.348352	-4.73715	2.16743e-06	0.000441199		YES
Gm5088	83.3338	1.22817	0.260044	4.72294	2.32456e-06	0.000460563		YES
Tfap2b	207.497	-1.73846	0.36812	-4.72255	2.3291e-06	0.000460563		YES
Arxes2	25.8309	-2.09927	0.445248	-4.71484	2.41898e-06	0.000471599		YES
Cgnl1	521.084	-1.69582	0.360698	-4.70148	2.5828e-06	0.000496544		YES
Rnu12	1885.03	1.3802	0.294384	4.68844	2.75301e-06	0.000522016		YES
Slit1	499.839	1.67237	0.357322	4.68028	2.86487e-06	0.000535886		YES
Snora68	446.408	1.28732	0.276221	4.66046	3.15503e-06	0.000582292		YES
Snora78	1041.33	1.20388	0.25904	4.64747	3.36025e-06	0.000612007		YES
Tmem56	284.952	-1.93731	0.418163	-4.63291	3.60565e-06	0.000648174		YES
Dcxr	1119.29	1.46185	0.316875	4.61334	3.96257e-06	0.000703204		YES
Sema3e	829.313	-1.74352	0.378615	-4.60499	4.12483e-06	0.000722733		YES
Crip2	3496.1	-0.88867	0.194241	-4.57508	4.76027e-06	0.000823645		YES
Akr1c18	1504.7	-2.18216	0.477369	-4.57122	4.84886e-06	0.000828617		YES
Rac3	540.286	0.873553	0.192375	4.54089	5.60164e-06	0.000945584		YES
Sptlc3	555.234	-2.11069	0.466153	-4.52788	5.95788e-06	0.000993602		YES
Fgf1	163.984	-1.89387	0.419261	-4.51717	6.2671e-06	0.00103273		YES
Adamts18	127.503	-2.22255	0.495927	-4.4816	7.40846e-06	0.00117871		YES
B4galt4	44.583	-1.36905	0.305376	-4.48315	7.3549e-06	0.00117871		YES
Gspt2	33.932	-1.7014	0.379246	-4.48627	7.24812e-06	0.00117871		YES
Nr1h3	74.1066	-1.27483	0.285348	-4.46761	7.90979e-06	0.00124417		YES
Tbkbp1	81.8525	-1.28627	0.288192	-4.46326	8.07233e-06	0.00125547		YES
Dmrta2	100.373	2.02692	0.455359	4.45125	8.53728e-06	0.00131303		YES
Dram1	925.144	1.12124	0.252034	4.44876	8.63656e-06	0.00131371		YES
Rdh1	162.11	-1.95614	0.440786	-4.43784	9.08642e-06	0.00136711		YES
Far2	680.812	-1.73349	0.391059	-4.43281	9.30132e-06	0.0013844		YES
Clec11a	238.304	-1.51467	0.342086	-4.42775	9.52199e-06	0.00140216		YES
Ltbp2	396.163	-1.84345	0.416767	-4.42321	9.72444e-06	0.0014169		YES
Olfml2a	123.672	-1.27323	0.28835	-4.41555	1.00752e-05	0.00145271		YES
Pcdhb13	60.584	1.30987	0.297258	4.40649	1.05058e-05	0.00149919		YES
Klk6	1218.59	-2.21506	0.503364	-4.40052	1.07991e-05	0.00152531		YES
H2afy2	198.477	-1.48934	0.339338	-4.38897	1.13888e-05	0.00158411		YES
Slc16a7	100.99	-1.62192	0.369634	-4.38791	1.14443e-05	0.00158411		YES
9130008F23Rik	514.759	0.835446	0.190562	4.38412	1.16457e-05	0.00159603		YES
C1s1	2403.48	1.53811	0.351585	4.37477	1.21558e-05	0.00162041		YES
Calml3	6843.61	-1.96355	0.448972	-4.37342	1.22314e-05	0.00162041		YES
Golga7b	42.6906	-1.80537	0.412859	-4.37285	1.22635e-05	0.00162041		YES
Snord49a	129.895	1.24567	0.284897	4.37235	1.22918e-05	0.00162041		YES
Apcdd1	646.363	-1.28316	0.2954	-4.3438	1.40037e-05	0.00182638		YES
Psd2	147.413	-2.19878	0.506636	-4.33997	1.425e-05	0.00182638		YES
Stfa2	104.138	2.24736	0.517652	4.34145	1.41545e-05	0.00182638		YES
Nbl1	1174	-1.12279	0.258897	-4.33682	1.44556e-05	0.00183572		YES
Mgst1	4016.93	-1.44685	0.33438	-4.32695	1.51188e-05	0.0019025		YES
Mark1	223.283	-1.45494	0.338337	-4.30026	1.70597e-05	0.0021274		YES
Hsf4	42.115	1.1242	0.261893	4.29259	1.76605e-05	0.00218265		YES
Drc1	37.1587	-1.74199	0.406465	-4.2857	1.82165e-05	0.00223144		YES
Snord83b	229.05	1.27377	0.297359	4.28361	1.83884e-05	0.00223274		YES
Ano9	1134.57	-1.35341	0.316764	-4.2726	1.93207e-05	0.00230549		YES
Awat2	158.49	-2.02726	0.474369	-4.2736	1.92346e-05	0.00230549		YES
Slc15a1	172.448	-1.67024	0.391991	-4.26092	2.03589e-05	0.00240862		YES
Rpl31-ps12	202.962	1.32459	0.311199	4.25642	2.07729e-05	0.00241648		YES
Syn2	90.0696	-1.88975	0.443978	-4.2564	2.07746e-05	0.00241648		YES
Cd36	397.114	-1.66441	0.392047	-4.24543	2.18177e-05	0.00251668		YES
Arhgap44	367.177	-1.44052	0.339616	-4.24162	2.21909e-05	0.00253857		YES
Gm12070	1367.15	1.50865	0.359829	4.19268	2.75673e-05	0.00312776		YES
Podxl2	64.0131	-1.69062	0.404273	-4.18188	2.89111e-05	0.00325356		YES
Snord49b	80.0121	1.14872	0.275261	4.17318	3.00372e-05	0.00335302		YES
Ephx2	587.14	-1.66084	0.39827	-4.17014	3.04409e-05	0.0033577		YES
Gm13826	359.59	1.3664	0.327735	4.16922	3.05642e-05	0.0033577		YES
Adig	46.6358	-1.63509	0.392642	-4.16432	3.12284e-05	0.00337829		YES
Timp2	515.902	-0.916323	0.220046	-4.16424	3.12398e-05	0.00337829		YES
Klhl23	287.793	-1.34747	0.324139	-4.15709	3.22331e-05	0.00345868		YES
Cidec	58.358	-2.01854	0.486809	-4.14647	3.37634e-05	0.00357325		YES
Nol3	70.92	1.02209	0.246519	4.14611	3.38171e-05	0.00357325		YES
Igfbp2	4166.99	-1.55978	0.378901	-4.1166	3.84511e-05	0.00403212		YES
Stom	13907.3	1.11521	0.271434	4.10859	3.98082e-05	0.00414305		YES
Gpc3	76.7542	-1.46705	0.35752	-4.10339	4.07141e-05	0.0042057		YES
Myl9	232.035	-1.61444	0.393671	-4.101	4.11377e-05	0.00421799		YES
Erich3	25.0046	-1.72638	0.422462	-4.08646	4.37996e-05	0.0044579		YES
Kifc3	1256.59	-1.40611	0.344274	-4.08429	4.42114e-05	0.00446696		YES
Acot1	800.707	-1.68145	0.412164	-4.07958	4.5118e-05	0.00452553		YES
Pcbd1	60.7725	-1.46846	0.360646	-4.07174	4.66627e-05	0.0046468		YES
Serpina3b	79.2059	-1.67336	0.411325	-4.06822	4.73742e-05	0.00468395		YES
Rab11fip4	186.022	-1.24159	0.305887	-4.059	4.92828e-05	0.0048381		YES
Synm	72.3248	-1.08879	0.268468	-4.05559	5.00086e-05	0.00487478		YES
Aldh1a7	96.6389	-1.93243	0.477655	-4.04566	5.2176e-05	0.00501542		YES
Snora52	174.225	0.896173	0.221511	4.04573	5.21609e-05	0.00501542		YES
Ubl4	243.842	-0.566589	0.14042	-4.03497	5.46104e-05	0.00521322		YES
Cers4	2422.16	-1.64694	0.408406	-4.03261	5.51617e-05	0.00522978		YES
Aadacl3	169.057	-1.74516	0.433284	-4.02775	5.63128e-05	0.00527045		YES
Sdr16c6	686.719	-1.98366	0.492518	-4.02759	5.63521e-05	0.00527045		YES
Atp9a	3607.89	0.582295	0.145018	4.01533	5.93638e-05	0.00549147		YES
Serpina3j	136.152	-1.98442	0.494283	-4.01475	5.95088e-05	0.00549147		YES
Snora44	301.11	1.23686	0.308292	4.01198	6.02117e-05	0.00551954		YES
Mdfic	430.431	-0.816838	0.203812	-4.00781	6.12852e-05	0.00558099		YES
Lifr	2321.41	-1.49007	0.372429	-4.00095	6.3088e-05	0.00566547		YES
Panx3	27.5673	-1.66412	0.416069	-3.99963	6.34408e-05	0.00566547		YES
Sox21	1103.03	1.43334	0.358358	3.99974	6.34125e-05	0.00566547		YES
Higd2a	771.059	0.716573	0.179507	3.99189	6.55483e-05	0.00581615		YES
Hey1	43.0914	-1.09223	0.27389	-3.98784	6.66772e-05	0.00584143		YES
Pcdhb12	61.4609	1.4421	0.36149	3.98931	6.62668e-05	0.00584143		YES
Fbp1	59.0544	-1.65682	0.415875	-3.98393	6.77856e-05	0.00590119		YES
Cpsf4l	58.0189	-0.919942	0.231084	-3.98098	6.86306e-05	0.00593741		YES
Ermp1	3676.27	-0.91081	0.229183	-3.97416	7.06286e-05	0.00606867		YES
Snora3	397.431	1.06928	0.269148	3.97283	7.10247e-05	0.00606867		YES
Atp6v1c2	214.193	-1.5166	0.382283	-3.96721	7.27181e-05	0.00615846		YES
Zfp704	571.206	-1.26966	0.320104	-3.9664	7.29655e-05	0.00615846		YES
Gpd1	225.983	-1.96637	0.497867	-3.9496	7.82835e-05	0.00656727		YES
Prelp	33.5119	-1.35387	0.343262	-3.94414	8.00871e-05	0.00667811		YES
Bhlhb9	408.703	-1.37529	0.349099	-3.93955	8.16331e-05	0.00676626		YES
Tnfrsf11a	102.049	-1.00815	0.256066	-3.93706	8.24845e-05	0.00679613		YES
Kcne4	87.3902	-1.77998	0.453176	-3.92779	8.57292e-05	0.00702167		YES
Gm10653	114.771	1.24216	0.316461	3.92515	8.66761e-05	0.00704297		YES
Gm6251	213.107	1.36267	0.347982	3.91592	9.00596e-05	0.00704297		YES
Icam5	74.1427	0.989174	0.2525	3.91752	8.9465e-05	0.00704297		YES
Kctd17	159.282	-0.911682	0.232762	-3.9168	8.97334e-05	0.00704297		YES
Lgr4	2716.84	-0.873395	0.222697	-3.9219	8.78524e-05	0.00704297		YES
Pard3b	79.4688	-1.51438	0.386605	-3.91712	8.9612e-05	0.00704297		YES
Pdk4	2001.86	-1.9443	0.496005	-3.91992	8.85777e-05	0.00704297		YES
Vkorc1l1	1210.13	-0.44452	0.113282	-3.92401	8.70871e-05	0.00704297		YES
Bche	110.504	-1.757	0.448974	-3.91337	9.10176e-05	0.00707789		YES
Fbxw9	1067.72	1.21015	0.309882	3.90521	9.41432e-05	0.00728005		YES
Acox2	92.9872	-1.73581	0.445026	-3.90047	9.60066e-05	0.00729323		YES
C1ra	362.91	1.46218	0.374973	3.89943	9.64212e-05	0.00729323		YES
Rasef	66.9898	-1.68537	0.431986	-3.90144	9.56218e-05	0.00729323		YES
Wnt6	183.427	-1.29962	0.333005	-3.9027	9.51267e-05	0.00729323		YES
Itgb8	658.998	-1.16719	0.299554	-3.89645	9.76136e-05	0.00730361		YES
Me1	692.824	-1.40718	0.361057	-3.89739	9.72353e-05	0.00730361		YES
Batf	84.2224	-1.486	0.382377	-3.88621	0.000101822	0.00757306		YES
Stbd1	217.792	-0.625204	0.160926	-3.88505	0.000102309	0.00757306		YES
Avpr1a	214.599	-1.68892	0.436256	-3.87141	0.00010821	0.00793449		YES
Cspg4	1069.75	-1.53229	0.395828	-3.87112	0.000108338	0.00793449		YES
Abhd15	70.1529	-1.349	0.348625	-3.86948	0.000109069	0.00794596		YES
Orm1	318.386	-1.53376	0.397112	-3.86228	0.000112332	0.00809854		YES
Rnmtl1	441.507	-0.643102	0.166561	-3.86105	0.000112899	0.00809854		YES
Stfa1	8018.35	1.95437	0.50618	3.86101	0.000112919	0.00809854		YES
Enpp5	41.4061	-1.40763	0.364972	-3.85681	0.000114875	0.00819643		YES
Zfp423	77.5091	-1.77817	0.46197	-3.84909	0.000118555	0.0084156		YES
Ehd3	562.756	-1.61743	0.420423	-3.84715	0.0001195	0.0084293		YES
Fzd1	1997.96	-1.1242	0.292383	-3.84495	0.000120575	0.0084293		YES
Impact	969.995	1.05543	0.27444	3.84576	0.000120177	0.0084293		YES
BC018473	74.9133	1.25544	0.327203	3.83689	0.0001246	0.00866689		YES
Hal	321.262	1.72239	0.450468	3.82356	0.000131536	0.00910363		YES
Adh1	149.382	-1.72341	0.451185	-3.81974	0.000133592	0.00919987		YES
Rap2a	1162.26	0.845729	0.221661	3.81541	0.000135954	0.00931623		YES
Misp	29.9153	-1.73628	0.455808	-3.80924	0.000139393	0.0095048		YES
Pura	472.05	0.640312	0.168235	3.80606	0.000141196	0.00958058		YES
Enpp4	42.2101	-1.18862	0.312685	-3.80134	0.000143917	0.00971759		YES
Ppp1r36	23.5644	-1.50628	0.397559	-3.78882	0.000151366	0.0101709		YES
Acacb	307.411	-1.34188	0.354308	-3.78732	0.000152282	0.010183		YES
Gm3219	45.5	1.01472	0.268372	3.78105	0.000156171	0.0103458		YES
Gria3	110.671	1.77632	0.469804	3.78098	0.000156212	0.0103458		YES
Aoah	22.5936	1.71436	0.454005	3.77609	0.000159309	0.0105007		YES
Phyhip	351.092	-1.50205	0.398294	-3.77121	0.000162455	0.0106071		YES
Unc119	232.51	-0.901519	0.239024	-3.77167	0.000162158	0.0106071		YES
Abcb1b	1663.73	0.989734	0.262872	3.76507	0.000166499	0.0106809		YES
Cand2	146.019	-0.773378	0.205348	-3.76618	0.000165767	0.0106809		YES
Cmtm8	58.9149	-1.48053	0.393255	-3.76481	0.000166672	0.0106809		YES
Ugt1a1	194.967	-1.53081	0.406608	-3.76484	0.000166659	0.0106809		YES
Fmo2	24.7604	-1.7906	0.476163	-3.76049	0.000169583	0.0107951		YES
Sfmbt2	57.5664	-1.64131	0.436536	-3.75985	0.000170013	0.0107951		YES
Sdpr	382.437	-1.52573	0.406887	-3.74975	0.000177008	0.0111879		YES
Eln	66.2223	-1.46837	0.391831	-3.74747	0.000178627	0.0112389		YES
Mgll	1444.66	-1.24726	0.333071	-3.74474	0.000180584	0.0112426		YES
Nlrp5-ps	34.3801	-1.74081	0.464942	-3.74414	0.000181009	0.0112426		YES
Tril	141.87	-1.42858	0.381566	-3.74399	0.000181122	0.0112426		YES
Snora7a	1387.47	1.15962	0.309925	3.7416	0.00018285	0.0112992		YES
Rims1	91.5006	-1.82935	0.489182	-3.7396	0.000184313	0.011339		YES
Ncoa7	368.584	-1.50575	0.403113	-3.73531	0.000187481	0.0114828		YES
Ifi27l2a	267.996	-1.61154	0.431653	-3.73342	0.000188901	0.0115188		YES
3930402G23Rik	43.4934	-1.70882	0.458994	-3.72297	0.000196897	0.0119295		YES
Egfl6	86.6751	-1.64352	0.441526	-3.72237	0.000197361	0.0119295		YES
Repin1	91.3864	-1.55388	0.418043	-3.71702	0.000201587	0.012132		YES
Itpka	69.9946	-1.27636	0.344373	-3.70632	0.000210296	0.0125606		YES
Lama4	920.548	-1.30678	0.352712	-3.70495	0.000211431	0.0125606		YES
Trim13	2682.1	1.19387	0.322228	3.70506	0.00021134	0.0125606		YES
Folr4	24.5767	-1.87546	0.506543	-3.70246	0.000213519	0.0126305		YES
B430319G15Rik	42.4985	1.11733	0.302234	3.69692	0.00021823	0.0128542		YES
Pdlim2	404.15	-1.37528	0.372499	-3.69202	0.000222478	0.0130489		YES
Elovl3	408.269	-1.82137	0.49365	-3.68961	0.0002246	0.0131112		YES
Mapk6	13873.1	0.833511	0.226031	3.6876	0.000226382	0.0131112		YES
Scd1	12424	-1.40985	0.382286	-3.68795	0.000226064	0.0131112		YES
Rnf152	547.704	1.208	0.327792	3.68527	0.000228464	0.0131767		YES
Defb6	704.84	-1.75327	0.476294	-3.68106	0.000232265	0.0133403		YES
Slx4ip	214.239	0.773405	0.210262	3.67829	0.000234802	0.0134303		YES
Col8a2	376.817	-1.77297	0.483734	-3.66518	0.000247168	0.0140217		YES
E030024N20Rik	1017.33	0.899103	0.245285	3.66554	0.000246818	0.0140217		YES
Ly6g6c	57.3413	-1.50022	0.409545	-3.66315	0.000249131	0.0140754		YES
Bend7	102.616	-1.71811	0.469194	-3.66182	0.000250428	0.0140911		YES
Hectd2	72.1025	-1.5731	0.43026	-3.65616	0.00025602	0.014343		YES
Tspan18	104.18	-1.48536	0.406367	-3.65521	0.000256976	0.014343		YES
Cdc7	582.127	-0.581932	0.159411	-3.6505	0.00026173	0.0145438		YES
Cdkn2a	511.054	1.88475	0.51643	3.64957	0.000262675	0.0145438		YES
Ptprn2	77.3089	-1.5656	0.429771	-3.64287	0.000269619	0.0148688		YES
Elmo1	145.077	-1.38675	0.381611	-3.63393	0.000279133	0.0153324		YES
Snora17	415.639	1.02703	0.283251	3.62589	0.000287971	0.0157553		YES
Kank4	32.5522	-1.4714	0.405951	-3.62457	0.000289444	0.0157735		YES
Gjb4	1826.59	-1.19869	0.331418	-3.61686	0.000298196	0.0161868		YES
Pygo1	28.6107	-1.51208	0.41835	-3.61439	0.000301058	0.0162783		YES
Prcp	419.422	0.671998	0.186126	3.61044	0.000305674	0.0164636		YES
Myh11	178.634	-1.75678	0.488479	-3.59644	0.000322606	0.0173082		YES
C330021F23Rik	881.042	1.26299	0.351558	3.59256	0.000327448	0.0175002		YES
Gprasp2	29.338	-1.69126	0.472032	-3.58293	0.000339758	0.0180882		YES
Cd164l2	48.0739	-1.43752	0.401496	-3.5804	0.000343064	0.0181806		YES
Itgae	46.7661	-1.39676	0.390199	-3.5796	0.00034412	0.0181806		YES
Mttp	205.821	0.799187	0.22343	3.5769	0.000347696	0.0182996		YES
Cystm1	80.3811	1.315	0.368668	3.56689	0.000361243	0.0189406		YES
Secisbp2l	3417.81	-0.803895	0.225453	-3.5657	0.000362891	0.0189553		YES
Polk	758.956	0.854265	0.239662	3.56446	0.00036461	0.0189734		YES
Il31ra	276.752	-1.81435	0.509277	-3.5626	0.000367201	0.0190367		YES
Man2b1	1552.9	0.660795	0.18566	3.55917	0.000372023	0.0192147		YES
Mc5r	27.3441	-1.78003	0.50056	-3.55608	0.000376437	0.0193704		YES
Snora43	155.206	0.81443	0.229127	3.5545	0.000378698	0.0194146		YES
Fkbp10	343.811	-1.59502	0.449567	-3.54791	0.000388301	0.0198335		YES
Cplx2	63.5244	-1.35494	0.382137	-3.5457	0.000391574	0.0199271		YES
Fndc4	122.826	-1.24257	0.350685	-3.54326	0.000395217	0.0200388		YES
BC016579	233.871	-1.07583	0.303967	-3.5393	0.000401185	0.0202672		YES
Mir1949	408.239	0.970157	0.274706	3.53162	0.00041303	0.0207897		YES
Plag1	71.0904	-1.26049	0.357659	-3.52427	0.000424646	0.0212969		YES
Pdlim3	77.6294	-1.6882	0.480109	-3.51628	0.000437642	0.0218694		YES
Cxcl12	455.66	-1.15045	0.327458	-3.51328	0.000442604	0.0220013		YES
Gm6548	358.242	0.679329	0.193388	3.51277	0.000443459	0.0220013		YES
Sult5a1	220.212	-1.56352	0.446348	-3.50293	0.000460176	0.0227491		YES
Aebp1	316.75	-1.15038	0.329431	-3.49203	0.000479363	0.0236133		YES
Lrrc2	23.1451	1.35498	0.38863	3.48657	0.000489258	0.0238823		YES
Matn4	166.023	-1.75735	0.504093	-3.48616	0.00049	0.0238823		YES
Shc2	56.3202	-1.54138	0.442079	-3.48666	0.000489091	0.0238823		YES
S100a9	2185.34	1.53502	0.440439	3.48521	0.000491746	0.0238833		YES
Gm10804	22.1998	-1.46357	0.420056	-3.48421	0.000493588	0.023889		YES
St8sia4	89.032	1.58129	0.454489	3.47928	0.000502766	0.0242484		YES
Kctd14	45.6486	-1.65343	0.475461	-3.47752	0.000506072	0.0243231		YES
Rgs20	104.867	-1.13673	0.327006	-3.47618	0.000508611	0.0243605		YES
Nyap1	80.6826	-1.2226	0.351815	-3.47511	0.000510638	0.0243733		YES
Klk11	487.234	-1.37844	0.397155	-3.47079	0.000518921	0.0246835		YES
Skint6	92.9631	-1.81603	0.523588	-3.46843	0.000523518	0.0248169		YES
Shroom1	55.6352	-1.43477	0.413803	-3.46727	0.000525764	0.0248383		YES
Fa2h	284.632	-1.65721	0.478143	-3.46592	0.000528414	0.0248786		YES
Snord35b	29.5866	1.00525	0.290175	3.46429	0.000531641	0.0249457		YES
Sh2d4a	281.664	-1.50144	0.433886	-3.46045	0.000539266	0.0251331		YES
Stard4	675.956	0.868245	0.250858	3.4611	0.00053798	0.0251331		YES
Il1b	73.3649	1.4398	0.416575	3.45628	0.000547696	0.0254403		YES
Agbl3	152.422	0.855899	0.24866	3.44205	0.000577315	0.0267264		YES
Anp32a	567.529	-1.38002	0.401399	-3.43801	0.000586003	0.0270382		YES
4933431E20Rik	64.8836	-1.27761	0.372025	-3.43421	0.000594295	0.0272894		YES
Nrg4	126.349	-1.01948	0.296905	-3.43371	0.00059539	0.0272894		YES
Plcl1	89.4426	-1.30107	0.379325	-3.42995	0.000603683	0.0275782		YES
Pnpla5	30.7078	-1.64676	0.48067	-3.42597	0.000612602	0.0278021		YES
Ranbp17	59.1966	-1.21799	0.35543	-3.42682	0.000610701	0.0278021		YES
Dsg1c	24.665	-1.47227	0.430403	-3.42068	0.000624648	0.0282561		YES
Adtrp	495.996	-1.25703	0.367915	-3.41664	0.00063399	0.0284967		YES
Faim3	30.2384	1.16676	0.341499	3.4166	0.000634084	0.0284967		YES
Tnip3	344.165	1.5313	0.448448	3.41467	0.000638592	0.0285142		YES
Trpm3	63.3954	-1.63908	0.479953	-3.41508	0.000637635	0.0285142		YES
Fgf21	28.7367	-1.64263	0.48119	-3.41368	0.000640925	0.0285263		YES
Nrxn1	25.42	-1.3856	0.406661	-3.40726	0.000656189	0.0291121		YES
Gm3230	59.287	0.788325	0.231472	3.4057	0.000659938	0.0291849		YES
Ppp2r2c	610.105	-1.45654	0.428065	-3.40261	0.000667451	0.0294231		YES
Lck	38.3837	-0.964898	0.283744	-3.4006	0.00067238	0.0295463		YES
Rps19-ps3	118.175	1.02476	0.301892	3.39447	0.000687625	0.0301206		YES
Thsd1	108.536	-1.32808	0.391618	-3.39126	0.000695714	0.0303788		YES
Reck	31.086	-1.39281	0.412153	-3.37935	0.000726571	0.0316264		YES
Islr	30.0061	-1.37048	0.405683	-3.3782	0.000729624	0.0316597		YES
Atp2a3	91.634	-1.29562	0.383702	-3.37663	0.000733793	0.0317411		YES
Hspb1	15191.7	0.695525	0.206147	3.37393	0.000741043	0.0319549		YES
Trpc4	23.0598	-1.54307	0.457639	-3.37181	0.000746748	0.0321009		YES
Peg3	59.0992	-1.26637	0.376349	-3.36487	0.000765799	0.0328179		YES
Cpne7	66.6897	-1.51277	0.450376	-3.35889	0.00078256	0.0333459		YES
Ntrk2	529.941	-1.65684	0.49329	-3.35876	0.000782938	0.0333459		YES
Ell3	221.295	-1.06279	0.316721	-3.35559	0.000791966	0.033627		YES
Efcab1	55.6119	-1.47396	0.439634	-3.3527	0.000800278	0.033876		YES
Cela1	43.2017	-1.64798	0.492002	-3.34953	0.000809486	0.0340872		YES
Celsr1	4581.52	0.751378	0.22434	3.34929	0.000810192	0.0340872		YES
Fmod	27.7975	-1.54376	0.461109	-3.34793	0.000814182	0.0341513		YES
Dpysl5	45.9393	-1.30509	0.390136	-3.34521	0.000822202	0.0343834		YES
Oxtr	179.36	-1.72205	0.5164	-3.33473	0.000853817	0.035598		YES
Arhgap31	180.138	-0.806871	0.242025	-3.33383	0.000856588	0.0356063		YES
Cldn6	30.7142	-1.67899	0.503755	-3.33296	0.000859276	0.0356111		YES
Pcdh9	65.8487	1.7509	0.525709	3.33055	0.000866738	0.0358131		YES
Zfp239	79.5302	1.23762	0.371717	3.32947	0.000870128	0.0358461		YES
Spock2	173.365	-1.48511	0.446474	-3.3263	0.000880056	0.0361476		YES
Ldhb	1680.96	-1.11053	0.334119	-3.32375	0.000888168	0.0363729		YES
Krt80	503.47	-1.31726	0.396703	-3.32051	0.000898521	0.0366883		YES
Ltbp1	3298.36	1.11573	0.336159	3.31905	0.000903236	0.0367723		YES
Ces2e	398.037	1.4318	0.43212	3.31344	0.000921568	0.0374087		YES
2810474O19Rik	5924.62	1.26863	0.383167	3.31091	0.000929929	0.0376377		YES
Snord35a	63.7207	0.902784	0.273254	3.30383	0.000953732	0.0384885		YES
Flywch2	130.999	0.660193	0.200119	3.29899	0.000970317	0.039044		YES
Naga	672.929	0.619971	0.187983	3.29802	0.00097368	0.0390657		YES
Muc15	75.3384	-1.31713	0.399494	-3.29699	0.000977253	0.0390958		YES
Snord32a	65.5934	0.973879	0.295999	3.29014	0.00100136	0.0399448		YES
Rgs9	106.308	-1.50046	0.456527	-3.28668	0.00101375	0.0403229		YES
Arhgap10	1129.9	-0.483305	0.147099	-3.28558	0.00101773	0.0403651		YES
Cd24a	6365.33	0.888798	0.270979	3.27995	0.00103824	0.0409439		YES
Dpysl4	52.4783	-1.53949	0.46931	-3.28032	0.00103689	0.0409439		YES
D630003M21Rik	23.9914	-1.63035	0.497384	-3.27786	0.00104597	0.0411317		YES
Palm2	53.7431	-1.29623	0.395621	-3.27645	0.00105119	0.0412199		YES
Armcx2	83.8512	-1.42355	0.435178	-3.27119	0.00107095	0.0416331		YES
Kcnj16	23.9223	-1.6251	0.496867	-3.27069	0.00107286	0.0416331		YES
Mmp17	64.6859	-1.09969	0.336251	-3.27045	0.00107376	0.0416331		YES
Sort1	818.926	-1.39341	0.425836	-3.27217	0.00106727	0.0416331		YES
Ccl11	209.909	1.59319	0.488101	3.26405	0.00109833	0.0423485		YES
Pkdcc	406.396	-1.33332	0.408445	-3.26437	0.00109708	0.0423485		YES
Gpx1	10557.4	0.80591	0.247102	3.26145	0.00110845	0.0425017		YES
Ttc28	106.726	-1.07344	0.329072	-3.26202	0.0011062	0.0425017		YES
Chat	49.0699	-1.64094	0.503777	-3.25727	0.00112488	0.0429054		YES
Gm973	221.647	-1.62838	0.500053	-3.25642	0.00112827	0.0429054		YES
Mir203	41.8456	-0.980542	0.301085	-3.25669	0.00112718	0.0429054		YES
Hgf	57.745	-1.5161	0.465696	-3.25555	0.00113173	0.0429191		YES
Cxx1c	27.0906	-1.56014	0.479413	-3.25428	0.00113681	0.0429936		YES
Akr1b8	3137.46	0.681066	0.209352	3.2532	0.00114112	0.0430394		YES
Tango6	1165.88	1.10949	0.341128	3.2524	0.00114434	0.0430432		YES
Fggy	340.12	0.739484	0.227513	3.25029	0.00115289	0.0432473		YES
Pcbp3	267.112	0.799366	0.246249	3.24617	0.00116968	0.0437585		YES
Ccdc136	113.567	-1.12386	0.346367	-3.2447	0.00117573	0.0438665		YES
Tmem173	479.075	1.26537	0.390479	3.24057	0.00119289	0.044387		YES
Atp6v1b1	44.4805	-1.49612	0.461926	-3.23887	0.00120005	0.0445336		YES
Itih5	448.286	-1.3488	0.416709	-3.2368	0.0012088	0.0447385		YES
Arhgap28	98.8028	-1.44076	0.445479	-3.23418	0.00121992	0.0450106		YES
Snord65	26.1326	1.05919	0.327564	3.23354	0.00122266	0.0450106		YES
1700001O22Rik	42.4291	1.05351	0.326525	3.22642	0.00125351	0.0457814		YES
Fstl1	586.82	-1.33141	0.412631	-3.22664	0.00125253	0.0457814		YES
Gpc2	165.841	-0.954459	0.295748	-3.22727	0.00124976	0.0457814		YES
Cmbl	58.0997	-1.31771	0.408648	-3.22456	0.00126165	0.0458365		YES
Ugt1a6a	239.714	0.768969	0.238466	3.22465	0.00126127	0.0458365		YES
Amt	59.0645	-1.30876	0.406155	-3.22231	0.00127164	0.0459791		YES
G0s2	27.6395	-1.63457	0.507289	-3.22218	0.00127221	0.0459791		YES
Efcab4a	225.234	-1.302	0.404324	-3.22018	0.00128109	0.0461792		YES
Prlr	491.397	-1.26163	0.39201	-3.21836	0.00128925	0.0463528		YES
6430573F11Rik	26.8154	-1.27113	0.395075	-3.21743	0.00129344	0.0463829		YES
Atp1a2	52.9282	-1.41578	0.440315	-3.21538	0.00130271	0.0465947		YES
Ecscr	80.1706	1.1936	0.371559	3.21241	0.00131627	0.0469584		YES
9930012K11Rik	43.2125	-1.21429	0.378444	-3.20863	0.00133368	0.0474569		YES
Tmtc1	202.836	-1.3467	0.420026	-3.20622	0.0013449	0.0477336		YES
Glipr1	155.257	1.50587	0.470267	3.20216	0.00136403	0.0482889		YES
Snord55	179.739	0.644701	0.201544	3.19881	0.00137997	0.0487284		YES
Slc9a2	39.9967	-1.52913	0.478217	-3.19757	0.00138592	0.0488141		YES
Kit	68.6513	-1.40354	0.439792	-3.19138	0.00141592	0.0497442		YES
Tusc1	87.7376	0.591519	0.185551	3.1879	0.0014331	0.0502202		NO
Adcy9	724.098	-0.578363	0.18152	-3.18623	0.00144141	0.050384		NO
Rims2	36.1184	-1.61027	0.505669	-3.18444	0.00145034	0.0505684		NO
Stag3	27.3798	-1.25977	0.396357	-3.17837	0.00148106	0.0515096		NO
Antxr2	4284.16	1.13978	0.358856	3.17615	0.00149244	0.0517754		NO
1700056E22Rik	41.2318	0.904161	0.284872	3.17392	0.00150394	0.052044		NO
Unc13b	621.612	-1.03487	0.326376	-3.1708	0.00152021	0.0524755		NO
Ank	1795.93	-1.44116	0.455276	-3.16547	0.00154834	0.0531197		NO
Ces1d	88.5703	-1.53481	0.484918	-3.16508	0.00155038	0.0531197		NO
Dapk2	516.663	-1.3266	0.41898	-3.16625	0.00154419	0.0531197		NO
0610031J06Rik	1117.72	0.50039	0.158297	3.16109	0.00157181	0.053721		NO
Pgm2	2763.92	0.804043	0.254479	3.15956	0.00158008	0.0538706		NO
Dlg2	60.0757	-1.44209	0.456655	-3.15793	0.00158891	0.0540387		NO
Camkv	46.3189	-1.39432	0.441746	-3.15637	0.00159745	0.0541959		NO
Nmrk1	244.679	0.62395	0.197806	3.15435	0.00160858	0.05444		NO
Mfsd3	221.562	0.647994	0.205598	3.15175	0.00162293	0.0546584		NO
Snord66	33.8522	1.00402	0.318552	3.15182	0.00162255	0.0546584		NO
Pmaip1	4402.26	1.2102	0.384265	3.1494	0.00163607	0.0549673		NO
Adipor1	5815.9	0.410676	0.13058	3.14502	0.00166075	0.0554458		NO
Cyp2d22	41.3515	-1.25936	0.400495	-3.1445	0.00166371	0.0554458		NO
Nfatc4	37.9616	-1.08594	0.345395	-3.14404	0.00166634	0.0554458		NO
Slfn3	67.2301	1.21704	0.387093	3.14405	0.00166628	0.0554458		NO
Mxra7	36.8858	-1.2303	0.391534	-3.14225	0.00167655	0.0556518		NO
Med10	1851.37	0.569761	0.181687	3.13595	0.001713	0.0567257		NO
Tro	29.5951	-1.3819	0.441409	-3.13066	0.00174417	0.0576199		NO
Insig1	3477.69	0.882155	0.2819	3.12932	0.00175211	0.0577445		NO
Armcx6	61.3128	-1.23942	0.397315	-3.11948	0.00181172	0.0590067		NO
Ddah1	46.8512	0.777138	0.24897	3.12141	0.00179986	0.0590067		NO
Fam72a	55.341	0.755093	0.242003	3.12018	0.0018074	0.0590067		NO
Ildr1	85.9145	-1.27976	0.410239	-3.11956	0.00181123	0.0590067		NO
Mmp1b	521.429	1.42879	0.457888	3.1204	0.00180605	0.0590067		NO
BC100530	41739.8	1.45605	0.467456	3.11484	0.00184046	0.059662		NO
Gm16998	49.3942	1.0305	0.330788	3.11529	0.00183765	0.059662		NO
A930015D03Rik	44.5378	-0.894295	0.287332	-3.11241	0.0018557	0.0600153		NO
Tbc1d16	113.147	-1.0748	0.345409	-3.11168	0.00186028	0.0600233		NO
Capsl	94.3734	1.06796	0.343779	3.10652	0.00189302	0.0609377		NO
Myoc	31.562	-1.12512	0.362333	-3.1052	0.00190151	0.0610688		NO
Gstm5	478.658	-0.82322	0.265465	-3.10104	0.0019284	0.0617892		NO
Tekt2	44.3362	-0.906303	0.292896	-3.09428	0.00197292	0.0630697		NO
Cldn1	6398.76	-1.11242	0.359656	-3.09302	0.00198131	0.063082		NO
Mmp23	41.4616	-1.19464	0.386259	-3.09285	0.00198242	0.063082		NO
Sat1	14657.5	0.868478	0.280948	3.09124	0.00199325	0.0632811		NO
Krt76	38.1994	-1.51188	0.489408	-3.0892	0.00200697	0.063571		NO
Gm15421	202.653	0.943647	0.305775	3.08608	0.00202811	0.063658		NO
Ppap2a	182.19	-1.0988	0.355887	-3.0875	0.00201848	0.063658		NO
Ptn	1487.82	-1.03803	0.336225	-3.0873	0.00201983	0.063658		NO
Tchhl1	28.3598	1.41666	0.459025	3.08625	0.00202701	0.063658		NO
Dhdh	72.4803	-0.930194	0.301519	-3.08502	0.00203536	0.0637409		NO
Acoxl	99.7158	-1.34627	0.436746	-3.08251	0.00205266	0.0641375		NO
Efnb2	3357.28	-0.838392	0.27226	-3.07938	0.00207435	0.0646692		NO
Mospd2	748.221	0.440092	0.143028	3.07696	0.00209122	0.0650487		NO
B3gnt9	85.6676	1.04349	0.339235	3.076	0.00209798	0.0651127		NO
Gm5416	1059.6	1.53257	0.498425	3.07483	0.00210622	0.0652221		NO
Atp10b	75.5335	-1.24224	0.404289	-3.07266	0.00212161	0.065552		NO
9030617O03Rik	449.107	1.20217	0.391648	3.06951	0.00214407	0.0660985		NO
Sectm1b	31	-1.2637	0.411835	-3.06846	0.00215168	0.0661858		NO
Glul	7078.06	-1.07234	0.349828	-3.06534	0.00217425	0.0664369		NO
Slc29a1	1275.32	-0.744822	0.242899	-3.06639	0.00216661	0.0664369		NO
Zdhhc2	222.52	-0.968324	0.315858	-3.06569	0.00217168	0.0664369		NO
Bnip3	3414.82	1.02896	0.335859	3.06368	0.00218634	0.0665129		NO
Piezo2	130.651	-1.33374	0.435277	-3.06412	0.00218308	0.0665129		NO
Mycn	70.5351	-1.02027	0.333178	-3.06224	0.00219691	0.0666876		NO
Stfa3	34454.8	1.49678	0.488978	3.06105	0.00220565	0.0668066		NO
Exoc4	3048.11	0.942625	0.30806	3.05987	0.00221432	0.0668698		NO
Ltb4r1	706.401	0.898262	0.293602	3.05946	0.0022174	0.0668698		NO
Egln1	4402.98	0.856737	0.280198	3.05761	0.00223108	0.0669904		NO
Slit3	166.242	-1.17424	0.383974	-3.05812	0.0022273	0.0669904		NO
Kalrn	752.081	-1.25433	0.410328	-3.0569	0.00223641	0.0670051		NO
Serpina3n	191.931	-1.24282	0.406654	-3.0562	0.00224162	0.0670162		NO
Chil1	593.23	-1.28149	0.419788	-3.05272	0.0022678	0.0675074		NO
Isg15	125.795	-1.24392	0.407471	-3.05278	0.00226732	0.0675074		NO
Scml2	82.4133	-1.15644	0.379071	-3.05071	0.00228298	0.0678132		NO
Mir6516	963.076	0.699162	0.229246	3.04984	0.00228967	0.0678663		NO
Ablim3	170.482	-1.41123	0.463693	-3.04346	0.00233873	0.0691724		NO
Tbc1d32	544.852	0.568714	0.18702	3.04093	0.00235848	0.0696077		NO
Acsf2	112.321	-0.854595	0.28148	-3.03607	0.00239681	0.0705887		NO
Mef2c	67.7819	-1.34988	0.444882	-3.03426	0.0024113	0.0708646		NO
Fam162a	8263.71	0.678637	0.223984	3.02984	0.00244683	0.0717563		NO
Lrfn3	23.59	-1.0982	0.362798	-3.02702	0.00246979	0.0719722		NO
Rasl12	33.8427	-1.46673	0.484481	-3.02743	0.00246647	0.0719722		NO
Serpinb3a	229.89	1.37079	0.452698	3.02805	0.00246135	0.0719722		NO
Sdcbp2	488.803	-1.31182	0.433567	-3.02565	0.00248097	0.0721461		NO
Hsd3b6	24.4922	-1.53475	0.508302	-3.01936	0.00253306	0.0733528		NO
Pcdhb21	36.6739	0.892608	0.295605	3.0196	0.00253107	0.0733528		NO
Gm5148	43.0169	0.816672	0.270564	3.01841	0.00254107	0.073431		NO
Dclk3	29.2412	-1.10873	0.367764	-3.01479	0.00257158	0.0741579		NO
Ccdc122	268.967	0.860038	0.28557	3.01165	0.00259831	0.0746179		NO
Pcsk1	116.932	-1.51395	0.50264	-3.01201	0.00259528	0.0746179		NO
Csgalnact1	300.667	-0.979123	0.325412	-3.00887	0.00262224	0.0751493		NO
Capg	18936.9	0.667598	0.221924	3.00823	0.00262776	0.0751519		NO
Commd3	1562.11	0.776383	0.258172	3.00723	0.00263641	0.0752438		NO
Abhd3	59.5515	-0.987605	0.329177	-3.00023	0.00269778	0.0762096		NO
Camsap3	396.144	-0.846552	0.281937	-3.00263	0.00267659	0.0762096		NO
Churc1	1815.79	0.577336	0.192369	3.00119	0.00268927	0.0762096		NO
Clip1	4443.08	-0.666283	0.222009	-3.00116	0.00268954	0.0762096		NO
Ldlrad3	341.294	-0.983384	0.327733	-3.00056	0.0026948	0.0762096		NO
Ntrk3	32.7983	-1.20588	0.402133	-2.9987	0.00271135	0.0764155		NO
Pcyt1b	184.894	1.05567	0.352106	2.99816	0.00271611	0.0764155		NO
Pcdhb22	84.6771	0.868755	0.290101	2.99466	0.00274752	0.0768307		NO
Retsat	826.918	0.718434	0.239892	2.99482	0.00274607	0.0768307		NO
Scara3	109.21	-1.30355	0.435194	-2.99532	0.00274153	0.0768307		NO
Cenpl	127.089	-0.668877	0.22343	-2.99368	0.00275632	0.0769212		NO
Atp1a1	62627.9	0.726118	0.242736	2.99139	0.0027771	0.07719		NO
Tenc1	175.796	-0.776537	0.25958	-2.99151	0.00277597	0.07719		NO
Dtl	606.538	-0.547438	0.183141	-2.98916	0.00279745	0.0775999		NO
Sdk2	135.58	-1.18117	0.395334	-2.98778	0.00281014	0.0776631		NO
Slc44a3	73.5937	-1.37152	0.459057	-2.98769	0.00281095	0.0776631		NO
Rtn4rl1	55.892	-1.20022	0.402059	-2.9852	0.00283397	0.0781431		NO
Fgl1	24.3926	1.09497	0.366906	2.98435	0.00284183	0.078204		NO
F8	56.7	0.708655	0.237772	2.9804	0.00287869	0.0790612		NO
Tdh	351.943	1.37384	0.461086	2.97958	0.00288648	0.0791181		NO
Cyth4	34.7126	-1.34421	0.451307	-2.97848	0.00289679	0.0792438		NO
Otud1	903.891	0.714707	0.240161	2.97595	0.00292085	0.0796632		NO
Syt9	29.5151	-1.20556	0.40514	-2.97566	0.00292363	0.0796632		NO
Clca1	158.823	-1.22813	0.413026	-2.97349	0.00294435	0.0800702		NO
Lgals12	38.1237	-1.1376	0.382797	-2.97181	0.00296045	0.0803502		NO
Npm3-ps1	38.6215	0.923497	0.310834	2.97103	0.00296807	0.0803993		NO
Mme	79.7981	-1.52308	0.512885	-2.96963	0.00298157	0.0806073		NO
Cttnbp2	37.0801	-1.21807	0.410441	-2.96771	0.00300027	0.0809546		NO
Ccdc8	22.5533	-1.35369	0.45695	-2.96245	0.00305196	0.0820297		NO
Snx20	56.3767	-1.48782	0.502176	-2.96274	0.00304912	0.0820297		NO
1700030C10Rik	22.8159	1.47028	0.497078	2.95784	0.00309804	0.0831068		NO
Aspn	238.653	-1.52162	0.514577	-2.95703	0.00310622	0.0831538		NO
Snord82	30.9482	0.879903	0.297619	2.95647	0.00311181	0.0831538		NO
Gfra2	48.9856	-1.32977	0.449944	-2.95542	0.00312244	0.0832772		NO
Ifit1	229.993	-1.35054	0.457073	-2.95476	0.00312912	0.0832947		NO
Atp2c1	5091.41	0.568964	0.192642	2.95348	0.00314217	0.0834817		NO
Gli1	109.406	-1.24065	0.420182	-2.95263	0.00315075	0.0835491		NO
Eppk1	4305.12	-0.73479	0.249345	-2.94688	0.00321001	0.0847957		NO
Ggt1	78.6789	-1.3813	0.468725	-2.94694	0.00320932	0.0847957		NO
Prelid2	382.975	1.01009	0.343017	2.94472	0.00323244	0.0852255		NO
Nme4	432.637	1.04275	0.354298	2.94315	0.00324894	0.0854977		NO
Mndal	176.965	1.47615	0.501971	2.9407	0.00327468	0.0860099		NO
Skint3	880.501	-1.33868	0.455316	-2.94012	0.00328083	0.0860099		NO
Lgals3bp	247.17	-1.05691	0.359646	-2.93875	0.0032954	0.0861004		NO
Tnc	23629.3	1.08203	0.36821	2.93862	0.00329672	0.0861004		NO
Zc4h2	26.4697	-0.914583	0.311485	-2.9362	0.0033226	0.0866128		NO
Gm16702	585.036	0.955805	0.325607	2.93546	0.00333053	0.0866564		NO
Gm5414	23.153	1.23323	0.420461	2.93303	0.00335666	0.0870092		NO
Larp6	24.2494	-1.24707	0.425155	-2.93322	0.0033547	0.0870092		NO
Josd2	529.492	0.488993	0.166816	2.93134	0.00337507	0.0873227		NO
Srgn	45.4671	1.11467	0.380472	2.9297	0.00339285	0.087619		NO
Lurap1	34.523	-0.82011	0.280078	-2.92815	0.00340988	0.0878948		NO
2810029C07Rik	292.703	0.783669	0.267845	2.92583	0.00343535	0.0882229		NO
Gjb3	1248.32	-0.926033	0.316458	-2.92625	0.0034308	0.0882229		NO
Inip	493.623	-0.388265	0.132813	-2.9234	0.00346226	0.0887493		NO
Gbp5	25.2061	-1.21018	0.414501	-2.9196	0.00350477	0.0896729		NO
Cxx1a	47.1117	-1.17981	0.404304	-2.91812	0.00352146	0.0897681		NO
Msi1	34.5489	-1.48689	0.509474	-2.91848	0.00351746	0.0897681		NO
Slc28a3	344.673	-1.50646	0.516347	-2.91754	0.00352802	0.0897699		NO
Nynrin	139.945	-1.17674	0.403541	-2.91604	0.0035451	0.0900391		NO
5730408K05Rik	666.872	0.84528	0.290092	2.91383	0.00357019	0.0901798		NO
Tcf7	153.614	-0.821919	0.282067	-2.91391	0.00356928	0.0901798		NO
Tpcn2	728.739	0.945263	0.324353	2.91431	0.0035648	0.0901798		NO
Chst3	138.761	-1.06649	0.366746	-2.90798	0.00363772	0.0917182		NO
Fastkd1	194.73	-0.570462	0.196378	-2.90491	0.00367354	0.0924531		NO
Wnk2	217.252	-0.829396	0.285926	-2.90073	0.00372293	0.0935259		NO
Kcnma1	38.0516	-1.3684	0.472028	-2.89899	0.00374372	0.093708		NO
Neu1	469.761	0.565998	0.195204	2.89953	0.00373728	0.093708		NO
Zmat3	569.009	1.0304	0.3556	2.89764	0.00375983	0.0939414		NO
Qsox2	940.166	0.574962	0.198526	2.89615	0.00377767	0.0942172		NO
2010005H15Rik	435.064	1.42194	0.491407	2.89361	0.00380845	0.0947799		NO
4921531C22Rik	65.6347	0.725026	0.250649	2.89259	0.00382078	0.0947799		NO
Cxxc5	67.3546	-1.07533	0.371738	-2.89269	0.00381952	0.0947799		NO
Ppfibp2	747.595	-0.763207	0.263945	-2.89153	0.00383366	0.0949293		NO
Gm14057	40.5829	0.753716	0.260762	2.89043	0.0038471	0.0950922		NO
Rgs14	44.1825	-0.99675	0.344915	-2.88985	0.00385431	0.0951005		NO
Cyp17a1	307.311	-1.47438	0.510806	-2.88639	0.00389695	0.0959815		NO
Rcn3	66.1102	-1.19607	0.414511	-2.88549	0.00390805	0.0959945		NO
Serpinb11	551.09	-1.43454	0.497203	-2.88522	0.00391135	0.0959945		NO
Ccl8	545.747	1.51886	0.527055	2.88178	0.00395432	0.0968774		NO
Mylk	203.899	-1.20165	0.417318	-2.87946	0.00398356	0.0974124		NO
Unc13d	255.831	-0.991179	0.344287	-2.87893	0.00399024	0.0974124		NO
Sfr1	8530.5	0.544722	0.18934	2.87696	0.0040153	0.0978517		NO
Fam26e	40.3971	-1.38627	0.481952	-2.87636	0.00402288	0.0978641		NO
A4galt	24.9654	-1.02207	0.355502	-2.875	0.00404033	0.0979059		NO
Cipc	560.628	-0.57016	0.198385	-2.87402	0.00405289	0.0979059		NO
Fbxo33	4102.33	1.1237	0.390968	2.87413	0.00405136	0.0979059		NO
Slc26a9	121.481	-1.25773	0.437592	-2.8742	0.00405054	0.0979059		NO
Smarca1	31.1401	-1.18744	0.41329	-2.87313	0.00406426	0.0979204		NO
Snora61	798.099	1.00454	0.349665	2.87287	0.00406764	0.0979204		NO
Adamts17	79.5399	-0.926508	0.323046	-2.86803	0.00413032	0.098254		NO
Cacnb1	44.8308	-0.947299	0.330227	-2.86863	0.00412258	0.098254		NO
Cdh3	6564.91	0.58083	0.202487	2.86848	0.00412454	0.098254		NO
Elovl6	2824.26	-1.15358	0.402305	-2.86742	0.00413828	0.098254		NO
H1fx	21.5074	-1.09107	0.380363	-2.8685	0.00412419	0.098254		NO
Nrcam	51.9307	-1.36956	0.477085	-2.87069	0.00409579	0.098254		NO
Ptp4a3	590.578	1.15282	0.401937	2.86817	0.00412853	0.098254		NO
Rbfox1	22.0237	-1.22021	0.425467	-2.86794	0.00413149	0.098254		NO
Mtus1	491.052	-0.979339	0.341629	-2.86667	0.00414814	0.0983193		NO
Bhlhe41	393.156	-1.21064	0.42261	-2.86469	0.00417423	0.0986694		NO
Cep70	227.835	-0.696325	0.243108	-2.86426	0.00417989	0.0986694		NO
Cxx1b	125.974	-1.30711	0.456406	-2.86392	0.00418429	0.0986694		NO
Ctnnd2	67.5264	-1.2229	0.427093	-2.86331	0.00419238	0.098692		NO
Arhgap40	190.775	-1.35396	0.473047	-2.86221	0.00420699	0.098728		NO
Cacna2d2	59.7071	-1.08624	0.37963	-2.86132	0.00421875	0.098728		NO
Eif4e3	935.453	0.691286	0.241691	2.86021	0.00423361	0.098728		NO
Kctd1	819.392	-0.541797	0.1894	-2.8606	0.00422843	0.098728		NO
Lepr	101.865	1.04038	0.363772	2.85998	0.0042367	0.098728		NO
Rpl30	28.3703	0.874455	0.305632	2.86113	0.00422131	0.098728		NO
B630005N14Rik	1307.87	0.694477	0.242953	2.85849	0.00425667	0.0990265		NO
Pkm	114942	0.704542	0.246835	2.85431	0.00431306	0.10017		NO
Cd300a	107.101	1.20578	0.422618	2.85312	0.0043292	0.100376		NO
Acss2	510.952	-0.860513	0.301912	-2.85021	0.00436901	0.10113		NO
Gnpda1	278.004	0.694212	0.243718	2.84843	0.0043936	0.10153		NO
Cmklr1	25.5625	-1.20945	0.424854	-2.84674	0.00441693	0.101898		NO
Cd81	5643.31	0.978874	0.344479	2.84161	0.00448865	0.103381		NO
Wfdc3	86.3978	-1.45729	0.513061	-2.84038	0.00450599	0.103608		NO
Erp44	1629.3	0.410122	0.144428	2.83963	0.00451662	0.103679		NO
Zfp941	511.114	1.29642	0.456631	2.8391	0.00452405	0.103679		NO
Fam189b	28.7272	-0.940121	0.331615	-2.83498	0.00458289	0.104853		NO
Grip1	1169.98	0.845236	0.298444	2.83214	0.00462379	0.105615		NO
Lactb2	574.269	0.448679	0.158835	2.82482	0.00473075	0.107369		NO
Mafb	2088.99	0.93958	0.332562	2.82528	0.00472393	0.107369		NO
Nabp1	1621.33	0.701382	0.248454	2.82299	0.00475788	0.107369		NO
Npr3	84.7624	-1.18313	0.41878	-2.82518	0.00472538	0.107369		NO
Psph	2304.83	-0.821791	0.291023	-2.8238	0.00474585	0.107369		NO
Sele	151.358	1.36827	0.484744	2.82266	0.00476266	0.107369		NO
Serpinb7	257.897	-1.4681	0.520032	-2.8231	0.00475612	0.107369		NO
Slc1a2	138.814	1.44003	0.509865	2.82434	0.00473777	0.107369		NO
Adam9	2395.56	0.342924	0.121595	2.82022	0.00479903	0.107729		NO
Has3	6979.2	1.19456	0.423597	2.82003	0.00480196	0.107729		NO
Tmem26	24.3861	1.21964	0.43235	2.82094	0.00478825	0.107729		NO
Ism1	142.538	-1.03254	0.366251	-2.81922	0.00481399	0.107824		NO
Acss1	106.697	-0.939391	0.333358	-2.81796	0.00483292	0.107862		NO
Nfu1	812.529	0.729331	0.258852	2.81756	0.00483907	0.107862		NO
Pank1	1062.69	-0.757573	0.268839	-2.81795	0.00483319	0.107862		NO
Aadac	573.949	-1.34072	0.476008	-2.81659	0.00485367	0.10791		NO
Mir8112	30.3158	0.723024	0.256721	2.81638	0.0048568	0.10791		NO
Acer1	341.373	-1.32611	0.471601	-2.81193	0.00492456	0.10924		NO
Cyb5r3	4085.39	0.55417	0.19714	2.81104	0.00493818	0.109367		NO
Nt5dc2	2636.81	0.92014	0.327477	2.80979	0.00495746	0.109618		NO
Arglu1	1389.57	-0.375424	0.133712	-2.8077	0.00498968	0.109915		NO
Irf4	99.6328	1.15399	0.411056	2.80737	0.00499471	0.109915		NO
Snora41	114.312	0.729319	0.259787	2.80738	0.00499466	0.109915		NO
Bzrap1	105.286	-0.945137	0.336938	-2.80507	0.0050305	0.110003		NO
Chrm4	35.4556	1.1178	0.398304	2.8064	0.0050098	0.110003		NO
Ddit4	3702.97	0.885757	0.315715	2.80556	0.00502299	0.110003		NO
Wwox	405.733	0.464289	0.165479	2.80572	0.00502039	0.110003		NO
Igtp	201.808	-1.26745	0.452132	-2.80327	0.00505874	0.110446		NO
Camkk1	248.09	-1.18839	0.424065	-2.80237	0.0050729	0.110491		NO
Plod3	2001.86	0.479912	0.171267	2.80212	0.00507673	0.110491		NO
Ly6d	10827.1	-1.07678	0.38448	-2.80062	0.00510038	0.110831		NO
Npnt	511.452	-1.0947	0.391029	-2.79954	0.0051176	0.111031		NO
Atp1b1	164.144	-0.967143	0.346083	-2.79454	0.00519738	0.112235		NO
Gm436	36.5994	-1.39449	0.498877	-2.79526	0.00518575	0.112235		NO
Slc2a1	23634.5	0.793996	0.284174	2.79405	0.00520526	0.112235		NO
Tspan3	8231.34	0.878492	0.314417	2.79403	0.00520552	0.112235		NO
Flrt3	10894.1	1.0549	0.377808	2.79217	0.00523563	0.112708		NO
Gpr146	98.1697	-1.165	0.417374	-2.79125	0.00525047	0.112853		NO
Ly6g6e	129.9	-1.42342	0.510187	-2.79	0.0052708	0.113114		NO
4933409K07Rik	651.286	1.11843	0.401119	2.78826	0.00529915	0.113371		NO
Nup210	331.829	-0.927139	0.332457	-2.78875	0.00529118	0.113371		NO
Kazald1	100.41	-1.1939	0.428394	-2.78692	0.00532114	0.113666		NO
Angpt1	83.6382	-1.33434	0.479032	-2.78549	0.00534465	0.113992		NO
BC117090	349.738	1.33345	0.47952	2.78081	0.00542242	0.115473		NO
Mpv17l	250.521	0.770737	0.277459	2.77784	0.00547219	0.116353		NO
Hspa1l	314.482	1.0888	0.39222	2.776	0.0055032	0.116833		NO
Smim1	79.7574	-0.904128	0.325758	-2.77546	0.00551241	0.11685		NO
Psmd8	6275.88	0.452451	0.163052	2.77489	0.00552209	0.116876		NO
Ncmap	57.2251	-1.24309	0.448546	-2.77138	0.00558192	0.117962		NO
Amdhd2	340.396	0.871602	0.314991	2.76707	0.00565628	0.119351		NO
Cntn2	178.04	-1.03484	0.374206	-2.76544	0.00568463	0.119701		NO
Ifit3	41.0083	-1.41061	0.510142	-2.76512	0.00569015	0.119701		NO
Cyp2w1	32.9053	-1.22129	0.441918	-2.76362	0.00571638	0.12007		NO
2310007B03Rik	209.277	-1.1784	0.427365	-2.75737	0.0058268	0.122071		NO
Fut2	115.919	-1.19466	0.433283	-2.75723	0.0058293	0.122071		NO
Rbms3	413.907	-0.962152	0.349297	-2.75454	0.00587755	0.122896		NO
Apbb1	78.0649	-0.965981	0.350808	-2.75359	0.00589454	0.123065		NO
Adamts3	45.0351	-0.927457	0.336999	-2.7521	0.00592137	0.123439		NO
2410131K14Rik	483.063	0.404317	0.147085	2.74886	0.0059803	0.12448		NO
Cyp27a1	371.212	-1.14343	0.416299	-2.74666	0.00602048	0.124821		NO
D3Bwg0562e	76.5641	-1.3817	0.503078	-2.7465	0.00602358	0.124821		NO
Tbc1d4	520.13	-0.622247	0.226561	-2.74649	0.00602371	0.124821		NO
Bdnf	92.7864	-1.21497	0.442818	-2.74372	0.00607466	0.125441		NO
Tmem45b	238.455	-1.19004	0.43378	-2.74342	0.00608031	0.125441		NO
Vipr1	68.2517	-1.27617	0.465181	-2.74339	0.00608084	0.125441		NO
Tnfrsf10b	644.805	0.824487	0.300698	2.74191	0.00610827	0.12582		NO
Hoxa7	206.389	1.27359	0.464674	2.74083	0.00612837	0.126046		NO
Cd14	237.631	0.952994	0.348175	2.73711	0.0061981	0.127278		NO
Ghdc	331.969	0.526364	0.192338	2.73666	0.00620668	0.127278		NO
Krt17	95955.3	-0.796787	0.291586	-2.73259	0.0062838	0.128479		NO
Tmc4	181.028	-1.17022	0.428197	-2.73291	0.00627782	0.128479		NO
Gstm1	367.847	-1.06527	0.389967	-2.73169	0.00630104	0.128642		NO
Lrig1	7775.79	-0.858823	0.314629	-2.72964	0.00634045	0.129207		NO
Sema3b	242.874	-1.15924	0.424789	-2.72897	0.0063532	0.129207		NO
Tmem117	76.0056	1.31825	0.483091	2.72879	0.00635673	0.129207		NO
Abi3bp	144.278	-1.0461	0.383499	-2.72778	0.00637623	0.129413		NO
Bnip3l	5021.35	0.50947	0.186846	2.72669	0.00639734	0.129652		NO
Gpam	963.909	-0.803938	0.295039	-2.72486	0.00643297	0.130183		NO
Col14a1	131.829	-1.20039	0.440838	-2.72298	0.00646959	0.130542		NO
Scarna17	122.389	0.615276	0.225951	2.72305	0.00646832	0.130542		NO
Rab5c	4516	0.560146	0.205832	2.72137	0.00650113	0.130988		NO
Enpp6	25.1738	-1.28079	0.470837	-2.72024	0.00652343	0.131064		NO
Npr1	165.948	-1.16694	0.428986	-2.72022	0.00652384	0.131064		NO
Dhh	96.9504	1.28946	0.474235	2.71902	0.00654747	0.131348		NO
Astn2	28.3845	-1.36549	0.50264	-2.71664	0.00659476	0.132105		NO
Akap2	289.393	-0.816131	0.300766	-2.7135	0.00665758	0.133151		NO
Rufy3	653.957	-0.431999	0.159229	-2.71307	0.00666621	0.133151		NO
Kctd4	608.553	0.930715	0.343348	2.7107	0.00671406	0.133721		NO
Pik3cb	841.639	-0.629791	0.232302	-2.71109	0.00670629	0.133721		NO
Itm2b	24265.1	0.48458	0.178965	2.70768	0.00677562	0.134753		NO
Fn1	536.024	-1.10374	0.408079	-2.70473	0.00683594	0.135563		NO
Mfsd10	1206.4	0.597026	0.22072	2.70491	0.00683238	0.135563		NO
Nab1	4599.41	0.511054	0.189216	2.7009	0.00691529	0.136941		NO
A330069E16Rik	55.846	0.756251	0.28021	2.69887	0.00695755	0.137409		NO
Mllt4	7813.6	-0.605179	0.224239	-2.69881	0.00695878	0.137409		NO
Tmem144	258.878	0.668359	0.247804	2.69713	0.00699409	0.137909		NO
Msra	253.757	-0.605907	0.224808	-2.69523	0.00703409	0.1385		NO
Scand1	1079.97	0.472529	0.175415	2.69378	0.00706471	0.138906		NO
Dnajb1	13091.9	0.543963	0.202064	2.69203	0.00710176	0.139348		NO
Elmo3	940.191	0.561904	0.208749	2.69177	0.00710735	0.139348		NO
Begain	45.4452	-1.00822	0.374639	-2.69118	0.00712005	0.1394		NO
Nlrp3	54.0162	1.29549	0.481504	2.69051	0.00713438	0.139483		NO
BC024139	29.2082	-1.10054	0.409305	-2.68882	0.00717061	0.139994		NO
S100a8	1883.47	1.22626	0.45617	2.68816	0.00718462	0.14007		NO
Ak1	1856.43	0.766506	0.285228	2.68735	0.00720218	0.140215		NO
Porcn	2107.25	0.838422	0.312094	2.68644	0.0072218	0.140399		NO
Sytl4	56.0443	-0.978879	0.364614	-2.6847	0.00725949	0.140934		NO
Itga2b	256.561	0.617133	0.230125	2.68173	0.00732433	0.141597		NO
Lingo1	52.6796	-1.03064	0.384304	-2.68184	0.00732194	0.141597		NO
Liph	298.246	-0.981853	0.366112	-2.68184	0.00732187	0.141597		NO
AI464131	282.169	-0.857746	0.319972	-2.68069	0.00734701	0.141837		NO
Anks6	32.7174	-1.27741	0.476885	-2.67866	0.00739182	0.142109		NO
Gm5803	139.784	0.853037	0.318391	2.67921	0.00737957	0.142109		NO
Lsmem1	111.045	1.17141	0.437464	2.67774	0.00741207	0.142109		NO
Pacs1	515.627	0.5758	0.214997	2.67817	0.00740253	0.142109		NO
Vopp1	1882.46	0.45112	0.168471	2.67772	0.00741242	0.142109		NO
Fitm2	745.129	-0.609894	0.22819	-2.67275	0.00752328	0.144035		NO
Mia	26.1569	-1.16977	0.438048	-2.67041	0.00757588	0.144842		NO
Neo1	2257.4	0.493695	0.184925	2.66969	0.00759202	0.14495		NO
Nupr1	1417.56	0.935824	0.350699	2.66845	0.0076201	0.145286		NO
Rhbdd1	1344.93	0.480847	0.180245	2.66774	0.00763628	0.145394		NO
Mxra8	86.817	-0.85768	0.32189	-2.66451	0.00771004	0.146396		NO
Snord23	30.9806	0.990445	0.371688	2.66472	0.00770526	0.146396		NO
Cd109	6862.88	-0.790743	0.296936	-2.663	0.00774467	0.146455		NO
Ddah2	219.355	-0.794749	0.29836	-2.66372	0.00772815	0.146455		NO
H6pd	598.709	-0.744422	0.27964	-2.66207	0.00776608	0.146455		NO
Kcnrg	148.479	1.12929	0.42416	2.66241	0.00775839	0.146455		NO
Tbcd	2831.36	0.500337	0.187943	2.66218	0.00776367	0.146455		NO
2210039B01Rik	110.002	-0.735276	0.276342	-2.66075	0.00779666	0.146832		NO
E330009J07Rik	308.696	-0.545196	0.20503	-2.6591	0.00783505	0.147171		NO
Pdk1	3383.27	0.819071	0.30803	2.65906	0.00783592	0.147171		NO
Apoe	87085	-0.965461	0.363198	-2.65822	0.00785534	0.147336		NO
Nupr1l	24.9887	0.86116	0.324351	2.65502	0.00793026	0.148539		NO
Abcg4	31.7601	-0.873476	0.329281	-2.65268	0.00798557	0.148747		NO
Acyp2	68.8283	-1.10153	0.415123	-2.6535	0.00796623	0.148747		NO
Bsg	10788.8	0.524329	0.197878	2.64976	0.00805491	0.148747		NO
Deptor	709.373	-0.613501	0.231504	-2.65006	0.00804771	0.148747		NO
Dio2	2218.34	1.30682	0.493048	2.65048	0.00803771	0.148747		NO
Gabbr1	145.249	-0.840201	0.316928	-2.65108	0.00802348	0.148747		NO
Gprin3	81.8562	-0.885264	0.333878	-2.65146	0.00801449	0.148747		NO
Il18rap	132.806	1.19503	0.450695	2.65153	0.00801272	0.148747		NO
Mri1	879.957	0.742532	0.280247	2.64956	0.00805957	0.148747		NO
P4ha1	4923.4	0.614318	0.231792	2.65029	0.00804219	0.148747		NO
Tppp	750.093	-1.01317	0.382153	-2.65122	0.00802019	0.148747		NO
Ccdc176	36.6466	-0.956477	0.361191	-2.64812	0.00809414	0.149187		NO
Sspn	108.011	-1.1514	0.435298	-2.64508	0.00816716	0.150332		NO
Gfpt2	191.66	-1.08806	0.411494	-2.64416	0.00818942	0.150342		NO
Sbspon	24.7042	-0.851101	0.321851	-2.6444	0.00818364	0.150342		NO
Nfib	5465.35	-0.771329	0.291908	-2.64237	0.00823269	0.150936		NO
Eno2	64.0561	-0.855061	0.323665	-2.6418	0.00824656	0.150991		NO
Pcdhb19	148.342	0.892333	0.337902	2.64081	0.00827089	0.151236		NO
1700029I15Rik	26.4903	-0.790329	0.299618	-2.63779	0.00834484	0.151843		NO
Egfl8	23.6133	-0.924732	0.35062	-2.63742	0.00835393	0.151843		NO
Mmp1a	94.7085	1.30773	0.495751	2.63787	0.00834288	0.151843		NO
Mmp3	6605.44	1.27781	0.484201	2.639	0.00831505	0.151843		NO
Pcdhb16	403.661	0.960689	0.364281	2.63722	0.00835891	0.151843		NO
Mlxipl	34.8211	-1.00175	0.380202	-2.63479	0.00841885	0.152731		NO
Slc2a9	372.888	0.790735	0.300295	2.63319	0.00845858	0.153251		NO
Itgb4	17444.3	0.88125	0.334793	2.63222	0.00848282	0.153341		NO
Pex11a	51.8718	-0.746033	0.283473	-2.63176	0.00849438	0.153341		NO
Tbc1d30	46.8036	-0.919016	0.349215	-2.63166	0.00849677	0.153341		NO
Cldn2	41.4684	-1.33716	0.508241	-2.63097	0.00851424	0.153456		NO
Ptpn13	10319.8	0.599916	0.22812	2.62983	0.00854288	0.153772		NO
Zfp51	359.222	0.451544	0.171889	2.62696	0.00861518	0.154872		NO
Angptl4	2538.92	-0.917878	0.350265	-2.62052	0.00877949	0.156884		NO
Ccdc109b	424.55	0.616524	0.235353	2.61957	0.008804	0.156884		NO
Faim2	33.4695	-1.27898	0.488258	-2.61948	0.00880645	0.156884		NO
Mlph	25.3571	-1.18062	0.450696	-2.61955	0.0088045	0.156884		NO
Tprg	128.364	-1.18869	0.453615	-2.62048	0.00878067	0.156884		NO
Tspan7	284.314	0.837774	0.319765	2.61997	0.00879379	0.156884		NO
Tyr	79.1788	1.03292	0.394039	2.62136	0.00875804	0.156884		NO
Ajap1	74.5084	1.28505	0.491095	2.61671	0.00887822	0.157151		NO
Apaf1	1649.47	0.79436	0.303465	2.61763	0.00885427	0.157151		NO
Atp6v0a4	307.852	-1.14223	0.436409	-2.61735	0.00886155	0.157151		NO
Gnb5	402.828	0.642009	0.245347	2.61673	0.00887756	0.157151		NO
Tnfaip8	2628.15	0.535347	0.204543	2.61728	0.00886325	0.157151		NO
Cpt1c	262.947	1.16827	0.44677	2.61493	0.00892464	0.15757		NO
Epdr1	106.945	-0.924889	0.353656	-2.61522	0.0089169	0.15757		NO
Mab21l3	2303.74	0.858645	0.328466	2.6141	0.00894618	0.157609		NO
S1pr5	204.337	-1.16684	0.446386	-2.61397	0.00894964	0.157609		NO
Gpat2	30.6564	-1.12268	0.429572	-2.61348	0.00896256	0.157636		NO
Pcx	1363.72	-0.766972	0.29379	-2.61061	0.00903798	0.158761		NO
5730507C01Rik	41.4736	0.854396	0.327635	2.60776	0.00911355	0.159886		NO
Lgr5	222.157	-1.10367	0.423473	-2.60623	0.00915452	0.160401		NO
6330408A02Rik	75.3904	-0.72843	0.279664	-2.60467	0.0091964	0.160931		NO
Ppp4r4	48.9495	-0.927317	0.356154	-2.6037	0.00922241	0.161183		NO
Rpl18	35702.5	0.392036	0.150612	2.60295	0.00924241	0.161328		NO
Krt75	82.025	-0.969052	0.372358	-2.60247	0.00925543	0.161352		NO
Tnfaip3	20405.6	1.01668	0.391001	2.6002	0.00931705	0.162222		NO
Fcgrt	214.853	-0.97099	0.373662	-2.59858	0.00936112	0.162785		NO
Slc25a36	1206.38	0.40471	0.155872	2.59642	0.00942013	0.163605		NO
Kng2	22.3942	-1.07363	0.413746	-2.59489	0.0094621	0.164128		NO
Adamts15	54.4107	-0.984868	0.379861	-2.59271	0.0095223	0.164682		NO
Atp7b	40.9958	0.943899	0.364217	2.59158	0.00955352	0.164682		NO
Itm2c	5345.18	0.526825	0.2032	2.59264	0.0095243	0.164682		NO
P4ha2	1122.17	0.775168	0.299072	2.59191	0.00954454	0.164682		NO
Txn1	12581.3	0.640382	0.247073	2.59187	0.00954549	0.164682		NO
Dhrs1	1377.9	0.683734	0.264007	2.58983	0.00960225	0.165316		NO
Ackr2	56.8092	-1.29893	0.501711	-2.589	0.00962557	0.165512		NO
Mitf	141.845	-1.10491	0.426841	-2.58857	0.00963761	0.165513		NO
Ralgapa2	830.803	0.513861	0.1986	2.58742	0.00966981	0.165861		NO
Gm19424	77.8174	1.08543	0.419684	2.58631	0.00970083	0.165981		NO
Pgm5	114.55	-1.30963	0.506363	-2.58634	0.00970015	0.165981		NO
Col17a1	86308.2	0.772336	0.298697	2.58569	0.00971848	0.166078		NO
BC002163	46.2942	0.929031	0.359657	2.5831	0.00979157	0.16671		NO
Galk1	337.211	-0.894881	0.3464	-2.58338	0.00978384	0.16671		NO
Zfp472	320.467	-0.741693	0.287122	-2.58319	0.00978902	0.16671		NO
Hmgcs2	402.024	-1.32951	0.51483	-2.58243	0.00981078	0.166831		NO
Spg7	1777.86	0.457523	0.177262	2.58106	0.00984988	0.167291		NO
Gm12238	105.351	0.8363	0.324406	2.57794	0.00993909	0.168599		NO
Eef1a1	462174	0.410014	0.159102	2.57706	0.00996453	0.168638		NO
Wdr45b	2629.05	0.324412	0.125887	2.57702	0.00996576	0.168638		NO
Sv2b	31.1487	-1.17433	0.455845	-2.57616	0.0099905	0.16885		NO
Pdzk1ip1	538.329	-0.962716	0.373778	-2.57564	0.0100056	0.168899		NO
Pcdhga1	22.3135	1.09311	0.424662	2.57406	0.0100512	0.169256		NO
Ptgs2	38533.4	1.23941	0.481439	2.57439	0.0100417	0.169256		NO
Dpf1	59.0027	0.819439	0.31848	2.57297	0.0100829	0.169378		NO
Tgfb1i1	68.534	-1.14438	0.444705	-2.57334	0.0100721	0.169378		NO
A330021E22Rik	240.793	1.21252	0.471677	2.57065	0.0101509	0.169535		NO
Cnn1	31.1467	-0.969455	0.377199	-2.57014	0.0101657	0.169535		NO
Col4a4	58.8869	-0.990274	0.384991	-2.5722	0.0101054	0.169535		NO
Dhrs11	88.0879	0.488512	0.189989	2.57127	0.0101327	0.169535		NO
Il10rb	609.415	0.765795	0.297919	2.57048	0.0101558	0.169535		NO
Marveld2	532.74	-0.888264	0.345504	-2.57093	0.0101427	0.169535		NO
Sdr42e1	536.037	-0.985786	0.383687	-2.56924	0.0101921	0.16977		NO
Rcor2	281.22	0.878125	0.341949	2.568	0.0102287	0.170176		NO
Fam178b	94.9737	0.945668	0.368325	2.56748	0.010244	0.170225		NO
Rgmb	949.997	0.602781	0.234864	2.56651	0.0102726	0.170496		NO
Avpi1	5246.09	0.577749	0.225244	2.565	0.0103177	0.170735		NO
Cadm1	2088.92	0.777671	0.30315	2.5653	0.0103087	0.170735		NO
Cnst	1154.48	-0.500326	0.195084	-2.56466	0.0103275	0.170735		NO
Cyp7b1	1006.88	1.08778	0.424192	2.56437	0.0103364	0.170735		NO
Myof	9865.12	0.81268	0.317017	2.56352	0.0103615	0.170947		NO
Hspa12a	52.5948	-1.16302	0.453859	-2.56252	0.0103917	0.17124		NO
Gtf3c1	6127.08	0.695436	0.271489	2.56156	0.0104202	0.171506		NO
Cacna1g	107.458	-1.03778	0.405553	-2.55892	0.0104997	0.172609		NO
Ddb1	29251.9	0.281016	0.109918	2.55659	0.0105703	0.173486		NO
Tmem120a	891.748	0.411345	0.160912	2.55634	0.0105781	0.173486		NO
Dpp7	459.765	0.551625	0.215852	2.55557	0.0106015	0.173632		NO
Gm13375	126.443	0.500308	0.195798	2.55522	0.0106121	0.173632		NO
Syne3	385.653	-0.720847	0.282192	-2.55446	0.0106353	0.173806		NO
Rnf169	1985.11	0.589287	0.231071	2.55025	0.0107647	0.175713		NO
Fam13a	119.822	-1.15388	0.452599	-2.54944	0.0107895	0.175911		NO
Cep85l	277.785	0.836076	0.328041	2.5487	0.0108127	0.176081		NO
Arhgef3	4793.79	0.723447	0.284064	2.54678	0.0108722	0.176843		NO
Rpl12	55078	0.49832	0.195733	2.54592	0.0108989	0.177069		NO
Phf19	60.0461	-0.762137	0.299482	-2.54485	0.0109325	0.177407		NO
2510009E07Rik	278.625	-0.628973	0.247242	-2.54396	0.0109604	0.177651		NO
Acot4	82.0496	-1.00872	0.396583	-2.54354	0.0109735	0.177655		NO
Chchd7	558.292	-0.449198	0.176736	-2.54163	0.0110337	0.178422		NO
C4b	116.464	-1.09816	0.432457	-2.53935	0.0111059	0.179192		NO
Rbmx	889.004	-0.51034	0.200976	-2.53931	0.0111073	0.179192		NO
Dbn1	164.59	-0.762557	0.300504	-2.5376	0.0111616	0.17986		NO
Olfr1033	120.736	1.23659	0.4877	2.53555	0.0112271	0.180495		NO
Scel	1203.27	-1.21524	0.47927	-2.53562	0.0112249	0.180495		NO
Zfp618	24.4734	-1.23765	0.488315	-2.53453	0.0112597	0.180808		NO
B4galnt1	945.382	0.689937	0.272327	2.53349	0.0112934	0.180956		NO
Snora5c	383.203	0.775883	0.306257	2.53344	0.0112951	0.180956		NO
Ahr	2996.3	-0.638062	0.252029	-2.5317	0.011351	0.181642		NO
Grcc10	1878.07	0.58358	0.230572	2.53102	0.0113733	0.181789		NO
Snx10	474.42	0.621898	0.245851	2.52957	0.0114201	0.182327		NO
6030419C18Rik	41.9457	-0.81205	0.321219	-2.52802	0.0114707	0.182923		NO
2310014L17Rik	1411.86	0.934866	0.369987	2.52675	0.0115123	0.182954		NO
Oasl1	34.405	-0.961522	0.380502	-2.52698	0.0115048	0.182954		NO
Phyhipl	31.186	1.06444	0.421135	2.52756	0.0114859	0.182954		NO
Focad	1476.44	0.481359	0.190635	2.52503	0.0115689	0.183643		NO
Ext1	4920.06	0.642443	0.254581	2.52353	0.0116182	0.184215		NO
Ccl1	33.5857	-1.25187	0.496337	-2.52221	0.011662	0.184698		NO
Gxylt2	46.9191	-1.11794	0.443404	-2.52126	0.0116934	0.184983		NO
Taf5	575.565	-0.307293	0.12194	-2.52003	0.0117345	0.185422		NO
Psapl1	1405.92	-1.13712	0.451395	-2.51913	0.0117644	0.185682		NO
Mmp10	5752.98	1.26518	0.502478	2.51788	0.0118063	0.186131		NO
Hist1h2bc	3687.92	0.599872	0.238306	2.51724	0.0118279	0.186259		NO
Nebl	421.946	-1.01182	0.402262	-2.51532	0.0118924	0.186762		NO
Pdia4	9996.71	0.39421	0.156738	2.51509	0.0119003	0.186762		NO
Tgm5	368.103	-1.19027	0.473212	-2.5153	0.011893	0.186762		NO
Pdk2	34.0616	-0.779709	0.310548	-2.51076	0.0120473	0.188855		NO
A330032B11Rik	36.1334	1.0531	0.419552	2.51006	0.0120709	0.189011		NO
Cd200	345.879	-1.1806	0.47054	-2.50904	0.012106	0.189132		NO
Krt25	113.299	1.23263	0.491199	2.50943	0.0120926	0.189132		NO
Arsb	143.525	-0.519894	0.207298	-2.50795	0.0121432	0.1895		NO
Abca7	1007.73	0.530545	0.211719	2.50589	0.0122143	0.190394		NO
Klhdc7a	30.1046	-1.25611	0.501371	-2.50535	0.012233	0.190472		NO
Dennd2a	42.2955	-0.94825	0.378618	-2.5045	0.0122624	0.190715		NO
Rps19	34199.1	0.473204	0.189099	2.50242	0.0123349	0.191627		NO
Ankrd37	229.932	0.970169	0.38783	2.50153	0.0123658	0.191628		NO
Asb1	230.669	0.587546	0.234903	2.50122	0.0123765	0.191628		NO
Rpl19	29184.9	0.438443	0.175265	2.5016	0.0123633	0.191628		NO
Vdr	1580.62	-0.643918	0.257572	-2.49995	0.0124211	0.192103		NO
Gatsl3	551.252	0.74183	0.296814	2.49931	0.0124436	0.192238		NO
Slc35g1	567.044	-0.832594	0.3332	-2.49878	0.012462	0.192307		NO
Zfp870	89.7051	-0.826226	0.330788	-2.49775	0.0124984	0.192653		NO
Mira	188.14	1.20823	0.483979	2.49646	0.0125439	0.192723		NO
Rnf144a	31.9899	-1.07352	0.429995	-2.49658	0.0125396	0.192723		NO
Wisp1	197.183	1.11561	0.446879	2.49644	0.0125447	0.192723		NO
Tshz2	138.886	-1.01386	0.406686	-2.49298	0.0126677	0.194398		NO
Pi15	8220.62	0.882707	0.354364	2.49096	0.0127398	0.195288		NO
Grn	2164.99	0.772859	0.310405	2.48984	0.0127801	0.195601		NO
Meis1	682.346	-1.03973	0.417627	-2.4896	0.0127885	0.195601		NO
Bmpr1b	179.047	0.989853	0.398044	2.4868	0.0128899	0.196851		NO
Rpl13a	81144.4	0.43599	0.175339	2.48655	0.0128987	0.196851		NO
Zfp114	21.5034	-0.827227	0.332861	-2.4852	0.0129477	0.197381		NO
B3gnt2	3162.28	0.464139	0.186919	2.4831	0.0130244	0.198113		NO
Prkcq	42.9145	-1.24436	0.501059	-2.48346	0.0130113	0.198113		NO
Mettl7b	36.0814	-1.07588	0.43344	-2.48219	0.0130577	0.198403		NO
Depdc5	1353.22	0.763265	0.307716	2.48042	0.0131228	0.199172		NO
Stk35	1021.53	0.383791	0.154846	2.47853	0.0131926	0.200012		NO
Pbld1	211.108	0.869194	0.350905	2.47701	0.0132489	0.200647		NO
Ank1	82.5323	-1.09915	0.443901	-2.47612	0.0132819	0.200708		NO
Lamp1	12940.1	0.369359	0.149165	2.47618	0.0132796	0.200708		NO
Adck5	514.566	-0.443561	0.179376	-2.4728	0.0134058	0.202359		NO
Anp32e	2032.01	-0.477754	0.193258	-2.4721	0.0134322	0.202536		NO
Scn5a	52.6889	-1.22621	0.496732	-2.46856	0.0135659	0.204329		NO
Mthfd1l	2582.47	0.764445	0.309853	2.46712	0.0136205	0.204929		NO
Snord47	95.2617	0.801692	0.32523	2.465	0.0137013	0.205921		NO
Atg13	863.542	0.609272	0.247355	2.46315	0.0137724	0.206765		NO
Gm166	41.2736	0.622286	0.25303	2.45933	0.0139196	0.208592		NO
Triqk	22.5092	-1.0435	0.424325	-2.45921	0.0139242	0.208592		NO
2005-03-01	2437.45	0.306767	0.124802	2.45803	0.0139701	0.209053		NO
Mmp2	519.177	-0.847835	0.345172	-2.45627	0.0140388	0.209854		NO
Casz1	1318.53	-0.592281	0.241292	-2.45463	0.014103	0.210587		NO
Hscb	211.808	0.670229	0.273095	2.4542	0.0141199	0.210612		NO
Mertk	132.618	-0.866596	0.353313	-2.45277	0.014176	0.211221		NO
Clhc1	65.9505	-1.0158	0.414471	-2.45084	0.0142524	0.21211		NO
Lhfpl1	167.051	0.860771	0.351265	2.45049	0.0142663	0.21211		NO
Bmp7	1241.44	-0.80459	0.328409	-2.44997	0.014287	0.212189		NO
Slc37a2	76.0866	-0.673177	0.274912	-2.4487	0.0143373	0.212708		NO
Pik3c2g	42.5529	-1.07442	0.439795	-2.44301	0.0145655	0.215843		NO
Tusc3	1405.07	0.339363	0.138932	2.44265	0.0145798	0.215843		NO
Ift22	253.922	0.434802	0.178049	2.44204	0.0146047	0.21598		NO
Krtcap3	1126.61	0.498057	0.203997	2.44149	0.0146267	0.216075		NO
Mocs3	712.284	0.802988	0.329081	2.44009	0.0146836	0.216554		NO
Zfp608	61.9774	-1.0988	0.450342	-2.43992	0.0146904	0.216554		NO
Col11a1	30.7081	-1.12304	0.460354	-2.43951	0.0147071	0.216569		NO
Slc18a1	72.9772	0.671279	0.27524	2.43889	0.0147326	0.216715		NO
Cygb	47.3152	-0.856283	0.351631	-2.43518	0.0148845	0.217333		NO
Gm6498	42.8457	0.798466	0.327847	2.43548	0.0148719	0.217333		NO
Lmln	113.396	-0.553653	0.227293	-2.43586	0.0148565	0.217333		NO
Rapgef1	2879.46	0.546069	0.224141	2.43627	0.0148395	0.217333		NO
Tceal1	31.0091	-0.891803	0.366064	-2.43619	0.0148427	0.217333		NO
Tep1	920.689	0.648159	0.26604	2.43632	0.0148374	0.217333		NO
Zfp809	477.155	0.420616	0.17268	2.43581	0.0148585	0.217333		NO
Slc43a1	85.8251	-1.1118	0.456767	-2.43406	0.0149307	0.217777		NO
Zbed5	379.365	0.837587	0.344312	2.43264	0.0149891	0.218399		NO
Arhgap33	50.6142	-0.996134	0.409694	-2.43141	0.0150403	0.218869		NO
Slc7a2	336.158	-1.02159	0.420284	-2.43072	0.0150688	0.218869		NO
Snord104	276.67	0.506403	0.208314	2.43095	0.0150591	0.218869		NO
Fat4	145.094	-0.754754	0.310618	-2.42985	0.0151052	0.219168		NO
Ppfia4	35.809	-0.993491	0.409009	-2.42902	0.0151397	0.219438		NO
Eef2	159512	0.460992	0.189936	2.42709	0.0152204	0.220378		NO
Notch1	7450.41	0.7235	0.298583	2.42311	0.0153883	0.222575		NO
Xkr5	22.0528	-0.887092	0.366188	-2.42251	0.0154138	0.222712		NO
Rabep1	2135.29	-0.332378	0.137227	-2.42209	0.0154314	0.222733		NO
Clmn	83.3865	-0.743808	0.307333	-2.4202	0.015512	0.223663		NO
Fau	27926.3	0.43563	0.18003	2.41976	0.0155307	0.2237		NO
Cdk6	1274.31	0.592201	0.244774	2.41938	0.0155471	0.223703		NO
Chsy3	55.2515	-1.03021	0.426061	-2.41799	0.0156067	0.224327		NO
Mfsd7a	277.578	-0.879927	0.36412	-2.41659	0.0156668	0.224726		NO
Slc30a2	34.2373	1.11456	0.461141	2.41695	0.0156512	0.224726		NO
Ackr4	666.775	-1.21186	0.501741	-2.41532	0.0157215	0.224814		NO
Cln3	394.773	0.818412	0.338825	2.41544	0.0157161	0.224814		NO
Il12rb1	33.6124	-1.09582	0.453698	-2.41531	0.0157217	0.224814		NO
Aspg	162.571	-0.875757	0.362944	-2.41293	0.0158249	0.225127		NO
Eml2	1166.79	0.354058	0.146704	2.41341	0.0158039	0.225127		NO
Pdss1	505.626	-0.680181	0.281861	-2.41318	0.015814	0.225127		NO
Reep2	63.9243	1.15571	0.478911	2.41321	0.0158128	0.225127		NO
Tjp3	136.217	-1.09272	0.452631	-2.41416	0.0157715	0.225127		NO
Mid1	343.359	0.604099	0.250523	2.41135	0.0158934	0.225869		NO
Ephb4	2891.35	0.611351	0.253687	2.40986	0.0159584	0.226561		NO
Tada1	968.417	-0.484002	0.200903	-2.40913	0.0159908	0.226787		NO
Adcy1	209.909	-1.12496	0.467348	-2.40711	0.0160792	0.227176		NO
Homer3	610.535	0.56612	0.235196	2.40701	0.0160838	0.227176		NO
Synpo2	42.7647	-1.07316	0.445687	-2.40788	0.0160455	0.227176		NO
Wdr34	400.47	0.602453	0.250279	2.40712	0.0160788	0.227176		NO
Fam49a	444.411	0.631375	0.262504	2.4052	0.0161637	0.227607		NO
Gm5478	120.296	0.655199	0.272384	2.40542	0.0161538	0.227607		NO
Mcam	1731.07	1.11347	0.462843	2.40573	0.0161404	0.227607		NO
Kif26a	1251.94	1.0223	0.425334	2.40352	0.0162382	0.228424		NO
Npdc1	237.015	0.686482	0.285715	2.40268	0.0162754	0.228715		NO
Zfp334	59.6026	-0.875756	0.364603	-2.40194	0.0163082	0.228944		NO
Sdc3	177.79	-0.727619	0.303236	-2.39951	0.0164169	0.230236		NO
4930539J05Rik	144.905	0.54057	0.225376	2.39853	0.0164612	0.230624		NO
Klf3	1882.7	0.494778	0.206323	2.39808	0.0164815	0.230674		NO
Csf2ra	136.604	0.856576	0.357794	2.39405	0.0166634	0.232985		NO
Zfp827	394.237	-0.680667	0.284379	-2.39352	0.0166876	0.233087		NO
Mrpl52	1244.4	0.400998	0.167682	2.39142	0.0167835	0.233955		NO
Ttll7	894.964	0.678357	0.283659	2.39145	0.0167818	0.233955		NO
Plin2	12102.1	-0.946788	0.395981	-2.39099	0.0168028	0.233988		NO
2810055G20Rik	70.4698	-0.984145	0.411935	-2.38908	0.0168907	0.234512		NO
Elovl7	1412.99	-0.465519	0.194879	-2.38876	0.0169053	0.234512		NO
Reep6	36.6583	-1.02575	0.429418	-2.3887	0.0169082	0.234512		NO
Rplp0	119524	0.399145	0.167033	2.38961	0.0168661	0.234512		NO
Fam46a	2975.93	0.836552	0.350282	2.38822	0.0169301	0.234581		NO
Bax	1185.41	0.758332	0.317835	2.38593	0.0170358	0.235809		NO
Adamtsl1	158.722	-1.1661	0.489295	-2.38323	0.0171616	0.236795		NO
Egln3	2933.27	0.749464	0.314522	2.38286	0.0171785	0.236795		NO
Golgb1	2567.38	0.277921	0.116648	2.38256	0.0171925	0.236795		NO
Tmem160	378.856	0.58662	0.246159	2.3831	0.0171677	0.236795		NO
Uap1l1	373.065	0.566541	0.237687	2.38356	0.0171463	0.236795		NO
Kif7	222.132	-0.678722	0.284958	-2.38183	0.017227	0.237033		NO
Trp53inp1	4480.94	0.747649	0.314032	2.3808	0.0172749	0.237221		NO
Vash1	89.8925	-0.836577	0.351337	-2.38112	0.0172599	0.237221		NO
Mef2a	3629.08	0.418234	0.1758	2.37904	0.017358	0.237891		NO
Tnk1	826.275	-0.741717	0.311761	-2.37912	0.0173541	0.237891		NO
Cd101	60.8956	0.708027	0.29772	2.37816	0.0173991	0.237924		NO
Samd14	33.7009	-0.652485	0.274339	-2.37839	0.0173884	0.237924		NO
Sphk1	513.798	-0.685208	0.288158	-2.37789	0.017412	0.237924		NO
Daam2	84.0562	-0.883309	0.371533	-2.37747	0.0174319	0.237961		NO
Ptch2	108.73	-0.740886	0.311729	-2.3767	0.0174684	0.23799		NO
Snora21	417.778	0.765739	0.322185	2.3767	0.0174682	0.23799		NO
Epha8	36.5549	-1.21245	0.510341	-2.37576	0.017513	0.238249		NO
Rps6ka5	681.125	0.864876	0.364071	2.37557	0.0175219	0.238249		NO
Cpped1	701.643	0.783917	0.330263	2.37362	0.0176149	0.239279		NO
Cited1	75.8674	1.18733	0.500919	2.3703	0.0177735	0.239786		NO
Cpeb1	51.5006	-1.03559	0.436727	-2.37125	0.017728	0.239786		NO
Galnt16	26.3091	-1.14347	0.482323	-2.37076	0.0177516	0.239786		NO
Gm13178	41.1907	-1.21251	0.511296	-2.37145	0.0177184	0.239786		NO
Rasl11a	132.817	-0.75109	0.316666	-2.37186	0.0176986	0.239786		NO
Rhbdl3	353.61	-0.771911	0.325498	-2.37148	0.017717	0.239786		NO
Whsc1	2734.35	-0.383167	0.161633	-2.3706	0.0177593	0.239786		NO
Snora28	565.456	0.649373	0.274123	2.36891	0.0178406	0.240224		NO
Tymp	25.951	0.667543	0.281751	2.36927	0.0178233	0.240224		NO
Bloc1s1	765.706	0.513718	0.216937	2.36805	0.0178821	0.240548		NO
Sphkap	35.2838	-1.1045	0.466686	-2.3667	0.0179476	0.241195		NO
Aaas	799.782	0.653608	0.276404	2.36469	0.0180454	0.241525		NO
Cacna1a	82.878	-0.641077	0.271147	-2.36432	0.0180633	0.241525		NO
Mxi1	2248.43	0.584585	0.247282	2.36404	0.0180769	0.241525		NO
Pde4a	34.3302	-1.05615	0.446649	-2.36462	0.0180486	0.241525		NO
Rgs7bp	60.4021	1.19126	0.503619	2.3654	0.0180105	0.241525		NO
Tslp	3809.14	1.21283	0.512769	2.36527	0.0180172	0.241525		NO
Clta	4930.55	0.322107	0.136294	2.36332	0.0181119	0.241528		NO
Gpx7	26.9661	-1.01023	0.427443	-2.36343	0.0181066	0.241528		NO
Il2rg	193.665	1.06306	0.450017	2.36227	0.0181633	0.241904		NO
Krt28	64.6471	-1.2262	0.519129	-2.36203	0.0181752	0.241904		NO
Timp3	2343.29	-0.637213	0.26989	-2.36101	0.018225	0.242335		NO
H2-M2	73.7317	1.09327	0.463465	2.35891	0.0183287	0.24348		NO
Cpeb3	293.205	0.95913	0.40671	2.35827	0.0183605	0.243668		NO
Arhgef37	381.076	-0.452623	0.191981	-2.35765	0.0183912	0.243841		NO
Cyb5d2	186.324	0.366733	0.155627	2.35649	0.0184487	0.244326		NO
Gpr137	448.222	0.534718	0.226941	2.3562	0.018463	0.244326		NO
Kdm1b	2038.1	0.571919	0.242981	2.35376	0.0185846	0.245573		NO
Mtor	2472.58	0.447455	0.190115	2.3536	0.0185927	0.245573		NO
Cfl2	1166.62	-0.404768	0.172006	-2.35323	0.0186114	0.245585		NO
Sulf2	1051.52	1.01318	0.430649	2.35268	0.0186387	0.245711		NO
Tbx1	397.793	-0.934774	0.397972	-2.34884	0.0188318	0.248021		NO
Mmp12	1732.68	1.19097	0.507163	2.34829	0.0188598	0.248153		NO
Zfhx4	63.2581	-1.0409	0.443827	-2.34529	0.0190125	0.249925		NO
Clpb	1920.79	0.571812	0.243869	2.34475	0.0190396	0.250044		NO
Trpv2	106.715	-1.01254	0.432023	-2.34371	0.0190931	0.250509		NO
Atp8a1	847.421	-0.682979	0.291547	-2.3426	0.0191498	0.250541		NO
Fbxo4	371.336	0.500822	0.213758	2.34294	0.0191326	0.250541		NO
Rian	148.452	-1.15581	0.493241	-2.34329	0.0191146	0.250541		NO
Camk2n2	22.704	-0.688583	0.294045	-2.34176	0.019193	0.250869		NO
Usp18	182.781	-1.04249	0.445352	-2.34083	0.019241	0.251022		NO
Zfp14	39.5109	-0.918884	0.392546	-2.34083	0.0192409	0.251022		NO
Clec2f	1116.03	1.0248	0.438151	2.33893	0.0193393	0.252066		NO
Kcnq4	68.2437	1.07264	0.458852	2.33767	0.0194046	0.252621		NO
Mir3068	50.8949	0.764917	0.327251	2.3374	0.0194184	0.252621		NO
Klhl17	387.8	-0.568441	0.243279	-2.33659	0.0194608	0.252935		NO
Snhg8	1759.15	0.590084	0.252603	2.33602	0.0194904	0.253082		NO
Glyat	31.8273	0.985629	0.42233	2.33379	0.0196069	0.254357		NO
Sorbs2	44.2368	-0.961088	0.411946	-2.33304	0.0196459	0.254624		NO
Rpl14-ps1	167.217	-0.76327	0.327295	-2.33205	0.019698	0.255061		NO
Rpl28	13358.8	0.486898	0.208958	2.33012	0.0197998	0.255895		NO
Spg11	1162.18	0.703145	0.301799	2.32985	0.0198143	0.255895		NO
Zswim1	87.7992	-0.548137	0.235275	-2.32978	0.0198179	0.255895		NO
A230046K03Rik	4883.28	0.492274	0.211363	2.32904	0.019857	0.256161		NO
Ciita	97.9174	-1.07179	0.460723	-2.32633	0.0200011	0.25778		NO
Rasgrf1	36.2731	-1.1619	0.499833	-2.32457	0.0200948	0.258746		NO
Snx24	179.463	0.728583	0.313576	2.32347	0.0201541	0.259268		NO
Ly6c1	1214.89	1.10367	0.475254	2.32226	0.0202188	0.259618		NO
Tfpi2	68.2361	-1.18341	0.50959	-2.32227	0.0202185	0.259618		NO
Irgm2	125.949	-1.12118	0.4829	-2.32176	0.0202461	0.259728		NO
Adat2	199.662	0.444678	0.191655	2.3202	0.0203303	0.260087		NO
C1rl	53.7997	0.98601	0.425223	2.31881	0.0204056	0.260087		NO
Hacl1	216.112	-0.721798	0.311216	-2.31928	0.0203798	0.260087		NO
Hsd17b11	55.2951	-1.03869	0.447705	-2.32003	0.0203393	0.260087		NO
Naglu	188.201	0.648956	0.279634	2.32073	0.0203014	0.260087		NO
Ptgs2os	25.8504	0.998768	0.430697	2.31896	0.0203973	0.260087		NO
Timm9	475.585	-0.372183	0.160458	-2.31951	0.0203673	0.260087		NO
Adamtsl2	32.0426	-1.11946	0.482964	-2.31788	0.0204556	0.260324		NO
Prkdc	1857.63	0.385952	0.166519	2.31777	0.0204618	0.260324		NO
Acbd6	1020.94	-0.457845	0.197663	-2.31629	0.0205425	0.260486		NO
Ahcy	8992.34	0.534489	0.230757	2.31625	0.0205449	0.260486		NO
Rpl18a	19638.7	0.510834	0.220553	2.31615	0.0205498	0.260486		NO
Slc23a1	112.532	0.731178	0.315596	2.31682	0.0205136	0.260486		NO
Hoxa9	86.591	1.0844	0.468289	2.31566	0.0205771	0.260593		NO
Lix1l	122.967	0.823197	0.355581	2.31508	0.0206087	0.260755		NO
Hpgds	277.617	0.909905	0.393189	2.31417	0.0206586	0.261067		NO
Tcf24	39.9041	-0.955161	0.412786	-2.31394	0.0206711	0.261067		NO
Rsad2	131.923	-1.02075	0.441256	-2.31328	0.0207073	0.261286		NO
Rnf125	96.6378	-0.894941	0.387041	-2.31226	0.0207632	0.261752		NO
Mmp13	10729.5	1.14956	0.497381	2.31123	0.0208203	0.262234		NO
Snord70	23.9589	-0.811068	0.351166	-2.30964	0.0209079	0.263097		NO
Ggt5	97.3502	-0.769698	0.333503	-2.30792	0.0210035	0.264061		NO
Aim1l	1118.35	-0.820844	0.355895	-2.30642	0.021087	0.26487		NO
Lin7b	26.7098	-0.656843	0.284848	-2.30594	0.0211139	0.264967		NO
Gstk1	250.953	0.713019	0.309389	2.3046	0.0211889	0.265187		NO
Hist1h3g	660.265	-0.704213	0.305524	-2.30494	0.0211701	0.265187		NO
Ncam1	261.962	-1.1576	0.502209	-2.30502	0.0211653	0.265187		NO
Ctu1	377.187	-0.541191	0.234921	-2.30371	0.0212387	0.265338		NO
Scarna8	37.3874	0.751829	0.326357	2.3037	0.0212393	0.265338		NO
A530013C23Rik	56.0431	-0.669745	0.290858	-2.30265	0.0212986	0.265366		NO
Lhx2	159.421	-1.12291	0.487661	-2.30264	0.0212991	0.265366		NO
Srgap1	64.2395	-0.902526	0.391891	-2.303	0.0212787	0.265366		NO
Sorcs2	2057.93	0.625036	0.271504	2.30213	0.0213281	0.265489		NO
Xlr3b	73.5611	-1.20734	0.524685	-2.30107	0.0213878	0.265992		NO
Ccdc27	44.6773	-0.933045	0.405816	-2.29918	0.0214947	0.26613		NO
Cnih2	42.8942	-0.671769	0.292131	-2.29954	0.0214742	0.26613		NO
Ehbp1l1	1531.69	0.612407	0.266315	2.29956	0.021473	0.26613		NO
Slc15a3	56.3196	-1.02451	0.4456	-2.29918	0.021495	0.26613		NO
Steap4	2602.15	-0.923961	0.401845	-2.2993	0.021488	0.26613		NO
Qars	7120.34	0.396043	0.172339	2.29804	0.0215594	0.266689		NO
C130074G19Rik	54.3186	-0.877863	0.382183	-2.29697	0.0216206	0.267025		NO
Itga6	42419.3	0.650297	0.283121	2.29689	0.0216251	0.267025		NO
Cpne2	763.011	0.641479	0.279399	2.29592	0.0216802	0.267274		NO
Nr4a1	9904.71	0.848957	0.369778	2.29586	0.0216839	0.267274		NO
Aoc3	44.7615	-1.0516	0.458278	-2.29468	0.0217515	0.267757		NO
Armc8	827.789	-0.303669	0.132386	-2.29383	0.0218005	0.267757		NO
Ddit3	1011.36	0.852142	0.371403	2.29439	0.0217683	0.267757		NO
Myb	87.2586	-0.763381	0.332795	-2.29385	0.0217992	0.267757		NO
Macf1	24663.2	0.53419	0.233394	2.28879	0.0220914	0.27109		NO
Adpgk	1258.15	0.404295	0.176736	2.28757	0.0221628	0.271288		NO
Aldh1l1	1613.3	0.708204	0.309638	2.2872	0.0221843	0.271288		NO
Nrxn3	28.8304	-1.11386	0.487002	-2.28717	0.022186	0.271288		NO
Zfp273	36.4617	-0.894739	0.391073	-2.28791	0.022143	0.271288		NO
1600016N20Rik	73.3175	0.65791	0.287708	2.28673	0.0222118	0.271365		NO
Gp49a	26.957	1.15771	0.506594	2.28529	0.0222959	0.271911		NO
Traip	375.968	-0.644959	0.282221	-2.28529	0.0222955	0.271911		NO
Atp10a	638.763	-0.555528	0.243195	-2.28429	0.0223547	0.272149		NO
Vat1	2024.75	-0.599378	0.262372	-2.28446	0.0223446	0.272149		NO
Snrpg	4185.45	0.434146	0.19014	2.28329	0.022413	0.27262		NO
Bag4	1231.11	-0.525509	0.230268	-2.28216	0.0224796	0.273189		NO
Bcl2l15	382.641	1.03642	0.454349	2.2811	0.0225426	0.273715		NO
Fam198b	218.201	1.02686	0.45034	2.28018	0.0225969	0.274133		NO
C920006O11Rik	46.9464	0.746384	0.327687	2.27773	0.0227424	0.274217		NO
Chd3	4145.44	0.613282	0.269213	2.27806	0.0227231	0.274217		NO
Dcbld1	358.845	-0.548823	0.240908	-2.27814	0.0227182	0.274217		NO
Grem1	142.242	-1.09882	0.482097	-2.27925	0.0226524	0.274217		NO
Hoxa5	96.0741	1.16522	0.511456	2.27825	0.0227117	0.274217		NO
Iigp1	343.002	-1.16727	0.512468	-2.27774	0.0227423	0.274217		NO
Txndc17	5301.25	0.493723	0.216702	2.27835	0.0227059	0.274217		NO
Ces2f	214.658	0.896489	0.393671	2.27725	0.022771	0.274322		NO
Zfp72	28.8846	-0.809145	0.355403	-2.2767	0.0228042	0.274483		NO
Atp2b2	124.22	-1.18793	0.522049	-2.27551	0.0228756	0.274864		NO
Dclre1c	1431.9	0.669668	0.294293	2.27551	0.0228753	0.274864		NO
Fuca1	1205.88	0.447112	0.196563	2.27464	0.0229273	0.275247		NO
Fbxl8	85.4534	0.646631	0.284431	2.27342	0.0230009	0.275891		NO
Hivep3	159.824	-0.97519	0.42926	-2.27179	0.023099	0.27635		NO
Serping1	80.553	-0.940839	0.414086	-2.27208	0.0230815	0.27635		NO
Vkorc1	680.691	0.572592	0.252025	2.27196	0.0230887	0.27635		NO
Atp6v1f	1958.04	0.451476	0.19877	2.27135	0.023126	0.276433		NO
Kif26b	568.885	-0.746655	0.328851	-2.2705	0.0231776	0.276811		NO
Tacc1	549.463	-0.688942	0.303662	-2.26878	0.0232817	0.277814		NO
Rhob	8463.99	0.694905	0.306524	2.26705	0.0233871	0.278832		NO
Ncald	54.5648	-1.00365	0.443106	-2.26503	0.0235108	0.280066		NO
Il22ra2	100.509	-1.16437	0.514432	-2.26341	0.0236105	0.280529		NO
Ly6a	5633.98	0.80022	0.353507	2.26366	0.0235951	0.280529		NO
Pknox2	24.2484	-0.978297	0.432133	-2.26388	0.0235815	0.280529		NO
Vcam1	151.207	0.962516	0.425336	2.26295	0.0236386	0.280622		NO
Clec2l	46.1707	0.785522	0.34718	2.26258	0.0236618	0.280657		NO
Gm14420	616.204	-0.609305	0.269507	-2.26082	0.0237707	0.281139		NO
Gm9776	39.2956	0.594146	0.262772	2.26107	0.023755	0.281139		NO
Npbwr1	67.9596	-1.17594	0.520186	-2.26061	0.0237837	0.281139		NO
Skint5	42.924	-1.17272	0.518546	-2.26156	0.0237243	0.281139		NO
Sgcd	39.3596	-1.01428	0.448761	-2.26018	0.0238098	0.281207		NO
Agmo	75.2338	-0.88963	0.39375	-2.25938	0.0238599	0.28156		NO
Wdr35	1319.71	0.684334	0.302988	2.25862	0.0239072	0.281876		NO
Fbxo25	471.14	0.556738	0.246701	2.25674	0.0240245	0.283019		NO
4930577N17Rik	43.2167	0.527955	0.234106	2.25519	0.0241211	0.283518		NO
B4galt2	170.557	0.634061	0.28117	2.25508	0.0241283	0.283518		NO
Cep112	29.9516	-0.952501	0.422314	-2.25543	0.0241063	0.283518		NO
Fcamr	132.041	0.894216	0.396863	2.25321	0.0242459	0.284658		NO
2900076A07Rik	102.164	-0.667443	0.296369	-2.25207	0.0243178	0.28526		NO
BC021614	188.176	0.888537	0.394753	2.25087	0.0243939	0.285668		NO
Rnaset2b	397.528	0.609867	0.270939	2.25094	0.0243893	0.285668		NO
Robo1	1737.48	0.535263	0.237932	2.24965	0.0244712	0.286332		NO
Cenpk	186.052	-0.619576	0.27557	-2.24834	0.0245543	0.286487		NO
Efhd2	2662.96	-0.702115	0.312475	-2.24695	0.0246434	0.286487		NO
Gm15663	26.1842	0.877223	0.390481	2.24652	0.0246707	0.286487		NO
Naa50	4379.42	-0.40373	0.179693	-2.24677	0.0246547	0.286487		NO
Sfxn5	321.462	0.719312	0.319862	2.24882	0.0245237	0.286487		NO
Tmem116	22.9947	-0.841952	0.374764	-2.24662	0.0246643	0.286487		NO
Tmtc3	1509.57	0.58887	0.262001	2.24759	0.0246025	0.286487		NO
Tnik	1237	0.623111	0.277207	2.24782	0.0245875	0.286487		NO
Zfp612	83.6455	-0.622111	0.27692	-2.24654	0.0246697	0.286487		NO
Kif5a	56.6379	-0.937028	0.417461	-2.24459	0.0247945	0.28723		NO
Marcks	3217.01	-0.535966	0.238769	-2.24471	0.0247867	0.28723		NO
Myo5a	5338.32	0.528512	0.235493	2.24428	0.0248143	0.28723		NO
Rpl27a	32995.1	0.396381	0.176622	2.24423	0.0248177	0.28723		NO
Asap3	184.389	-0.598106	0.266616	-2.24332	0.0248759	0.287423		NO
Fermt2	380.95	-0.854702	0.380971	-2.24349	0.0248655	0.287423		NO
Fastkd5	373.458	-0.304858	0.135946	-2.2425	0.0249291	0.287797		NO
Plce1	57.0346	-1.02663	0.457905	-2.24201	0.0249607	0.287922		NO
Cbr1	584.935	-0.648432	0.289334	-2.24112	0.0250181	0.288343		NO
Mvp	5074.07	0.323776	0.1446	2.23912	0.0251481	0.289601		NO
Zfp11	49.3248	-0.652648	0.291577	-2.23834	0.0251988	0.289943		NO
Kcnn3	22.2662	-1.06016	0.473992	-2.23665	0.025309	0.29097		NO
Cd44	33397.4	0.775336	0.346716	2.23622	0.0253371	0.291051		NO
Ulbp1	190.382	0.711581	0.318361	2.23514	0.0254084	0.291628		NO
Chil4	5774.9	1.03854	0.464883	2.23398	0.0254846	0.292018		NO
Zcchc8	690.231	-0.392626	0.175744	-2.23408	0.0254779	0.292018		NO
Dnah11	44.0854	-1.07393	0.480983	-2.23278	0.0255635	0.292679		NO
Praf2	116.159	0.660405	0.296091	2.23041	0.0257202	0.294231		NO
Snph	26.3833	-0.970919	0.435461	-2.22964	0.0257715	0.294574		NO
Dnd1	52.1414	-0.677047	0.303772	-2.2288	0.0258274	0.29497		NO
Rinl	31.3191	-0.769904	0.345972	-2.22534	0.0260584	0.297363		NO
Nrip2	27.7614	-0.723547	0.325264	-2.22449	0.0261157	0.29777		NO
Gmip	426.643	0.393043	0.176907	2.22174	0.0263007	0.299633		NO
Cacna1e	53.6781	-1.03271	0.465091	-2.22044	0.0263888	0.30029		NO
Oas3	160.934	-0.865878	0.389991	-2.22025	0.0264017	0.30029		NO
Fnip2	2052.33	0.577717	0.260309	2.21935	0.0264628	0.300738		NO
Papln	814.112	0.578032	0.260489	2.21902	0.0264851	0.300743		NO
C330006A16Rik	1343.07	0.561457	0.253096	2.21836	0.0265303	0.300857		NO
Card14	92.0271	-0.796809	0.359208	-2.21824	0.0265386	0.300857		NO
Ralgps2	1488.95	-0.510573	0.230276	-2.21722	0.0266081	0.301042		NO
Sepw1	1740.95	0.527332	0.237854	2.21704	0.0266201	0.301042		NO
Tbcel	344.277	0.596407	0.268995	2.21717	0.0266116	0.301042		NO
Nudt8	486.849	0.447274	0.201845	2.21593	0.0266966	0.301661		NO
Phf20l1	3393.18	0.398412	0.179873	2.21497	0.0267625	0.302158		NO
Rasal1	45.2708	-0.993562	0.44865	-2.21456	0.0267905	0.302229		NO
Bst2	222.289	-0.653539	0.29528	-2.21329	0.0268778	0.302966		NO
2010109I03Rik	168.969	1.06433	0.481036	2.21257	0.0269273	0.303277		NO
Mex3a	287.57	-0.622971	0.281817	-2.21055	0.027067	0.304333		NO
Notch4	65.5501	-0.724786	0.327868	-2.2106	0.0270634	0.304333		NO
Sox11	641.584	-1.16481	0.527	-2.21026	0.027087	0.304333		NO
Pak3	477.552	-0.565541	0.255965	-2.20945	0.0271434	0.304472		NO
Pappa	667.773	-1.06839	0.483526	-2.20959	0.0271337	0.304472		NO
4933400F21Rik	34.3289	-0.596647	0.270092	-2.20905	0.0271711	0.304535		NO
Pitpnm2	534.417	0.479239	0.216974	2.20874	0.027193	0.304535		NO
Pramef12	31.5562	-0.91047	0.412461	-2.20741	0.0272856	0.305325		NO
Dlg4	42.5361	-0.803034	0.36412	-2.20541	0.0274253	0.305946		NO
Pkib	32.1533	-1.1303	0.512404	-2.20587	0.027393	0.305946		NO
Stxbp2	1845.7	0.326517	0.148055	2.20537	0.0274282	0.305946		NO
Taok2	2028.48	0.66982	0.303725	2.20535	0.0274295	0.305946		NO
Shisa5	3024.98	0.471788	0.214002	2.20459	0.0274828	0.306294		NO
Gpr98	59.5201	-0.850754	0.386183	-2.20298	0.0275961	0.307309		NO
Fbxo17	75.2929	0.719248	0.327139	2.1986	0.0279061	0.309765		NO
Mamld1	37.9736	-0.907666	0.412784	-2.19889	0.027886	0.309765		NO
Sqle	4864.05	0.60851	0.276727	2.19895	0.0278813	0.309765		NO
Tmem163	25.4326	0.927946	0.421945	2.19921	0.0278628	0.309765		NO
Ankrd35	404.359	-1.09252	0.497205	-2.19732	0.0279977	0.309788		NO
Entpd7	480.375	0.73026	0.332222	2.19811	0.0279411	0.309788		NO
Mrvi1	37.4185	-0.99062	0.450815	-2.1974	0.0279921	0.309788		NO
Tgm7	33.3944	-1.14641	0.5216	-2.19787	0.0279586	0.309788		NO
Arpc2	7282.86	0.41965	0.1912	2.19482	0.0281767	0.311271		NO
Creg1	565.239	-0.643325	0.29307	-2.19513	0.0281544	0.311271		NO
Adnp2	1638.95	0.6516	0.297	2.19394	0.0282399	0.311648		NO
Ndc80	497.558	-0.501511	0.228645	-2.1934	0.0282784	0.311648		NO
Scoc	473.526	0.492308	0.224426	2.19363	0.0282619	0.311648		NO
Alad	731.376	-0.540708	0.246616	-2.19251	0.028343	0.312111		NO
Pld3	1451.29	0.438902	0.200272	2.19153	0.0284135	0.312639		NO
Rbks	75.2865	0.711418	0.324706	2.19096	0.0284548	0.312844		NO
Angptl1	30.9686	-0.644675	0.294345	-2.1902	0.0285096	0.31295		NO
Jdp2	372.994	0.61512	0.280835	2.19032	0.0285007	0.31295		NO
Gjb5	234.508	-0.797866	0.364709	-2.18768	0.0286931	0.314011		NO
Lrrc75b	33.1172	-0.888722	0.40625	-2.18762	0.028697	0.314011		NO
Nid1	484.773	-0.76606	0.350076	-2.18827	0.02865	0.314011		NO
Ttyh2	487.145	-0.653574	0.298705	-2.18802	0.0286679	0.314011		NO
Rps25	25278.9	0.385758	0.176523	2.18531	0.0288661	0.315612		NO
Aldoa	30158.6	0.581607	0.266963	2.1786	0.0293612	0.316352		NO
Bai1	140.743	-0.959742	0.439815	-2.18215	0.0290984	0.316352		NO
Bre	446.182	0.497875	0.22842	2.17965	0.0292837	0.316352		NO
Ccdc28b	119.097	-0.906868	0.416279	-2.17851	0.029368	0.316352		NO
Col9a2	39.411	-1.01296	0.464708	-2.17977	0.0292746	0.316352		NO
Dapk3	943.87	0.24393	0.11172	2.18341	0.0290056	0.316352		NO
Elmod1	59.1746	-0.910195	0.417206	-2.18165	0.0291356	0.316352		NO
Eya1	21.8853	-1.0044	0.460935	-2.17904	0.0293288	0.316352		NO
Gnat2	29.1243	0.751238	0.344439	2.18105	0.0291799	0.316352		NO
Kcnip3	57.8114	-0.837392	0.384236	-2.17937	0.0293043	0.316352		NO
Metap1	3894.28	-0.374325	0.171782	-2.17907	0.0293264	0.316352		NO
Pcdhgc3	1331.15	0.460749	0.211079	2.18282	0.0290489	0.316352		NO
Pfkfb3	1334.52	0.703234	0.322744	2.17892	0.0293375	0.316352		NO
Rnf180	25.6724	-0.860556	0.394356	-2.18218	0.0290964	0.316352		NO
Snrpf	45.4433	0.603897	0.276788	2.1818	0.0291242	0.316352		NO
Spata13	116.497	-0.872567	0.400134	-2.18069	0.0292066	0.316352		NO
Tmem98	260.176	-0.851749	0.390059	-2.18364	0.0289886	0.316352		NO
Tnxb	283.891	-1.03205	0.473221	-2.18091	0.0291901	0.316352		NO
Trib2	544.562	-0.899153	0.412648	-2.17898	0.029333	0.316352		NO
Camk2b	88.3966	-0.7884	0.36196	-2.17814	0.0293954	0.3164		NO
Snord16a	142.681	0.72129	0.331197	2.17782	0.0294191	0.316409		NO
Bco2	76.0714	0.985962	0.452906	2.17697	0.0294829	0.31685		NO
Uba52	24334.1	0.431952	0.198628	2.17467	0.0296546	0.318201		NO
Znrf3	621.03	-0.300957	0.13838	-2.17486	0.0296408	0.318201		NO
Trmt61a	702.548	-0.454544	0.209064	-2.17418	0.0296915	0.31835		NO
Bbc3	479.796	0.649458	0.299207	2.17059	0.0299619	0.318761		NO
Dyrk2	801.786	0.405541	0.186723	2.17188	0.0298647	0.318761		NO
Glud1	4845.45	0.314011	0.144684	2.17031	0.0299832	0.318761		NO
Lphn1	738.461	-0.410334	0.188942	-2.17174	0.0298754	0.318761		NO
Map2	200.576	-0.856361	0.394106	-2.17292	0.0297863	0.318761		NO
Mex3b	428.859	1.03	0.474172	2.17221	0.0298399	0.318761		NO
Omd	981.369	0.664715	0.306125	2.17139	0.029902	0.318761		NO
Pcdhb20	95.7809	0.456834	0.210388	2.17139	0.0299018	0.318761		NO
Pros1	2477.14	0.595188	0.274215	2.17052	0.0299676	0.318761		NO
Ric3	105.085	-0.659249	0.303676	-2.1709	0.0299389	0.318761		NO
Wbp1	597.576	0.5859	0.269947	2.17042	0.0299747	0.318761		NO
9430083A17Rik	73.217	0.661066	0.304668	2.16979	0.0300225	0.31878		NO
Serpine1	7778.82	0.921443	0.42469	2.16968	0.030031	0.31878		NO
4933433G15Rik	36.4114	0.731618	0.337552	2.16742	0.0302027	0.319623		NO
Fut10	101.509	-0.817812	0.377282	-2.16764	0.0301859	0.319623		NO
Gm6623	85.8068	0.902468	0.416254	2.16807	0.0301534	0.319623		NO
Wnt5b	146.109	-0.761417	0.35123	-2.16786	0.0301694	0.319623		NO
Muc1	40.0406	-0.582447	0.268958	-2.16557	0.0303443	0.320728		NO
Tmeff1	624.917	-0.635943	0.293678	-2.16545	0.0303536	0.320728		NO
Clca2	5569.22	-1.03199	0.476958	-2.16369	0.0304882	0.321905		NO
Gprc5c	221.612	-1.02254	0.472798	-2.16274	0.0305614	0.322432		NO
Sorbs3	47.8433	-0.763691	0.353177	-2.16234	0.0305916	0.322505		NO
Rps11	26233.6	0.337629	0.156193	2.16161	0.0306483	0.322857		NO
Stmn1	3967.28	-0.481091	0.222595	-2.16128	0.0306735	0.322876		NO
Pyy	44.0117	-1.13325	0.524416	-2.16098	0.0306971	0.322879		NO
Chmp1b	2377.25	0.566831	0.262382	2.16033	0.0307474	0.322917		NO
Tspan8	70.8094	-0.847288	0.392188	-2.16041	0.0307407	0.322917		NO
Pik3r3	301.062	0.781185	0.361677	2.1599	0.0307807	0.323022		NO
Ascc1	419.517	0.460058	0.213135	2.15853	0.0308864	0.323886		NO
Cilp	139.275	-0.949427	0.439959	-2.15799	0.0309285	0.324082		NO
A730085K08Rik	43.4513	0.909344	0.421637	2.1567	0.0310291	0.324468		NO
Arf2	1129.96	0.445098	0.206518	2.15525	0.0311424	0.324468		NO
B230208H11Rik	23.2118	0.722774	0.335562	2.15392	0.0312466	0.324468		NO
Cbx2	192.808	-0.742069	0.344352	-2.15497	0.0311639	0.324468		NO
Ccdc58	638.442	0.398576	0.185006	2.1544	0.031209	0.324468		NO
Cobl	64.2583	-0.964662	0.447477	-2.15578	0.031101	0.324468		NO
Polr3b	1188.36	0.291446	0.135172	2.15611	0.0310754	0.324468		NO
Rsph3b	107.54	0.515921	0.239479	2.15435	0.0312126	0.324468		NO
Slamf9	51.5225	0.90281	0.418999	2.15468	0.0311867	0.324468		NO
Slc41a2	370.287	-0.823598	0.382056	-2.1557	0.031107	0.324468		NO
Slc5a9	94.5283	-1.05264	0.488668	-2.15411	0.0312318	0.324468		NO
Tspan9	5881.71	0.605285	0.280865	2.15507	0.0311561	0.324468		NO
A930001C03Rik	26.2249	0.85652	0.397716	2.1536	0.0312719	0.324487		NO
Sun2	3598.27	-0.556039	0.258301	-2.15268	0.031344	0.324992		NO
Ext2	1260.05	0.370496	0.172137	2.15233	0.0313713	0.325031		NO
Als2cl	2279.37	0.505027	0.234703	2.15177	0.0314153	0.325243		NO
1110038B12Rik	1045.37	0.485477	0.225654	2.15142	0.0314428	0.325285		NO
Nhsl2	36.6994	-0.850746	0.395584	-2.15061	0.0315069	0.325705		NO
Cpne5	46.2347	-0.958132	0.445635	-2.15004	0.031552	0.325861		NO
Me2	995.096	0.538756	0.250674	2.14923	0.0316162	0.325861		NO
Pam	4065.66	0.588271	0.273655	2.14968	0.0315804	0.325861		NO
Tmem125	1005.18	-0.733726	0.341366	-2.14938	0.0316042	0.325861		NO
Slco2b1	271.811	-0.673127	0.313404	-2.1478	0.0317299	0.32679		NO
Gstt2	38.2321	-0.761315	0.354771	-2.14593	0.0318783	0.327723		NO
Snrk	3622.03	0.579211	0.269932	2.14577	0.0318916	0.327723		NO
Spon1	237.826	0.791306	0.368677	2.14634	0.0318459	0.327723		NO
Xrcc5	1932.93	0.492801	0.229741	2.14503	0.0319505	0.328075		NO
Zzef1	2889.57	0.306177	0.142757	2.14475	0.0319732	0.328075		NO
Cdkl5	103.682	-0.578786	0.27005	-2.14325	0.0320928	0.328815		NO
Kif13b	1411.48	-0.421676	0.19672	-2.14353	0.0320707	0.328815		NO
Rpl32	42205.3	0.363288	0.169611	2.14189	0.0322025	0.329695		NO
Spata6	280.126	0.526675	0.245969	2.14123	0.0322558	0.329996		NO
Rps2	87188.3	0.374505	0.174993	2.14011	0.0323456	0.33067		NO
1700048O20Rik	22.7963	-1.05198	0.491805	-2.13902	0.0324338	0.331327		NO
4631405J19Rik	112.625	0.944793	0.441835	2.13834	0.0324894	0.331588		NO
Ubc	18301.7	0.634868	0.296928	2.13812	0.0325072	0.331588		NO
Slc41a3	45.6047	-0.714809	0.334597	-2.13633	0.0326527	0.332827		NO
Duox2	112.31	-0.824945	0.386233	-2.13588	0.0326895	0.332957		NO
Nme3	300.09	-0.543304	0.254448	-2.13523	0.0327424	0.333016		NO
Stamos	85.3286	0.917281	0.429596	2.13521	0.0327435	0.333016		NO
Dagla	57.4922	-0.807577	0.378469	-2.1338	0.032859	0.333875		NO
Gm5531	64.054	0.754845	0.353797	2.13355	0.0328794	0.333875		NO
Gm6402	106.497	0.640865	0.30041	2.1333	0.0329003	0.333875		NO
Wnt7a	37.9457	1.01227	0.474607	2.13286	0.0329361	0.333994		NO
Fam49b	2545.58	0.529465	0.248381	2.13166	0.0330346	0.334748		NO
C1galt1	1525.04	0.620249	0.291094	2.13075	0.03311	0.335266		NO
Cdc42ep2	42.5146	-0.670278	0.314637	-2.13032	0.0331452	0.335287		NO
Eftud1	1695.39	0.505796	0.237448	2.13013	0.0331605	0.335287		NO
2610528A11Rik	1159.25	0.875501	0.411359	2.12831	0.0333113	0.336147		NO
Ero1l	6101.86	0.77714	0.365188	2.12806	0.0333324	0.336147		NO
Pnn	1231.01	-0.387952	0.182314	-2.12793	0.0333427	0.336147		NO
Wif1	191.532	-1.03162	0.484639	-2.12863	0.0332845	0.336147		NO
Sertad4	218.846	-0.825818	0.388218	-2.1272	0.0334033	0.336512		NO
Esyt3	382.009	-0.794228	0.373454	-2.12671	0.0334443	0.33668		NO
C1s2	25.8469	0.965866	0.454378	2.12569	0.0335293	0.337046		NO
Plxdc2	782.505	-0.768847	0.361682	-2.12575	0.0335237	0.337046		NO
Smarcd3	68.0207	-0.669372	0.31501	-2.12492	0.0335929	0.33744		NO
Tnfrsf23	486.109	0.880514	0.414473	2.12442	0.0336352	0.33762		NO
Nos1	29.633	-1.06237	0.500238	-2.12372	0.0336934	0.337959		NO
Mpp1	1907.56	0.48958	0.23066	2.12252	0.0337942	0.338725		NO
Gpa33	133.682	-1.07767	0.507859	-2.12198	0.0338391	0.33893		NO
Bglap3	77.1192	0.929846	0.438399	2.121	0.0339215	0.339019		NO
Cd82	761.566	-0.557751	0.262956	-2.12108	0.0339152	0.339019		NO
Gfer	762.434	0.498732	0.23509	2.12145	0.0338835	0.339019		NO
Cep97	170.733	-0.527569	0.248914	-2.11948	0.0340496	0.339809		NO
Klc3	1418.78	-0.552471	0.260635	-2.11971	0.0340305	0.339809		NO
Bcar3	1363.74	0.758805	0.358167	2.11858	0.034126	0.339836		NO
Dock9	3850.81	0.648783	0.306217	2.1187	0.0341154	0.339836		NO
Slc25a3	11253.6	0.379677	0.179203	2.1187	0.0341157	0.339836		NO
Fam20c	378.096	0.822496	0.388471	2.11726	0.0342375	0.340456		NO
Snhg9	21.4357	0.735938	0.347556	2.11746	0.0342204	0.340456		NO
Crlf1	256.059	-1.02318	0.483437	-2.11646	0.0343056	0.340848		NO
Hrh1	206.903	0.89653	0.42365	2.11621	0.0343274	0.340848		NO
Sytl5	101.749	0.930241	0.439637	2.11593	0.0343508	0.340848		NO
Cacna1c	138.194	-0.862277	0.407678	-2.1151	0.0344218	0.341309		NO
Pcsk5	417.535	-0.996946	0.471454	-2.11462	0.0344622	0.341465		NO
Bnipl	1845.9	-0.661831	0.313056	-2.1141	0.0345069	0.341663		NO
Ifnar1	2191.08	0.594473	0.281301	2.1133	0.0345751	0.341908		NO
Itgb5	2742.99	0.433301	0.205055	2.1131	0.0345919	0.341908		NO
Mapkapk3	4765.45	0.225773	0.106852	2.11294	0.0346058	0.341908		NO
LOC101056149	281.532	0.718261	0.340087	2.11199	0.0346871	0.342467		NO
Ctgf	938.955	-1.01817	0.482168	-2.11166	0.0347159	0.342507		NO
Lmcd1	52.2062	-0.789073	0.373934	-2.11019	0.0348417	0.343282		NO
Phtf1os	31.8416	0.891403	0.422441	2.11012	0.0348477	0.343282		NO
Tmem71	29.3346	0.73197	0.346926	2.10988	0.0348689	0.343282		NO
Nnt	450.964	0.461216	0.218672	2.10916	0.0349305	0.343644		NO
Gbe1	1017.71	0.52058	0.246958	2.10797	0.0350334	0.344119		NO
Orai2	1840.57	0.606407	0.287744	2.10745	0.0350782	0.344119		NO
Shisa2	394.618	-1.08491	0.514731	-2.10772	0.0350553	0.344119		NO
Skint10	26.9727	-1.11121	0.527177	-2.10784	0.0350447	0.344119		NO
Frmd4a	759.268	-0.817258	0.388034	-2.10615	0.035191	0.344738		NO
Kank2	238.029	-0.668359	0.317311	-2.10632	0.0351765	0.344738		NO
F2r	265.298	-0.765727	0.363714	-2.1053	0.0352652	0.345136		NO
Mmp9	1438.55	1.04794	0.497806	2.10511	0.0352816	0.345136		NO
Acot6	61.3436	-0.686268	0.326251	-2.1035	0.0354221	0.346266		NO
Klf7	446.086	0.662606	0.315308	2.10146	0.0356006	0.34752		NO
Trim7	536.022	0.788244	0.375059	2.10165	0.0355838	0.34752		NO
Myo1a	29.4006	-1.00639	0.479232	-2.10001	0.0357276	0.348514		NO
Krt32	42.3312	-1.01291	0.482524	-2.09919	0.0357998	0.348972		NO
1810044D09Rik	33.2033	0.680356	0.324205	2.09853	0.035858	0.349098		NO
Pcdhga10	87.2741	1.03149	0.491594	2.09826	0.0358824	0.349098		NO
Rps21	23119.6	0.475823	0.226778	2.09819	0.0358883	0.349098		NO
Dsg2	1947.2	-0.542996	0.258893	-2.09738	0.0359604	0.349553		NO
Rerg	42.5045	-0.858714	0.409499	-2.09699	0.0359945	0.349639		NO
Hoxa6	26.0675	1.06575	0.508537	2.09573	0.0361066	0.350482		NO
Nt5c1a	141.448	1.03531	0.494233	2.09477	0.036191	0.351055		NO
Adcy6	788.201	-0.622156	0.297059	-2.09439	0.0362255	0.351144		NO
Arl4d	548.184	0.874292	0.417576	2.09373	0.0362838	0.351278		NO
Pcdhb4	59.3292	0.848681	0.405357	2.09366	0.0362901	0.351278		NO
Bfsp1	374.838	-1.01797	0.486291	-2.09333	0.0363198	0.35132		NO
Tmem45a	2909.04	-1.01259	0.483887	-2.09262	0.0363827	0.351683		NO
Ccdc114	32.9926	-0.808122	0.386292	-2.092	0.0364387	0.351945		NO
Ptk7	9583.27	0.427219	0.204268	2.09147	0.0364861	0.351945		NO
Tmtc2	335.876	0.557955	0.266772	2.09151	0.0364826	0.351945		NO
Serpinb8	2100.19	-0.495539	0.237021	-2.0907	0.0365551	0.352365		NO
Klk13	158.01	-1.01668	0.486707	-2.08889	0.0367173	0.353682		NO
Rasgrp2	23.37	-0.972568	0.465672	-2.08853	0.0367502	0.353753		NO
Plekha3	559.978	0.413221	0.197905	2.08797	0.0368002	0.353987		NO
Dcaf12	2067.88	0.29824	0.14289	2.08719	0.0368708	0.354402		NO
Grip2	86.3935	-0.645308	0.309214	-2.08693	0.0368945	0.354402		NO
Gja1	25214	0.544752	0.261149	2.08598	0.0369801	0.354979		NO
Apln	76.8985	-0.83521	0.400672	-2.08452	0.0371127	0.355214		NO
Cstf2t	700.252	-0.579653	0.278142	-2.08402	0.0371586	0.355214		NO
Flnc	453.372	-0.94526	0.453523	-2.08426	0.0371367	0.355214		NO
Gm3002	372.73	-0.764458	0.366819	-2.08402	0.0371584	0.355214		NO
Gpi1	15900.8	0.552916	0.265244	2.08455	0.0371098	0.355214		NO
Irak1	1110.64	0.405213	0.194436	2.08405	0.0371559	0.355214		NO
1810011O10Rik	9332.62	0.593868	0.285298	2.08157	0.0373815	0.356335		NO
Arhgef26	111.169	-0.704915	0.338666	-2.08145	0.0373931	0.356335		NO
Pfkl	11334.3	0.584492	0.280827	2.08132	0.0374046	0.356335		NO
Sh3tc2	307.772	-0.850949	0.408773	-2.08172	0.0373684	0.356335		NO
Slc19a2	2816.23	0.752064	0.361208	2.08208	0.0373355	0.356335		NO
Dnah7b	59.1705	-0.975432	0.468899	-2.08026	0.0375017	0.357014		NO
Gbp6	136.87	-0.879003	0.422653	-2.07972	0.0375508	0.357236		NO
Gpatch4	423.825	-0.376346	0.181013	-2.07912	0.0376066	0.357521		NO
Csnk1g1	944.155	0.326906	0.157347	2.07761	0.0377453	0.358513		NO
Rab13	379.586	0.43585	0.209803	2.07742	0.0377628	0.358513		NO
Grb14	23.7968	-0.895893	0.431338	-2.07701	0.0378005	0.358625		NO
Ppp1r3c	35.048	-1.02723	0.494935	-2.07548	0.0379422	0.359477		NO
Sec14l4	183.307	-0.852566	0.41076	-2.07558	0.0379327	0.359477		NO
Fbxo47	37.7792	0.519213	0.250335	2.07407	0.0380726	0.360123		NO
Grip1os2	26.4623	0.744967	0.359188	2.07403	0.0380767	0.360123		NO
Rhbg	186.737	-0.901383	0.434631	-2.0739	0.0380884	0.360123		NO
Zc3h12c	3063.52	0.810383	0.391421	2.07036	0.0384184	0.362995		NO
Kcnq1	41.6586	-0.998327	0.482381	-2.06958	0.0384914	0.363437		NO
Slc16a3	4478.26	0.685109	0.331117	2.06909	0.0385378	0.363627		NO
Rbfox3	31.8372	-1.06977	0.517141	-2.06863	0.0385811	0.363787		NO
Spint1	3364.61	-0.712694	0.344732	-2.06739	0.0386977	0.364639		NO
Phc1	222.96	0.528494	0.255691	2.06692	0.0387413	0.364801		NO
Tet1	42.189	-0.845893	0.409356	-2.0664	0.0387907	0.365017		NO
Dixdc1	244.832	0.661065	0.320053	2.06549	0.0388771	0.365582		NO
Cask	2882.68	0.356647	0.172778	2.06419	0.0389994	0.365986		NO
Cyp4b1	468.874	-0.830536	0.402324	-2.06434	0.038985	0.365986		NO
Kif11	2787.01	-0.458257	0.22196	-2.06459	0.0389618	0.365986		NO
Glg1	2114.18	0.41027	0.198885	2.06285	0.0391272	0.366937		NO
Cox18	253.667	0.345085	0.167336	2.06223	0.039186	0.366991		NO
Soat1	2810.43	-0.951484	0.461376	-2.06228	0.0391813	0.366991		NO
Gpr85	112.051	0.903809	0.438513	2.06108	0.0392958	0.367766		NO
Slc16a2	258.699	-0.677119	0.328571	-2.0608	0.0393219	0.367766		NO
Ikbip	642.765	0.612917	0.29747	2.06043	0.039357	0.367846		NO
Bgn	333.087	-0.837299	0.406445	-2.06005	0.0393933	0.367937		NO
Camk2n1	77.4217	-0.75219	0.365285	-2.05919	0.0394761	0.368462		NO
Pln	28.6322	0.907521	0.440786	2.05887	0.0395066	0.368498		NO
Rnu11	296.151	0.640032	0.310976	2.05814	0.0395764	0.368652		NO
Sgsm3	674.067	0.43669	0.212162	2.05829	0.0395625	0.368652		NO
Gpr126	954.122	-0.671511	0.326375	-2.05748	0.0396397	0.368993		NO
Hopx	1027.59	-0.767152	0.372993	-2.05675	0.0397104	0.369403		NO
Atg9a	780.116	0.435051	0.211643	2.05559	0.0398223	0.369699		NO
Jund	10740.3	0.555347	0.27012	2.05593	0.0397894	0.369699		NO
Prex1	84.6648	-0.851706	0.414318	-2.05568	0.0398131	0.369699		NO
Dennd1c	111.379	-0.688564	0.335017	-2.05531	0.0398491	0.369699		NO
Casc4	819.613	0.496749	0.24179	2.05446	0.0399311	0.370047		NO
Cnot2	3852.35	0.311533	0.151644	2.05437	0.03994	0.370047		NO
Ercc8	367.145	-0.344002	0.167535	-2.05331	0.0400427	0.370255		NO
Flcn	1044.89	0.489832	0.238546	2.05341	0.0400332	0.370255		NO
Tmco3	544.136	0.314356	0.153065	2.05374	0.0400004	0.370255		NO
Gbp7	218.194	-0.858329	0.418248	-2.0522	0.0401503	0.370754		NO
Rpl10a	27369.6	0.42026	0.204764	2.05241	0.0401295	0.370754		NO
Fam212a	330.897	-0.489503	0.23856	-2.05191	0.0401783	0.370765		NO
Grm4	53.9342	-0.893422	0.435659	-2.05074	0.0402924	0.370863		NO
Hpse	111.023	0.792662	0.386514	2.0508	0.0402867	0.370863		NO
Igfbp6	473.03	-0.929715	0.453486	-2.05015	0.0403497	0.370863		NO
Ndufaf4	687.539	-0.336087	0.163919	-2.05032	0.0403329	0.370863		NO
Pkia	87.2157	-0.98177	0.478799	-2.05048	0.0403174	0.370863		NO
Ptpn14	2155.7	-0.629937	0.30708	-2.05138	0.0402303	0.370863		NO
Col11a2	152.697	-0.828222	0.404079	-2.04965	0.0403982	0.370979		NO
Plod2	1348.64	0.883607	0.431139	2.04947	0.0404158	0.370979		NO
Gfpt1	1599.91	0.515552	0.251708	2.04822	0.0405388	0.371861		NO
Mmp27	24.9519	0.892861	0.435982	2.04793	0.0405668	0.371872		NO
Gm10012	81.3013	0.742813	0.362775	2.04759	0.0406005	0.371934		NO
E2f8	547.804	-0.700264	0.342158	-2.04661	0.0406965	0.372321		NO
Ptger4	1044.06	0.665426	0.32511	2.04677	0.0406803	0.372321		NO
Dgat2	807.648	-0.713794	0.348882	-2.04595	0.0407615	0.372423		NO
Traf1	193.704	0.946328	0.462529	2.04598	0.0407579	0.372423		NO
Pax9	257.331	0.915052	0.447315	2.04566	0.0407902	0.372439		NO
Fsd1l	115.941	-0.808762	0.39558	-2.0445	0.0409045	0.373237		NO
Ing2	429.962	0.372969	0.182495	2.04372	0.0409814	0.373692		NO
Capn6	50.9714	-0.912789	0.447019	-2.04194	0.0411571	0.375047		NO
Gpr125	1682.12	-0.71775	0.351744	-2.04055	0.041296	0.375818		NO
Sema4g	72.0651	-0.623296	0.305444	-2.04062	0.0412883	0.375818		NO
Mis18bp1	297.544	-0.450743	0.220933	-2.04017	0.0413329	0.375889		NO
Prep	3751.42	0.435461	0.213498	2.03965	0.0413853	0.375889		NO
Rab33b	1551.61	0.48631	0.23841	2.0398	0.0413699	0.375889		NO
4930526I15Rik	187.502	0.383363	0.188015	2.039	0.04145	0.375983		NO
Gucy1a2	47.9554	-1.01753	0.498979	-2.03923	0.0414269	0.375983		NO
Aox3	22.4063	-0.962821	0.472302	-2.03857	0.041493	0.376127		NO
Nudt14	764.362	0.493438	0.242182	2.03747	0.0416027	0.376843		NO
Rpl24	18341.1	0.317233	0.155738	2.03696	0.0416537	0.376843		NO
Tbx2	49.49	-0.990439	0.486231	-2.03697	0.0416531	0.376843		NO
Nxph3	56.6431	-0.812505	0.398961	-2.03655	0.041695	0.376971		NO
Cmpk2	56.1075	-0.916397	0.45013	-2.03585	0.0417655	0.377361		NO
Rhbdd2	255.406	0.514108	0.252647	2.03489	0.0418622	0.377989		NO
Ccdc113	37.5711	0.885069	0.43505	2.03441	0.0419103	0.378176		NO
Mcu	452.826	0.321177	0.157904	2.03401	0.0419508	0.378275		NO
Sox4	2415.26	0.664711	0.326882	2.03349	0.0420032	0.378275		NO
Thbs3	99.2227	-0.62752	0.308586	-2.03354	0.0419983	0.378275		NO
Chic1	35.2533	-0.989484	0.486913	-2.03216	0.0421376	0.3785		NO
LOC106740	87.7382	-0.756685	0.372335	-2.03227	0.0421263	0.3785		NO
Pgam1	16791.2	0.624199	0.307067	2.03277	0.0420753	0.3785		NO
Sh3kbp1	1014.81	0.81749	0.402276	2.03216	0.0421372	0.3785		NO
Crtc1	121.505	-0.460564	0.22672	-2.03142	0.042212	0.378922		NO
Acad9	4264.44	-0.611985	0.301792	-2.02784	0.0425767	0.380012		NO
Cdkl2	567.913	0.310858	0.153174	2.02944	0.0424134	0.380012		NO
E2f2	159.415	-0.726945	0.358523	-2.02761	0.0426003	0.380012		NO
Lmo4	613.582	-0.451428	0.222579	-2.02817	0.0425431	0.380012		NO
Me3	29.9588	-0.832807	0.410702	-2.02776	0.0425843	0.380012		NO
Mepce	920.749	0.4732	0.233359	2.02778	0.0425827	0.380012		NO
Pcdh20	25.7413	-1.03257	0.508743	-2.02965	0.0423924	0.380012		NO
Sox15	461.549	0.702479	0.346153	2.02939	0.0424188	0.380012		NO
Spp1	735.697	-1.06983	0.527259	-2.02904	0.0424537	0.380012		NO
Ssr4	4262.64	0.371684	0.183319	2.02753	0.0426079	0.380012		NO
Procr	14190.3	0.967644	0.477434	2.02676	0.042687	0.380228		NO
Rps26	13157.1	0.41706	0.205773	2.0268	0.0426826	0.380228		NO
4930451G09Rik	21.6693	-0.795745	0.392986	-2.02487	0.0428807	0.3811		NO
Ovca2	178.171	-0.499938	0.24684	-2.02535	0.0428311	0.3811		NO
Rpusd2	241.621	-0.429733	0.212239	-2.02476	0.042892	0.3811		NO
Tecpr1	638.71	0.480613	0.237371	2.02473	0.0428951	0.3811		NO
Dnah17	152.542	-0.802271	0.396362	-2.02409	0.0429611	0.381441		NO
Vsnl1	202.498	0.624061	0.308631	2.02203	0.043173	0.383077		NO
Emilin1	49.9727	-0.643852	0.318491	-2.02157	0.0432205	0.383126		NO
Gpr115	1084.87	-0.779086	0.385436	-2.02131	0.0432475	0.383126		NO
Krt24	159.158	-1.04237	0.515724	-2.02118	0.0432616	0.383126		NO
Grin2b	22.147	-1.0034	0.496546	-2.02077	0.0433039	0.383238		NO
Mrpl17	1423.84	0.404137	0.200096	2.01972	0.0434126	0.383238		NO
Pitpnc1	928.49	0.794489	0.393233	2.0204	0.0433419	0.383238		NO
Tle2	78.5495	-0.63924	0.316451	-2.02003	0.04338	0.383238		NO
Tpp1	1044.64	0.467684	0.23154	2.01988	0.0433956	0.383238		NO
Tmem74	23.1855	1.06209	0.525982	2.01926	0.0434603	0.383414		NO
Adam10	2432.84	0.37423	0.185515	2.01725	0.0436695	0.384766		NO
Tecr	3306.12	-0.361937	0.179431	-2.01714	0.0436807	0.384766		NO
Wdfy1	516.061	0.548519	0.27195	2.01699	0.0436969	0.384766		NO
9330188P03Rik	194.24	0.98804	0.489955	2.01659	0.0437381	0.384884		NO
Hist1h4n	755.306	0.811977	0.40284	2.01563	0.0438385	0.385263		NO
Prr5l	141.234	-0.95849	0.475581	-2.01541	0.0438616	0.385263		NO
Suclg2	3555.17	0.449438	0.223004	2.01538	0.0438646	0.385263		NO
Uba7	154.483	-0.673888	0.334488	-2.01468	0.043938	0.385663		NO
Asah1	2440.84	0.514707	0.255637	2.01343	0.0440698	0.386574		NO
Obscn	159.174	-0.942732	0.468383	-2.01274	0.0441422	0.386719		NO
Zfp804a	24.0436	1.05663	0.524915	2.01296	0.0441189	0.386719		NO
Pak6	1198.58	0.583281	0.28992	2.01187	0.0442341	0.387279		NO
Atp6ap1	3275.37	0.394723	0.196297	2.01084	0.0443421	0.387734		NO
Fam98c	199.61	0.455642	0.226573	2.01102	0.0443235	0.387734		NO
Fam213b	290.504	-0.81868	0.407306	-2.00999	0.0444324	0.388034		NO
Gata6	108.221	-0.700388	0.348419	-2.01019	0.0444111	0.388034		NO
Smpd3	43.224	-0.662173	0.329497	-2.00965	0.0444685	0.388104		NO
Bola2	1239.53	0.415944	0.207051	2.0089	0.0445477	0.388551		NO
Psg18	45.124	0.912491	0.454395	2.00814	0.0446279	0.389005		NO
Chd5	112.68	-0.77387	0.385519	-2.00734	0.044713	0.389349		NO
Ppp1r14a	73.5438	-0.720787	0.359093	-2.00724	0.0447236	0.389349		NO
Ache	22.5894	-0.805101	0.401279	-2.00634	0.0448202	0.389944		NO
Nkd1	27.2041	-0.756031	0.376946	-2.00568	0.0448908	0.390068		NO
Rps15a-ps4	245.236	0.487689	0.243134	2.00585	0.0448725	0.390068		NO
Ocel1	165.882	0.356615	0.177826	2.00541	0.0449192	0.39007		NO
Abcd3	3247.59	-0.518716	0.258759	-2.00463	0.0450026	0.39009		NO
Arhgap32	1975.63	-0.405339	0.202208	-2.00456	0.0450099	0.39009		NO
Cacna2d1	57.4041	-0.968325	0.48338	-2.00324	0.0451516	0.39009		NO
Ccl7	224.506	0.809937	0.404149	2.00406	0.0450639	0.39009		NO
Faxc	145.116	-0.770449	0.3846	-2.00325	0.0451507	0.39009		NO
Mbp	1304.3	0.565581	0.282366	2.00301	0.0451767	0.39009		NO
Mrpl33	1827.61	0.376122	0.187769	2.00311	0.0451659	0.39009		NO
Pcdhb9	114.872	0.810612	0.40437	2.00463	0.0450027	0.39009		NO
Tbl1x	1636.7	0.29319	0.146347	2.00339	0.0451358	0.39009		NO
Tspan1	28.1974	-0.968796	0.483731	-2.00276	0.0452033	0.39009		NO
Zfp128	24.0477	-0.837191	0.418104	-2.00235	0.0452469	0.390223		NO
Eif3k	6118.38	0.298524	0.149125	2.00184	0.0453021	0.390418		NO
Krt10	6880.92	-1.0265	0.512833	-2.00162	0.0453259	0.390418		NO
Samd12	140.904	0.836869	0.418176	2.00123	0.0453673	0.390531		NO
H2afj	2959.98	0.61229	0.306018	2.00083	0.0454106	0.390661		NO
Acvr2b	74.3066	-0.496914	0.248554	-1.99922	0.0455842	0.391668		NO
Ercc5	1338.91	0.425061	0.212589	1.99945	0.0455599	0.391668		NO
Frem1	38.4819	-0.888307	0.444447	-1.99868	0.0456432	0.391688		NO
Gys1	1111.26	0.605424	0.30288	1.99889	0.0456199	0.391688		NO
Arhgap35	4321.77	0.531518	0.266148	1.99708	0.0458169	0.392231		NO
Cep192	1308.93	0.368887	0.184716	1.99705	0.0458198	0.392231		NO
Magee1	85.0879	-0.512815	0.256715	-1.9976	0.0457597	0.392231		NO
Ubl5	1636.94	0.290593	0.145502	1.99718	0.0458057	0.392231		NO
Grina	787.274	0.518796	0.259849	1.99652	0.0458769	0.392477		NO
Ebf1	36.0743	-0.988715	0.495312	-1.99614	0.0459182	0.392588		NO
Hmha1	232.533	0.979779	0.491137	1.99492	0.0460517	0.393486		NO
Lrrc56	66.896	0.496735	0.249059	1.99445	0.0461033	0.393684		NO
Ctif	172.758	-0.451022	0.226398	-1.99216	0.0463534	0.394001		NO
Cyfip2	42.1002	-0.772614	0.387853	-1.99203	0.0463681	0.394001		NO
Gm11201	50.0414	-0.796767	0.39978	-1.99301	0.0462598	0.394001		NO
Hspa1b	16081.9	0.54101	0.271395	1.99344	0.0462133	0.394001		NO
Pdzrn3	852.927	-0.762931	0.382933	-1.99234	0.0463341	0.394001		NO
Ripply3	90.2523	-0.833668	0.418307	-1.99296	0.0462662	0.394001		NO
Rmdn3	1280.97	-0.414912	0.208273	-1.99216	0.0463538	0.394001		NO
Tagap	34.788	0.635296	0.318887	1.99223	0.0463458	0.394001		NO
Cp	184.607	-0.944388	0.474988	-1.98824	0.0467857	0.395828		NO
Dact2	255.023	-0.964797	0.485199	-1.98845	0.0467615	0.395828		NO
Gjc1	66.0834	-1.03942	0.522917	-1.98774	0.0468406	0.395828		NO
H2-T23	4548.25	-0.520013	0.261552	-1.98819	0.0467911	0.395828		NO
Hmox1	2122.78	0.994587	0.500358	1.98775	0.0468393	0.395828		NO
Ift122	362.688	0.479108	0.240949	1.98842	0.0467652	0.395828		NO
Ldb3	31.7646	-0.791501	0.397939	-1.989	0.0467011	0.395828		NO
Rras2	2633.62	0.675262	0.339556	1.98866	0.0467384	0.395828		NO
Steap1	166.452	0.839084	0.421928	1.98869	0.0467354	0.395828		NO
Arhgap25	170.229	-0.883535	0.444582	-1.98734	0.0468846	0.395959		NO
Fam161a	65.5017	0.731297	0.368105	1.98666	0.0469606	0.396359		NO
Polr1d	7901.99	0.320163	0.161192	1.98622	0.0470089	0.396423		NO
Rplp2	23881.9	0.313889	0.158045	1.98607	0.0470255	0.396423		NO
Ryr3	88.0848	-0.957987	0.48245	-1.98567	0.0470698	0.396555		NO
Pnp	4150.24	0.427087	0.215133	1.98522	0.0471199	0.396736		NO
Dnase1	38.7693	-0.51711	0.260574	-1.9845	0.0472	0.397169		NO
Lap3	3076.79	-0.484323	0.244117	-1.98397	0.0472588	0.397421		NO
Cacng4	41.0811	-1.01188	0.510167	-1.98344	0.0473185	0.397682		NO
Smim5	42.2071	-0.80985	0.4085	-1.9825	0.0474233	0.397854		NO
Zfp862-ps	58.8527	-0.685326	0.345691	-1.98248	0.0474251	0.397854		NO
Zik1	38.1133	-0.725438	0.365847	-1.9829	0.0473787	0.397854		NO
Ap2s1	2897.76	0.443101	0.223603	1.98164	0.0475192	0.397919		NO
Inpp5a	529.941	0.378266	0.190884	1.98165	0.0475182	0.397919		NO
Irgm1	366.018	-0.765657	0.386306	-1.982	0.0474795	0.397919		NO
Zswim5	22.3215	-0.800591	0.404056	-1.98139	0.047548	0.39792		NO
Smpdl3b	701.549	-0.539091	0.272343	-1.97945	0.0477651	0.399495		NO
1700007L15Rik	51.0028	0.599099	0.302821	1.97839	0.0478843	0.399946		NO
C9	22.2804	-0.912779	0.461334	-1.97857	0.0478649	0.399946		NO
Taf10	2045.2	0.459322	0.232192	1.9782	0.0479057	0.399946		NO
Snora30	85.7794	0.660684	0.334144	1.97725	0.0480138	0.400414		NO
Zfp52	2069.88	0.679639	0.343739	1.9772	0.0480196	0.400414		NO
Krt84	27.7027	-0.946058	0.47859	-1.97676	0.0480685	0.40058		NO
Rgs12	6614.61	0.358971	0.181638	1.9763	0.0481206	0.400774		NO
Aldh16a1	1886.69	0.315208	0.159682	1.97398	0.0483838	0.402439		NO
Itgb3bp	131.094	-0.469307	0.237753	-1.97393	0.0483897	0.402439		NO
Plin4	43.5956	-0.763134	0.386638	-1.97377	0.0484078	0.402439		NO
Hoxb2	172.739	-0.72453	0.367287	-1.97265	0.0485352	0.403256		NO
Cc2d1b	2557.38	0.328165	0.166445	1.97161	0.0486537	0.40387		NO
Pgbd1	44.8539	0.66169	0.335672	1.97124	0.0486966	0.40387		NO
Tvp23a	63.2898	-0.485878	0.246473	-1.97132	0.0486869	0.40387		NO
Zfand4	89.9455	0.668094	0.33899	1.97084	0.0487426	0.404009		NO
Rhbdl2	282.813	0.571581	0.29018	1.96974	0.0488679	0.404805		NO
Gm10509	68.7219	-0.669746	0.340072	-1.96942	0.0489046	0.404867		NO
Hook2	2041.85	0.338797	0.172062	1.96905	0.0489479	0.404983		NO
Lrrc4	519.325	0.893322	0.453768	1.96867	0.0489905	0.405093		NO
Gaa	970.999	0.398473	0.202486	1.9679	0.0490794	0.40543		NO
Rpl41	67190.9	0.388958	0.19766	1.96781	0.0490898	0.40543		NO
Fam227a	29.0557	-0.624935	0.31808	-1.96471	0.0494474	0.407846		NO
Lgi1	24.9895	1.00942	0.51372	1.96492	0.0494237	0.407846		NO
Mctp2	1735.6	0.764878	0.389368	1.96441	0.0494828	0.407846		NO
Snhg18	86.6505	0.681493	0.346947	1.96426	0.0495002	0.407846		NO
Rps17	29257.8	0.312757	0.159273	1.96365	0.0495702	0.40818		NO
Igf2r	9134.6	0.779789	0.397231	1.96306	0.049639	0.408503		NO
Gltscr2	8984.41	0.349803	0.178219	1.96277	0.049673	0.408541		NO
Ndrg2	856.331	-0.766124	0.390614	-1.96133	0.0498403	0.409673		NO
Acad10	223.343	0.472992	0.241254	1.96056	0.0499306	0.409686		NO
Camk2d	1785.6	0.387655	0.197717	1.96066	0.0499188	0.409686		NO
Tceb3	2321.07	0.390344	0.199067	1.96087	0.0498944	0.409686		NO
Dnm3	47.0436	-0.659532	0.336508	-1.95993	0.0500043	0.410047		NO
Zcchc6	3857.15	0.3359	0.171458	1.95909	0.0501027	0.41061		NO
Adam11	32.2104	-0.951834	0.486096	-1.95812	0.0502158	0.410808		NO
Mx1	81.4131	-0.886446	0.452688	-1.95818	0.0502085	0.410808		NO
Syngap1	42.1074	-0.586681	0.299537	-1.95862	0.0501568	0.410808		NO
Timm10	458.959	-0.3539	0.180776	-1.95767	0.0502689	0.410937		NO
Tyw3	99.0197	-0.599932	0.306482	-1.95748	0.0502909	0.410937		NO
Ecm2	24.9881	-0.806391	0.41207	-1.95693	0.0503557	0.411223		NO
Eif3f	4283.66	0.419003	0.214195	1.95617	0.0504449	0.411644		NO
Tcp11l2	1170.67	0.651196	0.332925	1.95599	0.0504667	0.411644		NO
Svop	23.2316	-1.00652	0.514673	-1.95565	0.0505069	0.411729		NO
Dnajb12	687.939	0.28716	0.146921	1.95453	0.050639	0.412564		NO
Tmem88b	27.6279	-0.680237	0.348259	-1.95325	0.0507901	0.413551		NO
Dlc1	780.959	-0.484749	0.248283	-1.95241	0.0508901	0.41389		NO
Ing1	751.115	0.309115	0.158326	1.95239	0.0508915	0.41389		NO
Parp16	91.8581	0.55704	0.285349	1.95214	0.0509221	0.413895		NO
Kcnc3	65.9982	0.63828	0.32712	1.95121	0.0510319	0.414191		NO
Plekhg1	409.561	0.883398	0.452775	1.95107	0.0510482	0.414191		NO
Rps28	21332.2	0.363289	0.186175	1.95133	0.0510177	0.414191		NO
Syne2	17573.4	-0.470661	0.241263	-1.95082	0.0510782	0.414191		NO
Aldh3b2	964.044	-0.865832	0.444222	-1.9491	0.0512837	0.414239		NO
Eml1	117.25	-0.896025	0.45974	-1.94898	0.0512978	0.414239		NO
Gm12250	25.5968	-0.988127	0.50666	-1.95028	0.0511432	0.414239		NO
Gm19557	178.63	-0.776196	0.398029	-1.9501	0.0511642	0.414239		NO
Hoxc5	72.5712	0.922043	0.472892	1.94979	0.0512006	0.414239		NO
Nipsnap1	450.586	-0.555914	0.285196	-1.94924	0.0512672	0.414239		NO
Oasl2	221.822	-0.8571	0.439634	-1.94958	0.0512265	0.414239		NO
Sh2b2	300.732	0.868092	0.445458	1.94877	0.0513235	0.414239		NO
Ipo4	1436.05	0.381776	0.19596	1.94823	0.0513877	0.414515		NO
Asl	699.71	0.463841	0.238143	1.94774	0.0514462	0.414746		NO
Tmod4	34.4974	-0.911765	0.468194	-1.94741	0.0514861	0.414826		NO
Gpx3	46.2522	-0.660011	0.339136	-1.94616	0.0516358	0.415344		NO
Krt14	637096	0.57061	0.293204	1.94612	0.0516404	0.415344		NO
Zfp964	31.6889	-0.707466	0.363453	-1.94651	0.0515932	0.415344		NO
Eml4	2618.98	-0.529057	0.27197	-1.94528	0.0517412	0.41543		NO
Ldhd	302.635	0.597329	0.307006	1.94566	0.0516959	0.41543		NO
Tmem229b	159.316	-0.736297	0.378502	-1.94529	0.0517398	0.41543		NO
Ndrg4	259.249	0.664337	0.341576	1.94492	0.0517852	0.415542		NO
Carns1	35.6729	-0.729909	0.37536	-1.94456	0.0518285	0.415649		NO
Chst2	1446.1	0.731116	0.376062	1.94414	0.051879	0.415813		NO
Medag	199.425	-0.917398	0.471999	-1.94364	0.0519384	0.416048		NO
Kdelr3	151.058	-0.502081	0.25838	-1.94319	0.051993	0.416245		NO
Megf8	2242.66	0.430664	0.222031	1.93966	0.0524213	0.419431		NO
Fgf13	34.4763	-0.825747	0.426067	-1.93807	0.0526147	0.420498		NO
Ptplad1	4552.48	-0.354406	0.182866	-1.93806	0.0526154	0.420498		NO
Car5b	904.359	0.714281	0.368678	1.93741	0.0526947	0.42066		NO
Sult4a1	123.678	0.890497	0.459635	1.9374	0.0526964	0.42066		NO
Anxa6	933.989	-0.40915	0.211242	-1.93688	0.0527604	0.420777		NO
Cdkn2c	191.637	-0.624754	0.322629	-1.93645	0.0528128	0.420777		NO
Enc1	1164.16	0.587627	0.303507	1.93612	0.0528525	0.420777		NO
Mettl18	63.8078	-0.611038	0.315613	-1.93604	0.0528631	0.420777		NO
Myh6	28.9124	-0.97499	0.503523	-1.93634	0.0528266	0.420777		NO
Dip2b	3863.77	0.306349	0.158362	1.93449	0.0530529	0.422045		NO
Gprc5a	768.19	0.911763	0.471457	1.93392	0.0531224	0.422127		NO
Wbscr27	208.115	0.623462	0.322384	1.93391	0.0531243	0.422127		NO
Nudt10	26.7869	0.820582	0.424418	1.93343	0.0531831	0.422352		NO
Dchs1	87.7601	-0.645926	0.334277	-1.93231	0.0533212	0.422698		NO
Gpr155	257.236	-0.68087	0.352399	-1.9321	0.0533474	0.422698		NO
Mllt3	851.32	0.384171	0.198837	1.93209	0.0533487	0.422698		NO
Vill	447.83	0.641925	0.332148	1.93265	0.0532798	0.422698		NO
Spef1	323.623	-0.499871	0.25885	-1.93112	0.0534679	0.4234		NO
Napa	2601.27	0.323639	0.167644	1.93051	0.0535431	0.423753		NO
Ccr5	24.751	0.930059	0.481887	1.93004	0.0536023	0.423759		NO
Chrna1	120.811	0.728121	0.377266	1.92999	0.0536078	0.423759		NO
Scnn1a	146.264	-0.787163	0.407906	-1.92977	0.0536358	0.423759		NO
Vstm4	28.5138	-1.0019	0.519323	-1.92924	0.0537008	0.424031		NO
Aamp	6445.1	0.232859	0.120749	1.92846	0.0537984	0.424076		NO
Endou	2422.7	0.771305	0.399862	1.92893	0.0537398	0.424076		NO
Unc5a	84.2984	-0.918271	0.476116	-1.92867	0.0537715	0.424076		NO
Pitpnm3	1154.17	0.711776	0.369157	1.92811	0.0538414	0.424173		NO
AA388235	38.5066	0.61092	0.316947	1.92752	0.0539154	0.424515		NO
Ftl1	11628.8	0.611322	0.317404	1.92601	0.0541037	0.42503		NO
Mb21d1	221.6	-0.524039	0.272029	-1.92641	0.0540534	0.42503		NO
Shpk	87.0251	0.520205	0.270064	1.92623	0.0540754	0.42503		NO
Zhx2	597.023	0.660548	0.342894	1.92639	0.0540553	0.42503		NO
Shfm1	7261.07	0.392238	0.203717	1.92541	0.0541784	0.425375		NO
Tmprss9	36.349	-0.71924	0.373631	-1.925	0.0542293	0.425534		NO
Thyn1	77.996	0.64434	0.334866	1.92417	0.0543333	0.425867		NO
Ttc37	3773.5	0.393325	0.204401	1.92428	0.054319	0.425867		NO
Acrbp	46.7237	-0.608897	0.316499	-1.92385	0.0543734	0.425924		NO
Rbck1	2163.02	0.485461	0.252368	1.92362	0.0544021	0.425924		NO
Gimap1	32.1596	-0.753653	0.39196	-1.92278	0.0545078	0.426352		NO
Otogl	21.9238	-0.937656	0.487678	-1.9227	0.0545183	0.426352		NO
Igflr1	91.0163	-0.456086	0.237265	-1.92226	0.0545726	0.426535		NO
Hspa1a	8662.81	0.635667	0.330741	1.92195	0.0546122	0.426604		NO
Zfp287	26.5577	-0.798031	0.415435	-1.92095	0.0547378	0.427344		NO
Ripk3	950.452	0.613011	0.319194	1.9205	0.054795	0.427549		NO
Vmn2r-ps129	61.8687	0.657841	0.342624	1.92001	0.0548565	0.427788		NO
Gbp2	863.076	-0.756118	0.393912	-1.91951	0.0549198	0.428041		NO
Bbox1	223.851	-1.01167	0.527163	-1.91908	0.054974	0.428222		NO
Cdc25a	596.565	-0.553283	0.288367	-1.91868	0.0550254	0.428381		NO
Lgr6	535.059	-0.869038	0.453349	-1.91693	0.0552469	0.429682		NO
Nrxn2	50.8476	-0.933624	0.487119	-1.91662	0.0552856	0.429682		NO
Nxph4	26.6769	0.616457	0.321596	1.91687	0.0552548	0.429682		NO
Map1b	968.471	0.647641	0.337986	1.91618	0.0553422	0.429705		NO
Ocln	1929.93	-0.902472	0.470991	-1.91611	0.0553507	0.429705		NO
Meg3	64.0982	-0.922693	0.481833	-1.91496	0.0554972	0.430601		NO
Galnt7	1065.2	0.44504	0.232506	1.9141	0.0556069	0.43121		NO
Hip1	1215.99	0.648259	0.33881	1.91334	0.0557044	0.431724		NO
Pmpca	2311.91	0.442829	0.23153	1.91262	0.0557965	0.432196		NO
Mafa	65.9474	0.759887	0.397539	1.91148	0.0559432	0.43309		NO
Alkbh5	4166.65	0.357459	0.187042	1.91111	0.05599	0.433211		NO
Nceh1	1239.53	0.786315	0.411533	1.9107	0.0560436	0.433383		NO
Rpl27	18735.5	0.304961	0.159679	1.90984	0.0561542	0.433996		NO
Icmt	3133.81	0.340987	0.178576	1.90948	0.0562007	0.434113		NO
Marveld1	1261.13	0.656647	0.344395	1.90667	0.0565635	0.436672		NO
Mpp2	103.462	-0.567167	0.297553	-1.9061	0.0566372	0.436753		NO
Stk17b	4356.84	0.739523	0.38793	1.90633	0.0566072	0.436753		NO
Ppp1r15a	6523.45	0.547131	0.28712	1.90558	0.0567042	0.436783		NO
Tdrp	46.5279	-0.729109	0.382588	-1.90573	0.0566853	0.436783		NO
Heyl	21.7856	-0.929559	0.487926	-1.90512	0.0567643	0.436888		NO
Rdh12	354.414	-0.819631	0.430254	-1.90499	0.0567809	0.436888		NO
Clip4	733.953	-0.889396	0.467018	-1.90441	0.0568563	0.436982		NO
Heatr5b	904.957	0.33681	0.176856	1.90443	0.0568539	0.436982		NO
Zfp85	34.9921	-0.812988	0.427015	-1.90389	0.0569249	0.437266		NO
Lrrc8a	2021.99	0.561397	0.294937	1.90345	0.0569821	0.437463		NO
Adamts1	48938.6	0.819945	0.431014	1.90236	0.057124	0.437946		NO
Clrn3	77.185	0.944603	0.496637	1.902	0.0571715	0.437946		NO
Eif4ebp1	1072.36	0.4757	0.250094	1.90209	0.0571596	0.437946		NO
Grin1	36.5282	0.852228	0.447907	1.90269	0.0570811	0.437946		NO
Csnk1e	1774.05	-0.523437	0.275309	-1.90127	0.0572661	0.438185		NO
Tmigd1	1155.29	0.800494	0.421004	1.90139	0.0572506	0.438185		NO
Vsig8	83.4816	-0.899668	0.473314	-1.90079	0.0573301	0.438433		NO
Gna15	914.423	0.623832	0.328334	1.89999	0.0574343	0.438987		NO
Tpi1	28743.6	0.517525	0.272471	1.89938	0.0575147	0.439359		NO
Ddt	279.199	0.382998	0.201779	1.89811	0.057682	0.439667		NO
Gm16982	45.0711	-0.688924	0.362829	-1.89876	0.0575962	0.439667		NO
Gsn	10049.4	-0.477756	0.251689	-1.8982	0.0576697	0.439667		NO
U2af1	2047.5	-0.353104	0.186011	-1.8983	0.0576568	0.439667		NO
Emc10	1835.24	0.445501	0.23475	1.89777	0.0577265	0.439763		NO
Acaa2	3538.58	-0.614072	0.323753	-1.89673	0.0578636	0.439892		NO
Prss22	703.625	-0.936121	0.493621	-1.89644	0.0579022	0.439892		NO
Rnf219	376.654	-0.453572	0.239148	-1.89662	0.0578782	0.439892		NO
Rps15	20658.2	0.369867	0.194968	1.89707	0.057819	0.439892		NO
Tmcc3	5289.01	-0.803109	0.423467	-1.89651	0.0578927	0.439892		NO
Ifi44	41.7314	-0.892167	0.470596	-1.89583	0.0579831	0.440264		NO
Lmnb1	1094.67	-0.441851	0.233146	-1.89516	0.0580705	0.440445		NO
Mt4	93.9995	-0.870585	0.459368	-1.89518	0.0580685	0.440445		NO
Calr	22923.3	0.357406	0.188625	1.8948	0.0581188	0.44057		NO
Dsg1a	4659.96	-0.922785	0.487255	-1.89385	0.0582455	0.441289		NO
Fgf11	34.1241	-0.712546	0.376826	-1.89091	0.0586358	0.443408		NO
Lgalsl	1351.09	-0.584218	0.308959	-1.89093	0.0586342	0.443408		NO
Map2k2	2744.46	0.341555	0.180589	1.89134	0.0585788	0.443408		NO
Rhoj	95.0853	-0.706098	0.373442	-1.89078	0.0586534	0.443408		NO
9330159M07Rik	45.5016	0.67966	0.359785	1.88908	0.0588817	0.444129		NO
Fkbp5	1182.1	-0.709765	0.375762	-1.88887	0.0589092	0.444129		NO
Gsdma	112.407	-0.906007	0.479599	-1.88909	0.0588793	0.444129		NO
Rab44	75.4608	-0.785659	0.415737	-1.8898	0.0587849	0.444129		NO
Rrp15	1665.06	-0.39517	0.209158	-1.88934	0.0588468	0.444129		NO
Aox1	151.115	0.595413	0.315507	1.88716	0.0591388	0.444328		NO
Camsap2	9897.53	0.52932	0.280519	1.88693	0.05917	0.444328		NO
Cnbd2	26.9455	0.626794	0.332248	1.88652	0.0592245	0.444328		NO
Fam19a5	56.7159	-0.866963	0.459323	-1.88748	0.0590956	0.444328		NO
Hdlbp	10174.1	0.336727	0.178474	1.8867	0.0592006	0.444328		NO
Mgat5b	54.8143	-0.590141	0.312736	-1.88703	0.0591568	0.444328		NO
Prkar1b	29.3536	-0.785293	0.416245	-1.88661	0.0592124	0.444328		NO
Slc2a4rg-ps	122.966	-0.495605	0.262506	-1.88797	0.0590296	0.444328		NO
Ulk1	1161.92	0.303916	0.161002	1.88765	0.0590723	0.444328		NO
Exoc3l4	73.6547	-0.685173	0.363269	-1.88613	0.0592769	0.44448		NO
Jmjd6	1285.19	0.42958	0.227864	1.88525	0.0593966	0.444921		NO
Ptprz1	2062.49	0.90707	0.481148	1.88522	0.0594	0.444921		NO
9230116N13Rik	35.0703	0.696054	0.369298	1.8848	0.0594566	0.445022		NO
Atrnl1	2085.59	0.269284	0.142896	1.88448	0.0595007	0.445022		NO
C1qtnf6	27.2714	-0.848793	0.45043	-1.88441	0.0595099	0.445022		NO
Sema6d	1130.31	0.886947	0.470777	1.88401	0.0595638	0.445184		NO
Cdadc1	484.623	-0.417928	0.22193	-1.88315	0.0596804	0.445575		NO
Lztfl1	714.903	0.338235	0.179606	1.8832	0.059673	0.445575		NO
Rps13	22588.7	0.294513	0.15643	1.88272	0.0597383	0.445767		NO
Hoxc6	39.5127	0.921058	0.489435	1.88188	0.0598523	0.446271		NO
Zfp882	44.3236	-0.638811	0.339478	-1.88175	0.0598703	0.446271		NO
Cul7	956.583	0.427375	0.227349	1.87982	0.0601324	0.447742		NO
Zfp39	55.9327	-0.750286	0.399125	-1.87983	0.0601314	0.447742		NO
Prdm10	384.026	0.461426	0.245545	1.87919	0.0602188	0.448144		NO
Plscr1	1007.33	0.640018	0.340651	1.8788	0.0602711	0.448293		NO
Coro2a	482.666	0.659146	0.351105	1.87735	0.0604707	0.448949		NO
Ifnlr1	306.285	-0.355267	0.189214	-1.87759	0.0604372	0.448949		NO
Las1l	889.025	-0.453341	0.241558	-1.87674	0.060554	0.448949		NO
Lyst	1575.98	-0.451847	0.240715	-1.8771	0.0605039	0.448949		NO
Mcf2l	226.317	-0.717368	0.382127	-1.8773	0.0604768	0.448949		NO
Slc45a4	281.605	0.398241	0.212196	1.87676	0.0605504	0.448949		NO
Gdap2	742.694	0.242101	0.129067	1.87578	0.0606861	0.449688		NO
S100a16	9476.84	-0.398744	0.21264	-1.87521	0.0607638	0.450023		NO
Sema4d	529.805	0.604916	0.322676	1.87469	0.0608358	0.45016		NO
St3gal6	361.885	0.743996	0.396882	1.8746	0.0608474	0.45016		NO
2310033P09Rik	300.053	-0.309628	0.16521	-1.87414	0.0609107	0.450387		NO
Dnah2	116.373	-0.893126	0.477002	-1.87237	0.0611548	0.451292		NO
Gm1943	337.731	-0.437611	0.233786	-1.87184	0.0612286	0.451292		NO
Mx2	74.5708	-0.854301	0.456388	-1.87187	0.061224	0.451292		NO
Spata7	70.1696	-0.641816	0.342709	-1.87277	0.0611	0.451292		NO
Upb1	69.4442	-0.845501	0.451509	-1.87261	0.0611222	0.451292		NO
Vps18	862.16	0.516903	0.276089	1.87224	0.0611741	0.451292		NO
App	20623.4	0.285028	0.152319	1.87126	0.0613096	0.451328		NO
Pitpna	2330.33	0.316959	0.169394	1.87114	0.0613254	0.451328		NO
Tfr2	21.8452	-0.969019	0.517888	-1.8711	0.0613313	0.451328		NO
Ccl27a	337.922	-0.836913	0.44749	-1.87024	0.0614507	0.451863		NO
Itga11	40.9447	-0.759594	0.406177	-1.8701	0.0614693	0.451863		NO
Etnk1	2520	0.676286	0.361743	1.86952	0.0615502	0.452173		NO
Snord45b	37.9027	-0.513949	0.274937	-1.86933	0.0615769	0.452173		NO
Gpr116	196.796	-0.767612	0.41079	-1.86862	0.0616754	0.452177		NO
Mif	6424.29	0.445246	0.238258	1.86875	0.0616569	0.452177		NO
Tmem132c	24.5251	-0.859017	0.459607	-1.86903	0.0616191	0.452177		NO
Il1r1	569.795	-0.418648	0.224213	-1.86719	0.0618749	0.452471		NO
Kctd3	2040.93	-0.380077	0.203459	-1.86808	0.0617513	0.452471		NO
Reep5	3389.64	-0.391804	0.209767	-1.8678	0.0617893	0.452471		NO
Scd3	50.7331	-0.883721	0.473296	-1.86716	0.0618789	0.452471		NO
Supt3	59.7689	-0.481742	0.257955	-1.86754	0.061826	0.452471		NO
Tmprss7	37.3547	-0.782236	0.419006	-1.86689	0.0619174	0.452513		NO
Nars2	533.704	0.317022	0.169944	1.86545	0.0621189	0.453747		NO
2210013O21Rik	243.625	0.282267	0.151388	1.86452	0.0622482	0.454274		NO
Glb1	346.871	0.632511	0.339246	1.86446	0.0622568	0.454274		NO
Adamtsl5	341.796	0.607098	0.325696	1.864	0.0623217	0.454509		NO
Adarb1	2814.35	0.58478	0.313873	1.86311	0.0624465	0.455158		NO
Mirlet7bhg	105.565	-0.844762	0.453466	-1.8629	0.0624766	0.455158		NO
Cachd1	526.227	-0.650306	0.349137	-1.86261	0.0625176	0.455218		NO
Rev1	1150.6	0.441716	0.237299	1.86143	0.0626828	0.456181		NO
Cul9	175.469	-0.589351	0.31691	-1.85968	0.0629306	0.457061		NO
Rhobtb1	151.682	-0.568546	0.30567	-1.86	0.0628857	0.457061		NO
Slc25a30	508.955	0.355922	0.191417	1.85941	0.0629689	0.457061		NO
Slc7a6	1954.47	-0.727311	0.39114	-1.85947	0.0629611	0.457061		NO
Smarca5-ps	67.8804	0.531806	0.285911	1.86004	0.0628798	0.457061		NO
Ufd1l	1643.52	0.222312	0.119588	1.85898	0.0630299	0.457264		NO
2410016O06Rik	917.413	-0.299387	0.161152	-1.8578	0.0631979	0.45784		NO
Emd	1773.79	0.315749	0.169987	1.85749	0.0632416	0.45784		NO
Rps20	37015.1	0.340637	0.183366	1.85769	0.063213	0.45784		NO
Tmx4	990.57	0.469629	0.252773	1.85791	0.0631819	0.45784		NO
Prkg1	39.154	-0.921719	0.496442	-1.85665	0.0633607	0.458463		NO
Insl6	118.255	0.589925	0.31788	1.85581	0.0634804	0.459089		NO
Map3k15	143.289	0.854361	0.46056	1.85505	0.0635896	0.459638		NO
Fam71f2	31.0131	0.863822	0.465876	1.85419	0.0637121	0.460284		NO
Acbd5	1922.45	0.412737	0.222667	1.8536	0.0637959	0.460649		NO
2310010J17Rik	55.0286	0.480514	0.259523	1.85153	0.0640938	0.462168		NO
Rassf9	421.995	-0.793551	0.42859	-1.85154	0.0640921	0.462168		NO
Sema6a	244.887	-0.751376	0.405884	-1.85121	0.0641399	0.462168		NO
Tmem219	366.848	0.433863	0.234343	1.8514	0.0641122	0.462168		NO
Slc38a10	2481.21	0.3117	0.168434	1.85058	0.0642299	0.462405		NO
Snord96a	236.198	-0.381067	0.205925	-1.85051	0.0642396	0.462405		NO
Slc27a1	1734.6	-0.588497	0.318257	-1.84912	0.06444	0.463606		NO
Caml	751.119	-0.278881	0.150927	-1.84778	0.0646338	0.464517		NO
Prdm16	106.981	-0.653858	0.353832	-1.84794	0.0646117	0.464517		NO
Pla2g4e	1903.85	-0.917105	0.496448	-1.84734	0.0646985	0.464741		NO
Cbr3	1201.66	-0.660015	0.357389	-1.84677	0.0647806	0.464849		NO
Renbp	157.964	-0.649781	0.351806	-1.84699	0.0647491	0.464849		NO
Ccdc17	81.5405	0.514054	0.278409	1.8464	0.0648342	0.464992		NO
Stx19	44.5412	-0.764817	0.414298	-1.84605	0.0648843	0.465111		NO
Zfp955a	408.236	-0.458353	0.248339	-1.84568	0.0649388	0.46526		NO
Slc35e1	2753.45	0.3571	0.193511	1.84537	0.0649841	0.465344		NO
Cacna1h	55.4557	-0.89862	0.487078	-1.84492	0.0650491	0.465569		NO
Dnase1l2	33.4719	-0.595049	0.322589	-1.8446	0.0650954	0.465659		NO
B4galt1	4848.45	0.48019	0.260376	1.84422	0.0651516	0.465821		NO
Ckmt1	10411.7	0.495623	0.268823	1.84368	0.0652303	0.465862		NO
Olfm2	33.3597	-0.651958	0.353584	-1.84385	0.0652043	0.465862		NO
Tlcd1	227.954	-0.430712	0.23364	-1.84348	0.0652583	0.465862		NO
6430548M08Rik	2153.54	-0.603424	0.327764	-1.84103	0.0656173	0.46598		NO
Ccdc57	91.7966	-0.440883	0.239329	-1.84216	0.0654516	0.46598		NO
Celf4	366.619	0.47779	0.259307	1.84257	0.0653925	0.46598		NO
Col5a3	351.652	-0.898136	0.487748	-1.84139	0.0655641	0.46598		NO
Cyp21a1	25.7616	-0.861691	0.467633	-1.84267	0.0653777	0.46598		NO
Efhc1	22.9736	-0.614461	0.333654	-1.84161	0.0655322	0.46598		NO
Hexb	508.455	0.452181	0.245639	1.84084	0.0656453	0.46598		NO
Kcnq2	41.6111	-0.907143	0.492335	-1.84253	0.0653976	0.46598		NO
Mapk12	38.5205	-0.640837	0.347836	-1.84235	0.0654233	0.46598		NO
Mapre2	306.796	-0.546016	0.296558	-1.84118	0.065595	0.46598		NO
Ranbp6	816.879	-0.451649	0.245332	-1.84097	0.0656259	0.46598		NO
Rsph1	23.4005	0.716408	0.389343	1.84004	0.0657621	0.46657		NO
Lipm	512.852	-0.735254	0.399829	-1.83892	0.0659267	0.467499		NO
Casp1	1629.36	0.497699	0.270688	1.83865	0.0659669	0.467544		NO
Mest	71.9989	-0.707455	0.384823	-1.83839	0.0660049	0.467574		NO
Trip12	12372.5	0.278268	0.151386	1.83814	0.0660417	0.467595		NO
Pde2a	67.7978	-0.715594	0.389401	-1.83768	0.0661095	0.467836		NO
Pdhx	864.259	-0.354131	0.1928	-1.83678	0.066243	0.468542		NO
4632428N05Rik	489.459	-0.833474	0.454042	-1.83568	0.0664054	0.468933		NO
Abcc6	39.5557	-0.892496	0.486525	-1.83443	0.0665903	0.468933		NO
Ccdc106	69.9694	-0.566885	0.309117	-1.83389	0.066671	0.468933		NO
Ece1	6761.64	-0.364189	0.198573	-1.83403	0.0666499	0.468933		NO
Nucb1	2565.55	0.382161	0.208357	1.83417	0.0666293	0.468933		NO
Pgap2	1394.39	0.526914	0.287134	1.83508	0.0664938	0.468933		NO
Ppm1l	497.73	0.679692	0.370522	1.83442	0.0665923	0.468933		NO
Prkaa1	1194.22	0.312961	0.170483	1.83573	0.0663979	0.468933		NO
Scmh1	542.6	0.520076	0.283424	1.83498	0.0665089	0.468933		NO
Sfxn4	33.3654	0.676362	0.368483	1.83553	0.0664274	0.468933		NO
Wdr36	4108.92	0.313227	0.170691	1.83505	0.0664979	0.468933		NO
Acot11	85.3917	-0.669718	0.366184	-1.82891	0.0674124	0.468982		NO
Adcyap1r1	31.4042	-0.933801	0.509676	-1.83215	0.0669296	0.468982		NO
Arntl2	906.425	0.645631	0.352749	1.83029	0.0672073	0.468982		NO
Bckdk	1217	0.503426	0.27472	1.83251	0.0668759	0.468982		NO
Cbfa2t3	37.1775	-0.83343	0.455088	-1.83136	0.0670465	0.468982		NO
Cpox	1900.71	0.429629	0.235016	1.82809	0.0675365	0.468982		NO
Dpf3	24.0661	-0.883257	0.482981	-1.82876	0.0674355	0.468982		NO
Fmnl1	32.2494	-0.740592	0.40437	-1.83147	0.06703	0.468982		NO
Gm14440	59.1439	0.747754	0.408327	1.83126	0.0670613	0.468982		NO
Hpn	109.638	-0.705129	0.38546	-1.82932	0.0673519	0.468982		NO
Kcna1	22.5878	-0.756417	0.412648	-1.83308	0.0667904	0.468982		NO
Kif5c	84.9091	-0.718493	0.392307	-1.83145	0.067033	0.468982		NO
Med12	835.456	0.304861	0.166751	1.82824	0.0675131	0.468982		NO
Pla2g2f	1063.05	-0.876646	0.479372	-1.82874	0.0674389	0.468982		NO
Prss53	309.312	-0.826324	0.451708	-1.82933	0.0673496	0.468982		NO
Rpl15	28935.9	0.292192	0.159582	1.83099	0.0671019	0.468982		NO
Scn10a	26.7641	-0.947631	0.516913	-1.83325	0.0667651	0.468982		NO
Sema6c	36.9246	-0.624315	0.341461	-1.82836	0.067495	0.468982		NO
Smad7	1493.5	0.450368	0.246182	1.82941	0.0673382	0.468982		NO
Sobp	29.0013	0.922047	0.504008	1.82943	0.0673354	0.468982		NO
Tax1bp1	12352.8	0.330226	0.180372	1.83081	0.067129	0.468982		NO
Tmem203	145.117	0.511448	0.27969	1.82862	0.0674564	0.468982		NO
Trnp1	173.308	-0.6767	0.369327	-1.83225	0.0669138	0.468982		NO
Trp53i13	172.554	-0.333029	0.182023	-1.8296	0.0673094	0.468982		NO
Urah	8447.39	0.442297	0.241965	1.82794	0.0675589	0.468982		NO
Vamp2	83.3286	-0.545488	0.297523	-1.83343	0.0667389	0.468982		NO
Gm1821	1009.84	0.452891	0.247813	1.82755	0.0676164	0.469146		NO
Snx9	1410.33	0.478734	0.262032	1.827	0.0676992	0.469485		NO
Pkhd1	30.4982	-0.930887	0.50983	-1.82588	0.0678685	0.470424		NO
[truncated: 22,065 more rows]
