# Supplementary material for: Loss of Dnmt3a and Dnmt3b does not affect epidermal homeostasis but promotes squamous transformation through PPAR-γ
Source: eLife journal article supplement (doi:10.7554/elife.21697), 2017-04-20
Supplement: supp [file elife-21697-supp-v1.zip › elife_poa_e21697_Supplementary_File_2.xlsx]

## Sheet: CPM_values_IFE_BULGE_RNA_seq
	104_WT_BULGE	117_WT_BULGE	118_WT_BULGE	122_KO_BULGE	105_KO_BULGE	123_KO_BULGE				104_WT_IFE	107_WT_IFE	117_WT_IFE	118_WT_IFE	105_KO_IFE	106_KO_IFE	122_KO_IFE	123_KO_IFE
0610005C13Rik	0	0	0.191714	0	0	0				0.0443936	0.0255467	0	0.0496019	0.0300484	0.102328	0.0594046	0
0610007P14Rik	32.676	37.6762	37.2693	37.2656	33.86	29.2437				24.8493	22.4556	24.443	20.2376	26.082	25.0193	26.2865	19.7958
0610009B22Rik	18.8422	18.9304	13.6117	16.6987	20.3284	16.0113				14.9384	13.1821	13.812	10.9868	15.535	12.612	12.267	9.7431
0610009L18Rik	2.16577	1.77126	0.805201	2.22138	1.99543	1.55481				0.821282	0.843042	0.795235	0.545621	0.901453	1.07445	0.683153	0.536696
0610009O20Rik	40.554	41.4771	44.9379	46.7256	43.5877	47.4384				44.0606	45.1411	44.2402	46.0554	49.5198	47.1989	48.6523	43.5549
0610010B08Rik	0.703875	0.701125	1.53372	0.957492	1.37186	1.0586				0.677002	0.536481	0.460399	0.372014	0.480775	0.665134	0.65345	0.227064
0610010F05Rik	22.524	19.1149	20.2067	17.2731	16.8988	16.3752				16.2592	18.2915	16.9929	15.3766	14.1228	17.2167	19.9896	12.7981
0610010K14Rik	47.8635	45.1672	55.7506	44.1595	44.0242	44.428				20.3212	18.3936	20.3413	22.2217	25.9618	26.3751	22.8708	24.8532
0610011F06Rik	12.02	12.5833	8.85721	12.8304	14.5916	16.0113				3.79565	3.67873	4.05988	3.86895	4.53731	5.32107	3.8613	4.19036
0610012G03Rik	13.2653	13.6904	13.19	13.9028	13.625	11.9754				9.65561	8.94135	12.2215	9.27556	11.2982	12.8422	9.97997	9.22704
0610030E20Rik	92.2888	80.0021	89.1089	80.3144	87.7677	87.3342				95.868	91.6872	78.226	64.7057	81.1908	84.165	91.2751	69.4402
0610031J06Rik	91.9368	81.6257	83.1657	87.8594	89.389	86.6064				69.2762	56.5349	65	70.8316	70.764	68.5855	62.0184	68.243
0610031O16Rik	0	0	0	0	0	0				0	0	0	0	0	0	0	0
0610037L13Rik	33.786	37.1227	36.3491	35.4272	39.4721	31.2286				26.5807	24.7803	26.9124	23.3129	26.5027	28.831	25.7816	23.1192
0610038B21Rik	0.324865	0.258309	0.191714	0.459596	0.374143	0.363893				0.21087	0.22992	0.167418	0.0992039	0.0901453	0.255821	0.297023	0.123853
0610039K10Rik	0.0541442	0.0369013	0	0.0382997	0	0				0.0221968	0	0.0418545	0.0744029	0.0600968	0.0511641	0.0594046	0.0206422
0610040B10Rik	1.8409	1.03324	1.76377	1.03409	1.27832	1.52173				1.07654	0.791948	0.585962	1.09124	0.600968	0.972118	0.980176	0.57798
0610040F04Rik	1.43482	1.07014	0.651829	0.612795	1.3095	0.727785				0.299657	0.204374	0.209272	0.372014	0.0600968	0.179074	0.237618	0.330274
0610040J01Rik	0.0541442	0	0	0.153199	0.187072	0				0.0443936	0.0255467	0.0418545	0	0.0901453	0.102328	0.0297023	0.0619265
0610043K17Rik	1.73261	0.959434	1.45703	1.41709	1.71482	1.5879				0.332952	0.383201	0	0.272811	0.210339	0.383731	0.207916	0.392201
1010001N08Rik	0.0812163	0.0738026	0	0.0382997	0.155893	0.165406				0.21087	0.22992	0.251127	0.124005	0.450726	0.434895	0.356427	0.206422
1100001G20Rik	0.460226	0	1.11194	0.229798	0.748286	0.29773				0.654806	0.510934	0.251127	0.744029	0.721162	0.665134	0.801962	0.57798
1110001J03Rik	5.57685	5.46139	7.51521	7.12374	5.92393	6.71547				3.98433	4.24076	4.26915	4.48897	4.92794	6.21644	4.15832	4.02522
1110002L01Rik	16.0267	14.3177	11.7329	10.992	17.4912	12.6039				12.741	12.569	10.8403	7.34109	10.2165	10.5398	10.4552	8.91741
1110004E09Rik	17.5427	25.425	20.7435	21.1414	15.7764	15.6805				16.6143	17.1929	18.6252	12.6485	18.5098	19.2889	16.663	12.7981
1110004F10Rik	93.1822	90.0023	89.4923	104.52	91.7586	85.1178				95.2798	83.9976	85.7598	88.0186	80.4396	82.937	86.1366	77.9241
1110006O24Rik	0.595586	0.811829	0.805201	0.765993	0.467679	0.496217				0.543822	0.459841	0.251127	0.347213	0.600968	0.818626	0.356427	0.28899
1110007C09Rik	10.9371	13.0631	15.5289	14.822	15.9946	15.4158				6.85881	8.02167	8.41274	9.96999	9.31501	9.79793	9.0295	10.7133
1110008F13Rik	50.7331	57.8244	54.5619	49.4449	50.1664	56.1387				72.3727	60.1625	79.9839	63.0688	67.2183	76.5671	68.0182	59.7178
1110008L16Rik	17.7864	15.8676	19.6699	14.7071	18.8319	16.8714				27.1578	28.459	23.7315	24.3793	22.356	23.5867	22.4549	21.4059
1110008P14Rik	16.2703	19.2256	14.6853	14.9369	13.2197	13.1994				8.20172	7.86839	9.8358	8.35792	8.23327	12.1259	10.2473	8.91741
1110012L19Rik	29.5627	30.3698	23.4275	29.4907	30.2744	26.9281				26.6029	24.8825	26.5357	22.5193	22.3861	24.0727	22.752	21.7362
1110015O18Rik	0	0	0	0	0	0				0	0	0	0	0	0	0	0
1110017D15Rik	0.406081	0.516618	0.345086	0.0382997	0.124714	0.29773				0.133181	0.0766402	0.167418	0.24801	0.120194	0.0767462	0.0891069	0.185779
1110019D14Rik	5.00834	3.91154	4.40943	4.36616	5.48743	4.20131				2.92998	3.04006	2.8461	1.66166	2.67431	2.73728	3.47517	1.63073
1110020A21Rik	1.40775	1.03324	1.53372	1.68519	1.09125	1.25708				0.83238	1.17515	0.878943	0.744029	0.901453	1.12561	1.15839	1.01147
1110025L11Rik	0	0	0	0	0	0				0	0	0	0	0	0.0511641	0	0
1110028F11Rik	1.27239	1.29155	1.38034	0.957492	1.65247	1.85254				2.1087	2.12038	1.59047	1.51286	1.47237	1.63725	1.51482	1.58945
1110028F18Rik	0	0	0	0	0	0				0.0110984	0.0255467	0	0.0496019	0.0300484	0.0511641	0	0.103211
1110032A03Rik	20.6831	20.3695	22.1238	23.8224	24.2881	18.8563				13.4735	12.9266	12.8493	10.2428	12.8006	13.1748	12.8908	10.2798
1110032F04Rik	0	0	0	0	0.0311786	0.0992434				0.0110984	0.0255467	0.125563	0	0.150242	0.12791	0.118809	0.103211
1110034G24Rik	10.3145	6.38393	9.43235	8.88552	10.3201	11.4461				7.44703	7.74066	5.77591	6.10104	5.91954	7.49554	5.91076	5.82109
1110036E04Rik	0.0270721	0	0	0.0765993	0.0311786	0				0.0110984	0	0	0	0.0300484	0	0	0
1110037F02Rik	105.635	87.493	95.3588	84.9104	97.1525	95.9023				99.3751	103.873	86.3876	87.1754	85.3375	81.53	85.0971	74.4769
1110038B12Rik	34.3545	41.7723	34.2785	30.3333	29.152	27.3581				30.2542	23.784	28.754	32.9109	29.2672	36.6335	25.9598	30.9426
1110038F14Rik	26.3682	30.9233	28.2971	28.1886	31.4592	25.5386				16.4034	16.682	16.9092	16.9143	18.3596	20.3889	18.8907	16.0802
1110046J04Rik	1.27239	1.18084	1.45703	1.41709	1.43422	1.65406				0.721396	1.02187	0.544108	0.446417	0.510823	0.613969	0.564343	0.619265
1110051M20Rik	23.5798	20.4433	26.2265	27.4992	23.7581	28.1851				28.4674	26.5175	26.9124	28.4963	23.1373	25.5565	22.7817	26.2775
1110054M08Rik	9.39402	9.44674	8.32041	8.34933	11.7543	8.79959				3.21854	3.04006	2.76239	3.34813	3.81615	4.29779	2.88112	2.99311
1110057K04Rik	58.5299	51.219	56.8242	59.7475	62.5131	59.4468				66.7236	65.2719	60.2704	57.8854	67.8794	68.9692	71.4934	59.2843
1110058L19Rik	10.3957	13.1738	8.32041	12.6772	9.88361	8.46877				7.22506	6.05457	6.86413	5.233	6.55056	7.75136	5.67314	4.56192
1110059E24Rik	20.9809	21.9932	22.4306	26.6183	24.5376	21.8336				18.7452	20.3863	17.4952	15.3518	16.9473	16.8842	17.9105	13.1491
1110059G10Rik	19.8168	19.8529	21.3186	19.9924	19.8608	20.0472				15.6044	15.0215	16.1977	11.7309	13.0711	13.7887	16.8412	11.0642
1110065P20Rik	10.0167	10.3324	8.58881	8.34933	8.35586	8.13796				4.67243	4.44513	7.19897	5.97703	5.67915	7.00949	4.78207	5.71788
1190002F15Rik	3.08622	3.94844	7.63024	10.3026	5.30036	2.91114				5.38272	5.39036	4.26915	4.61298	6.46041	7.08623	3.9504	2.55963
1190002N15Rik	32.7031	43.4328	30.3292	27.4226	30.025	28.516				49.9539	47.3892	45.0354	45.7082	49.9405	48.2478	73.6617	57.3233
1190003K10Rik	0	0	0	0	0	0				0	0	0	0	0	0	0	0
1190005I06Rik	9.33987	10.6276	10.621	13.5581	10.2578	12.4385				0.954462	1.22624	1.3812	1.41365	0.931501	1.17677	1.48511	0.805044
1190007I07Rik	5.52271	4.53886	5.90481	5.47685	6.5475	4.36671				3.81785	4.21521	3.13908	2.5049	4.11663	4.24662	4.66326	2.45642
1200014J11Rik	59.3962	61.1086	59.0864	58.1006	59.8941	59.5461				64.8812	68.874	59.6426	58.8527	62.08	55.1549	62.2857	51.4609
1300002E11Rik	35.4915	25.4619	29.2556	30.3333	44.2112	32.5849				28.079	25.0102	19.4623	13.5413	21.9954	20.4145	27.6825	12.6124
1300002K09Rik	5.8205	2.95211	4.06435	2.02988	3.2114	4.79677				0.055492	0.281014	0.0837089	0.0744029	0.210339	0.102328	0.207916	0.144495
1300017J02Rik	0	0	0	0	0.0311786	0.0992434				0.0665904	0.0510934	0	0	0.120194	0.0255821	0.0297023	0.0412843
1500004A13Rik	0.216577	0.295211	0.191714	0.114899	0.405322	0.661623				0.144279	0.357654	0.209272	0.124005	0.0600968	0.179074	0.207916	0.268348
1500009C09Rik	0	0	0	0	0.0623572	0.0661623				0	0	0	0.0496019	0.0300484	0	0	0
1500009L16Rik	0.13536	0.147605	0.153372	0.191498	0.187072	0.132325				0.0221968	0	0	0.024801	0	0	0.0297023	0.0206422
1500011B03Rik	10.7206	9.37293	10.2759	10.3792	10.5072	10.7845				5.527	5.0838	3.47392	5.35701	4.29692	4.47686	5.46522	4.14907
1500011K16Rik	12.8051	17.565	14.6853	18.1157	13.5003	14.1257				6.31499	6.97425	8.915	7.91151	8.32341	9.64444	8.34634	8.25686
1500012F01Rik	45.5082	49.8906	52.7982	44.1595	50.2911	44.2957				60.8192	57.5823	63.7862	68.7979	67.038	80.3277	56.1967	60.5434
1500012K07Rik	0.189505	0.295211	0.153372	0	0.187072	0.165406				0.122082	0.0766402	0.125563	0.124005	0.0901453	0.0511641	0.148511	0.123853
1500015A07Rik	11.3703	9.07772	7.43852	7.27694	8.41822	6.41774				6.80332	6.51441	7.65936	5.97703	7.66235	8.95372	5.88105	8.54585
1500015L24Rik	0	0	0	0	0.0311786	0				0.0110984	0	0.0418545	0.024801	0	0	0	0
1500015O10Rik	0.13536	0.184507	0	0	0	0				0	0	0	0	0	0.0255821	0	0
1500017E21Rik	0	0	0	0.268098	0	0				0.122082	0.0766402	0.0837089	0.024801	0	0.0255821	0.0297023	0.144495
1600002D24Rik	0.162433	0	0.421772	0	0.187072	0				0.743593	0.587575	0.37669	0.496019	0.540872	0.639552	0.891069	0.639907
1600002H07Rik	18.2466	17.0484	18.1745	20.3754	19.3307	16.1436				10.2549	11.2661	9.41725	9.59797	11.2982	10.6933	11.9403	9.88759
1600002K03Rik	10.7476	9.55744	7.09343	9.30682	10.1642	9.39505				6.41488	5.31372	9.79394	6.10104	6.97123	7.36763	7.30676	5.61467
1600010M07Rik	0	0.0738026	0	0	0.0311786	0				0.0221968	0	0	0	0.0600968	0	0	0.0206422
1600012H06Rik	49.4878	44.7613	41.0269	36.9975	41.8105	41.2191				35.0265	33.8494	31.7257	24.677	26.5929	28.1659	30.1181	22.6857
1600014C10Rik	17.3532	23.0633	20.7435	18.5753	22.3239	17.8969				23.2733	20.0286	22.8944	19.3448	22.987	21.668	24.8311	21.7981
1600014C23Rik	0	0	0	0	0	0				0	0.0255467	0	0	0	0.0255821	0	0
1600014K23Rik	0.0812163	0	0	0	0	0				0.0221968	0	0	0	0.0600968	0	0	0
1600015I10Rik	0	0	0	0	0	0				0	0.0255467	0.0418545	0.024801	0	0	0.0297023	0.0206422
1600016N20Rik	19.167	14.4284	26.3416	16.8136	20.609	15.1842				9.38925	9.45229	9.45911	13.1693	10.2766	8.16068	8.10872	7.65824
1600019K03Rik	0	0	0	0	0	0				0	0	0	0	0	0	0	0
1600020E01Rik	30.1854	25.1298	29.6007	20.9116	24.5687	23.5207				19.9438	25.4956	19.1275	16.3934	19.9822	23.3564	19.455	16.9266
1600023N17Rik	0.676802	0.405914	0.881886	0.765993	0.748286	0.396974				0.377346	0.255467	0.418545	0.173607	0.330533	0.639552	0.534641	0.247706
1600025M17Rik	0	0	0	0	0	0				0	0	0	0	0	0	0	0
1600027J07Rik	0	0	0	0	0.0623572	0				0	0	0	0	0	0	0	0
1600029I14Rik	0	0	0	0	0.0311786	0				0	0	0	0	0	0	0	0
1600029O15Rik	0.216577	0.405914	0.0383429	0.153199	0	0.0992434				0.199771	0.0255467	0.125563	0.0744029	0.0901453	0.230239	0.207916	0.144495
1700001C02Rik	0	0	0	0	0	0				0	0	0	0	0	0	0	0
1700001C19Rik	0.0270721	0.147605	0.0766858	0.114899	0.187072	0.29773				0.110984	0.0510934	0.125563	0.0744029	0.0600968	0.12791	0.178214	0.0206422
1700001D01Rik	0	0	0	0	0	0				0	0	0	0	0	0	0	0
1700001F09Rik	0	0	0	0	0	0				0	0	0	0	0	0	0	0
1700001G11Rik	0.324865	0.405914	0.191714	0.0765993	0.0623572	0.0661623				0.0665904	0.127734	0.125563	0.0496019	0.0300484	0.0255821	0	0.0412843
1700001G17Rik	0.379009	0.258309	0.421772	0.114899	0.530036	0.396974				0.177574	0.127734	0.0837089	0.124005	0.270436	0.153492	0.118809	0.227064
1700001J03Rik	0.108288	0.0369013	0.115029	0	0.0623572	0.0992434				0.177574	0.0510934	0.0837089	0.0744029	0.150242	0.102328	0.0297023	0.0619265
1700001J11Rik	0.433154	0.479717	0.115029	1.18729	0.561215	0.496217				0.399542	0.383201	0.418545	0.223209	0.300484	0.255821	0.445534	0.206422
1700001K19Rik	0	0	0	0	0	0				0.0110984	0	0.0418545	0.024801	0.0300484	0	0	0.0412843
1700001K23Rik	0	0	0	0	0	0				0	0	0	0	0	0	0	0
1700001L05Rik	4.08789	5.83041	7.01675	7.23864	7.17108	6.45082				3.15195	4.03638	3.85061	3.34813	3.93634	4.37453	4.18802	5.34632
1700001L19Rik	1.13703	0.516618	0.575143	0.459596	0.685929	0.694704				0.055492	0.0766402	0	0.0992039	0.0300484	0.102328	0.0594046	0.123853
1700001O22Rik	0.730947	0.442816	0.920229	0.536195	0.904179	0.396974				1.90892	1.25179	1.88345	2.4553	2.10339	2.35355	1.60392	2.16743
1700001P01Rik	0.189505	0	0.421772	0.306397	0.280607	0.0661623				0.288558	0.255467	0.251127	0.818432	0.300484	0.358149	0.267321	0.412843
1700003C15Rik	0	0	0	0	0	0				0	0	0	0	0	0	0	0
1700003D09Rik	0	0	0	0.0765993	0	0				0	0	0	0	0	0	0	0
1700003E16Rik	0.487298	0.664224	0.5368	0.574495	0.405322	0.992434				0.299657	0.281014	0.502253	0.545621	0.39063	0.409313	0.445534	0.330274
1700003E24Rik	0	0	0	0	0	0				0	0	0	0	0	0	0	0
1700003F12Rik	0.243649	0.0738026	0.383429	0.0382997	0.124714	0.132325				0.0665904	0.127734	0.0837089	0.223209	0.0600968	0.0511641	0.0891069	0.103211
1700003G13Rik	0.108288	0.147605	0.421772	0.114899	0.280607	0.132325				0.110984	0.0766402	0.125563	0.0744029	0.0901453	0.12791	0.0891069	0.0412843
1700003G18Rik	0	0.0738026	0	0	0	0.0330811				0.0332952	0	0	0	0	0.0255821	0	0
1700003H04Rik	0	0	0	0	0	0				0	0	0	0	0	0	0	0
1700003L19Rik	0	0	0	0	0	0				0	0	0	0	0	0	0	0
1700003M02Rik	0.0541442	0.0369013	0.230057	0	0.0935358	0				0.0221968	0	0	0	0	0	0	0
1700003M07Rik	0.703875	1.25464	2.30057	1.14899	0.779465	0.959353				0.821282	0.894135	0.544108	0.620024	0.510823	0.383731	0.683153	0.454127
1700003P14Rik	0	0	0	0	0	0				0	0	0	0	0	0	0	0.0412843
1700006A11Rik	0	0	0	0	0	0				0	0	0	0	0	0	0	0
1700006E09Rik	0	0	0	0	0	0				0	0	0	0	0	0	0	0
1700006F04Rik	0	0	0.0383429	0	0	0				0	0	0	0	0	0	0	0
1700006H21Rik	0	0	0	0	0	0				0	0	0	0	0	0	0	0
1700007B14Rik	0	0	0	0	0	0				0	0	0	0	0	0	0	0
1700007F19Rik	0	0	0	0	0.0311786	0				0	0	0	0	0	0	0	0
1700007G11Rik	0.0812163	0	0.0766858	0.153199	0.0311786	0.165406				0.221968	0.178827	0.209272	0.272811	0.300484	0.230239	0.0891069	0.165137
1700007J10Rik	1.05581	0.479717	0.690172	1.14899	0.810643	1.02552				0.521625	0.536481	0.334836	0.297612	0.450726	0.588387	0.38613	0.433485
1700007K09Rik	0.189505	0	0.153372	0	0.0311786	0.0661623				0.177574	0.332107	0.125563	0.297612	0.150242	0.306985	0.207916	0.185779
1700007K13Rik	4.68347	5.16618	4.79286	7.77483	4.98857	4.63136				1.3651	1.12406	1.04636	0.793631	1.41228	2.04656	1.09898	0.887613
1700007L15Rik	0.812163	1.25464	1.11194	0.919192	0.530036	0.760866				0.532723	0.383201	0.627817	0.719228	0.330533	0.409313	0.623748	0.392201
1700007P06Rik	0	0.110704	0	0	0	0.0330811				0.0998856	0.0766402	0.0418545	0.0496019	0.0300484	0	0.0297023	0.0825686
1700008F21Rik	0	0	0	0	0	0				0	0	0	0	0.0300484	0	0	0
1700008I05Rik	0	0	0	0	0	0				0	0	0	0	0	0	0	0
1700008J07Rik	3.32987	2.7676	2.87572	3.10227	2.36957	2.94422				2.64142	2.70795	1.71603	2.08328	2.13344	2.91636	2.13856	2.24999
1700008K24Rik	0	0	0	0	0	0				0	0	0	0	0	0	0	0
1700008O03Rik	0.108288	0.184507	0.115029	0.0382997	0.187072	0.198487				0.199771	0.22992	0.292981	0.272811	0.240387	0.255821	0.148511	0.227064
1700008P02Rik	0	0	0	0	0	0				0	0	0	0	0	0	0	0
1700009C05Rik	0	0	0	0	0	0				0	0	0	0	0	0	0	0
1700009J07Rik	0	0	0	0	0	0				0.321854	0.15328	0.0418545	0.297612	0.180291	0.12791	0.0891069	0.392201
1700009N14Rik	0	0	0	0	0	0				0	0	0	0	0	0	0	0
1700009P17Rik	1.02874	1.21774	1.80212	1.26389	1.15361	1.12476				0.455034	0.459841	0.460399	0.372014	0.39063	0.409313	0.683153	0.47477
1700010B08Rik	0	0	0	0	0.0623572	0.0330811				0.0443936	0.0255467	0.125563	0.0992039	0	0.0255821	0.0891069	0.123853
1700010D01Rik	0	0	0	0	0	0				0	0	0	0	0	0	0	0
1700010I02Rik	0.0270721	0	0	0	0	0				0.0332952	0	0	0.024801	0.0300484	0	0	0.0206422
1700010I14Rik	0	0	0	0	0	0				0	0	0	0	0.0300484	0.0511641	0	0
1700010J16Rik	0	0	0	0	0	0				0	0	0	0	0	0	0	0
1700010K23Rik	0	0	0	0	0	0				0	0	0	0	0	0	0	0
1700011A15Rik	0	0	0	0	0	0				0.0443936	0.127734	0.0837089	0.0496019	0.0600968	0.0255821	0	0.103211
1700011B04Rik	0	0	0	0	0	0				0	0	0	0	0.0300484	0	0	0
1700011E24Rik	0.13536	0	0	0	0	0.0992434				0.0665904	0.332107	0.0418545	0.198408	0.270436	0.230239	0.267321	0.268348
1700011H14Rik	0	0	0	0	0	0				0	0	0	0	0	0	0	0
1700011I03Rik	0	0	0	0	0	0				0	0	0	0	0	0	0	0
1700011L22Rik	0.0541442	0.110704	0.153372	0.0765993	0.0623572	0.132325				0.144279	0.0766402	0.418545	0.223209	0.150242	0.179074	0.356427	0.144495
1700011M02Rik	0	0	0	0	0	0				0	0	0	0	0	0	0	0
1700012A03Rik	0	0	0	0	0	0				0	0	0	0	0	0	0	0
1700012B07Rik	0	0	0	0	0	0				0	0	0	0	0	0	0	0
1700012B09Rik	0	0	0	0	0	0				0	0	0.0418545	0	0	0	0.0297023	0
1700012D01Rik	1.1641	1.43915	1.11194	0.880892	1.06007	1.32325				0.599314	0.510934	0.502253	0.545621	0.360581	0.332567	0.504939	0.412843
1700012D14Rik	3.65473	1.91887	3.91097	2.71928	3.55436	3.14271				1.47609	1.17515	0.878943	1.21525	0.96155	1.33027	1.3069	0.846328
1700012I11Rik	0	0	0	0	0	0				0	0	0	0	0	0	0	0
1700012L04Rik	0	0	0	0	0	0				0	0	0	0	0	0	0	0
1700012P22Rik	0.0812163	0	0	0	0.124714	0				0.432838	0.255467	0.711526	0.148806	0.811307	1.22794	0.445534	1.1766
1700013D24Rik	0	0	0	0	0	0				0	0	0	0	0	0	0	0
1700013F07Rik	0.0541442	0	0	0.0765993	0.0311786	0				0	0	0	0	0	0	0	0
1700013G24Rik	0	0	0.306743	0	0	0				0	0	0	0	0	0	0	0
1700013H16Rik	0	0	0.115029	0	0	0				0	0	0	0	0	0	0	0
1700015E13Rik	0	0	0	0	0	0				0	0	0	0	0	0.0255821	0	0
1700015F17Rik	0	0	0	0	0	0				0.0110984	0	0	0	0	0	0.0297023	0.0619265
1700015G11Rik	0	0	0	0	0	0				0	0	0	0	0	0	0	0
1700016C15Rik	0.379009	0.184507	0.0383429	0.114899	0.124714	0.132325				0.133181	0.0255467	0.125563	0.24801	0.0901453	0.102328	0.178214	0.0619265
1700016D06Rik	0.406081	0.258309	0.728515	0.306397	0.405322	0.496217				0.27746	0.383201	0.209272	0.24801	0.330533	0.102328	0.356427	0.103211
1700016G22Rik	0	0.110704	0.0383429	0	0.0311786	0				0.055492	0.0766402	0.0418545	0.396815	0.150242	0.204656	0.0891069	0.227064
1700016H13Rik	0.351937	0	0.0383429	0.153199	0.0311786	0.0330811				0.055492	0.0255467	0	0.0992039	0	0.102328	0.0594046	0
1700016K19Rik	0.920451	0.55352	0.920229	0.612795	0.311786	0.430055				0.0110984	0.0510934	0	0	0	0	0.0594046	0.0412843
1700016L04Rik	0.108288	0	0.115029	0	0	0.0330811				0.0221968	0	0	0.024801	0	0	0	0
1700016L21Rik	0	0	0	0	0	0				0	0	0	0	0	0	0	0
1700016P04Rik	0	0	0	0	0	0				0	0	0	0	0	0	0	0
1700017B05Rik	34.0296	25.9416	41.1803	24.8948	21.7003	25.3071				18.834	23.4263	27.8332	36.7798	29.778	23.8936	20.7916	52.8026
1700017D01Rik	0	0	0	0	0	0				0	0	0	0	0	0	0	0
1700017G19Rik	0	0	0	0	0	0				0	0	0	0	0	0	0	0
1700017J07Rik	0	0	0	0	0	0				0	0	0	0	0	0	0	0
1700017N19Rik	0	0	0	0	0	0				0	0	0	0	0	0	0	0
1700018A04Rik	0	0	0	0	0	0				0	0	0	0	0	0.0511641	0	0
1700018B08Rik	0	0	0	0	0.0311786	0.0330811				0.0665904	0	0	0.024801	0	0.0511641	0	0.0619265
1700018B24Rik	0	0	0	0	0	0				0	0	0	0	0	0	0	0
1700018C11Rik	0	0	0	0	0	0				0	0	0	0	0	0	0	0
1700018F24Rik	0	0	0	0	0	0				0	0	0	0	0	0	0	0
1700018G05Rik	0	0	0	0	0	0				0	0	0	0	0	0	0	0
1700018L02Rik	0.13536	0.110704	0.2684	0.268098	0.187072	0.198487				0.0887872	0.204374	0	0.148806	0.150242	0.0767462	0.0594046	0.0825686
1700019A02Rik	0	0	0	0.0382997	0.0311786	0				0.0443936	0.0255467	0.0418545	0	0.0600968	0	0.0297023	0
1700019B03Rik	0	0	0.2684	0.344697	0	0.0661623				0.0887872	0.127734	0.209272	0.347213	0.0300484	0.102328	0	0.227064
1700019B21Rik	0	0	0	0	0	0				0	0	0	0	0	0	0	0
1700019D03Rik	4.19618	2.02957	7.82195	2.33628	5.73686	8.73342				0.0332952	0	0	0.024801	0.150242	0	0.0594046	0.0206422
1700019E08Rik	0	0	0	0	0	0				0	0	0	0	0	0	0	0
1700019G17Rik	3.35694	4.05914	3.91097	5.36195	4.42736	4.66444				1.96442	1.86491	1.59047	1.26485	1.89305	1.73958	1.84154	1.73394
1700019G24Rik	0	0	0	0	0	0				0	0	0	0	0	0	0	0
1700019L03Rik	0.0270721	0	0.0383429	0	0	0.132325				0.0110984	0.0766402	0	0.0744029	0	0	0.0297023	0
1700019M22Rik	0	0	0	0	0	0				0	0	0	0	0	0	0	0
1700019N19Rik	0	0	0	0	0	0				0.0110984	0	0	0	0	0.0767462	0.0297023	0.0206422
1700019O17Rik	0.0270721	0	0	0	0	0				0.0221968	0	0	0.024801	0	0	0	0
1700020A23Rik	0	0	0	0	0	0				0	0	0	0	0	0	0	0
1700020D05Rik	1.62433	0.55352	1.45703	0.536195	0.935358	1.52173				0.0221968	0.0766402	0	0.024801	0.0300484	0	0.0297023	0
1700020G17Rik	0	0	0	0	0	0				0	0	0	0	0	0	0	0
1700020I14Rik	29.7793	29.5949	28.7572	31.2908	28.3413	31.2948				36.5248	34.4625	29.0888	23.4369	26.3525	26.8867	34.1279	22.4999
1700020L24Rik	0.13536	0.147605	0.0766858	0	0.280607	0.0661623				0.0443936	0.0766402	0.125563	0.124005	0.0901453	0.204656	0.0891069	0.0825686
1700020M21Rik	0	0	0	0	0	0				0	0	0	0	0	0	0	0
1700020N01Rik	0.13536	0	0	0	0.0311786	0.0330811				0	0	0	0	0	0.0255821	0	0
1700020N15Rik	0	0	0	0	0	0				0	0	0	0	0	0	0	0
1700020N18Rik	0.0270721	0	0	0.0382997	0	0				0.0110984	0.0510934	0	0	0.0600968	0	0	0
1700021F05Rik	14.9979	16.4211	13.7268	15.2433	13.1262	12.637				14.9606	13.5653	15.5699	12.5989	12.9809	13.7631	15.7125	10.6514
1700021F07Rik	0	0	0	0	0	0				0	0	0	0	0	0	0	0
1700021K19Rik	63.0509	53.6176	57.7827	62.2753	65.288	67.1217				64.4373	64.4544	56.5872	69.4923	70.0729	58.1224	60.1471	63.4953
1700021N21Rik	0	0	0	0	0	0				0	0	0	0	0	0	0	0
1700022A21Rik	0	0	0	0	0	0				0	0	0	0	0	0	0	0
1700022A22Rik	0	0	0	0	0	0				0	0	0	0	0	0	0	0
1700022E09Rik	0	0	0	0	0	0				0	0	0	0	0	0	0	0.0206422
1700022H16Rik	0	0	0	0	0	0				0	0	0	0	0	0	0	0
1700022I11Rik	0	0	0	0	0	0				0	0	0	0	0	0	0	0.0206422
1700023C21Rik	0	0	0	0	0	0				0	0	0	0	0	0	0	0
1700023E05Rik	0.324865	0.55352	0.613486	0.344697	0.311786	0.926272				0.0221968	0.0510934	0	0.0496019	0.0600968	0.0255821	0	0
1700023F02Rik	0	0	0	0	0	0				0	0	0	0	0.0300484	0	0	0
1700023F06Rik	2.95086	2.8414	5.02292	4.05976	3.24257	2.54725				0.21087	0.408747	0.167418	0.223209	0.150242	0.306985	0.237618	0.330274
1700023L04Rik	0.216577	0	0.191714	0.229798	0.155893	0.0992434				0	0.102187	0	0.0992039	0.0300484	0.0511641	0	0.0206422
1700024B18Rik	0	0	0	0	0	0				0	0	0	0	0	0	0	0
1700024F13Rik	0.270721	0.55352	0.306743	0.459596	0.498857	0.29773				0.188673	0.127734	0.167418	0.148806	0.210339	0.204656	0.148511	0.247706
1700024G13Rik	0	0	0	0	0	0				0	0	0	0	0	0	0	0
1700024P04Rik	0	0	0	0	0	0				0	0	0	0	0	0	0	0
1700024P16Rik	0	0.221408	0	0.153199	0.0311786	0				0.133181	0.281014	0.209272	0.0744029	0.0300484	0.204656	0.118809	0.144495
1700025B11Rik	0	0	0	0	0	0				0	0	0	0	0.0300484	0	0	0
1700025C18Rik	0	0	0	0	0	0				0	0	0	0	0	0	0	0
1700025F22Rik	0	0	0	0	0	0				0	0	0	0	0	0	0	0
1700025F24Rik	0	0	0	0	0	0				0	0	0	0	0	0	0	0
1700025G04Rik	21.3328	24.4287	21.5104	37.4954	19.4554	23.5207				121.195	131.029	115.56	88.0186	122.658	113.124	123.74	114.337
1700025K24Rik	0	0	0	0	0	0				0.0110984	0	0	0	0	0	0	0.0206422
1700025M24Rik	0	0	0	0	0	0				0.0110984	0	0	0	0	0	0	0
1700025N23Rik	3.16744	2.10338	2.87572	2.37458	3.46082	3.20887				3.08536	3.1167	2.59498	2.08328	3.03489	2.81403	3.8613	1.98165
1700026D08Rik	0	0	0	0	0	0				0	0	0	0	0	0.0511641	0	0
1700026D11Rik	0	0	0	0	0	0				0	0	0	0	0	0	0	0
1700026F02Rik	0	0	0	0	0	0.0661623				0	0	0	0	0	0	0	0
1700026L06Rik	0	0	0	0	0	0.0661623				0	0	0	0	0	0	0	0
1700027A15Rik	0.0541442	0	0	0	0	0				0	0	0	0	0	0	0	0
1700027F09Rik	0.0812163	0	0	0	0	0				0	0	0	0	0	0	0	0
1700027H10Rik	0	0	0	0	0	0				0	0	0	0	0	0	0	0
1700027I24Rik	0	0	0	0	0	0				0.0221968	0	0.0418545	0.024801	0	0	0	0.0206422
1700027J07Rik	0	0	0	0	0.0311786	0				0	0	0	0	0	0	0	0
1700028B04Rik	0	0	0	0	0	0				0	0	0	0	0	0	0	0
1700028D13Rik	0	0	0	0	0	0				0	0	0	0	0	0	0	0
1700028E10Rik	0.216577	0.516618	0.498458	0.344697	0.498857	0.595461				0.27746	0.408747	0.209272	0.0496019	0.240387	0.358149	0.237618	0.28899
1700028I16Rik	0.0812163	0.0369013	0.0383429	0.0382997	0.0623572	0				0.0665904	0.127734	0.0837089	0.024801	0.0901453	0.0511641	0.0297023	0.103211
1700028J19Rik	0.487298	0.738026	0.2684	0.459596	0.623572	0.363893				0.665904	0.510934	0.920798	0.818432	0.600968	0.588387	0.742557	0.47477
1700028K03Rik	0.0541442	0.0369013	0.345086	0	0.0311786	0				0	0.0255467	0	0.024801	0	0.0767462	0	0.0206422
1700028M03Rik	0	0	0	0	0.0311786	0				0	0	0	0	0	0	0	0
1700028P14Rik	0	0.0369013	0.2684	0.0382997	0	0				0	0.0510934	0	0	0.0300484	0	0	0
1700028P15Rik	0	0	0	0	0	0				0	0	0	0	0	0	0	0
1700029B22Rik	0	0	0	0	0	0				0	0	0	0	0	0	0	0
1700029F12Rik	0.0270721	0	0	0	0.0623572	0				0.0110984	0	0	0	0	0	0	0
1700029H14Rik	0	0	0	0	0.0623572	0				0.0443936	0.15328	0	0.0744029	0.0600968	0	0.0891069	0
1700029I15Rik	1.78676	1.58676	2.1472	1.64689	2.08897	1.65406				1.00995	1.27734	1.13007	1.14084	1.35218	1.714	0.980176	0.722475
1700029J03Rik	0	0	0	0	0.0311786	0				0	0	0	0.024801	0	0	0.0297023	0
1700029J07Rik	27.4511	26.4951	32.3231	34.8527	43.7747	35.3637				10.8209	14.2551	9.91951	8.10991	13.1011	13.1492	13.3066	7.80273
1700029M20Rik	0	0	0	0	0	0				0.355149	0.306561	0.544108	0.272811	0.330533	0.613969	0.178214	0.433485
1700029N11Rik	0	0	0	0	0	0				0	0	0	0	0	0	0	0
1700029P11Rik	0	0	0	0	0	0				0	0	0	0	0	0	0	0
1700030A11Rik	0	0	0	0	0	0				0	0	0	0	0	0	0	0
1700030C10Rik	0	0	0.115029	0.114899	0	0.0330811				0	0	0	0.024801	0.0300484	0.0255821	0	0
1700030F04Rik	0	0	0	0	0	0				0	0	0	0	0	0	0	0
1700030F18Rik	0	0	0	0	0	0				0	0	0	0	0	0	0	0
1700030J22Rik	1.78676	1.73436	1.15029	1.99158	1.46539	1.35633				1.04325	1.22624	0.920798	0.620024	1.29208	0.690716	0.831664	0.887613
1700030K09Rik	21.4411	20.7385	21.5487	19.1115	21.1391	21.4035				11.5312	11.1895	13.6864	10.8132	12.0795	12.4329	11.5245	10.0527
1700030L20Rik	0	0	0	0	0	0				0	0	0	0	0	0	0	0
1700030M09Rik	0	0	0	0	0	0				0	0	0	0	0	0	0	0
1700030N03Rik	0	0	0	0	0	0				0	0	0	0	0	0	0	0
1700030O20Rik	0	0	0	0.114899	0	0				0.0221968	0	0.0837089	0	0	0.0767462	0.0297023	0.0206422
1700031A10Rik	0	0	0	0	0	0				0	0.0510934	0	0	0	0.0255821	0	0.0206422
1700031F05Rik	0	0	0	0	0	0				0	0	0	0	0	0	0	0
1700031M16Rik	0	0	0	0	0	0				0	0	0	0	0	0	0	0
1700031P21Rik	0	0	0	0	0	0				0	0	0	0	0	0	0	0.0206422
1700034E13Rik	0	0	0	0	0	0				0	0	0	0	0	0	0	0
1700034F02Rik	0.622658	0.774928	0.728515	0.957492	0.65475	0.661623				0.48833	0.485388	0.460399	0.297612	0.39063	0.255821	0.445534	0.268348
1700034G24Rik	0	0	0	0	0	0				0	0	0	0	0	0	0	0
1700034H15Rik	4.57518	3.50563	2.83737	3.86827	4.14675	3.57276				2.40835	2.27366	2.17643	2.30649	2.76446	2.55821	2.94053	1.87844
1700034I23Rik	0	0	0	0	0	0				0.0221968	0	0	0.024801	0	0	0	0
1700034J05Rik	0	0	0	0	0	0				0	0	0	0	0	0	0	0
1700034K08Rik	0	0	0	0	0	0				0	0	0	0	0	0	0	0
1700034O15Rik	0	0	0	0	0	0				0.0110984	0.0255467	0	0	0	0.0255821	0	0
1700034P13Rik	0.108288	0.0738026	0	0.0382997	0.0623572	0.0661623				0.0443936	0.102187	0	0.024801	0.0300484	0.0767462	0.0594046	0.0206422
1700036G14Rik	0	0	0	0	0	0				0	0	0	0	0	0	0	0
1700037C18Rik	3.68181	4.35436	3.83429	5.32365	5.17565	4.53212				1.354	1.32843	1.46491	1.66166	1.38223	2.37913	1.84154	1.61009
1700037H04Rik	14.9709	15.0557	18.1745	21.3712	17.9589	16.4413				9.21167	9.06908	12.0959	10.2924	10.2465	11.6398	11.2275	11.6215
1700039E15Rik	0	0	0	0	0	0				0	0	0	0	0	0	0	0
1700039E22Rik	0	0	0	0	0	0				0	0	0	0	0	0	0	0
1700040L02Rik	0.108288	0.332112	0.345086	0.804293	0.467679	0.827029				0.0776888	0.127734	0.125563	0.198408	0.120194	0.12791	0.118809	0.185779
1700041C23Rik	0	0	0	0	0	0				0	0	0	0	0	0	0	0
1700041M19Rik	0	0	0	0	0	0				0	0	0	0	0	0	0	0
1700042B14Rik	0	0	0	0	0	0				0	0	0	0	0	0	0.0297023	0
1700042G07Rik	0	0	0	0	0	0				0	0.0255467	0	0.024801	0	0	0	0.0206422
1700042G15Rik	0	0	0	0	0	0				0	0.0255467	0	0	0	0	0.0297023	0
1700042O10Rik	0	0	0	0	0	0				0	0	0	0	0	0	0	0
1700044C05Rik	0	0	0	0	0	0				0	0	0	0	0	0	0	0
1700044K03Rik	0	0	0	0	0	0				0	0	0	0	0	0	0	0
1700045H11Rik	0	0	0	0	0	0				0	0	0	0	0	0	0	0
1700046C09Rik	0	0	0	0	0	0				0	0	0	0	0	0	0	0
1700047A11Rik	0	0	0	0	0	0.0330811				0.0110984	0	0	0	0	0.0255821	0	0
1700047E10Rik	0.243649	0.479717	0.153372	0.497896	0.21825	0.132325				0.244165	0.281014	0.167418	0.347213	0.180291	0.102328	0.148511	0.309632
1700047G03Rik	0	0	0	0	0	0				0	0	0	0	0	0	0	0
1700047I17Rik2	0	0	0	0	0	0				0	0	0	0	0	0	0	0
1700047L14Rik	0	0	0	0	0	0				0	0	0	0	0	0	0	0
1700047M11Rik	0	0	0	0	0	0				0	0	0	0	0	0	0	0
1700048M11Rik	0	0	0	0.153199	0.0311786	0				0	0	0	0	0	0	0	0
1700048O20Rik	0.974595	1.07014	0.996915	1.30219	0.810643	0.959353				2.92998	3.21889	1.75789	1.81047	1.9832	2.40471	4.03951	2.55963
1700049E15Rik	0	0	0	0	0	0				0	0	0	0	0	0	0	0
1700049E22Rik	0	0	0	0	0	0				0	0	0	0	0	0	0	0
1700049G17Rik	16.5411	12.1405	13.2666	10.4558	14.0927	14.1587				9.44474	10.8574	8.915	7.56429	9.19482	7.59787	11.1087	7.57567
1700049L16Rik	0	0	0	0	0	0				0	0	0	0	0	0	0	0
1700051A21Rik	0	0	0	0	0	0				0	0	0	0	0	0	0	0
1700052I22Rik	0	0	0	0	0	0				0	0	0	0	0	0	0	0
1700052K11Rik	5.65807	4.79717	6.63332	5.24705	4.67679	4.76369				4.55034	4.18966	4.14359	4.04256	4.29692	4.06755	4.24743	2.68348
1700052N19Rik	21.9555	19.9267	22.0472	19.9541	20.9208	15.5481				18.5232	19.2622	18.416	15.8478	17.4581	17.9842	18.0293	12.0344
1700054A03Rik	0	0	0	0	0	0				0.0110984	0.0255467	0	0	0	0	0	0
1700054K19Rik	0	0	0	0	0	0				0	0	0	0	0	0	0	0
1700054M17Rik	0	0	0	0	0	0				0	0	0	0	0	0	0	0
1700054O13Rik	0	0.0369013	0	0	0.0311786	0				0.0221968	0.0255467	0	0	0	0	0	0
1700055C04Rik	0	0	0	0	0	0				0	0	0	0	0	0	0	0
1700055N04Rik	0.108288	0	0.0766858	0.0382997	0	0.132325				0.0887872	0.0510934	0.0418545	0.198408	0.0901453	0.0511641	0.0594046	0.0412843
1700056E22Rik	0.351937	0.701125	0.575143	0.497896	0.280607	0.165406				0.144279	0.204374	0.0418545	0.124005	0.0901453	0.204656	0.0297023	0.165137
1700057G04Rik	0	0	0	0	0	0				0	0	0	0	0	0	0	0
1700057H15Rik	0	0	0	0	0	0				0	0	0	0	0	0	0	0
1700060C16Rik	0	0	0	0	0	0				0	0	0	0	0	0	0	0
1700060C20Rik	0	0	0	0	0	0				0	0	0	0	0	0	0	0
1700061F12Rik	0	0	0	0	0	0				0	0	0	0	0.0600968	0	0	0
1700061G19Rik	0.189505	0.369013	0.958572	0.306397	0.467679	0.264649				1.24302	1.2007	1.00451	1.19045	0.901453	1.10003	0.891069	0.722475
1700061I17Rik	3.79009	4.35436	3.60423	3.37037	3.55436	2.48109				0.887872	1.09851	1.13007	0.669626	1.53247	1.04886	0.504939	0.433485
1700063A18Rik	0	0	0	0	0	0				0	0	0	0	0	0	0	0
1700063D05Rik	1.32653	1.32845	0.728515	0.459596	1.27832	1.09168				1.83124	1.86491	1.13007	0.793631	2.49402	1.61167	0.861366	0.805044
1700063O14Rik	0	0	0	0	0	0				0	0	0	0	0	0	0	0
1700064J06Rik	0	0	0	0	0	0				0	0	0	0	0.0300484	0	0	0
1700064M15Rik	0	0	0	0	0	0				0	0.0255467	0	0	0	0.0255821	0	0
1700065D16Rik	0	0	0	0	0	0				0.0110984	0	0.0418545	0.0992039	0.120194	0.0255821	0	0.165137
1700065I16Rik	0	0	0	0	0	0				0	0	0	0	0	0	0	0
1700065J11Rik	0	0	0	0	0	0				0.0110984	0	0	0	0	0	0	0
1700065J18Rik	0	0	0	0	0	0				0	0	0	0	0	0	0	0
1700065L07Rik	0	0	0	0	0	0				0	0	0	0	0	0	0	0
1700065O20Rik	0	0	0	0	0	0				0	0	0	0	0	0	0	0
1700066B17Rik	0	0	0.0383429	0	0	0				0	0	0	0	0	0	0	0
1700066B19Rik	0.243649	0.0369013	0.191714	0.114899	0.0623572	0.132325				0.0887872	0.102187	0.0418545	0.0496019	0	0.0767462	0.0594046	0.0412843
1700066M21Rik	12.1554	12.1405	12.4998	9.65152	11.0372	9.42813				13.4069	12.4923	11.6355	9.15156	12.1095	9.61886	12.2076	8.21558
1700066N21Rik	0	0	0	0	0	0				0	0	0	0	0	0	0	0
1700066O22Rik	0	0	0	0	0	0				0	0	0	0	0	0	0	0
1700067G17Rik	0	0	0.0383429	0	0.0623572	0.0330811				0.0110984	0	0	0	0	0	0	0
1700067K01Rik	0.51437	0	0.920229	1.03409	4.17793	2.01795				0.155378	0.22992	0.167418	0.545621	0.480775	0.613969	0.237618	0.47477
1700067P10Rik	0.0541442	0	0	0	0.0311786	0				0.0110984	0	0	0	0	0	0	0
1700069L16Rik	0	0	0	0	0	0				0	0	0	0	0	0	0	0
1700069P05Rik	0	0	0	0	0	0				0	0	0	0	0	0	0	0
1700071K01Rik	0	0.0369013	0	0	0	0				0	0	0.0418545	0	0.0600968	0	0	0.0206422
1700071M16Rik	0	0	0	0	0	0				0	0	0	0	0	0	0	0
1700072B07Rik	0	0	0	0	0	0				0	0	0	0	0	0	0	0
1700072O05Rik	0	0	0	0	0	0				0	0	0	0	0	0	0	0
1700073E17Rik	0.0270721	0.0369013	0	0	0.0311786	0.0330811				0.055492	0.102187	0	0.124005	0.0300484	0.0511641	0	0.0825686
1700074H08Rik	0	0	0	0	0	0				0	0	0	0	0	0	0	0
1700074P13Rik	0	0	0	0	0	0				0	0	0	0	0	0	0	0
1700080E11Rik	0	0	0	0	0	0				0	0	0	0	0	0	0	0
1700080N15Rik	0	0	0	0	0	0				0	0	0	0	0	0	0	0
1700080O16Rik	0	0	0	0	0	0				0.0110984	0.0255467	0	0.0744029	0	0	0	0.0206422
1700081H04Rik	0	0	0	0	0	0				0.0110984	0	0	0	0	0	0	0
1700084C01Rik	0	0	0	0	0	0				0.0332952	0.0255467	0	0	0.0300484	0.0511641	0	0.0412843
1700084E18Rik	0.324865	0.332112	0.2684	0.421296	0.342965	0.727785				0.244165	0.178827	0.209272	0.223209	0.270436	0.179074	0.207916	0.185779
1700084F23Rik	0	0	0	0	0	0				0	0	0	0	0	0	0	0
1700084J12Rik	0	0	0	0.0382997	0	0				0.0110984	0.0255467	0	0	0	0	0	0
1700085C21Rik	0	0	0	0	0	0				0	0	0	0	0	0	0	0
1700086L19Rik	0	0	0	0	0	0				0	0	0	0.024801	0	0	0	0
1700086O06Rik	4.27739	3.83774	4.10269	4.05976	4.14675	4.00282				2.59703	3.01451	2.72054	1.93448	1.9231	2.17448	2.13856	1.63073
1700088E04Rik	2.49063	2.54619	3.14412	3.79167	2.71254	3.63893				0.332952	0.383201	0.795235	0.52082	0.57092	0.358149	0.297023	0.247706
1700091H14Rik	0	0	0	0	0	0				0	0	0	0	0	0	0	0.0206422
1700092C02Rik	0	0	0	0	0	0				0	0	0	0	0	0	0	0
1700092C10Rik	0	0	0	0	0	0				0	0	0	0	0	0	0	0
1700092E19Rik	0	0	0	0	0	0				0	0	0	0	0	0	0	0
1700092K14Rik	0.0812163	0	0	0	0	0				0	0.0255467	0	0	0	0.0255821	0	0.0206422
1700092M07Rik	0.622658	0.885632	0.460115	0.344697	0.966536	0.330811				0.377346	0.22992	0.502253	0.198408	0.510823	0.665134	0.38613	0.247706
1700093K21Rik	0.0270721	0.0738026	0.0383429	0	0	0.132325				0.0110984	0	0	0.024801	0	0	0.0297023	0.0412843
1700094D03Rik	13.7797	11.3656	12.8065	14.9369	16.0882	15.2504				12.8519	14.8426	11.5518	9.77158	13.1312	13.5841	11.5542	10.1353
1700094J05Rik	0	0	0	0	0.0935358	0				0.0221968	0.0255467	0.0837089	0.0496019	0	0.0255821	0.0297023	0
1700094M24Rik	0	0	0	0	0	0				0	0	0	0	0	0	0	0
1700095A21Rik	0	0	0	0	0	0				0	0	0	0	0	0	0	0
1700095B10Rik	0	0	0	0	0	0				0	0	0	0	0	0	0	0
1700096J18Rik	0	0	0	0	0	0				0	0	0	0	0	0	0	0
1700096K18Rik	1.3536	1.40225	1.30366	2.41288	1.80836	1.45557				2.30847	2.32475	1.00451	2.30649	1.9832	1.94424	2.88112	2.12614
1700097N02Rik	0.0812163	0.0369013	0.728515	0.842593	0.187072	0.198487				0.466133	0.510934	0.544108	0.372014	0.450726	0.460477	0.267321	0.165137
1700100L14Rik	0	0	0	0	0	0				0	0	0	0	0	0	0	0
1700101E01Rik	0.0270721	0.0369013	0.153372	0.153199	0.0623572	0				0.155378	0.127734	0.0837089	0.0744029	0.120194	0.0767462	0.0891069	0.103211
1700101I11Rik	0.0270721	0	0.153372	0	0.0311786	0.0330811				0.055492	0.0255467	0.0418545	0.198408	0.0300484	0.0511641	0.0297023	0.0412843
1700101O22Rik	0	0	0	0	0	0				0	0	0	0	0	0	0	0
1700102H20Rik	0.270721	0.221408	0.996915	0.382997	0.21825	0.132325				0.255263	0.281014	0.334836	0.148806	0.180291	0.255821	0.178214	0.206422
1700102P08Rik	1.21824	1.66056	0.996915	0.880892	1.59011	0.959353				1.28741	2.52913	1.50676	1.53766	1.68271	1.84191	0.950473	1.7133
1700104L18Rik	0	0	0	0	0	0				0	0	0	0	0	0	0	0
1700105P06Rik	0.162433	0.0738026	0	0.0382997	0.0935358	0.165406				0.0887872	0.0510934	0	0.0496019	0	0.0511641	0	0.0412843
1700106J16Rik	0	0	0	0	0	0				0.0110984	0	0	0	0	0	0	0
1700108F19Rik	0.0270721	0	0	0	0	0				0.133181	0.204374	0.125563	0.0744029	0.120194	0.153492	0.118809	0.0619265
1700108J01Rik	0	0	0	0	0	0				0	0	0	0	0	0	0	0
1700109G14Rik	0.13536	0	0	0.114899	0	0				0	0	0	0	0	0	0	0
1700109G15Rik	0	0	0	0	0	0				0	0	0	0	0	0	0	0
1700109H08Rik	2.68014	1.91887	3.29749	1.57029	1.62129	2.2826				2.46384	4.13857	1.96716	2.10808	2.31373	2.14889	3.26725	2.06422
1700109I08Rik	0	0	0	0	0	0				0	0	0	0	0	0	0	0
1700109K24Rik	0	0	0	0	0	0				0.0110984	0	0	0	0	0	0	0
1700110C19Rik	0.297793	0.479717	0.191714	0.0765993	0.498857	0.264649				0.21087	0.204374	0.0837089	0.297612	0.210339	0.179074	0.0891069	0.309632
1700110I01Rik	0	0	0	0	0	0				0	0	0	0	0	0	0	0
1700110K17Rik	0	0	0	0	0	0				0	0	0	0	0	0	0	0
1700111N16Rik	0	0	0	0	0	0				0.0110984	0	0	0.024801	0	0.0255821	0.0297023	0
1700112E06Rik	0	0.0369013	0.230057	0.153199	0.0935358	0.0330811				0.199771	0.0766402	0.251127	0.024801	0.360581	0.179074	0.118809	0.0825686
1700112H15Rik	0	0	0	0	0	0				0	0	0	0	0	0	0	0
1700112J05Rik	0	0	0	0	0	0				0	0	0	0	0	0	0	0
1700113A16Rik	5.44149	3.39492	5.32966	4.32786	6.36043	4.39979				3.04096	2.47803	2.46941	2.80251	2.88465	3.35125	2.49499	2.33256
1700113H08Rik	0	0	0	0	0	0				0	0	0	0	0	0	0	0
1700119H24Rik	0	0	0	0	0	0				0	0	0	0	0	0	0	0
1700120C14Rik	0.108288	0.110704	0	0.344697	0.0623572	0				0.055492	0.0766402	0	0.0496019	0.0300484	0.0511641	0.0297023	0.0412843
1700120E14Rik	0	0	0	0	0	0				0	0	0	0	0	0	0	0
1700120G07Rik	0	0	0	0	0	0				0	0	0	0	0	0	0	0
1700120K04Rik	0.0812163	0.110704	0.306743	0.344697	0.374143	0.198487				0.0443936	0.127734	0.0837089	0.124005	0.0300484	0.102328	0.0891069	0
1700121L16Rik	0	0.0738026	0	0	0	0				0	0.0255467	0	0	0	0	0	0
1700121N20Rik	0	0	0	0	0	0				0	0	0	0	0	0	0	0
1700122O11Rik	0	0.0738026	0	0	0	0				0	0.0255467	0	0.024801	0	0	0	0
1700123I01Rik	0.0541442	0.0738026	0.191714	0	0.0311786	0				0.0221968	0.0255467	0	0.0496019	0.0901453	0.12791	0.148511	0.0619265
1700123K08Rik	0	0	0	0	0	0				0	0	0	0	0	0	0	0.0206422
1700123L14Rik	0	0	0	0	0	0				0	0	0	0	0	0	0	0
1700123M08Rik	2.00334	1.40225	1.76377	1.64689	1.96425	2.11719				1.67586	1.27734	0.837089	0.892835	0.991598	1.40701	1.48511	1.09403
1700123O12Rik	0	0.0369013	0	0	0	0				0	0	0	0	0	0	0	0
1700123O20Rik	25.7726	31.5137	23.1208	26.2353	24.0699	25.8364				22.3078	20.4629	23.0618	23.5361	22.4161	22.5378	18.2669	26.1949
1700123O21Rik	0	0	0	0	0	0				0	0	0	0	0	0	0	0
1700124L16Rik	0.189505	0.147605	0.230057	0.0382997	0.0935358	0.396974				0.21087	0.281014	0.37669	0.173607	0.300484	0.281403	0.148511	0.103211
1700125G02Rik	0	0	0	0	0	0				0	0	0	0	0	0	0	0
1700125G22Rik	0	0	0	0.114899	0.0311786	0				0.0332952	0	0	0.0496019	0.0300484	0.0767462	0.0297023	0
1700125H03Rik	0.0270721	0	0	0	0	0				0.0776888	0.0766402	0.125563	0.024801	0.0300484	0.12791	0.118809	0
1700125H20Rik	0.0541442	0	0.153372	0.0382997	0.155893	0.0661623				0	0.0255467	0	0	0.0300484	0.0255821	0	0
1700126H18Rik	0	0	0	0	0	0				0	0	0	0	0	0	0	0
1700128A07Rik	0	0	0	0	0	0				0	0	0	0	0	0	0	0
1700128F08Rik	1.21824	0.590421	1.11194	0.0765993	0.685929	0.694704				0.62151	0.510934	0.502253	0.297612	0.57092	0.665134	0.38613	0.123853
1700129C05Rik	0	0	0	0	0	0				0	0	0	0	0	0	0	0
1810006J02Rik	0	0.258309	0	0	0	0				0	0.0255467	0	0	0	0	0	0
1810007C17Rik	0	0	0	0	0	0				0	0	0	0	0	0	0	0
1810007D17Rik	0	0	0	0	0	0				0	0	0	0	0	0	0	0
1810008I18Rik	0	0	0	0	0	0				0.0110984	0	0	0	0	0	0.0297023	0
1810009A15Rik	0.0541442	0.147605	0.2684	0.268098	0.4365	0.264649				0.0998856	0.0510934	0.167418	0.198408	0.210339	0.179074	0.0594046	0.0412843
1810009J06Rik	0	0	0	0	0	0				0	0	0	0	0	0	0	0
1810010D01Rik	0.189505	0.184507	0.421772	0.421296	0.155893	0.463136				0.110984	0.15328	0.209272	0.0744029	0.0901453	0	0.0594046	0.0412843
1810010H24Rik	2.78843	1.18084	1.95549	3.21717	2.49429	2.24952				0.665904	0.945229	0.418545	0.942437	0.901453	1.25352	1.00988	1.09403
1810011H11Rik	0	0	0	0	0	0				0	0	0	0	0	0	0	0
1810011O10Rik	14.5919	39.6689	13.6117	23.1713	9.54065	9.62661				121.161	155.35	186.838	98.6334	141.468	124.303	93.5325	110.725
1810012K16Rik	0.189505	0.295211	0	0.344697	0.311786	0.198487				0.144279	0.102187	0.209272	0.024801	0.0600968	0.0511641	0	0.0825686
1810013A23Rik	0.0541442	0.0738026	0.191714	0	0	0.0992434				0.0998856	0	0	0.024801	0.0600968	0.0255821	0.0297023	0.0825686
1810013L24Rik	59.7481	59.1897	75.8039	56.2239	57.5869	65.5999				78.2881	104.256	101.748	89.0851	93.2102	89.9977	99.7997	128.931
1810014B01Rik	5.11663	3.91154	5.52138	4.55766	5.61215	5.42531				2.7968	3.06561	2.09272	2.77771	2.16349	3.17218	3.08904	2.6422
1810018F18Rik	0	0	0	0	0	0				0	0	0	0	0	0	0	0
1810019D21Rik	11.4786	10.8859	7.55355	8.84722	13.438	8.03872				16.9362	13.3609	12.3471	12.4005	18.9606	22.3587	15.1779	12.3853
1810020O05Rik	0.0270721	0	0	0	0	0				0	0	0	0	0	0.0255821	0	0.0206422
1810021B22Rik	1.40775	1.88197	3.18246	2.68098	1.71482	1.98487				0.721396	0.868588	0.585962	0.644825	0.841356	0.86979	0.831664	0.846328
1810022K09Rik	35.6269	41.9568	32.1313	37.955	32.6752	27.1927				38.1674	32.3421	39.5525	20.8824	28.516	40.5732	36.2071	21.2821
1810024B03Rik	0.0270721	0.110704	0	0	0.0311786	0.0661623				0.0332952	0.0510934	0	0	0.0901453	0.0511641	0	0.0412843
1810026B05Rik	58.8818	53.7283	58.0895	48.947	58.0545	55.444				51.8184	50.0205	55.8757	29.7364	50.8119	53.8758	65.6421	31.4999
1810026J23Rik	53.1425	45.3517	47.3151	44.6574	43.2447	47.7692				52.2069	53.9547	43.5705	47.097	52.6448	50.8827	45.4148	49.376
1810030O07Rik	63.6194	63.5441	61.8854	61.5859	61.6401	60.6047				68.9655	72.706	61.819	65.5737	63.4322	66.8971	65.4341	58.4586
1810032O08Rik	23.7693	24.8715	26.1882	20.4137	24.1634	20.8411				16.6698	15.7623	17.4952	14.0373	20.1925	24.2518	18.5045	16.3073
1810034E14Rik	0.108288	0.479717	0.230057	0.421296	0.280607	0.0992434				1.16533	1.22624	1.29749	1.36405	1.44232	1.38143	1.2772	1.3211
1810037I17Rik	37.4136	46.385	40.8352	52.7003	41.8728	39.0688				65.9356	61.542	84.0437	47.221	84.8267	107.112	70.7806	77.8209
1810041L15Rik	0	0	0	0	0	0				0	0	0	0	0.0300484	0.0255821	0	0.0412843
1810043G02Rik	22.9301	21.698	24.5011	18.6902	16.8988	24.7778				4.1841	5.4159	4.18545	5.82823	4.44717	4.65594	4.69296	4.87155
1810043H04Rik	6.63266	9.07772	9.50904	9.26852	7.45168	6.98012				2.0754	2.93787	3.7669	4.04256	3.33538	3.7094	3.53457	3.90137
1810044D09Rik	1.27239	1.43915	1.342	1.68519	1.62129	1.5879				1.29851	0.715308	0.962652	0.942437	0.841356	1.17677	0.950473	0.784402
1810046K07Rik	0	0	0	0	0	0				0	0	0	0	0	0	0	0
1810053B23Rik	0	0	0	0	0.0623572	0				0.0221968	0	0	0.0496019	0	0	0	0
1810055G02Rik	18.5715	19.1518	16.6025	19.2264	15.9011	16.706				10.7211	10.3464	13.8538	13.0453	15.5651	12.9189	12.3264	18.0206
1810058I24Rik	73.8256	76.6071	85.0829	96.4769	79.5054	93.752				93.9923	81.8772	86.2202	96.5998	81.6115	104.298	95.0473	93.1787
1810062G17Rik	1.73261	1.07014	1.38034	1.45539	0.904179	1.62098				1.49828	0.791948	1.00451	1.83527	1.17189	1.20236	0.801962	1.19724
1810062O18Rik	0.64973	0.369013	0.690172	1.26389	1.12243	1.19092				0.288558	0.383201	0.334836	0.620024	0.450726	0.409313	0.77226	0.47477
1810064F22Rik	0.324865	0.295211	0.153372	0.0765993	0.405322	0.0661623				0.21087	0.15328	0.125563	0.24801	0.150242	0.12791	0.237618	0.123853
1810065E05Rik	0	0	0	0	0	0				0	0	0	0	0	0	0	0
2010001E11Rik	0.812163	0.516618	0.920229	0.421296	0.530036	0.231568				0.310755	0.332107	0.0418545	0.173607	0.120194	0.306985	0.0594046	0.185779
2010002M12Rik	0.595586	0.664224	0.690172	0.497896	0.685929	0.330811				0.199771	0.178827	0.0418545	0.0744029	0.540872	0.12791	0.0297023	0.0619265
2010003K11Rik	0	0	0	0	0	0.0330811				0.0110984	0	0.0418545	0.024801	0	0.0511641	0.0594046	0.0412843
2010005H15Rik	0.0541442	0.147605	0	0.306397	0.0623572	0.231568				0.0998856	0.15328	0.669671	0.322413	0.0600968	0.204656	0.297023	0.144495
2010009K17Rik	0	0	0	0	0	0				0	0	0	0	0	0	0	0
2010010A06Rik	0.0812163	0.147605	0	0	0	0.0330811				0	0	0	0	0	0	0	0
2010012O05Rik	14.8897	12.8786	11.7713	11.2984	13.1574	11.1814				17.0915	16.0178	14.9839	12.5989	12.2898	13.7887	15.4749	10.4243
2010015L04Rik	4.1691	2.65689	3.18246	3.48527	5.01975	3.63893				3.4849	5.16044	3.18094	3.10012	3.48562	3.428	3.11874	2.53899
2010016I18Rik	0.297793	0.442816	0.230057	0.612795	0.249429	0.198487				5.72677	5.13489	2.21829	3.12492	3.24523	3.83731	2.79202	1.83715
2010106C02Rik	0	0	0	0	0	0				0	0	0	0	0	0	0	0
2010106E10Rik	0	0	0	0	0	0				0	0	0	0	0	0	0	0
2010107E04Rik	53.1967	63.1013	43.4042	47.4533	49.6363	42.7408				49.2991	41.3857	49.5975	34.9694	39.7541	55.9736	31.0389	28.2798
2010107G12Rik	0.351937	0.738026	1.45703	0.689394	0.561215	1.35633				1.12094	0.766402	0.75338	1.21525	0.751211	0.946536	1.00988	1.23853
2010107G23Rik	10.883	9.44674	10.7744	13.7879	14.6851	12.5378				20.2102	18.2659	19.3786	16.0958	21.3344	25.0448	24.5341	21.4885
2010109A12Rik	0.0812163	0.258309	0	0.306397	0.187072	0.165406				0.0998856	0.178827	0.0837089	0.024801	0.0300484	0.12791	0.0594046	0.0619265
2010109I03Rik	0.379009	0.811829	0.651829	0.306397	0.467679	0.264649				0.455034	0.459841	0.711526	0.545621	0.360581	0.230239	0.504939	0.123853
2010111I01Rik	648.918	465.584	731.544	660.363	625.068	696.557				276.428	248.825	225.512	226.21	223.5	262.063	225.381	192.798
2010204K13Rik	0.406081	0.479717	1.18863	0.382997	0.21825	0.926272				0.166476	0.178827	0.167418	0.198408	0.150242	0.204656	0.38613	0.247706
2010300C02Rik	49.4336	40.3331	55.7506	40.1381	28.0607	44.1303				39.5547	38.2434	34.4881	44.9889	35.0064	37.2731	37.514	43.9059
2010308F09Rik	0.0270721	0.147605	0	0.114899	0.0623572	0.0330811				0.0443936	0	0	0.0496019	0.0300484	0.0511641	0	0.0619265
2010310C07Rik	0.13536	0.147605	0.115029	0.268098	0.21825	0.198487				0.199771	0.178827	0.167418	0.148806	0.0600968	0.102328	0.148511	0.185779
2010315B03Rik	23.7964	18.0816	25.9965	25.2395	24.6623	24.6124				21.6308	23.6563	19.8809	14.335	14.9942	17.0632	26.94	12.1995
2010320M18Rik	11.4515	10.3693	10.9661	9.00042	7.45168	9.42813				6.55915	5.44145	6.32002	6.12584	5.82939	8.87698	5.85135	5.86237
2200002D01Rik	0.595586	1.95577	1.53372	0.919192	0.779465	0.760866				1.65366	1.27734	2.55312	2.30649	1.23199	2.02098	1.72273	1.89908
2200002J24Rik	0	0	0	0	0	0				0	0	0	0	0	0	0	0
2210010C04Rik	0	0	0	0	0	0				0	0	0	0	0	0.0255821	0	0
2210011C24Rik	0.0541442	0.110704	0.0383429	0.765993	0.0935358	0.0661623				0.110984	0.15328	0.37669	0.0744029	0	0.230239	0.445534	0.247706
2210013O21Rik	29.5086	27.8974	30.866	28.495	28.1854	26.895				18.4233	18.7513	17.3696	16.071	16.8872	21.0029	18.059	15.2133
2210015D19Rik	4.00667	5.79351	6.36492	4.55766	4.92622	4.46596				5.18295	4.08747	5.90148	3.84415	4.7176	5.39782	4.03951	3.50917
2210016F16Rik	25.908	27.8605	21.5104	23.9373	23.0722	19.7494				26.8359	22.9665	29.0051	25.669	24.6998	25.6588	26.1083	22.6651
2210016L21Rik	25.8809	26.3475	26.4183	23.2096	26.1277	24.3146				14.9939	14.3062	16.2395	13.8885	13.672	17.1911	14.3462	13.4793
2210018M11Rik	49.7044	48.5621	45.3213	47.3767	56.9009	55.014				47.4124	52.9073	45.8725	41.988	47.2662	40.6499	38.7615	48.3026
2210019I11Rik	0	0	0	0	0	0				0	0	0	0	0	0	0	0
2210039B01Rik	7.79676	1.99267	2.684	2.71928	3.18022	3.17579				3.496	3.98529	1.50676	1.28965	2.13344	3.76056	2.73261	2.02293
2210404O09Rik	9.71888	8.04449	11.0428	8.19613	10.476	9.22964				10.3659	9.93767	9.04056	6.82026	8.32341	8.21184	10.871	6.72934
2210407C18Rik	0.0812163	0.147605	0	0	0	0				0	0	0	0	0	0	0	0
2210408F21Rik	2.8155	1.88197	2.56897	2.41288	2.46311	2.61341				0.266362	0.332107	0.125563	0.173607	0.270436	0.332567	0.326725	0.247706
2210408I21Rik	9.06915	9.04082	10.7744	7.69823	7.51404	8.46877				6.11522	5.69692	5.39922	5.33221	3.9063	4.63035	7.15825	4.95412
2210409D07Rik	0	0	0	0	0	0				0.543822	0.332107	0.167418	0.24801	0.210339	0.409313	0.504939	0.165137
2210409E12Rik	0	0.0738026	0	0	0	0				0.355149	0.15328	0.502253	0.0496019	0	0.179074	0.0594046	0.0412843
2210414B05Rik	0	0	0	0	0	0				0	0	0	0	0	0	0	0
2210416O15Rik	0.108288	0.184507	0	0.191498	0.0311786	0.0661623				0.0221968	0.0255467	0	0.0496019	0.0600968	0.0511641	0	0
2210417A02Rik	0	0	0	0	0	0				0	0	0	0	0	0	0	0
2210420H20Rik	0.0812163	0	0	0	0	0.0330811				0	0.0255467	0	0.0496019	0.0300484	0.0255821	0	0.0619265
2300002M23Rik	0	0	0	0	0.0311786	0.0661623				0	0	0	0	0.0300484	0	0	0
2300003K06Rik	0	0	0	0	0	0				0	0	0	0	0	0	0	0
2300005B03Rik	0.243649	0	0.958572	0.229798	0.0935358	0				1.15423	0.689761	1.17192	1.78567	0.901453	0.716298	0.77226	1.50688
2300009A05Rik	3.16744	2.7307	1.80212	2.68098	2.46311	2.94422				2.0865	2.09483	1.8416	2.35609	2.28368	2.73728	1.81184	1.79587
2310001H17Rik	5.90172	3.69013	3.87263	3.82997	6.17336	6.3185				7.97975	5.67137	5.48293	3.91855	4.59741	6.65134	4.63356	3.73623
2310001K24Rik	0.0541442	0	0	0	0	0				0.0221968	0	0.0837089	0.0496019	0.0300484	0	0.0891069	0.0206422
2310002D06Rik	0	0	0	0	0	0				0.0110984	0.0510934	0	0	0	0	0	0.0206422
2310002F09Rik	0.216577	0.147605	0.766858	0.459596	0.748286	0.363893				3.06316	3.34662	1.71603	2.23209	1.47237	1.53492	2.67321	3.24082
2310002J15Rik	3.005	2.39859	4.33275	4.71086	4.67679	4.36671				11.8531	9.04354	12.933	9.32516	11.5987	11.8701	9.50473	10.5275
2310002L09Rik	0	0	0	0	0	0				0	0	0	0	0	0	0	0
2310003H01Rik	25.6914	33.1374	33.0516	39.7168	28.1854	31.2948				20.532	19.1345	21.0946	22.9657	21.6649	23.2029	23.6727	27.4128
2310005A03Rik	0.0270721	0.0369013	0	0	0	0				0.0110984	0	0	0.024801	0.0300484	0	0.0594046	0.0412843
2310005E17Rik	0.0270721	0	0.0383429	0	0.0623572	0.0330811				0.610412	0.715308	0.37669	0.272811	0.210339	0.153492	0.148511	0.0619265
2310005G13Rik	0.0812163	0	0	0.0382997	0.0311786	0				0.0776888	0.306561	0.125563	0.0744029	0.0901453	0.12791	0.0594046	0.123853
2310007B03Rik	2.86964	2.50929	5.44469	9.07702	2.24486	2.11719				48.9994	49.4329	43.5286	90.5731	44.7722	58.8899	57.0878	76.2521
2310007L24Rik	0	0.0738026	0	0.229798	0.155893	0.0330811				0	0	0	0.024801	0	0.0255821	0	0
2310008N11Rik	0.189505	0.590421	0.498458	0.536195	0.21825	0.198487				0.332952	0.255467	0.209272	0.223209	0.300484	0.306985	0.178214	0.103211
2310009A05Rik	6.17244	6.53153	4.67783	7.23864	4.83268	4.76369				4.78341	5.00716	5.48293	3.52174	4.8378	5.67922	5.49492	3.65366
2310009B15Rik	4.73762	4.35436	5.368	4.71086	4.67679	3.93666				2.24188	2.2992	3.55763	2.23209	3.00484	4.4257	2.88112	2.66284
2310010J17Rik	2.38234	1.77126	2.4156	1.37879	1.49657	1.5879				0.588215	0.817495	0.711526	0.917636	0.721162	0.920954	0.950473	0.454127
2310011J03Rik	34.4357	35.2039	37.9978	38.1848	34.5147	37.911				22.9737	19.39	24.2337	25.1978	24.9402	28.2426	26.2568	26.9793
2310014L17Rik	13.3465	12.5095	12.7682	11.4899	12.4714	14.1257				7.75778	6.82097	8.53831	7.14268	11.9593	9.33745	8.64337	10.1766
2310015A10Rik	35.6269	19.1149	24.8845	25.6991	30.6797	29.6076				11.0318	10.5508	7.74307	11.582	10.6672	11.3073	11.4354	8.87613
2310015B20Rik	0.0812163	0.0369013	0.115029	0.114899	0.311786	0.0661623				0.244165	0.178827	0.251127	0.347213	0.180291	0.332567	0.148511	0.165137
2310015D24Rik	0.0270721	0	0	0.0382997	0	0				0.177574	0.22992	0.0837089	0.297612	0.270436	0.358149	0.178214	0.392201
2310016D03Rik	0	0	0	0	0	0				0	0	0	0	0	0	0	0
2310020H05Rik	0	0	0	0	0	0				0	0	0	0	0	0	0	0
2310022A10Rik	20.2499	21.6611	22.929	22.0606	18.4577	20.9404				23.4509	19.5943	23.1455	23.5857	24.6397	23.1262	21.653	23.9036
2310022B05Rik	38.0092	36.4954	40.4517	38.8742	36.2919	38.1756				47.0683	43.3272	51.2717	42.3848	57.3925	58.455	50.88	52.1421
2310030A07Rik	0	0	0	0	0	0				0	0	0.0418545	0	0.0300484	0	0	0.0206422
2310030G06Rik	20.6019	21.698	20.7052	21.1414	27.5307	27.0273				10.9985	12.2113	11.0914	10.5652	10.9076	9.56769	9.83146	10.672
2310033P09Rik	14.7543	13.8011	15.2605	17.9242	14.1551	11.6776				9.79989	9.37565	9.62652	9.25076	11.148	11.1794	10.5443	9.97016
2310034C09Rik	0	0	0	0	0	0				0	0	0	0	0	0	0	0
2310034G01Rik	0.64973	0.738026	1.95549	0.651094	0.685929	0.628542				0.221968	0.15328	0.251127	0.198408	0.270436	0.230239	0.267321	0.103211
2310034O05Rik	0.0270721	0	0	0	0	0.0661623				0	0	0	0	0	0	0	0
2310035C23Rik	91.639	79.5223	104.178	96.3237	97.1837	97.2255				127.621	134.708	100.827	120.334	104.839	112.663	126.591	100.218
2310036O22Rik	60.6144	59.4111	62.9974	62.3136	60.1123	53.5915				33.273	40.9514	30.5956	32.5389	38.5822	46.8919	34.0685	32.6765
2310039H08Rik	4.38568	6.38393	6.47995	8.08123	5.3939	5.68996				3.59588	4.82833	4.85512	4.96019	4.35702	5.78155	3.62368	5.26375
2310039L15Rik	10.3415	10.2217	11.3112	11.6431	9.63419	10.1228				9.43364	13.5398	10.7566	8.33312	8.59385	9.20954	11.2869	6.52292
2310040G24Rik	0.541442	0.55352	0	0.536195	0.4365	0.29773				0.144279	0.0766402	0.0837089	0.0992039	0.180291	0.179074	0.356427	0.28899
2310042E22Rik	2.43649	2.28788	3.64257	2.68098	1.90189	0.793948				23.684	11.8281	19.253	14.335	14.0627	20.568	17.2867	9.43346
2310043L19Rik	0	0.0738026	0	0	0	0.0330811				0.0221968	0.0255467	0	0.0496019	0	0.0255821	0	0
2310043O21Rik	0	0	0	0	0	0				0	0	0	0	0	0	0	0
2310045N01Rik	27.8301	28.9306	24.6928	26.7332	28.4972	26.4649				20.077	16.5543	19.5042	16.9639	18.7803	22.6913	20.4946	22.9541
2310047M10Rik	10.5852	12.3988	15.1838	16.0859	12.5338	15.6474				6.19291	6.97425	9.04056	9.10195	8.59385	9.18396	9.1186	13.3348
2310050C09Rik	2.78843	0.332112	2.684	1.95328	1.71482	0.56238				1.16533	1.916	1.29749	2.87691	2.82455	2.02098	1.2475	2.39449
2310057J18Rik	0	0	0	0	0	0				0	0	0	0	0	0	0	0
2310057M21Rik	10.1791	12.0667	10.2376	9.72812	9.35358	9.79202				9.89977	11.6493	10.5892	8.68034	11.3884	10.2584	10.7522	9.78438
2310057N15Rik	0	0	0	0	0	0				0	0	0	0	0	0	0	0
2310061I04Rik	16.3245	16.6794	19.6699	19.1498	16.5247	13.7287				13.9618	14.2295	15.0676	14.3102	15.535	16.3214	12.6235	14.6559
2310061J03Rik	1.51604	1.80816	1.18863	1.72348	1.65247	1.78638				0.865675	1.1496	1.00451	1.14084	1.17189	1.07445	0.534641	1.3211
2310061N02Rik	0	0	0	0	0	0				0	0	0	0	0	0	0	0
2310065F04Rik	0	0	0	0	0	0				0	0	0	0	0	0	0	0
2310067B10Rik	64.6482	61.4776	75.1137	69.4373	65.288	72.58				91.1179	88.0851	83.2067	115.672	101.383	96.5211	96.7998	113.635
2310068J16Rik	0.13536	0.110704	0.345086	0.153199	0.187072	0.132325				0.110984	0.204374	0.292981	0.124005	0.120194	0.204656	0.148511	0.28899
2310069B03Rik	0.297793	0.405914	0.728515	0.268098	0.405322	0.463136				0.0998856	0.0255467	0.0418545	0.024801	0.0600968	0.0511641	0	0.0825686
2310069G16Rik	0	0	0	0	0	0				0.0332952	0.0255467	0	0.0496019	0	0.0255821	0.148511	0
2310079G19Rik	0	0.0369013	0	0	0	0				0	0	0	0	0	0	0	0
2310081J21Rik	0	0	0	0	0	0				0	0	0	0	0	0	0	0
2410002F23Rik	94.4545	80.1128	125.65	84.4125	82.8727	85.5809				87.3555	89.0303	80.235	111.753	94.0516	107.419	93.5919	104.614
2410003L11Rik	0	0	0	0	0	0				0.0332952	0.0255467	0.0418545	0	0.0300484	0	0	0
2410004B18Rik	16.8118	16.3473	16.1424	12.6772	16.93	15.1512				13.5733	15.9667	17.2859	14.707	15.505	15.6051	14.5244	16.0802
2410004I01Rik	0.0270721	0	0.0766858	0.0382997	0.0935358	0.0992434				0	0	0	0	0	0.0255821	0	0
2410004N09Rik	8.52771	9.81575	12.4231	9.84301	9.79008	10.619				6.85881	7.84284	6.65486	6.79546	7.45201	11.4096	7.06914	7.32797
2410004P03Rik	0.0541442	0.55352	0.191714	0.114899	0.280607	0.363893				0.0665904	0.0255467	0.0837089	0.0496019	0.120194	0.0767462	0.0594046	0.227064
2410006H16Rik	39.9855	48.968	56.5558	59.7092	53.9078	55.5102				37.0021	40.7981	48.0071	45.8818	49.4597	56.2805	51.0879	62.5457
2410007B07Rik	0.0812163	0.184507	0.0766858	0	0	0				0	0	0	0	0	0.0511641	0.0297023	0
2410012E07Rik	0.0812163	0	0	0	0.0311786	0				0	0	0	0	0	0	0	0.0206422
2410012M07Rik	0	0	0	0	0	0				0	0	0	0	0	0	0	0
2410015M20Rik	43.8027	51.8833	53.7184	51.8194	47.1109	41.2853				47.0905	36.4296	49.6394	44.8897	46.0342	57.5596	38.3754	44.36
2410016O06Rik	9.39402	9.18843	10.5826	7.92803	8.76118	7.93948				9.40034	8.04722	9.71023	9.49877	10.7273	8.4165	9.35622	10.5275
2410017I17Rik	0	0	0.0766858	0	0	0.0661623				0.0221968	0.0766402	0.0418545	0.0496019	0.0300484	0.0511641	0	0.0206422
2410018L13Rik	3.62766	2.43549	2.91406	3.48527	4.9574	3.3412				1.86453	1.66054	1.50676	1.81047	1.68271	2.48146	2.49499	2.20871
2410021H03Rik	0	0	0	0	0	0				0.0998856	0.15328	0	0.024801	0.0901453	0	0.118809	0.0412843
2410076I21Rik	0.189505	0.922533	0.0766858	0.382997	0.498857	0.132325				0.166476	0.383201	0.460399	0.124005	0.39063	0.255821	0.356427	0.247706
2410088K16Rik	0.0812163	0	0.115029	0	0.0935358	0.132325				0.0332952	0	0	0.024801	0	0.0255821	0	0.0412843
2410089E03Rik	98.5966	73.3967	96.0106	89.7361	91.4156	104.702				49.7874	60.7501	41.8126	54.5621	49.64	45.1012	50.3157	50.0572
2410114N07Rik	0.243649	0	0.115029	0.344697	0.124714	0.0330811				0.110984	0.204374	0.0418545	0.124005	0.0901453	0.204656	0.0891069	0.0825686
2410124H12Rik	0.0270721	0	0	0.0382997	0.0311786	0.0330811				0.0998856	0.204374	0.125563	0.223209	0.150242	0.102328	0.148511	0.247706
2410127L17Rik	31.1329	29.2627	32.5531	35.1974	30.1185	27.2589				56.6906	52.9583	52.1506	42.9801	38.2516	38.0149	55.4245	36.516
2410131K14Rik	12.5615	14.9819	15.0304	12.7921	13.3756	15.8128				10.7211	10.2953	10.2962	12.4005	11.8992	11.0003	9.80176	14.016
2410137M14Rik	0	0	0	0.114899	0	0				0	0	0.0418545	0.024801	0	0	0	0
2410141K09Rik	0.893379	0.332112	0.498458	0.229798	0.65475	0.496217				0.34405	0.562028	0.37669	0.272811	0.300484	0.332567	0.504939	0.268348
2500004C02Rik	6.01001	5.83041	3.83429	5.17045	6.42279	4.43287				4.07311	4.11302	3.64134	3.42253	3.99644	4.19546	3.65338	2.91054
2510002D24Rik	26.1246	26.7535	33.7034	38.4912	33.3923	32.2872				26.4031	29.4554	26.6613	23.1145	26.8933	30.4938	32.227	25.8233
2510003E04Rik	38.1446	34.4289	27.8369	32.4398	37.9755	37.5802				24.8049	25.4956	25.6568	19.3944	25.2707	23.2285	22.1282	19.8371
2510009E07Rik	47.3491	39.4844	45.4363	45.9596	47.9527	48.0338				27.2244	22.9665	20.5924	14.9798	22.326	21.054	28.1578	20.3325
2510039O18Rik	47.9988	48.9311	45.1296	42.5126	49.1998	46.1813				46.4579	45.7797	50.0161	48.1139	52.2843	50.9083	41.8505	53.2774
2510049J12Rik	0.13536	0.184507	0.306743	0.191498	0.0623572	0.330811				0.188673	0.127734	0.334836	0.198408	0.150242	0.306985	0.207916	0.123853
2610001J05Rik	49.5149	51.4035	48.0053	43.7382	44.2424	39.2342				58.7438	48.0534	54.2852	43.3521	45.7638	48.8617	49.6028	33.8531
2610002J02Rik	37.3866	36.7906	36.8859	36.7294	34.7953	36.8193				22.2745	19.9775	20.8854	22.4945	25.6914	23.4332	20.257	21.7155
2610002M06Rik	28.0738	24.7977	25.8431	25.7374	27.0318	28.516				17.6465	18.2915	14.3142	15.1534	16.5567	14.7864	20.0787	15.1513
2610005L07Rik	85.3854	70.9981	79.1397	70.8927	97.4019	88.2605				77.6777	73.2424	53.3226	53.0741	63.8529	68.7134	60.563	46.5481
2610008E11Rik	49.9209	38.7833	45.4747	44.2361	45.0531	47.8353				37.8344	36.3274	29.5492	29.91	29.3573	28.4728	43.6921	24.6467
2610015P09Rik	32.7843	28.9675	32.208	34.891	41.5299	32.7173				24.3055	26.262	22.7688	19.0967	23.3176	22.9471	24.9202	16.4105
2610016A17Rik	0	0	0	0	0.187072	0.0330811				0	0	0	0	0	0	0	0.0206422
2610018G03Rik	50.4353	42.4734	29.0256	34.2782	37.4455	34.6029				19.1114	20.5907	22.5177	20.0888	18.7502	20.5936	23.9994	21.7981
2610020C07Rik	1.57018	1.32845	1.80212	3.37037	2.02661	1.12476				0.821282	0.408747	0.669671	0.52082	0.480775	0.588387	0.415832	0.371559
2610020H08Rik	8.85258	10.7383	15.6056	16.3923	15.6828	9.72586				12.5745	12.5179	8.99871	9.02755	12.9809	10.8724	11.6433	6.44035
2610027K06Rik	0	0	0	0	0.0311786	0.0992434				0	0	0	0	0	0	0	0
2610028E06Rik	0.0270721	0	0	0.0765993	0.0623572	0				0.0110984	0.0510934	0	0	0	0	0	0
2610028H24Rik	0.270721	0.184507	0.460115	0.191498	0.187072	0.264649				0.266362	0.15328	0.251127	0.0992039	0.150242	0.281403	0.178214	0.144495
2610034B18Rik	21.0079	26.5689	29.1023	32.8228	29.1208	27.7551				41.0197	35.791	37.376	35.2174	33.7444	33.8707	33.3557	34.844
2610034M16Rik	0.0541442	0	0	0.191498	0	0				0	0	0	0	0	0	0	0
2610035D17Rik	8.55478	10.5538	8.70384	12.3325	6.36043	9.8251				23.2511	18.8279	21.0109	18.7495	26.3224	21.7448	20.4352	19.5688
2610035F20Rik	0	0	0	0	0	0				0	0	0	0	0	0	0	0
2610037D02Rik	1.24532	0.701125	0.613486	0.459596	0.873001	0.793948				0.455034	0.510934	0.585962	0.570422	0.661065	0.639552	0.801962	0.454127
2610044O15Rik8	24.2566	15.3878	21.587	19.303	19.0501	19.584				17.5022	15.9922	14.105	12.3013	12.9809	14.4539	16.4254	10.8991
2610100L16Rik	0	0	0	0	0	0				0	0	0	0	0	0	0	0
2610203C20Rik	95.8894	39.3737	84.8912	55.2664	80.4408	55.8741				39.8655	29.251	23.4803	17.5095	14.9341	20.5936	25.3955	9.63989
2610203C22Rik	0.351937	0.184507	0.191714	0.421296	0.0623572	0.165406				0.887872	0.638668	0.502253	0.396815	0.631017	0.511641	0.534641	0.350917
2610206C17Rik	0.541442	0.0738026	0.383429	0.382997	0.498857	0.330811				0.144279	0.0510934	0.0418545	0	0.0300484	0.0767462	0.0297023	0.0619265
2610207O16Rik	0	0	0	0	0	0				0	0	0	0	0	0	0	0
2610301B20Rik	11.7222	10.2955	13.3817	11.9878	15.5269	16.9045				7.29165	9.60557	5.1481	6.17544	5.85944	5.90946	8.04932	6.27522
2610305D13Rik	17.4344	13.0262	0.421772	0.229798	17.0547	16.5075				15.9706	17.4995	13.6864	0.0744029	10.8174	11.3073	0.267321	13.7477
2610306M01Rik	4.30446	3.50563	2.10886	4.71086	4.14675	4.16822				2.27517	1.37952	1.59047	2.08328	1.80291	2.40471	2.07916	1.69266
2610307P16Rik	4.06081	6.12562	3.02909	2.68098	3.33611	2.01795				0.776888	1.09851	1.8416	0.595223	1.23199	1.40701	1.2772	0.805044
2610316D01Rik	0	0	0	0	0	0				0	0.0255467	0	0	0	0	0	0
2610318N02Rik	0	0	0.0383429	0.0382997	0.0311786	0.0661623				0.055492	0.0255467	0	0.0496019	0	0	0	0.0412843
2610507B11Rik	259.324	254.102	273.807	253.122	255.602	242.783				358.667	332.848	310.937	348.007	335.1	308.596	322.953	311.242
2610507I01Rik	40.1208	30.296	39.8383	33.6654	43.7436	40.1936				30.6427	33.6961	21.6806	27.1323	29.7479	32.9497	29.0488	26.4839
2610524H06Rik	15.2145	13.4321	16.104	15.1284	12.2844	14.1587				5.76007	5.44145	4.64584	6.24984	4.56736	5.09083	5.1385	5.7798
2610528A11Rik	0.324865	0.701125	0.421772	0.880892	0.405322	0.0330811				12.0529	5.16044	25.7405	10.466	8.6239	8.26301	5.1682	4.93348
2610528J11Rik	4.73762	4.76027	3.4892	4.09806	4.9574	4.82985				10.6767	10.1676	10.5473	9.42437	11.5686	12.1771	10.4552	10.4243
2700029M09Rik	38.8485	43.2852	48.5804	53.8493	37.4455	33.0481				30.3097	30.605	35.4926	24.677	27.8849	30.2124	37.6625	19.9816
2700038G22Rik	4.60226	4.76027	3.41252	3.33207	4.48972	3.3412				3.86224	4.16412	5.52479	2.43049	4.35702	5.39782	2.85142	4.35549
2700046A07Rik	0.162433	0.369013	0.306743	0.804293	0.685929	0.363893				0.188673	0.281014	0.125563	0.372014	0.360581	0.179074	0.237618	0.392201
2700046G09Rik	2.08455	2.39859	3.33583	2.48948	2.65018	1.65406				0.921167	0.868588	0.418545	0.868034	0.96155	0.9977	0.683153	0.784402
2700049A03Rik	25.3936	26.9011	28.7188	30.2184	29.3702	29.0452				28.0457	31.7035	23.2292	25.2722	25.3308	22.8959	27.0885	22.3555
2700054A10Rik	0.812163	1.25464	0.383429	1.18729	1.09125	0.926272				1.02105	0.868588	1.08822	0.992039	0.931501	0.920954	1.42571	1.19724
2700060E02Rik	115.138	128.786	119.591	140.138	120.069	126.668				127.254	127.274	149.42	113.34	113.253	133.922	137.106	115.225
2700062C07Rik	14.9167	13.6535	16.1807	15.9327	16.6182	13.5964				13.0184	10.3975	10.9659	10.1188	11.3884	12.305	12.0591	8.50457
2700069I18Rik	0.0541442	0.0738026	0.2684	0	0	0.0330811				0.055492	0.0510934	0	0.124005	0.0600968	0.0255821	0.0891069	0.0206422
2700070H01Rik	0.622658	0.405914	0.421772	0.612795	0.342965	0.330811				0.48833	0.485388	0.460399	0.421616	0.39063	0.588387	0.297023	0.350917
2700081O15Rik	36.8181	33.8754	35.2755	20.2988	27.5931	26.101				12.6522	16.6309	12.3052	17.3855	13.1913	11.6654	12.7126	15.6674
2700086A05Rik	0.379009	0.295211	0.230057	0.191498	0.342965	0.29773				0.110984	0.102187	0.125563	0.223209	0.0901453	0.102328	0.0594046	0.0412843
2700089E24Rik	46.564	44.4661	54.8687	51.4748	43.1824	54.7162				58.2555	59.4983	62.112	46.3282	47.6268	48.9896	69.5331	49.087
2700089I24Rik	0.0812163	0.221408	0	0.0382997	0.0311786	0				0.155378	0	0.125563	0.0744029	0.0300484	0.0511641	0.0594046	0.0206422
2700094K13Rik	19.7897	27.0856	35.1221	35.3506	22.8539	19.7494				17.0582	15.0726	20.2994	20.1384	18.2093	18.547	15.8016	14.5321
2700097O09Rik	16.0808	14.0594	12.8832	14.0177	15.9011	13.1001				10.1439	11.0106	10.5055	7.7875	11.0278	11.3329	8.67307	5.86237
2700099C18Rik	10.5581	10.111	17.0626	19.6094	10.3825	8.00564				10.9763	10.7807	9.66838	8.08511	11.6287	11.2305	10.0691	3.6743
2810001G20Rik	6.55145	5.86731	9.66241	5.74495	7.26461	8.46877				3.51819	4.08747	2.92981	2.95131	3.21518	4.16988	2.6138	3.71559
2810002D19Rik	5.36028	5.31379	4.17938	3.02567	5.08211	3.90358				2.92998	2.83569	1.96716	2.03368	2.28368	2.45588	2.70291	1.89908
2810004N23Rik	22.0908	25.2036	22.0472	20.7967	23.0722	16.8052				23.0514	21.1271	23.4803	18.6255	22.4762	20.6191	21.5639	16.7408
2810006K23Rik	12.3719	13.5428	14.2252	15.205	15.3399	12.4054				10.0108	10.4997	9.20798	7.7627	10.6071	9.977	9.44533	7.47246
2810007J24Rik	0	0	0	0	0	0				0	0	0	0	0	0	0	0
2810008D09Rik	15.1604	13.6904	21.7404	16.8136	20.4532	17.2684				7.33604	8.83916	6.78042	5.62982	9.10467	12.2538	7.8414	4.08715
2810013P06Rik	21.2787	17.2698	20.6668	19.4562	20.7649	19.5179				19.056	20.8206	17.0766	12.2021	16.4365	21.3866	20.5837	14.1192
2810021J22Rik	14.0775	10.111	9.93081	10.4175	11.349	10.7514				5.47151	5.4159	3.64134	4.58818	4.68755	4.29779	5.10879	3.38531
2810025M15Rik	17.0283	14.7236	18.5963	17.8476	18.9878	16.2428				14.0728	10.1931	14.5235	13.0205	13.8824	18.2144	12.9799	14.5527
2810029C07Rik	8.1487	6.05182	5.21463	6.35774	6.20454	4.99525				9.35595	9.55447	6.613	5.62982	9.04458	7.72578	4.81177	5.94494
2810032G03Rik	4.60226	3.46872	4.37109	2.52778	5.20682	5.45839				0.177574	0.15328	0.0837089	0.173607	0.180291	0.12791	0.267321	0.247706
2810047C21Rik1	3.84424	3.76393	4.67783	5.85985	6.2669	4.43287				5.98204	6.56551	6.48744	6.22504	8.6239	5.62805	5.94046	4.85091
2810049E08Rik	0	0	0	0	0	0				0	0	0	0.024801	0	0	0	0
2810055G20Rik	13.7526	9.48364	7.17012	6.70244	9.41593	8.83267				2.91888	2.2992	1.88345	1.16565	1.9231	1.2791	2.6435	1.52752
2810403A07Rik	164.138	118.638	141.102	111.452	147.693	110.028				153.702	164.853	115.728	112.844	148.139	157.406	128.373	95.8209
2810403D21Rik	1.43482	0.922533	3.60423	1.60859	2.05779	1.98487				1.93112	1.55835	0.920798	1.90967	1.20194	1.20236	2.13856	1.65137
2810404M03Rik	0	0	0	0	0	0				0	0	0	0	0	0	0	0
2810405F15Rik	0	0	0	0	0	0				0	0	0	0	0	0	0	0
2810408A11Rik	6.06415	5.16618	6.28823	5.09386	4.48972	3.77125				3.56259	2.65686	2.92981	2.75291	3.03489	3.86289	3.53457	2.82798
2810408I11Rik	0.758019	1.43915	1.11194	1.64689	1.02889	0.463136				1.14314	0.996322	1.33934	1.11604	1.29208	0.946536	0.683153	0.887613
2810408M09Rik	11.262	10.2586	10.736	10.1494	11.5673	10.3544				10.4214	9.27346	10.0032	9.07715	10.6071	10.6677	9.1483	8.17429
2810410L24Rik	6.14537	4.83407	6.78669	7.77483	6.57868	4.79677				2.44165	3.21889	1.9253	1.86007	2.97479	3.76056	3.11874	1.44495
2810417H13Rik	39.9313	65.426	87.2684	96.1705	40.7504	27.2589				56.6684	42.1521	53.4063	45.113	55.4994	43.7965	41.8208	26.1123
2810428I15Rik	16.1891	21.698	22.7757	23.1713	18.1148	18.9886				9.22277	11.3427	13.1842	12.3261	11.6287	15.2725	11.6136	12.0757
2810429I04Rik	0.703875	0.442816	0.881886	0.995791	0.810643	0.893191				0.0998856	0.127734	0.0837089	0.124005	0.0300484	0.12791	0.0594046	0.144495
2810433D01Rik	9.66474	5.6828	6.51829	7.27694	8.85472	7.5425				0.0776888	0.102187	0.125563	0.0744029	0.0300484	0.0511641	0.118809	0.0619265
2810442I21Rik	3.05915	3.09971	4.52446	6.54924	3.77261	1.72022				1.92002	1.17515	1.46491	1.11604	1.41228	2.17448	1.3069	0.846328
2810442N19Rik	0.622658	0.0369013	0.383429	0.574495	0.405322	0.363893				0.0332952	0.0255467	0	0	0.0300484	0	0	0
2810454H06Rik	2.3282	1.66056	3.37417	1.99158	1.62129	1.42249				1.32071	1.35398	1.04636	1.53766	1.05169	1.56051	1.60392	0.76376
2810459M11Rik	0	0	0	0.0765993	0.0311786	0				0	0	0	0	0.0901453	0	0	0
2810468N07Rik	0	0.295211	0	0.114899	0.187072	0.132325				0.0221968	0.0255467	0	0.024801	0	0.0511641	0	0.0619265
2810471M01Rik	0.0812163	0	0.0383429	0	0	0.0992434				0.0221968	0	0	0.024801	0	0.0255821	0.0594046	0.0206422
2810474O19Rik	63.3216	60.7027	66.7933	57.258	67.4081	75.822				63.7936	75.7971	58.0103	55.6286	57.3925	55.4107	67.8697	55.9196
2900005J15Rik	9.55645	6.93745	9.89247	7.65993	13.1885	6.81472				10.2105	8.5326	5.90148	6.39865	9.5554	9.20954	9.0295	3.75687
2900008C10Rik	0.108288	0.369013	0	0.459596	0.21825	0.0992434				0.0443936	0.0510934	0.0418545	0.024801	0.150242	0.0255821	0.0594046	0.144495
2900009J06Rik	0.568514	0.738026	0.690172	0.574495	0.65475	0.529298				0.421739	0.587575	0.251127	0.297612	0.600968	0.358149	0.683153	0.412843
2900011O08Rik	0	0.0738026	0	0.153199	0.0311786	0.0330811				0	0	0	0	0	0	0	0
2900026A02Rik	113.595	124.21	113.878	139.104	110.06	164.843				152.792	166.411	135.315	191.414	162.652	146.406	178.778	212.635
2900041M22Rik	7.17411	7.71238	10.6977	11.4516	5.73686	7.5425				0.399542	0.383201	0.0837089	0.421616	0.120194	0.230239	0.445534	0.165137
2900052N01Rik	0	0	0	0	0	0				0	0	0	0	0	0	0	0
2900055J20Rik	0	0	0	0	0	0				0.0110984	0	0.0418545	0	0.0300484	0	0.0297023	0
2900056M20Rik	19.9521	15.6093	21.6254	24.7416	21.3573	20.4111				19.4222	19.7987	11.3007	14.3598	15.0242	10.4631	21.8312	12.8601
2900057B20Rik	0.0812163	0	0	0.0765993	0	0.0330811				0.0110984	0.0255467	0	0.024801	0.0300484	0.0255821	0.0594046	0
2900060B14Rik	0.270721	0.0738026	0.153372	0.268098	0.530036	0.198487				0.244165	0.306561	0.460399	0.372014	0.360581	0.511641	0.326725	0.28899
2900076A07Rik	15.4852	9.96336	11.1961	10.0345	12.6897	10.3875				5.16076	5.13489	4.14359	2.38089	3.87625	4.93734	3.98011	1.83715
2900079G21Rik	0	0	0	0	0	0				0	0	0	0	0	0	0	0
2900092C05Rik	0	0	0	0	0	0				0	0	0.0418545	0	0	0	0	0
2900092D14Rik	0.0541442	0	0.0383429	0.0382997	0.0311786	0.0330811				0.055492	0.0255467	0	0.024801	0.120194	0.0255821	0.0297023	0
2900097C17Rik	255.588	241.925	246.852	227.347	225.452	238.449				258.837	240.88	207.891	187.371	203.127	202.482	235.48	165.364
3000002C10Rik	7.01167	3.54253	6.59498	4.78746	3.46082	2.87806				5.08307	4.77724	2.26014	3.42253	2.7945	5.11641	1.90095	2.24999
3010001F23Rik	1.05581	0.442816	1.22697	1.34049	1.3095	1.42249				0.0332952	0.0255467	0	0.024801	0	0.0511641	0.0891069	0
3010026O09Rik	5.03541	4.16985	7.40018	8.69402	5.89275	5.02833				8.64565	7.30636	8.4546	9.39956	9.01453	9.56769	8.82158	7.2454
3010033K07Rik	0	0	0	0	0	0				0	0	0	0	0	0	0	0
3100003L05Rik	0.379009	0.258309	0.575143	0.536195	0.21825	0.56238				0.0221968	0.0255467	0	0.0496019	0	0	0.0297023	0
3110001I22Rik	4.79176	4.76027	6.01983	4.25126	6.01747	4.99525				4.47266	5.64582	5.65035	3.89375	4.80775	4.47686	4.27713	6.29586
3110002H16Rik	52.3033	54.4663	42.6756	39.7551	62.1389	53.3268				57.978	54.8233	53.0296	48.2627	59.7062	59.3504	49.3355	44.2568
3110007F17Rik	1.73261	1.14394	1.26532	1.80008	2.40075	2.2826				0.221968	0.281014	0.460399	0.322413	0.360581	0.332567	0.475237	0.268348
3110009E18Rik	3.89838	2.8783	4.48612	2.91077	3.18022	2.31568				3.01876	2.42694	2.21829	2.6537	2.01324	3.19776	2.5544	1.87844
3110009F21Rik	0	0	0	0	0	0				0	0	0	0	0	0	0	0
3110015C05Rik	0.0270721	0	0.230057	0.0765993	0	0				0.0110984	0	0	0.024801	0.0300484	0	0	0.0206422
3110021A11Rik	0.51437	0.332112	0.2684	0.191498	0.280607	0.529298				0.155378	0.204374	0.125563	0.173607	0.120194	0.102328	0.237618	0.371559
3110021N24Rik	1.48897	0.738026	2.03217	1.26389	1.21597	1.29016				1.05435	0.868588	0.627817	0.198408	0.600968	0.74188	0.534641	0.412843
3110035E14Rik	0	0	0	0	0	0				0	0	0	0	0	0	0	0
3110039I08Rik	0.0270721	0.147605	0	0.0382997	0.0311786	0				0	0	0	0	0	0	0	0
3110039M20Rik	0	0	0	0	0	0				0	0	0	0	0	0	0	0
3110040N11Rik	11.4786	10.8859	12.0013	15.0135	11.349	10.3875				9.7333	7.79175	10.6729	9.96999	9.25491	9.51653	10.7819	7.61696
3110043O21Rik	26.1516	21.8825	21.587	23.7458	26.4394	25.0424				33.8501	36.5829	29.7167	26.2642	29.8982	30.1868	28.6627	22.0458
3110045C21Rik	0.243649	0.369013	0.345086	0.651094	0.592393	0.264649				1.78684	0.945229	1.59047	0.793631	0.991598	0.818626	1.12869	0.701833
3110052M02Rik	15.404	13.7642	15.1071	13.8645	19.4554	17.2684				12.4413	12.0581	11.6774	8.90355	11.9292	10.6933	14.1977	8.2775
3110056K07Rik	14.2399	12.2143	10.2759	9.95791	12.222	10.4536				11.0096	11.8026	11.1333	6.57226	9.6155	11.5119	10.2176	10.5069
3110057O12Rik	12.1283	7.97068	9.81578	9.80471	11.6296	13.7618				8.3349	9.04354	6.94784	7.09308	8.02293	6.77925	9.71265	5.90366
3110062M04Rik	24.4461	22.7312	14.762	18.0008	19.0813	14.7873				10.3215	9.42674	9.54282	6.62186	10.0963	10.4631	7.98992	5.47017
3110070M22Rik	0.51437	0.221408	0.843544	0.268098	0.4365	0.992434				0.388444	0.281014	0.209272	0.272811	0.240387	0.230239	0.297023	0.227064
3110079O15Rik	0.0270721	0.0738026	0	0.344697	0.187072	0.396974				0	0	0	0	0	0	0	0
3110082I17Rik	9.04208	9.85265	12.078	12.1027	11.4114	10.4536				6.48147	6.69324	6.90598	7.19228	6.55056	7.34205	6.86123	6.00687
3110082J24Rik	0	0	0	0	0	0				0	0	0	0	0	0	0	0
3110099E03Rik	0	0	0.0383429	0	0	0				0	0	0.0837089	0	0	0	0.0594046	0
3200001D21Rik	0	0	0	0	0	0.0330811				0	0	0	0	0	0.0511641	0	0
3300002I08Rik	0.460226	0.442816	0.958572	0.536195	1.06007	0.529298				0.310755	0.562028	0.585962	0.396815	0.39063	0.358149	0.297023	0.206422
3300005D01Rik	0.0812163	0	0	0	0	0				0	0.0510934	0	0.024801	0	0.0255821	0	0
3425401B19Rik	0.0270721	0	0	0.0382997	0	0				0	0	0	0	0	0	0	0.0206422
3632451O06Rik	24.392	16.2366	15.4522	18.7668	20.5467	19.4517				1.68696	1.86491	1.50676	1.56246	1.80291	1.20236	1.60392	1.15596
3632454L22Rik	0.0541442	0	0	0.114899	0.0311786	0.0330811				0	0.0766402	0	0.024801	0.0300484	0.0255821	0.0594046	0.0206422
3830403N18Rik	0	0	0	0	0	0				0	0	0	0	0.0300484	0	0	0.0206422
3830406C13Rik	68.2488	51.3297	56.364	56.2239	62.8249	59.5791				54.8927	51.7321	50.3509	37.0526	41.1964	46.6873	50.9097	37.6926
3830408C21Rik	4.27739	2.36168	3.4892	4.17466	5.36272	3.96974				3.06316	3.80646	1.63232	2.30649	3.15508	3.30009	3.08904	2.00229
3830417A13Rik	0	0	0.0766858	0	0	0				0	0	0.0418545	0	0	0	0	0
3930402G23Rik	0	0.0369013	0	0	0	0				0	0	0.0418545	0.024801	0.0300484	0.0511641	0	0.0206422
4430402I18Rik	0.189505	0.147605	0.2684	0.191498	0.405322	0.330811				0.0332952	0.102187	0.0418545	0.024801	0.0600968	0.102328	0.0594046	0.0619265
4631405J19Rik	0	0	0	0	0.124714	0.0661623				0.266362	0.102187	0.37669	0.471218	0.360581	0.486059	0.148511	0.433485
4632415L05Rik	26.8555	24.2442	23.6576	23.516	27.4372	28.8137				16.8363	17.0397	10.7566	13.2189	14.0026	15.5027	17.0788	12.6536
4632427E13Rik	1.38068	1.14394	0.690172	0.612795	1.24714	0.463136				0.699199	0.613121	0.627817	0.421616	0.691114	0.588387	0.564343	0.454127
4632428C04Rik	0.379009	0.405914	0.153372	0.229798	0.155893	0.29773				0.0332952	0.102187	0.0418545	0.148806	0.150242	0.0255821	0.178214	0.0412843
4632428N05Rik	190.588	130.741	124.883	106.128	154.209	108.738				29.6549	40.3383	26.0335	30.2324	40.7156	31.4915	34.6032	32.1398
4632434I11Rik	10.2603	12.3619	18.1745	16.0093	12.3467	6.68239				14.4834	17.4229	17.7463	15.203	18.6901	16.4493	13.2472	15.399
4732416N19Rik	0.433154	0.369013	0.230057	0.344697	0.467679	0.363893				0.27746	0.306561	0.167418	0.198408	0.180291	0.332567	0.267321	0.227064
4732456N10Rik	1.70554	3.61633	1.15029	2.25968	2.49429	1.55481				0	0.102187	0.0418545	0.0496019	0.0300484	0.12791	0.0594046	0.0206422
4732471J01Rik	1.94919	1.07014	1.84046	2.37458	3.2114	2.48109				0.543822	0.689761	0.251127	0.471218	0.510823	0.358149	0.594046	0.516054
4732490B19Rik	2.49063	1.62366	0.805201	1.14899	1.12243	1.29016				2.0976	1.94155	2.80425	1.61206	2.04329	2.12331	2.19797	1.25917
4732491K20Rik	2.97793	2.21408	2.1472	2.68098	3.30493	2.15027				1.76465	0.945229	0.837089	1.01684	1.53247	1.66283	1.48511	0.825686
4831440E17Rik	4.6564	4.50196	3.91097	4.13636	5.48743	4.96217				5.14966	4.08747	3.26465	2.90171	3.48562	5.01408	4.60385	2.97247
4833403I15Rik	0	0	0	0	0.0623572	0				0	0	0	0	0.0300484	0.0255821	0	0
4833411C07Rik	0	0	0	0	0	0				0	0	0	0	0	0	0	0
4833412C05Rik	0.108288	0	0	0	0.405322	0.132325				0	0	0	0	0.0300484	0	0	0
4833417C18Rik	0.703875	0.774928	1.80212	0.727694	0.374143	1.15784				0.399542	0.689761	0.334836	0.372014	0.420678	0.665134	0.475237	0.268348
4833418N02Rik	5.06248	4.76027	6.17321	5.78325	4.77032	4.43287				2.98547	3.21889	2.46941	2.75291	2.8546	3.35125	3.35636	2.60091
4833419F23Rik	1.21824	1.18084	1.45703	1.80008	1.21597	1.7533				0.954462	0.894135	0.585962	1.04164	1.08174	0.74188	0.65345	0.949539
4833420G17Rik	134.738	95.6113	130.864	94.6385	117.013	109.73				122.426	132.358	94.6329	116.292	101.474	114.915	113.463	93.3645
4833422C13Rik	0.568514	1.21774	0.498458	0.382997	0.249429	0.165406				0.0443936	0.0255467	0.0837089	0.024801	0.0901453	0	0.148511	0
4833423E24Rik	7.85091	4.02224	6.74835	8.00463	5.11329	5.39223				62.1621	43.6338	48.9697	47.3946	49.2494	56.127	62.7906	49.0251
4833424O15Rik	0	0	0	0	0	0				0	0	0	0	0	0	0	0
4833427F10Rik	0.379009	0.110704	0.345086	0.497896	0.405322	0.595461				0.155378	0.255467	0.125563	0.148806	0.300484	0.204656	0.148511	0.0825686
4833427G06Rik	0.243649	0.369013	0.421772	0.344697	0.155893	0.0330811				0.0443936	0	0.251127	0	0.0300484	0.0767462	0.0297023	0.0619265
4833428L15Rik	0	0	0	0.0382997	0	0.0330811				0	0	0	0	0	0	0	0
4833439L19Rik	84.2484	85.9063	73.2733	76.0248	76.8241	74.0687				99.3196	87.4209	93.4191	78.7679	92.1585	91.3791	100.216	91.2796
4921501E09Rik	0	0	0	0	0	0				0	0	0	0	0	0	0	0
4921504A21Rik	0.0270721	0.0369013	0	0	0.0623572	0				0.0998856	0.127734	0.0418545	0.124005	0.210339	0.0511641	0.118809	0.103211
4921504E06Rik	0.0270721	0	0	0	0	0				0.0110984	0	0	0	0	0	0	0
4921506M07Rik	0	0	0	0	0	0				0	0	0	0	0	0	0	0
4921507L20Rik	0	0	0	0	0.0311786	0				0.0110984	0	0.0418545	0	0	0	0	0
4921507P07Rik	0.920451	0.55352	1.30366	1.45539	1.18479	1.62098				0.466133	0.459841	0.167418	0.570422	0.360581	0.332567	0.534641	0.660549
4921508D12Rik	0	0	0	0	0	0				0	0	0	0	0	0	0	0
4921509C19Rik	0	0	0	0	0	0				0	0	0	0	0	0	0	0
4921509O07Rik	0	0	0	0	0	0				0	0	0	0	0	0	0.0297023	0.0206422
4921511C10Rik	0	0	0	0	0	0				0	0	0	0	0	0	0	0
4921511C20Rik	0	0	0	0	0	0				0	0	0	0	0	0	0	0
4921511H03Rik	0	0	0	0	0	0				0	0	0	0	0	0	0	0
4921511I17Rik	0	0	0	0	0	0				0	0	0	0	0	0	0	0
4921511M17Rik	0	0	0	0	0	0				0	0	0	0	0	0	0	0
4921513I03Rik	0	0	0	0.114899	0	0.0661623				0	0.0255467	0	0.024801	0	0	0	0
4921515E04Rik	0.351937	0.258309	0.460115	0.153199	0.249429	0.330811				0.299657	0.255467	0.209272	0.421616	0.330533	0.255821	0.415832	0.412843
4921517D22Rik	0	0.110704	0	0	0	0				0	0	0	0	0	0	0	0.0206422
4921524J17Rik	9.66474	11.956	10.2376	11.4133	11.5984	9.89126				11.0318	13.7697	11.4681	10.9372	14.3031	12.9957	15.1185	14.3463
4921524L21Rik	0	0	0	0	0	0				0	0	0	0	0	0	0	0
4921525O09Rik	0	0	0	0.114899	0	0				0	0	0	0	0	0	0	0
4921529L05Rik	0.0270721	0	0.0383429	0.0382997	0.0311786	0.0661623				0.0221968	0.0255467	0.0418545	0.0992039	0	0	0.0297023	0.0412843
4921530L21Rik	0	0	0	0	0	0				0	0	0	0	0	0	0	0
4921531C22Rik	2.38234	2.10338	1.41869	1.87668	1.49657	1.78638				1.80904	1.25179	1.25563	1.38885	1.47237	1.2791	1.69303	1.48624
4921531P14Rik	0	0	0	0	0	0				0	0	0	0	0	0	0	0
4921533I20Rik	0.0541442	0	0	0.0382997	0	0				0	0	0	0	0	0	0	0
4921534H16Rik	0	0	0	0	0	0				0	0	0	0	0	0	0	0
4921536K21Rik	0.622658	0.590421	1.11194	0.612795	0.997715	0.926272				0.399542	0.740855	1.08822	0.620024	0.600968	0.86979	0.326725	0.619265
4921539E11Rik	0	0	0	0	0	0				0	0	0	0	0	0	0	0
4922502D21Rik	0	0	0	0	0	0				0	0	0	0	0	0	0	0
4922502H24Rik	0	0	0	0	0	0				0	0	0	0	0	0	0	0
4922502N22Rik	0	0	0	0	0	0				0	0	0	0	0	0	0	0
4930401C15Rik	0	0	0	0	0	0				0	0	0	0	0	0	0	0
4930401O10Rik	0	0	0	0	0	0				0	0	0	0	0	0	0	0
4930401O12Rik	0	0	0	0	0	0				0	0	0	0	0	0.0511641	0	0
4930402F06Rik	0	0	0	0	0	0				0.0221968	0.0255467	0.125563	0.272811	0.0600968	0.0511641	0.0594046	0.185779
4930402F11Rik	0	0	0.0383429	0	0	0				0	0	0	0	0	0	0	0
4930402H24Rik	48.3237	44.5768	32.5531	30.9461	36.2607	35.4299				15.3158	16.6054	12.64	15.4014	15.5951	15.0167	15.0591	15.1926
4930402K13Rik	0	0	0	0	0	0				0	0	0	0	0	0	0	0
4930404A05Rik	0	0	0	0	0	0				0	0	0	0	0	0	0	0
4930404A10Rik	0	0	0	0	0	0				0	0	0	0	0	0	0	0
4930404H11Rik	0	0	0	0	0	0				0	0	0	0	0	0	0	0.0206422
4930404I05Rik	0.0270721	0	0	0	0.0311786	0				0.0110984	0.0255467	0	0	0.0300484	0	0.0297023	0
4930404N11Rik	0.0541442	0.0738026	0	0.0765993	0.0935358	0.0330811				0.0776888	0.0766402	0.167418	0.0744029	0.0600968	0.0511641	0.0594046	0
4930405A10Rik	0	0	0	0	0	0				0	0	0	0	0	0	0	0
4930405A21Rik	0.568514	0.442816	0.460115	0.765993	0.530036	0.231568				0.321854	0.204374	0.125563	0.223209	0.210339	0.383731	0.118809	0.185779
4930405D11Rik	0	0	0	0	0	0				0	0	0	0	0	0	0	0
4930405J17Rik	0	0	0	0	0	0				0	0	0	0	0	0	0	0
4930405L22Rik	0	0	0	0	0	0				0	0	0	0	0	0	0	0
4930406D18Rik	0	0	0	0	0	0				0	0	0	0	0	0	0	0
4930407I10Rik	0	0	0	0	0	0.0992434				0.0110984	0	0	0.024801	0	0.0255821	0	0
4930412B13Rik	0.162433	0.258309	0.383429	0.153199	0.0623572	0				0.0998856	0.0510934	0	0.0992039	0	0	0	0.0206422
4930412C18Rik	0.297793	0.147605	0	0.191498	0.21825	0.165406				0.144279	0.102187	0.125563	0.024801	0.120194	0.0255821	0.0594046	0.206422
4930412D23Rik	0	0	0	0	0	0				0	0	0	0	0	0	0	0
4930412O13Rik	27.1804	20.923	33.2816	12.6772	10.6007	10.5529				57.8116	59.5749	43.7379	41.9136	41.4668	48.2222	51.8602	31.9747
4930413E15Rik	0	0	0	0	0	0				0	0	0	0	0	0	0	0
4930413F20Rik	0	0	0	0	0.0311786	0.0661623				0.0110984	0	0.0418545	0.0496019	0.0300484	0	0.0297023	0.0206422
4930413G21Rik	0.0541442	0	0	0.229798	0.0623572	0.0661623				0.055492	0.0510934	0.0418545	0.173607	0.0600968	0.0767462	0.0891069	0.0619265
4930413M19Rik	0	0	0	0	0	0				0	0	0	0	0	0	0	0
4930414L22Rik	6.33487	5.01858	7.01675	8.57913	6.984	8.10488				4.1286	3.55099	3.68319	4.24096	4.8378	4.4257	4.39594	3.73623
4930414N06Rik	0	0	0	0	0	0				0	0.0255467	0	0	0	0	0	0
4930415F15Rik	0.0812163	0	0.0766858	0	0.0311786	0.0330811				0	0	0	0	0	0	0	0.0206422
4930415L06Rik	0	0	0	0	0	0				0	0	0	0	0	0	0	0
4930415O20Rik	0	0.0369013	0.115029	0.114899	0	0.0330811				0.122082	0.15328	0.0418545	0.0744029	0.240387	0.204656	0.148511	0.165137
4930417O13Rik	0.108288	0	0.115029	0.0382997	0.0935358	0				0.499428	0.15328	0.418545	0.0496019	0.240387	0.153492	0.415832	0.0825686
4930417O22Rik	0.162433	0.0738026	0.0383429	0.114899	0.280607	0.0661623				0.0665904	0.0766402	0	0.024801	0.0600968	0.12791	0.148511	0.0412843
4930419G24Rik	0	0	0	0	0	0				0	0	0	0	0	0	0	0
4930423M02Rik	0	0	0	0	0	0				0	0	0	0	0	0	0	0
4930425K10Rik	0	0	0	0	0	0				0	0	0	0	0	0	0	0
4930425O10Rik	0	0	0	0	0	0				0.0110984	0	0	0	0	0	0	0
4930426D05Rik	0	0	0	0	0	0				0	0	0	0	0	0	0	0
4930426L09Rik	0	0	0	0	0.0935358	0				0.0443936	0.15328	0	0.0744029	0.0600968	0.0511641	0.0891069	0.0619265
4930427A07Rik	31.7014	28.4878	53.565	46.266	29.2143	24.3477				13.2737	10.7552	13.3516	12.1773	15.3247	11.2561	10.9007	8.2775
4930428D18Rik	0	0	0	0	0	0				0	0	0	0	0	0	0	0
4930428E07Rik	0	0	0	0	0	0				0	0	0	0	0	0	0	0
4930428G15Rik	0	0	0	0	0.0311786	0				0	0	0	0	0	0	0	0
4930428O21Rik	0	0	0	0	0	0				0	0	0	0.024801	0.0300484	0	0	0.0206422
4930429B21Rik	1.00167	1.25464	1.22697	0.459596	1.02889	0.727785				1.25412	0.740855	0.920798	0.793631	0.871404	0.972118	0.980176	0.57798
4930429D17Rik	0.0270721	0	0	0.0765993	0	0				0	0	0	0	0	0.0255821	0	0
4930429F11Rik	0.0541442	0	0	0	0	0				0	0	0	0	0	0	0	0
4930429F24Rik	0.13536	0.0738026	0	0	0	0.231568				0.0221968	0.0766402	0.0837089	0.0744029	0	0.0767462	0.148511	0.0619265
4930430A15Rik	0	0	0	0	0	0				0	0	0	0	0	0	0	0
4930430D24Rik	0	0	0	0	0	0				0	0	0	0	0	0	0	0
4930430F08Rik	10.6123	9.04082	10.8127	10.5324	11.1931	10.2221				15.1382	15.558	14.942	12.0781	13.8523	12.8422	19.2471	11.2706
4930430F21Rik	0	0	0.115029	0	0	0				0	0	0	0	0	0	0	0
4930430J02Rik	0	0	0	0	0	0				0	0	0.0418545	0	0	0	0	0
4930431F12Rik	2.54478	1.73436	1.99383	1.95328	2.58782	1.95179				2.17529	2.50358	1.71603	1.78567	2.13344	1.9954	1.81184	1.52752
4930431P03Rik	0.730947	1.18084	0.805201	0.497896	1.02889	0.628542				0.421739	0.613121	0.544108	0.297612	0.420678	0.230239	0.38613	0.103211
4930432J09Rik	0.0541442	0	0	0	0	0				0	0	0	0	0	0	0.0297023	0
4930432K21Rik	1.21824	1.43915	1.84046	2.37458	1.80836	1.72022				0.399542	0.281014	0.544108	0.148806	0.39063	0.562805	0.445534	0.28899
4930432M17Rik	0	0	0	0	0	0				0	0	0	0	0	0	0	0
4930433B08Rik	0	0	0	0	0	0				0	0	0	0	0	0	0	0
4930433I11Rik	0	0	0	0	0	0				0	0	0	0	0	0	0	0
4930433N12Rik	0.0270721	0.0369013	0.306743	0	0.0623572	0.0330811				0.0221968	0.0255467	0.0418545	0	0.0300484	0.0767462	0.0297023	0.0412843
4930434J06Rik	0	0	0	0	0	0				0	0	0	0	0	0	0	0
4930435E12Rik	0	0	0	0	0	0				0	0	0	0	0	0	0	0
4930438E09Rik	0	0	0	0	0	0				0	0	0	0	0	0	0	0
4930440C22Rik	0	0	0	0	0	0				0	0	0	0	0	0	0	0
4930440I19Rik	0	0	0	0	0	0				0	0	0	0	0	0	0	0
4930441J16Rik	0	0	0	0	0	0				0	0	0	0	0	0	0	0
4930442J19Rik	0	0	0	0	0	0				0	0	0	0	0	0	0	0
4930442L01Rik	0	0	0	0	0	0				0	0	0	0	0	0	0	0
4930443O20Rik	0	0	0	0	0	0				0	0	0	0	0	0	0	0
4930444F02Rik	0	0	0	0	0	0				0	0	0	0	0	0	0	0
4930444G20Rik	0.216577	0.295211	0.613486	0.536195	0.280607	0.430055				0.21087	0.613121	0.37669	0.322413	0.721162	0.12791	0.564343	0.598622
4930444M15Rik	0	0	0	0	0	0				0.0110984	0.0766402	0.0418545	0	0.0300484	0	0	0.0412843
4930444P10Rik	0.0812163	0	0	0	0	0.132325				0	0	0.0418545	0	0	0.0511641	0	0
4930447A16Rik	0	0	0	0	0	0				0	0	0	0	0	0	0	0
4930447C04Rik	0	0	0	0	0	0.0661623				0	0	0	0	0	0	0	0
4930447J18Rik	0.13536	0	0.0766858	0.0382997	0.0623572	0.0661623				0	0.0255467	0.0837089	0.024801	0	0	0	0.0412843
4930447K03Rik	0.0270721	0	0	0	0	0				0	0.0255467	0	0	0	0	0	0.0206422
4930447N08Rik	0	0	0	0	0	0				0	0	0	0	0	0	0	0
4930448C13Rik	0	0	0	0	0	0				0	0	0	0	0	0	0	0
4930448F12Rik	0	0	0	0	0	0				0	0	0	0	0	0	0	0
4930448H16Rik	0	0	0	0	0	0				0	0	0	0	0	0	0	0
4930448I06Rik	0.0270721	0	0	0	0	0				0	0	0	0	0	0	0	0
4930448I18Rik	0	0	0.153372	0	0	0				0	0	0	0	0	0	0	0
4930448K20Rik	0.0270721	0	0	0	0	0				0	0	0	0	0	0	0	0
4930449E01Rik	0	0	0	0	0	0				0	0	0	0	0	0	0	0
4930449E18Rik	0	0	0	0	0	0				0	0.0510934	0	0	0.0300484	0.0255821	0	0
4930449I24Rik	0	0	0	0	0	0				0	0	0	0	0	0	0	0
4930451C15Rik	0.460226	0.0369013	0.0766858	0	0.187072	0.132325				0.221968	0.255467	0.251127	0.223209	0.240387	0.230239	0.267321	0.309632
4930451G09Rik	7.9592	6.97435	8.70384	6.35774	5.45625	6.48391				0.654806	0.357654	0.585962	0.52082	0.600968	0.486059	0.950473	0.350917
4930451I11Rik	0	0	0	0	0	0				0	0	0	0	0	0.0255821	0	0
4930452A19Rik	0	0	0	0	0	0				0	0	0	0	0	0	0	0
4930452B06Rik	0.243649	0.405914	0.306743	0.191498	0.187072	0.430055				0.0110984	0.0255467	0	0.024801	0.0300484	0.0255821	0.0297023	0.0206422
4930452G13Rik	0.13536	0.332112	0	0	0	0				0	0	0	0	0.0300484	0	0	0.0206422
4930452N14Rik	0	0	0	0	0	0				0	0	0	0	0	0	0	0
4930453H23Rik	0	0	0	0	0	0.0330811				0.0110984	0.0255467	0	0	0.0300484	0	0	0.0412843
4930453L07Rik	0	0	0	0	0	0				0	0	0	0	0	0	0	0
4930453N24Rik	26.1516	28.8568	23.7342	20.452	25.5664	22.9583				25.2933	25.981	26.2846	18.6503	20.8536	24.0471	24.148	19.3417
4930455B14Rik	0	0	0	0	0	0				0	0	0	0	0	0	0	0
4930455C13Rik	0	0	0.0766858	0	0	0				0	0	0	0	0	0	0	0
4930455D15Rik	0	0	0	0	0	0.0661623				0.0110984	0.0255467	0.0418545	0.0744029	0	0.0255821	0	0
4930455F16Rik	0	0	0	0	0	0				0	0	0	0	0	0	0	0
4930455H04Rik	0	0	0	0.0382997	0	0				0.0221968	0.0510934	0.0418545	0	0	0.0255821	0	0.0412843
4930455J16Rik	0	0	0	0	0	0				0	0	0	0	0	0	0	0
4930456L15Rik	0	0	0	0	0	0				0	0	0	0	0	0	0	0
4930459C07Rik	0.0541442	0	0	0	0	0				0.0110984	0.0255467	0	0.024801	0	0	0	0
4930459L07Rik	0	0	0	0	0	0				0	0	0	0	0	0	0	0
4930461G14Rik	0	0.147605	0	0	0	0				0	0	0	0	0	0	0.0297023	0
4930463O16Rik	0	0	0	0	0	0				0.0221968	0	0	0	0	0	0	0
4930465K10Rik	0.0812163	0.147605	0.191714	0.0382997	0	0				0.0332952	0.0255467	0	0.024801	0.0300484	0.0255821	0	0.0412843
4930465M20Rik	0	0	0	0	0	0				0	0	0	0	0	0	0	0
4930467D21Rik	0	0	0	0	0	0				0	0	0	0.024801	0	0	0	0.0206422
4930467E23Rik	0	0	0	0.0382997	0	0				0	0.0255467	0	0.024801	0	0	0	0
4930467K11Rik	0	0.0369013	0.0766858	0.0765993	0	0.0330811				0.133181	0.102187	0.0418545	0.173607	0.0901453	0.255821	0.0891069	0.144495
4930468A15Rik	0	0	0	0	0	0				0	0	0	0	0	0	0	0
4930469G21Rik	0	0	0	0	0	0				0.0110984	0.0255467	0	0	0	0	0	0.0206422
4930470H14Rik	27.2887	22.0301	31.5945	30.1418	31.8333	27.4243				25.1157	24.2183	19.253	16.195	23.1373	17.2167	27.0291	17.422
4930470P17Rik	0	0	0	0	0	0				0	0	0	0	0	0	0	0
4930471C04Rik	0	0	0	0	0	0				0	0	0	0.0496019	0	0	0	0
4930471G03Rik	0	0	0	0	0	0				0	0	0	0	0	0	0	0.0206422
4930471M09Rik	0.0812163	0.221408	0	0	0.0935358	0				0.0332952	0.0510934	0.0418545	0	0	0.0255821	0	0
4930473A02Rik	0.189505	0	0.230057	0	0.124714	0.0661623				0.0776888	0.102187	0.0837089	0	0.120194	0.0511641	0.0594046	0
4930473O22Rik	0	0	0	0	0	0				0	0	0	0	0	0	0	0
4930474G06Rik	0.297793	0.221408	0.191714	0.0382997	0.311786	0.264649				0.155378	0.178827	0.167418	0.148806	0.120194	0.179074	0.0891069	0.103211
4930474H20Rik	0	0	0	0	0	0				0	0	0	0	0	0	0	0
4930474M22Rik	0	0	0	0	0	0				0	0	0	0	0	0.0255821	0	0
4930474N05Rik	0	0	0	0	0	0				0	0	0	0	0	0	0	0
4930474N09Rik	0.487298	0.0738026	0.2684	0.0765993	0.249429	0.0330811				0.122082	0.204374	0.334836	0.446417	0.210339	0.358149	0.415832	0.268348
4930478L05Rik	0	0	0	0	0.0311786	0.0330811				0.0110984	0.0510934	0	0	0	0	0.0297023	0
4930478P22Rik	0	0	0	0	0	0				0	0	0	0	0	0	0	0
4930479D17Rik	0.0812163	0.0369013	0.0766858	0	0.0311786	0				0.055492	0.0255467	0.0837089	0.124005	0.0901453	0.153492	0.0594046	0.0619265
4930480E11Rik	0	0	0	0	0	0				0	0	0	0	0	0	0	0
4930480G23Rik	0	0	0	0	0.0623572	0				0.0110984	0	0	0	0	0	0.0297023	0
4930480K15Rik	0	0	0	0	0	0.0330811				0	0.0255467	0	0.024801	0.0300484	0	0.0297023	0
4930480M12Rik	0	0	0	0	0	0				0	0	0	0	0	0	0	0
4930481A15Rik	2.3282	2.47239	4.63949	8.80892	4.24029	2.61341				0.89897	0.868588	1.04636	2.33129	1.59257	1.12561	4.33653	1.03211
4930482G09Rik	0	0	0	0	0	0				0	0	0	0	0	0	0	0
4930483J18Rik	0.0270721	0.0738026	0	0	0.0311786	0.132325				0.0332952	0.178827	0.0837089	0.0992039	0.120194	0.0767462	0	0.0825686
4930483K19Rik	0	0	0	0	0	0.0330811				0	0	0	0	0	0	0	0
4930483O08Rik	0.622658	0.258309	0.651829	0.382997	0.187072	0.463136				0.177574	0.102187	0.125563	0.173607	0.0901453	0.0767462	0.148511	0.144495
4930486F22Rik	0.0270721	0.147605	0	0	0	0				0	0	0	0	0	0	0	0
4930486I03Rik	0	0	0	0	0	0				0	0	0	0	0	0	0	0
4930486L24Rik	0	0.184507	0.460115	0	0.0311786	0				0.0221968	0	0.0418545	0	0	0.0255821	0	0
4930487D11Rik	0	0	0	0	0	0				0	0	0	0	0	0	0.0297023	0
4930487H11Rik	0	0	0	0	0	0				0.0110984	0	0	0.0496019	0	0	0	0.0206422
4930488B22Rik	0.108288	0	0	0	0.0311786	0				0	0.0255467	0.0418545	0	0	0	0.0297023	0
4930488L21Rik	0	0	0	0	0	0				0	0	0	0	0	0	0	0
4930500F04Rik	0	0	0	0	0	0				0	0	0	0	0	0	0	0
4930500J02Rik	0.0270721	0.147605	0.115029	0	0.124714	0.132325				0.288558	0.178827	0.209272	0.297612	0.150242	0.690716	0.564343	0.392201
4930500L23Rik	0.0541442	0	0	0	0	0				0	0	0	0.024801	0	0	0	0
4930502A04Rik	0	0	0	0	0	0				0	0	0	0	0	0	0	0
4930502E09Rik	0	0.184507	0	0	0	0				0.0110984	0	0	0	0	0.0255821	0	0
4930502E18Rik	0	0	0	0	0	0				0	0	0	0	0	0	0	0
4930503B20Rik	0	0.369013	0.230057	0	0.0935358	0.132325				0.0221968	0.0510934	0.0418545	0	0	0	0	0
4930503E14Rik	0	0	0.0766858	0.0382997	0	0				0.0332952	0.102187	0	0.124005	0.0600968	0.0767462	0.0297023	0.0619265
4930503E24Rik	0	0.0369013	0	0	0	0				0.0332952	0	0	0	0.0300484	0	0	0
4930503H13Rik	0	0	0	0	0	0				0	0	0	0	0	0	0	0
4930503L19Rik	9.06915	10.7752	11.7713	10.0728	9.88361	6.81472				1.07654	1.17515	0.920798	1.16565	0.661065	1.2791	0.891069	1.07339
4930503O07Rik	0	0	0	0	0	0				0	0	0	0	0	0	0	0
4930504O13Rik	0	0	0	0	0	0				0	0	0	0	0	0	0	0
4930505A04Rik	1.00167	0.627322	0.728515	0.459596	1.09125	0.628542				0.0443936	0.15328	0.0418545	0.0744029	0.0901453	0	0.0594046	0.0206422
4930505G20Rik	0	0	0	0	0	0				0	0	0	0	0	0	0	0
4930506C21Rik	0.108288	0.664224	0.5368	0.191498	0.405322	0.661623				0.0998856	0.204374	0.0418545	0.272811	0.0600968	0.0511641	0.178214	0.123853
4930506M07Rik	105.662	102.401	74.5769	94.2555	92.4757	68.478				162.503	150.445	127.782	115.746	126.714	117.473	142.571	96.7085
4930507D05Rik	0.0270721	0.0369013	0.0766858	0	0.0935358	0.0661623				0.0443936	0.0255467	0.0837089	0.124005	0.0300484	0.0767462	0.118809	0.0412843
4930507D10Rik	0	0	0	0	0	0				0	0	0	0	0	0	0	0
4930509E16Rik	0.0270721	0.221408	0.0766858	0.0765993	0.0311786	0.0661623				0.055492	0.0766402	0.0418545	0.0744029	0.0300484	0.0255821	0.118809	0.0412843
4930509J09Rik	0.0270721	0	0	0.114899	0.155893	0.0330811				0.0110984	0.0766402	0	0	0	0	0	0
4930509K18Rik	0	0	0	0	0.0935358	0				0	0	0	0	0	0	0	0
4930511A02Rik	0.270721	0.110704	0.230057	0.229798	0.21825	0.132325				0.0443936	0.0510934	0.0837089	0	0	0	0	0.0206422
4930511E03Rik	0.0270721	0.0369013	0	0.153199	0.0623572	0.0992434				0.0665904	0.15328	0.125563	0.0992039	0.0901453	0.204656	0.0891069	0.165137
4930511M06Rik	13.13	9.52054	10.9661	12.4091	12.2532	11.5784				13.0961	12.6967	8.24533	9.96999	11.779	9.10721	13.9898	9.12383
4930512B01Rik	0	0	0	0	0	0				0.0110984	0	0	0	0	0	0	0
4930513D17Rik	0	0	0	0	0	0				0.0221968	0	0	0.024801	0	0.0255821	0	0.0206422
4930513N10Rik	0.676802	0.516618	0.690172	0.727694	0.498857	0.198487				0.466133	0.383201	0.292981	0.372014	0.300484	0.537223	0.297023	0.412843
4930513O06Rik	0	0	0	0	0	0				0	0	0	0	0	0	0	0
4930515B02Rik	0	0	0	0	0	0				0	0	0	0	0	0	0	0
4930515G01Rik	1.05581	0.84873	0.690172	0.536195	0.935358	0.463136				1.19863	1.02187	0.544108	1.19045	0.781259	0.895372	0.594046	0.350917
4930515G16Rik	0	0	0	0	0	0				0	0	0	0	0	0	0	0
4930515L03Rik	0	0	0	0	0	0				0	0	0	0	0	0	0	0
4930515L19Rik	0	0	0	0	0	0				0	0	0	0	0	0	0	0
4930517E11Rik	0	0	0	0	0	0				0	0	0	0	0	0	0	0
4930518P08Rik	0	0	0	0	0.0311786	0				0.0110984	0	0	0	0.0300484	0	0.0297023	0
4930519D14Rik	0	0	0	0	0	0				0	0	0	0	0	0	0	0
4930519F09Rik	1.19117	0.922533	1.53372	1.30219	1.40304	0.926272				0.932266	1.07296	0.795235	0.545621	0.661065	0.9977	0.920771	0.970181
4930519F16Rik	0	0	0	0	0	0				0	0	0	0	0	0	0	0
4930519F24Rik	0	0	0	0	0	0				0	0	0	0	0	0	0	0
4930519G04Rik	0.13536	0.110704	0.0766858	0.344697	0.405322	0.165406				0.332952	0.0766402	0.0418545	0.148806	0.240387	0.281403	0.148511	0.268348
4930519H02Rik	0	0	0	0.0382997	0.0311786	0.0330811				0.0110984	0	0	0	0	0.0255821	0	0
4930520O04Rik	0.297793	0.516618	1.22697	0.612795	0.717108	0.827029				0.532723	0.638668	0.209272	0.223209	0.420678	0.511641	0.623748	0.309632
4930520P13Rik	0	0	0	0	0	0				0	0	0	0	0	0	0	0
4930521E06Rik	0	0	0	0	0	0				0	0	0	0	0	0	0	0
4930522H14Rik	0	0	0	0	0	0				0	0	0	0	0	0	0	0
4930522O17Rik	0	0	0	0	0	0				0	0	0	0	0	0.0255821	0	0
4930523C07Rik	69.6565	71.4779	65.4897	75.3354	81.7503	79.2955				88.1102	165.057	134.981	99.3527	139.214	116.219	86.1366	151.41
4930523O13Rik	0	0	0	0	0	0				0	0	0	0	0	0	0	0
4930524B15Rik	0.0812163	0.0369013	0	0.0382997	0.155893	0.0992434				0.0110984	0	0	0.0496019	0	0	0.0297023	0
4930524C18Rik	0	0	0	0	0	0				0	0	0	0	0	0	0	0
4930524N10Rik	0	0	0	0	0	0				0	0	0	0	0	0	0	0
4930524O05Rik	0	0	0	0	0	0				0	0	0	0	0	0	0	0
4930524O08Rik	0	0	0	0	0	0				0	0	0	0	0	0	0	0
4930525D18Rik	0.324865	0.258309	0.115029	0.382997	0.124714	0.396974				0.27746	0.306561	0.334836	0.471218	0.360581	0.179074	0.326725	0.165137
4930525G20Rik	0.703875	0.811829	0.2684	0.651094	0.592393	0.330811				0.610412	0.562028	0.251127	0.198408	0.330533	0.281403	0.445534	0.227064
4930525M21Rik	0	0	0	0	0	0				0	0	0	0	0	0	0	0
4930526I15Rik	1.81383	1.95577	3.71926	2.98737	1.93307	2.44801				0.876774	1.2007	1.21378	1.48806	1.29208	1.61167	0.742557	1.13532
4930526L06Rik	0.13536	0.110704	0.191714	0.114899	0	0				0.0332952	0.0510934	0	0.0744029	0.0300484	0.0767462	0.0594046	0
4930527F14Rik	0	0	0	0	0	0				0	0	0	0	0	0	0	0
4930527G23Rik	0	0	0	0	0	0				0	0	0	0	0	0	0	0
4930528A17Rik	0.460226	0.110704	0.191714	0.114899	0.155893	0.264649				0.166476	0.434294	0.125563	0.124005	0.0901453	0.332567	0.207916	0.103211
4930528D03Rik	0.785091	0.738026	0.5368	0.765993	0.779465	0.727785				0.399542	0.664215	0.418545	0.272811	0.360581	0.434895	0.712855	0.206422
4930528P14Rik	0	0	0	0	0	0				0	0	0	0	0	0	0	0
4930529C04Rik	0	0	0	0.0765993	0	0.0330811				0.0110984	0.0255467	0	0	0	0.0255821	0.0297023	0
4930529K09Rik	0	0	0	0	0	0				0	0	0	0	0	0	0	0
4930529L06Rik	0	0	0	0	0	0				0	0	0	0	0	0	0	0
4930529M08Rik	0.0812163	0.184507	0	0	0.0311786	0.0992434				0.0332952	0.0766402	0	0	0	0.0255821	0.0297023	0
4930532M18Rik	0	0	0	0	0	0				0	0	0	0	0	0	0	0
4930533B01Rik	0	0	0	0	0	0				0	0	0	0	0	0	0	0
4930533P14Rik	0	0	0	0	0	0				0	0	0	0	0	0	0	0
4930538K18Rik	4.1691	4.28055	5.55972	5.32365	3.80379	4.13514				8.04634	7.22972	6.78042	5.95223	7.18157	6.34435	4.33653	2.66284
4930539C22Rik	0	0	0	0	0	0				0	0	0	0	0	0	0	0
4930539E08Rik	0.676802	0.258309	1.11194	0.689394	0.530036	0.430055				0.932266	0.740855	0.878943	1.31445	0.751211	0.511641	0.920771	0.970181
4930539J05Rik	0.595586	0.147605	0.345086	0.536195	0.717108	0.363893				0.34405	0.459841	0.209272	0.223209	0.240387	0.204656	0.297023	0.268348
4930539M17Rik	0	0.0369013	0	0	0	0				0	0	0	0	0	0	0.0297023	0
4930539N22Rik	0	0	0	0	0	0				0	0	0	0	0	0	0	0
4930540M03Rik	0.0541442	0	0	0	0	0				0	0	0	0	0	0	0	0
4930542C21Rik	0	0	0	0	0	0				0	0	0	0	0	0	0	0
4930542D17Rik	0	0	0	0	0	0				0	0	0	0	0	0	0	0
4930543E12Rik	0	0	0	0	0	0				0.0110984	0	0	0	0	0	0	0
4930544D05Rik	0.0270721	0	0	0	0	0.0661623				0	0	0	0	0.0300484	0	0	0
4930544G11Rik	0	0.0369013	0	0.0765993	0	0				0	0	0	0	0	0	0	0
4930544M13Rik	0.0270721	0	0	0	0	0				0.055492	0.0255467	0.0837089	0	0.0300484	0.0511641	0	0.0412843
4930545E07Rik	0	0	0	0	0	0				0	0	0	0	0	0	0	0
4930545H06Rik	0	0	0	0	0	0				0	0	0	0	0	0	0	0
4930545L23Rik	0	0	0	0	0	0				0	0	0	0	0	0	0	0
4930546C10Rik	0.0541442	0	0	0	0	0				0	0.0255467	0	0	0	0.0255821	0	0.0206422
4930546K05Rik	0	0	0.153372	0.191498	0.0935358	0.0330811				0.110984	0.0255467	0.0418545	0.173607	0	0.102328	0.0297023	0
4930547E08Rik	0	0	0	0	0	0				0	0	0	0	0	0	0	0
4930547E14Rik	0	0	0	0	0	0				0	0	0	0	0	0	0	0
4930548G14Rik	0	0	0	0	0	0				0	0	0	0	0	0	0	0
4930548H24Rik	0.189505	0.147605	0	0.153199	0.155893	0				0.0998856	0.0255467	0.0418545	0.0496019	0.0600968	0.0767462	0	0.0412843
4930548J01Rik	0	0	0	0.0382997	0	0				0	0	0	0	0	0	0	0
4930548K13Rik	0	0	0	0	0	0				0	0	0	0	0	0	0	0
4930549C01Rik	0	0	0.153372	0	0	0				0	0	0	0.024801	0	0	0	0
4930549G23Rik	0.0541442	0.110704	0.0766858	0.153199	0.0311786	0				0.0332952	0.0255467	0.0418545	0	0.0300484	0.0511641	0	0.0206422
4930550C14Rik	2.54478	1.18084	2.07052	3.52357	3.24257	3.37428				6.64794	9.17127	4.14359	7.11788	5.85944	7.23972	5.82165	6.27522
4930550L24Rik	0	0	0	0	0	0				0	0	0	0	0	0	0	0
4930552N02Rik	0	0	0	0	0	0				0	0	0	0	0	0	0	0
4930552P12Rik	0.324865	0.147605	0.498458	0.229798	0.592393	0.165406				0.0221968	0	0	0.0496019	0	0	0	0
4930553E22Rik	0	0	0	0	0	0				0	0	0	0	0	0	0	0
4930554C24Rik	0	0	0	0	0	0				0	0	0	0	0	0	0	0
4930555B11Rik	0	0	0	0	0	0				0	0	0	0	0	0	0	0
4930555G01Rik	0.351937	0.147605	0.0766858	0.153199	0.280607	0.29773				0.177574	0.255467	0.0418545	0.0744029	0.270436	0.179074	0.0297023	0.0825686
4930556C24Rik	0.622658	0.664224	0	0.0382997	0.21825	0.0992434				0.0887872	0.0255467	0.0837089	0.0496019	0.0600968	0.12791	0.148511	0.0206422
4930556G01Rik	0	0	0	0	0	0				0	0	0	0	0	0	0	0
4930556J02Rik	0	0	0	0	0	0				0	0	0	0	0	0	0	0
4930556M19Rik	11.5327	8.56111	11.9246	8.42593	9.19768	8.36953				2.67471	3.44881	1.79974	2.13288	2.73441	2.96752	2.82172	2.04357
4930556N09Rik	0.0270721	0	0	0.0765993	0.0623572	0.0661623				0	0	0	0	0	0	0.0297023	0
4930557A04Rik	0	0	0	0	0.0311786	0.0992434				0.0221968	0.0255467	0	0	0	0	0.0297023	0
4930557J02Rik	0	0	0	0	0	0				0	0	0	0	0	0	0	0
4930558C23Rik	0	0	0	0	0	0				0	0	0	0	0	0	0	0
4930558G05Rik	0	0	0	0	0	0				0	0	0	0	0	0	0	0
4930558J18Rik	0.541442	0.590421	1.45703	2.22138	0.65475	0.760866				1.10984	1.09851	1.42305	0.744029	1.32213	0.716298	0.475237	0.412843
4930558K02Rik	0.0270721	0	0	0	0.0311786	0				0	0.0255467	0	0	0	0	0	0
4930562C15Rik	0	0	0.0766858	0	0	0				0.0110984	0	0	0	0	0	0	0
4930562F07Rik	0	0	0.191714	0	0	0				0	0.0510934	0	0.024801	0	0	0	0.0206422
4930563D23Rik	0	0	0	0	0.0311786	0.0330811				0.0221968	0	0	0	0	0.0255821	0	0
4930563E18Rik	0.0812163	0.258309	0.0766858	0	0.0935358	0.0661623				0.0776888	0.102187	0	0.0744029	0.150242	0	0	0.0825686
4930563E22Rik	4.03374	2.21408	2.87572	3.52357	3.95968	3.07655				1.57597	1.35398	1.46491	1.61206	1.41228	1.96982	1.42571	1.63073
4930563F08Rik	0	0	0	0	0	0				0	0	0	0	0	0	0	0
4930563M20Rik	0	0.110704	0	0	0.0311786	0.264649				0.0221968	0.102187	0.0418545	0.024801	0.0600968	0.0255821	0.118809	0.0619265
4930564B18Rik	0	0	0	0	0	0				0	0	0	0	0	0	0	0
4930564C03Rik	0	0	0	0	0	0				0	0	0	0	0	0	0	0
4930564D02Rik	0	0	0	0.0765993	0	0				0	0	0	0.024801	0	0	0	0
4930565D16Rik	0	0	0	0.114899	0.0311786	0				0	0	0	0	0	0	0	0
4930565N06Rik	0.108288	0	0	0.0382997	0.0311786	0.0661623				0.0332952	0.0255467	0.0418545	0.024801	0	0.0767462	0	0.0206422
4930567H12Rik	0	0	0	0	0	0				0	0	0	0	0	0	0	0
4930567H17Rik	0	0	0	0	0	0				0	0	0	0	0	0	0	0
4930567J20Rik	0	0	0	0	0	0				0	0	0	0	0	0	0	0
4930567K20Rik	0	0	0	0	0	0				0	0	0	0	0	0	0	0
4930568D16Rik	0	0	0	0	0	0				0	0	0	0	0	0	0	0.0206422
4930568E12Rik	0.0541442	0	0	0.0382997	0	0.0661623				0.0665904	0.0255467	0	0.0744029	0.0300484	0.0255821	0.0594046	0.0206422
4930568G15Rik	0	0	0	0	0	0				0	0	0	0	0	0	0	0.0206422
4930570G19Rik	0.0541442	0	0	0	0.187072	0.0992434				0	0	0	0	0	0	0	0
4930571K23Rik	0	0	0	0	0	0				0	0	0	0	0	0	0	0
4930571O06Rik	0	0	0	0	0	0				0	0	0	0	0	0	0	0
4930572K03Rik	0	0	0	0	0	0				0	0	0	0	0	0	0	0
4930572O03Rik	0	0	0	0	0	0				0	0	0	0	0	0	0	0
4930572O13Rik	0	0	0	0	0	0				0	0	0	0	0	0	0	0
4930573O16Rik	0	0	0	0	0	0				0	0	0	0	0	0	0	0
4930577N17Rik	0.893379	0.664224	0.843544	0.765993	0.717108	0.430055				0.34405	0.383201	0.292981	0.347213	0.210339	0.230239	0.297023	0.268348
4930578C19Rik	0	0.405914	0	0	0.0623572	0				0	0	0.0418545	0	0	0	0	0.0206422
4930578E11Rik	0.0541442	0.0738026	0.0766858	0.0382997	0	0.0661623				0.0221968	0.0255467	0.0418545	0.024801	0	0	0	0.0412843
4930578I06Rik	0	0	0	0	0	0				0.0221968	0	0.0837089	0	0.0901453	0.0255821	0.0297023	0.0412843
4930578M01Rik	1.89505	0.885632	1.15029	0.804293	1.68364	1.09168				0.754691	0.408747	0.334836	0.297612	0.57092	0.409313	0.475237	0.392201
4930578N18Rik	0	0	0	0	0	0				0	0	0	0	0	0	0	0
4930579F01Rik	0.0541442	0.110704	0.0766858	0	0.0623572	0				0	0	0	0	0	0	0	0
4930579G18Rik	0.622658	0.332112	0.613486	0.306397	0.467679	0.529298				0.499428	0.306561	0.292981	0.272811	0.600968	0.383731	0.415832	0.454127
4930579G24Rik	6.38901	6.78984	13.8034	14.6688	7.70111	7.67483				7.02529	6.56551	7.95235	6.34905	8.80419	7.18856	6.77212	7.4931
4930579K19Rik	1.54311	1.07014	1.38034	1.07239	2.33839	1.45557				0.632609	0.613121	0.418545	0.396815	0.450726	0.690716	0.623748	0.227064
4930581F22Rik	12.4261	10.111	12.6148	10.4175	12.9391	8.17104				1.24302	1.27734	0.878943	1.36405	1.32213	1.15119	1.2475	0.371559
4930583K01Rik	0.0812163	0	0.115029	0.0382997	0.0311786	0.0661623				0.055492	0	0.0418545	0.0496019	0.0600968	0.12791	0	0.0206422
4930583P06Rik	0	0	0	0	0	0				0	0	0	0	0	0	0	0
4930584F24Rik	0	0	0	0	0	0				0	0	0	0	0	0	0	0
4930590J08Rik	0.297793	0.0738026	0.421772	0.0382997	0.155893	0.29773				0.221968	0.204374	0.37669	0.124005	0.39063	0.230239	0.207916	0.247706
4930590L20Rik	0.0270721	0	0	0	0	0				0.0221968	0.0255467	0	0	0	0	0.0297023	0
4930591A17Rik	0	0	0	0	0	0				0	0	0	0	0	0	0	0
4930592A05Rik	0	0	0	0	0	0				0.0110984	0	0	0	0	0	0	0
4930592I03Rik	0	0	0	0	0	0				0.0332952	0.0510934	0.0418545	0.024801	0	0.0511641	0	0.0206422
4930593A02Rik	0.0270721	0.0369013	0	0	0.0311786	0				0.0110984	0	0	0.024801	0.0300484	0.0255821	0	0
4930593C16Rik	0	0	0	0	0.0311786	0				0	0	0	0	0	0	0	0
4930594C11Rik	0.189505	0.55352	0.843544	0.995791	0.405322	0.56238				0.155378	0.0766402	0.0418545	0.173607	0.240387	0.230239	0.118809	0.123853
4930595M18Rik	0	0	0	0	0	0				0	0	0	0	0	0	0	0
4930596D02Rik	0	0	0	0	0	0				0	0	0	0	0	0	0	0
4930596I21Rik	0.108288	0	0.2684	0.191498	0.0623572	0.231568				0.0998856	0.0510934	0.0837089	0.0496019	0.0901453	0.0767462	0.148511	0.0825686
4930597G03Rik	0	0	0	0	0	0				0	0	0	0	0	0	0	0
4930598F16Rik	0.108288	0	0	0	0	0.0661623				0	0	0	0	0	0	0	0
4930599N23Rik	0.460226	0.774928	0.383429	0.191498	0.4365	0.56238				0.166476	0.178827	0.167418	0.148806	0.300484	0.12791	0.118809	0.0412843
4931402G19Rik	0.622658	0.258309	0.498458	0.229798	0.873001	0.661623				0.466133	0.510934	0.460399	0.421616	0.510823	0.409313	0.564343	0.28899
4931403E22Rik	0.0812163	0.0369013	0	0.114899	0	0.0661623				0.0110984	0.0255467	0	0	0	0	0	0
4931403G20Rik	0	0	0	0	0	0				0	0	0	0	0	0	0	0
4931406B18Rik	0.243649	0.0369013	0.115029	0.268098	0.187072	0				0.177574	0.22992	0.0837089	0.0496019	0.0600968	0.0255821	0.237618	0.103211
4931406C07Rik	36.8722	29.7056	33.55	33.5505	39.6903	36.7201				18.7341	20.5651	14.4398	15.3518	16.3163	15.6306	19.5144	15.6674
4931406H21Rik	1.21824	1.18084	0.498458	0.689394	0.904179	1.09168				0.477231	0.434294	0.795235	0.446417	0.300484	0.179074	0.742557	0.908255
4931406P16Rik	48.2966	47.3813	48.1203	39.9466	48.015	44.6265				42.4514	47.3892	39.2595	41.1448	41.557	38.6289	42.6525	47.126
4931408C20Rik	0	0	0	0	0	0				0	0	0	0	0	0	0	0
4931408D14Rik	0.13536	0.0369013	0.0383429	0	0.0311786	0				0.0776888	0.15328	0.0418545	0.198408	0.0901453	0.0511641	0.267321	0.227064
4931409K22Rik	0.162433	0	0	0.306397	0.21825	0				0	0	0	0.024801	0	0.0255821	0.0297023	0.0206422
4931412M21	0	0	0.0766858	0	0	0				0.0110984	0	0	0	0	0	0	0
4931414P19Rik	7.36361	8.3397	7.24681	7.96633	8.13761	6.88088				6.50366	6.20785	6.40373	6.69626	5.28852	6.36993	7.87111	6.33714
4931417E11Rik	0	0	0	0	0	0				0	0	0	0	0	0	0	0
4931419H13Rik	0	0	0	0.0765993	0	0				0	0	0	0	0	0	0	0
4931420L22Rik	0.108288	0	0	0.114899	0	0				0.0221968	0.0255467	0.0418545	0.0992039	0	0.0255821	0	0.0825686
4931423N10Rik	0	0	0	0.0382997	0	0.0330811				0.0443936	0.102187	0.125563	0.0744029	0.0901453	0.0767462	0.0297023	0.0825686
4931428F04Rik	21.3599	17.1222	18.9797	15.3965	21.4509	15.1181				9.20057	9.29901	8.32904	8.65554	10.9076	8.82581	9.35622	7.59631
4931428L18Rik	0.487298	0.221408	0.306743	0.229798	0.187072	0.529298				0.255263	0.15328	0.125563	0.223209	0.420678	0.153492	0.178214	0.227064
4931429I11Rik	0	0	0	0	0	0				0	0	0	0	0	0	0	0
4931429L15Rik	0.351937	0.110704	0.153372	0.114899	0.155893	0.198487				0.0776888	0.204374	0.0418545	0.024801	0	0.12791	0	0.0412843
4931429P17Rik	0.0270721	0.0369013	0	0	0	0				0	0	0	0	0	0	0	0
4931430N09Rik	0	0	0	0	0	0				0	0	0	0	0	0	0	0
4931431B13Rik	0	0	0	0	0	0				0	0	0	0	0	0	0	0
4931431C16Rik	0.0270721	0	0	0.0765993	0.0311786	0				0.0110984	0.102187	0	0	0	0.0255821	0	0.0206422
4931431F19Rik	0	0	0	0	0	0				0	0	0	0	0	0	0	0
4931440F15Rik	0.189505	0.332112	0.191714	0.114899	0.155893	0.132325				0.0998856	0.15328	0.167418	0.0992039	0.150242	0.255821	0.267321	0.123853
4931440J10Rik	0	0	0.0383429	0	0.0311786	0.0330811				0.0110984	0.0255467	0	0	0	0	0	0.0206422
4931440L10Rik	0	0	0	0.191498	0	0				0.0110984	0.0255467	0.0418545	0	0	0.0511641	0.0594046	0.0206422
4931440P22Rik	0.433154	0.405914	0.728515	0.536195	0.311786	0.496217				0.21087	0.408747	0.460399	0.272811	0.450726	0.74188	0.326725	0.330274
4932411E22Rik	0.0812163	0.258309	0.191714	0.191498	0.810643	0.165406				0.166476	0.281014	0.209272	0.223209	0.0901453	0.0255821	0.0891069	0.123853
4932411N23Rik	0	0	0	0	0	0				0	0	0	0	0	0	0	0
4932412D23Rik	0	0	0	0	0	0				0	0	0	0	0	0	0	0
4932413F04Rik	0	0	0	0	0	0				0	0	0	0	0	0	0	0
4932414J04Rik	0.0270721	0.0738026	0	0	0	0				0	0	0	0	0	0	0	0
4932414N04Rik	0.189505	0.221408	0.230057	0	0.0935358	0.0661623				0.110984	0.15328	0.0837089	0.0744029	0.180291	0.102328	0.237618	0.0825686
4932415M13Rik	0	0	0	0	0	0.0330811				0	0	0	0.0496019	0	0.0255821	0	0.0206422
4932416H05Rik	12.3178	9.44674	12.193	10.7622	9.88361	10.9499				8.77883	10.0654	7.28267	7.11788	8.08303	8.1351	7.36617	7.1009
4932416K20Rik	0	0	0	0	0	0				0	0	0	0	0	0	0	0.0206422
4932418E24Rik	0.622658	0.221408	2.22389	2.14478	0.810643	0.264649				0.255263	0.357654	0.125563	0.297612	0.210339	0.204656	0.564343	0.536696
4932429P05Rik	0	0	0	0	0	0				0	0	0	0	0	0	0	0
4932435O22Rik	0.920451	0.590421	0.421772	0.153199	0.935358	0.198487				0.122082	0.102187	0.0418545	0.0744029	0.120194	0.12791	0.207916	0.0825686
4932438A13Rik	272.616	215.799	269.167	261.319	292.268	280.429				289.935	321.838	226.014	266.164	250.363	231.748	264.737	235.155
4932438H23Rik	1.13703	0.405914	1.26532	0.842593	0.592393	0.430055				0.310755	0.178827	0.209272	0.24801	0.300484	0.332567	0.148511	0.247706
4932441J04Rik	0.0541442	0.0738026	0.191714	0.229798	0.0623572	0.0992434				0.055492	0.0766402	0.0837089	0.0744029	0	0.0767462	0	0.0825686
4932443I19Rik	0	0	0	0	0	0				0	0	0	0	0	0	0	0
4932702P03Rik	0	0	0.0383429	0	0	0.0330811				0	0	0	0	0	0	0	0.0206422
4933400A11Rik	0	0	0	0	0	0				0	0	0	0	0	0	0	0
4933400B14Rik	0	0	0	0	0	0				0	0	0	0	0	0	0	0
4933400C23Rik	0	0	0	0	0	0				0	0	0	0	0	0	0	0
4933400F21Rik	0	0	0	0	0	0				0	0.0255467	0	0	0.0300484	0	0	0
4933400L20Rik	0	0	0	0	0.0311786	0				0	0	0	0	0	0	0	0
4933401B06Rik	0	0	0	0	0	0				0	0	0	0	0	0	0	0
4933401D09Rik	0.270721	0.0738026	0.575143	0.191498	0.311786	0.396974				0.122082	0.15328	0.0837089	0.0992039	0.150242	0.153492	0.0891069	0.0619265
4933401H06Rik	0	0	0	0	0	0				0	0	0	0	0	0	0	0
4933402C06Rik	0	0	0	0	0	0				0	0	0	0	0	0	0	0
4933402D24Rik	0	0	0	0	0	0				0	0	0	0	0	0	0	0
4933402E13Rik	0	0	0	0.0382997	0	0				0	0	0	0	0	0	0	0
4933402J07Rik	0	0	0	0	0	0				0	0	0	0	0	0	0	0
4933402J10Rik	0	0	0	0	0	0				0	0	0	0	0	0	0	0
4933402J15Rik	0	0	0	0	0	0				0	0	0	0	0	0	0	0
4933402N03Rik	0	0	0	0	0	0				0	0	0	0	0	0	0	0
4933402N22Rik	0	0	0	0	0	0				0	0	0	0	0	0	0	0
4933402P03Rik	0	0	0	0	0	0				0	0.0255467	0	0.024801	0	0.0255821	0.0297023	0.0412843
4933403O08Rik	0	0	0	0	0	0				0	0	0.0418545	0	0	0	0	0
4933404G15Rik	0	0	0	0	0	0				0	0	0	0	0	0	0	0
4933404K08Rik	0.243649	0.0369013	0.153372	0.153199	0.0623572	0.132325				0.0998856	0.178827	0.0837089	0.0992039	0.210339	0.0767462	0.178214	0.103211
4933404O12Rik	11.8847	13.2845	18.0212	18.4221	14.9034	13.1001				9.28936	9.78439	9.24983	6.54745	9.31501	8.05835	7.93051	5.55274
4933405D12Rik	0.730947	0.369013	0.613486	0	0.498857	0.430055				0.377346	0.281014	0.292981	0.372014	0.420678	0.537223	0.267321	0.227064
4933405E24Rik	0	0	0	0	0	0				0	0	0	0	0	0	0	0
4933405L10Rik	0	0.110704	0.115029	0.0765993	0.0311786	0				0	0	0	0	0.0300484	0	0	0.0206422
4933405O20Rik	0	0	0	0	0	0				0	0	0	0	0	0	0	0
4933406C10Rik	0.460226	0.701125	0.728515	0	0.405322	0.430055				0.177574	0.306561	0.125563	0.272811	0.180291	0.358149	0.326725	0.247706
4933406D12Rik	0	0	0	0	0	0				0	0	0	0	0	0	0	0
4933406F09Rik	0	0	0	0	0	0				0	0	0	0	0	0	0	0
4933406G16Rik	0	0	0	0	0	0				0	0	0	0	0	0	0	0
4933406I18Rik	0	0	0	0	0	0				0	0	0	0	0	0	0	0
4933406J08Rik	0	0	0	0	0.0311786	0				0	0	0	0.0496019	0.0901453	0	0.0297023	0.247706
4933406J10Rik	0	0	0	0	0	0				0	0	0	0	0	0	0	0
4933406K04Rik	0	0	0	0	0	0				0	0	0	0	0	0	0	0
4933406M09Rik	0.0541442	0	0.0766858	0	0	0				0	0	0	0.024801	0	0	0.0297023	0
4933407E24Rik	0.0541442	0.184507	0	0.153199	0	0				0.0332952	0.0255467	0	0.0496019	0	0.0255821	0.0297023	0
4933407G14Rik	0.0270721	0	0	0	0.0311786	0.0992434				0	0.0255467	0	0	0	0	0	0
4933407I05Rik	0	0	0	0	0	0				0	0	0	0	0	0	0	0
4933407K13Rik	14.0504	11.4394	10.1609	10.609	14.0304	11.8761				9.0452	9.78439	8.24533	5.70422	8.44361	8.08393	8.46515	5.84173
4933407L21Rik	0.0270721	0.110704	0.191714	0.0382997	0	0				0.0443936	0	0.0418545	0.124005	0.0901453	0.153492	0	0.0619265
4933408B17Rik	1.75969	1.91887	2.18554	1.41709	2.46311	2.24952				1.78684	2.27366	1.79974	1.48806	2.04329	1.89307	1.93065	0.949539
4933408J17Rik	0	0.0738026	0	0	0.0311786	0				0.0332952	0.0510934	0.0418545	0.0496019	0.0901453	0.0767462	0.0594046	0.0825686
4933408N05Rik	0.866307	0.295211	1.03526	0.191498	0.592393	0.727785				0.55492	0.587575	0.251127	0.421616	0.360581	0.306985	0.297023	0.28899
4933409G03Rik	0	0	0	0	0	0				0	0	0	0	0	0	0	0
4933409K07Rik	0	0	0	0	0	0				0	0	0	0	0	0	0	0
4933411E08Rik	1.10996	0.701125	0.613486	0.689394	0.685929	0.628542				0.543822	0.485388	0.418545	0.347213	0.631017	0.486059	0.77226	0.309632
4933411G06Rik	0	0	0	0	0	0				0	0	0	0	0	0	0	0
4933411G11Rik	0.108288	0	0	0	0	0				0.0110984	0	0	0	0	0	0	0
4933411K16Rik	1.32653	1.58676	2.30057	2.14478	1.59011	3.57276				0.521625	0.485388	0.209272	0.570422	0.57092	0.204656	0.38613	0.495412
4933411K20Rik	33.9484	28.783	28.2587	33.742	33.9223	30.8316				26.6473	29.9918	23.3548	21.1552	24.9101	20.2354	26.8212	19.1766
4933412E12Rik	1.00167	1.51295	1.11194	1.14899	1.3095	1.81946				0.355149	0.510934	0.125563	0.421616	0.420678	0.230239	0.237618	0.309632
4933412E24Rik	0	0	0	0	0	0				0	0	0	0	0	0	0	0
4933412O06Rik	0	0	0	0	0	0				0	0	0	0	0	0	0	0
4933413G19Rik	0.189505	0.147605	0.383429	0.268098	0.124714	0.0330811				0.0887872	0.0766402	0.167418	0.0992039	0.180291	0.102328	0.0594046	0.123853
4933413J09Rik	0	0	0	0	0	0				0	0	0	0	0	0	0	0
4933413L06Rik	0	0	0.0766858	0	0	0.0330811				0.0332952	0	0	0	0	0.0255821	0	0.0206422
4933415F23Rik	0.0270721	0	0	0	0	0				0	0	0	0	0	0	0	0
4933416C03Rik	0	0	0	0	0	0				0	0	0	0	0	0	0	0
4933416E03Rik	0	0	0	0	0.0311786	0				0	0	0	0	0	0	0	0
4933416I08Rik	0	0	0	0	0	0				0	0	0	0	0	0	0	0
4933416M06Rik	0.406081	0.0738026	0.115029	0.0382997	0.124714	0.0661623				0.0443936	0.0510934	0	0.0496019	0.0300484	0.0511641	0.0297023	0.0619265
4933416M07Rik	0	0	0	0	0	0				0	0	0	0	0	0	0	0
4933417A18Rik	0	0	0	0	0	0				0	0	0	0	0	0	0	0
4933417D19Rik	0.189505	0.0738026	0	0.114899	0.21825	0.29773				0.155378	0.15328	0.251127	0.148806	0.0901453	0.204656	0.118809	0.227064
4933417E11Rik	0.0270721	0	0	0.0382997	0.249429	0				0.0110984	0.0255467	0	0	0	0	0.0297023	0
4933417G07Rik	0	0	0	0	0	0				0	0	0	0.024801	0	0	0	0
4933417O13Rik	0	0	0	0	0	0				0	0	0	0	0	0	0	0
4933421I07Rik	0	0	0	0	0	0				0.0110984	0.0255467	0.0418545	0	0	0	0	0
4933421O10Rik	10.1791	8.63491	8.24372	8.15783	10.8813	11.4792				5.80446	6.59105	4.52028	4.51378	5.01809	6.06295	6.26718	5.03669
4933422A05Rik	0.162433	0.221408	0.230057	0.0382997	0.0935358	0.0330811				0.055492	0	0.0837089	0	0	0.102328	0.0594046	0.0206422
4933422H20Rik	0	0	0	0	0	0				0	0	0	0	0.0300484	0	0	0
4933424G05Rik	0	0.0369013	0	0.0382997	0	0.0330811				0.0221968	0.0255467	0	0	0.0600968	0	0.0297023	0.0206422
4933424G06Rik	0.0812163	0	0	0	0.187072	0				0.0443936	0.0255467	0	0.024801	0.0300484	0	0	0.0206422
4933425B07Rik	0	0	0	0	0	0				0	0	0	0	0.0300484	0	0	0.0206422
4933425L06Rik	0	0	0	0	0	0				0	0	0	0	0	0	0	0
4933426M11Rik	141.993	154.1	201.377	131.866	191.904	248.803				125.379	155.861	135.315	155.676	150.573	124.61	117.265	170.401
4933427D06Rik	0	0	0	0	0.0311786	0				0	0	0	0.024801	0	0	0	0.0412843
4933427D14Rik	53.6298	46.6064	56.2874	49.2534	54.3755	49.3902				30.9645	36.5063	26.0335	28.5955	31.0701	30.4938	31.0389	22.9954
4933427E11Rik	0.108288	0.184507	0.306743	0.268098	0.124714	0.0330811				0.055492	0.0255467	0	0.0496019	0.0300484	0	0	0
4933427E13Rik	0	0	0	0	0	0				0	0	0	0	0	0	0	0
4933427G17Rik	0.51437	0.258309	0.306743	0.421296	0.342965	0.29773				0.355149	0.587575	0.37669	0.322413	0.180291	0.281403	0.504939	0.165137
4933427I22Rik	0	0	0	0	0	0				0	0	0	0	0	0	0	0
4933428C19Rik	0	0	0	0	0	0				0	0	0	0	0	0	0	0
4933428G20Rik	0	0	0.0766858	0	0	0				0.0110984	0	0	0.0744029	0	0.0255821	0.0297023	0
4933429K18Rik	0	0	0	0	0	0				0	0	0	0	0	0	0	0
4933429O19Rik	0	0	0	0	0	0				0	0	0	0	0	0	0	0
4933430H16Rik	0	0	0	0	0	0				0	0	0	0	0	0	0	0
4933430I17Rik	0.866307	1.07014	1.38034	1.07239	0.904179	0.893191				0.665904	0.613121	0.544108	0.719228	0.631017	0.74188	0.65345	0.454127
4933430M04Rik	0.162433	0.442816	0.575143	0.459596	0.374143	0.198487				0.155378	0.0510934	0.125563	0.0992039	0.330533	0.255821	0.118809	0.0825686
4933430N04Rik	0	0	0	0	0	0				0	0	0	0	0	0	0	0
4933431E20Rik	82.3804	62.9536	70.0908	79.7016	84.1198	97.7879				20.6652	19.3389	18.9601	15.5254	18.9606	18.7772	22.5737	14.305
4933431G14Rik	0	0	0	0	0	0				0	0	0	0	0	0	0	0
4933432G23Rik	0	0	0	0	0	0				0	0	0	0	0	0	0	0
4933432I03Rik	0	0	0	0	0	0				0	0	0	0	0	0	0	0
4933432I09Rik	0	0.479717	0.0383429	0.0765993	0.280607	0.0992434				0.0776888	0.22992	0.0837089	0.0992039	0.120194	0.12791	0.0594046	0.0825686
4933432K03Rik	0	0	0	0	0	0				0.0110984	0	0	0	0	0	0	0
4933433C11Rik	0.0541442	0.0738026	0.728515	0.229798	0.0935358	0.231568				0.399542	0.562028	0.209272	1.11604	0.691114	0.460477	0.178214	1.03211
4933433F19Rik	0	0	0	0	0	0				0	0	0	0	0	0	0	0
4933433G08Rik	0	0	0	0	0	0				0	0	0	0	0	0	0	0
4933433G15Rik	0.541442	0.627322	0.383429	0.536195	0.4365	0.330811				0.332952	0.281014	0.251127	0.148806	0.180291	0.306985	0.118809	0.185779
4933433G19Rik	0.0270721	0.0369013	0	0	0	0.0330811				0.0110984	0.0255467	0	0	0.0300484	0	0	0.0206422
4933433H22Rik	0.0541442	0.0369013	0	0.153199	0	0.165406				0.055492	0.0510934	0.0837089	0.024801	0.180291	0.0767462	0.148511	0.0619265
4933434E20Rik	48.9464	44.503	44.171	47.8363	53.7519	48.6624				41.2084	40.2361	36.8738	33.6797	39.6038	36.1219	41.999	30.5917
4933434I20Rik	0	0	0	0	0	0				0	0	0	0	0	0	0	0
4933436E23Rik	0	0	0	0	0	0				0	0	0	0	0	0	0	0
4933436H12Rik	0	0	0	0	0	0				0	0	0	0	0	0	0	0
4933436I01Rik	0	0	0	0	0	0				0	0	0	0	0	0	0	0
4933438B17Rik	0	0	0	0	0	0				0	0	0	0	0	0	0	0
4933438K21Rik	0.108288	0.405914	0.0766858	0	0.155893	0.132325				0.188673	0.22992	0.167418	0.0744029	0.180291	0.102328	0.0891069	0.0412843
4933439C10Rik	34.8689	29.4473	46.97	32.0951	45.9572	36.0254				14.3391	20.9739	14.3561	17.3855	19.9221	21.7448	17.5541	14.5114
4933439K11Rik	2.65307	2.95211	0.881886	1.07239	1.59011	1.35633				1.4206	1.40507	0.837089	0.868034	1.14184	1.48376	1.2772	0.846328
4933440J02Rik	0	0	0	0	0	0				0	0	0	0	0	0	0	0
4933440M02Rik	0.595586	0.664224	0.383429	1.11069	0.748286	0.132325				0.0110984	0.15328	0.125563	0.0496019	0.180291	0.102328	0.0594046	0.185779
5031410I06Rik	0.13536	0	0	0.0382997	0	0				0.0443936	0	0	0.0744029	0.0300484	0	0.0297023	0.0206422
5031414D18Rik	0	0	0	0.0382997	0	0				0	0.0510934	0	0	0	0	0	0
5031425E22Rik	37.7656	26.2737	33.8568	31.5589	32.8622	37.1832				27.0579	30.7327	23.3966	25.421	25.421	29.6752	23.1381	29.3944
5031425F14Rik	0	0	0	0	0	0				0	0	0	0	0	0	0	0
5031426D15Rik	1.00167	0.701125	0.651829	0.229798	0.685929	0.396974				0.55492	0.715308	0.544108	0.496019	0.420678	0.537223	0.534641	0.206422
5031434C07Rik	0.0812163	0.147605	0.115029	0.0765993	0.187072	0.231568				0.0110984	0.0510934	0	0	0	0	0	0
5031434O11Rik	5.22491	3.32112	3.52755	3.06397	3.36729	3.60585				1.55378	1.76272	1.33934	1.24005	1.29208	1.4326	0.77226	0.990823
5031439G07Rik	42.2866	44.9827	47.8903	52.4705	44.5854	49.754				72.1285	73.4979	74.8358	78.4702	86.239	75.3648	77.9388	97.7406
5033403H07Rik	0	0	0	0	0	0				0	0	0	0	0	0	0	0
5033404E19Rik	0	0	0	0	0	0				0	0	0	0	0	0	0	0
5033406O09Rik	0.758019	0.110704	0.2684	0.497896	1.27832	1.29016				0.0221968	0.0255467	0	0	0	0.0255821	0.0297023	0.0619265
5133400J02Rik	0	0	0.115029	0	0	0				0.0221968	0	0.0418545	0.024801	0	0	0.0297023	0
5330411J11Rik	0	0	0	0	0	0				0.0110984	0	0	0	0.0300484	0	0.0594046	0.123853
5330413P13Rik	0	0	0	0	0	0				0	0.0255467	0	0	0	0	0	0
5330417C22Rik	0.0812163	0.442816	0	0.114899	0.187072	0				0.0887872	0.127734	0.125563	0.0744029	0.120194	0.0511641	0.415832	0.123853
5330426P16Rik	14.7001	7.12195	8.78052	11.0303	11.5361	11.9092				7.97975	8.2005	6.1526	4.19136	6.7609	5.96062	6.65331	4.25228
5330434G04Rik	0	0	0	0	0	0				0	0	0	0	0	0	0	0
5330439B14Rik	0	0	0	0	0	0				0	0	0	0	0	0	0	0
5430401F13Rik	0	0	0	0	0	0				0.0221968	0	0	0	0	0	0	0
5430402E10Rik	0	0	0	0	0	0				0	0	0	0	0	0	0	0
5430402O13Rik	1.05581	0.774928	0.996915	1.03409	1.06007	1.12476				0.521625	0.383201	0.334836	0.396815	0.39063	0.383731	0.415832	0.28899
5430403N17Rik	0	0	0.0383429	0	0	0				0.0221968	0.0510934	0.0837089	0.0496019	0	0.0255821	0	0
5430405H02Rik	9.71888	6.19942	9.43235	8.69402	8.97943	11.1814				5.84886	5.54364	4.31101	4.78659	4.62746	5.67922	6.26718	4.97476
5430416N02Rik	17.2179	19.8529	19.3248	16.737	16.5558	16.706				9.16728	9.12018	10.9659	10.7884	9.70564	10.591	11.0493	9.90823
5430416O09Rik	0.13536	0.479717	0.115029	0	0	0.0992434				0.0332952	0.127734	0	0	0.0901453	0.0511641	0.0297023	0.0619265
5430417L22Rik	13.4007	16.458	15.6822	17.5412	15.6828	16.9375				62.8946	68.8484	57.2987	58.0095	60.7279	63.29	79.1566	66.1581
5430419D17Rik	0	0	0	0	0.0623572	0				0	0	0	0	0	0	0	0.0206422
5430421F17Rik	11.1808	7.52787	9.08727	9.49832	7.29579	8.20412				3.37391	2.78459	2.34385	2.25689	0.871404	1.04886	1.96035	0.990823
5430421N21Rik	0.162433	0.184507	0.153372	0.229798	0.21825	0.0992434				0	0.0255467	0.0418545	0	0.150242	0.12791	0.0297023	0.0206422
5430425K12Rik	0	0	0	0	0	0				0.0443936	0	0	0	0	0	0.0297023	0
5430427M07Rik	0	0	0	0	0	0				0	0	0	0.024801	0	0	0.0297023	0
5430427O19Rik	0.108288	0.516618	0	0.114899	0.0311786	0.231568				0.0887872	0.0766402	0	0.0992039	0.0600968	0.0255821	0.0594046	0.0619265
5430428K19Rik	0	0	0	0	0	0				0	0	0	0	0	0	0	0
5430434I15Rik	0	0	0	0	0	0				0	0	0	0	0	0	0	0
5430435G22Rik	72.6344	70.3339	81.4403	73.612	74.9222	66.46				109.008	105.636	92.2472	105.131	100.151	95.8048	107.79	90.3094
5430437J10Rik	0.0270721	0	0.0383429	0	0	0.0992434				0.055492	0.0255467	0.0837089	0.0496019	0.0600968	0.0767462	0.118809	0.123853
5430440P10Rik	0.351937	0.147605	0.115029	0.344697	0.0935358	0.132325				0.0221968	0.0510934	0.0418545	0.0992039	0.0300484	0.0511641	0.0297023	0
5530400C23Rik	0	0	0	0	0	0				0	0	0	0	0	0	0	0
5530401A14Rik	0	0	0	0	0	0				0	0	0.0418545	0	0	0	0	0
5530601H04Rik	27.4782	22.1408	22.1622	24.5501	29.5261	25.2078				15.2159	14.0762	11.217	9.32516	12.1997	11.4352	14.5541	9.2064
5730403I07Rik	0.0270721	0	0	0	0	0.0330811				0.0998856	0.0255467	0.125563	0.173607	0.0901453	0.0255821	0.148511	0.185779
5730405O15Rik	0.568514	0.405914	0.2684	0.306397	0.530036	0.330811				0.221968	0.0510934	0.167418	0.0992039	0.210339	0.332567	0.0297023	0.0825686
5730408K05Rik	4.43982	4.02224	3.56589	3.44697	3.86615	3.67201				2.7746	2.65686	2.67868	2.35609	3.06494	6.19086	3.05934	2.31192
5730409E04Rik	19.14	15.0557	20.5901	14.9369	18.6136	17.6984				7.38044	6.43777	5.23181	5.62982	6.15993	5.57689	9.56414	5.9243
5730412P04Rik	0	0	0	0	0	0				0	0	0	0	0	0	0	0
5730416F02Rik	0.0812163	0	0.115029	0	0	0				0	0.0255467	0	0.024801	0	0.0255821	0	0
5730420D15Rik	0.0812163	0.0738026	0	0	0.155893	0.0661623				0.0110984	0	0	0	0	0	0.0594046	0
5730422E09Rik	0.595586	0.405914	0.421772	0.229798	0.311786	0.396974				0.577117	0.357654	0.251127	0.396815	0.270436	0.230239	0.0891069	0.0825686
5730435O14Rik	0	0	0	0	0	0				0	0	0	0.024801	0	0	0	0.0412843
5730455P16Rik	29.5898	27.7867	33.3583	31.9419	28.7155	32.7173				24.1057	23.784	19.1693	21.0064	18.0591	19.0842	24.8608	17.7729
5730457N03Rik	0	0	0	0	0	0				0	0	0	0	0	0	0	0
5730460C07Rik	0	0	0	0	0	0				0	0.0255467	0.0418545	0	0	0	0	0
5730480H06Rik	6.9846	4.83407	7.74526	5.97475	6.39161	6.25234				5.71568	5.49254	3.09723	3.42253	4.26688	3.96522	4.36624	2.14678
5730488B01Rik	0	0	0	0	0	0				0	0	0	0	0	0	0	0
5730507C01Rik	18.1654	15.6462	19.2481	12.6772	18.3018	16.4744				8.11293	10.372	7.40824	5.53061	7.24167	7.18856	9.68295	7.51374
5730508B09Rik	14.8355	15.6093	15.989	17.8859	15.2463	12.4385				41.2195	45.371	35.1577	31.1252	44.1111	44.0779	44.5237	33.8325
5730522E02Rik	0.64973	0.221408	0.2684	0.114899	0.0935358	0.264649				0.0110984	0	0	0.0496019	0	0	0	0.0412843
5730559C18Rik	32.2429	41.9568	19.6699	38.9125	23.0722	27.4904				34.9933	34.0793	39.0083	35.8374	48.4982	49.4245	42.5634	49.7889
5830403L16Rik	0	0	0.2684	0.0382997	0.155893	0.496217				0.0887872	0.102187	0	0.173607	0.180291	0.0511641	0.118809	0.144495
5830411N06Rik	0	0	0	0	0.0311786	0				0	0	0.0418545	0	0	0.0767462	0	0
5830415F09Rik	6.17244	4.68647	4.98458	4.05976	5.64333	5.06142				4.32838	4.18966	4.43657	4.19136	5.58901	4.65594	3.9504	5.51146
5830416I19Rik	0.297793	0.147605	0	0.191498	0.0311786	0.198487				1.06545	0.868588	0.585962	0.496019	0.931501	0.639552	0.594046	0.495412
5830416P10Rik	0.297793	0.110704	0.0383429	0.229798	0.374143	0.264649				1.3873	2.06928	1.88345	1.33925	0.751211	0.972118	0.861366	0.908255
5830417I10Rik	19.6273	3.65323	4.21772	5.20875	17.4912	5.16066				19.6109	20.5651	4.89697	5.87783	21.4846	36.0195	6.17808	5.63531
5830418K08Rik	88.9318	79.0795	101.225	85.6381	91.0103	77.2445				93.0934	97.7928	77.2215	72.4932	82.5731	77.6927	80.8793	55.0939
5830418P13Rik	0.379009	0.0369013	0	0.191498	0.249429	0				0.510526	1.43062	1.13007	1.01684	1.56252	1.38143	2.34648	1.23853
5830428M24Rik	0.162433	0.147605	0.230057	0.306397	0.21825	0.165406				0.310755	0.357654	0.209272	0.421616	0.300484	0.306985	0.267321	0.123853
5830432E09Rik	0	0.184507	0.191714	0.153199	0.0935358	0.165406				0.144279	0.178827	0	0.272811	0.120194	0.153492	0.0594046	0.0825686
5830444B04Rik	0.216577	0.295211	1.57206	1.14899	0.561215	0.430055				0.255263	2.86123	0.585962	1.63686	1.32213	0.818626	1.42571	0.722475
5830454E08Rik	0.839235	1.10704	0.766858	0.804293	0.935358	0.661623				0.754691	0.536481	0.460399	0.471218	0.661065	1.04886	0.38613	0.495412
5830473C10Rik	0	0	0	0	0.0311786	0				0.0110984	0	0	0	0	0	0	0
5930403L14Rik	0.0541442	0	0.0383429	0.0765993	0.124714	0.0992434				0.0776888	0.15328	0	0.0496019	0.0901453	0.102328	0.118809	0.103211
5930412G12Rik	1.6514	1.51295	1.45703	1.49369	0.717108	0.132325				15.7819	15.8901	12.0122	12.2517	12.8908	13.0724	12.0294	10.6101
5930430L01Rik	40.7164	23.4323	30.1759	28.2652	27.1254	29.8392				35.5482	31.8568	18.6671	21.3288	20.9738	21.1564	30.029	16.7614
5930438M14Rik	0.108288	0	0.191714	0.153199	0.342965	0.0992434				0.288558	0.357654	0.209272	0.124005	0.240387	0.12791	0.118809	0.0619265
6030407O03Rik	0	0	0	0.114899	0	0.0330811				0.0110984	0	0	0	0	0	0	0
6030408B16Rik	0.13536	0.184507	0.115029	0.114899	0.0935358	0				0.399542	0.459841	0.334836	0.644825	0.39063	0.255821	0.118809	0.57798
6030419C18Rik	15.8101	17.3067	10.3526	8.42593	15.9946	10.2221				0.410641	0.383201	0.251127	0.223209	0.270436	0.511641	0.267321	0.495412
6030440G07Rik	0.324865	0.184507	0.115029	0.153199	0.280607	0.231568				0.366247	0.204374	0.209272	0.223209	0.39063	0.281403	0.207916	0.268348
6030443J06Rik	9.20451	8.19209	7.59189	11.2601	9.01061	8.33645				9.0341	10.4997	5.52479	6.29944	8.26332	5.78155	7.63349	5.20182
6030458C11Rik	55.0376	49.5585	48.8488	47.0703	56.9945	48.3316				55.2145	52.5241	45.5376	39.4335	48.2878	44.8198	54.0285	37.9609
6030466F02Rik	0	0	0	0	0	0.0661623				0	0	0	0	0	0	0	0
6030468B19Rik	0	0	0	0.0382997	0	0				0	0.0255467	0	0	0	0.0255821	0.0297023	0
6030469F06Rik	0	0	0	0	0	0				0	0	0	0	0.0300484	0	0	0
6030498E09Rik	0	0	0	0	0	0				0	0	0	0	0	0	0	0
6230400D17Rik	1.10996	0.332112	0.728515	0.153199	0.592393	0.628542				0.466133	0.434294	0.37669	0.148806	0.210339	0.434895	0.207916	0.165137
6330403A02Rik	0	0	0.0383429	0	0.0623572	0.165406				0.0110984	0	0	0.024801	0	0.0255821	0.0297023	0
6330403K07Rik	1.8409	1.66056	0.996915	1.34049	0.841822	1.38941				0.0332952	0	0.0837089	0.124005	0.0300484	0.12791	0.0891069	0.103211
6330407A03Rik	0	0	0	0.0765993	0	0				0.0110984	0	0	0	0	0	0	0
6330408A02Rik	18.1654	13.838	19.8616	19.2647	20.2973	17.8969				6.2484	6.69324	5.69221	6.44825	6.61065	7.36763	7.63349	6.00687
6330409D20Rik	0	0	0	0	0	0				0	0	0	0	0	0	0	0
6330410L21Rik	0.0812163	0	0	0	0	0				0.0221968	0.0255467	0.0418545	0.0496019	0	0.0511641	0.0297023	0
6330415B21Rik	0.108288	0	0.115029	0.0765993	0.0935358	0.0661623				0.0332952	0.0510934	0	0.0496019	0.0600968	0.0511641	0.0891069	0
6330416G13Rik	12.8322	11.1073	12.8832	11.9878	11.0372	15.5151				5.26064	4.11302	3.80876	5.92743	5.04814	5.37223	7.00974	6.64677
6330418K02Rik	4.38568	3.69013	3.71926	5.66835	4.9574	3.17579				3.57368	3.09115	2.97167	2.10808	3.69596	3.19776	2.99993	2.06422
6330419J24Rik	0.243649	0.590421	0.421772	0.536195	0.685929	0.760866				0.199771	0.178827	0.0418545	0.198408	0.270436	0.230239	0.148511	0.185779
6330549D23Rik	0.974595	0.221408	0.460115	0.536195	0.810643	0.231568				0.865675	0.715308	0.334836	0.198408	0.901453	1.53492	0.178214	0.103211
6430411K18Rik	0	0	0	0	0	0				0	0	0	0	0	0	0	0
6430503K07Rik	0	0	0	0	0	0				0	0	0	0	0	0	0	0
6430531B16Rik	0.108288	0.147605	0.345086	0.459596	0.342965	0.29773				0.122082	0.102187	0.167418	0.173607	0.150242	0.153492	0	0.123853
6430548M08Rik	6.68681	9.04082	9.12561	17.771	5.17565	6.58315				86.8672	74.9541	94.5492	83.9017	81.0706	85.1371	113.997	84.9218
6430550D23Rik	2.24698	1.62366	1.99383	1.03409	2.49429	1.15784				1.08764	1.12406	0.460399	0.76883	0.901453	1.02328	1.15839	0.598622
6430562O15Rik	0.0270721	0	0.0383429	0	0	0				0.0110984	0	0	0.0496019	0	0.0255821	0	0
6430571L13Rik	1.59725	0.664224	1.72543	1.80008	1.99543	2.91114				0.355149	0.408747	0.334836	0.471218	0.360581	0.306985	0.415832	0.433485
6430573F11Rik	1.40775	1.80816	3.68092	2.68098	3.42965	4.00282				5.527	7.383	5.44108	6.42345	6.7609	6.75366	9.17801	7.38989
6430584L05Rik	0	0	0	0	0	0				0	0	0	0	0	0	0	0
6430706D22Rik	0	0	0	0	0	0				0	0	0	0	0	0	0	0
6430710C18Rik	0.13536	0.0369013	0.115029	0	0	0				0.0332952	0.102187	0.125563	0.0744029	0.0600968	0.0767462	0.0891069	0.0206422
6530402F18Rik	0.893379	1.84507	1.76377	1.64689	1.43422	1.0586				4.56144	4.13857	4.81326	4.68738	4.95799	4.78385	4.87118	3.4266
6530411M01Rik	0	0	0	0	0	0				0	0	0	0	0	0	0	0
6720416L17Rik	0.487298	0.0369013	1.03526	0	0.0311786	0.0330811				0.0221968	0.0255467	0	0	0	0	0	0
6720468P15Rik	0.0541442	0	0	0.0765993	0.0623572	0				0.366247	0.945229	1.42305	0.446417	0.811307	0.486059	0.683153	0.454127
6720483E21Rik	0.541442	0.110704	0.881886	0.229798	0.280607	0.29773				0.0221968	0.0510934	0	0.0496019	0.0600968	0	0.0594046	0
6720489N17Rik	5.87465	4.79717	8.81886	6.97054	6.89047	7.64175				2.13089	2.75905	2.26014	1.63686	1.53247	2.04656	3.29695	1.67201
6820408C15Rik	0.595586	0.295211	0.460115	0.268098	0.592393	0.198487				0.055492	0	0.0837089	0.0992039	0.0901453	0.0767462	0.0891069	0.185779
6820431F20Rik	575.093	457.761	551.179	471.852	603.43	532.739				513.889	571.097	426.288	365.12	466.832	393.503	513.701	341.194
7420426K07Rik	0	0	0	0	0	0				0	0	0	0	0	0	0	0
7420461P10Rik	0	0	0.0383429	0.0382997	0.155893	0				0.0221968	0.0510934	0	0	0.0300484	0.0511641	0	0.0412843
7420700N18Rik	0.0270721	0	0	0	0	0				0.0221968	0	0	0	0	0.0511641	0	0
7420701I03Rik	0	0	0	0	0	0				0	0	0	0	0	0	0	0
7530416G11Rik	0.0541442	0	0.0766858	0.0382997	0.187072	0.132325				0.110984	0.0510934	0.209272	0.0992039	0.120194	0.0767462	0.0594046	0.165137
7630403G23Rik	0	0	0	0	0	0				0	0	0	0	0	0	0	0
8030411F24Rik	0	0	0	0	0	0				0	0	0	0	0	0	0	0
8030423F21Rik	0.379009	0.184507	0.460115	0	0.21825	0.198487				0.432838	0.332107	0.334836	0.347213	0.330533	0.562805	0.38613	0.392201
8030423J24Rik	0	0	0	0	0	0				0	0	0	0	0	0	0	0
8030442B05Rik	0.243649	0.184507	0	0.421296	0.124714	0.0992434				0.0776888	0.102187	0.125563	0.0496019	0.150242	0.0511641	0.178214	0.0619265
8030443G20Rik	0	0	0	0	0	0				0	0	0	0	0	0	0	0
8030462N17Rik	26.4224	26.163	28.1053	25.7374	29.9003	26.7626				30.0101	34.9224	30.5537	26.661	30.5292	26.3495	29.3162	29.8692
8430408G22Rik	0.297793	2.10338	1.15029	0.804293	0.904179	1.5879				1.26522	2.65686	2.13458	3.10012	2.52407	1.63725	1.45541	2.66284
8430419L09Rik	15.5935	12.9524	16.5641	19.4562	16.0258	13.7287				109.963	86.6545	108.026	46.849	126.294	99.5654	91.3048	47.477
8430422H06Rik	0	0	0	0	0	0				0	0	0	0	0	0	0	0
8430423G03Rik	0	0	0	0	0	0				0	0	0	0	0	0	0.0594046	0
8430426J06Rik	0	0	0	0	0	0				0.0110984	0.0510934	0	0	0	0	0	0.0412843
8430427H17Rik	22.9842	19.7422	17.0242	24.2437	24.9741	26.2003				2.45275	2.86123	2.59498	2.18248	4.98804	3.73498	3.8613	5.42889
8430429K09Rik	7.79676	5.38759	8.47378	6.97054	8.54293	7.34402				4.78341	4.13857	4.43657	3.47213	3.12504	4.68152	3.68308	2.82798
8430431K14Rik	0	0	0	0	0	0				0	0	0	0	0	0	0	0
8430436N08Rik	5.68514	5.35069	1.80212	1.76178	1.80836	3.83741				0	0	0	0	0	0	0.0297023	0
8430437L04Rik	0	0	0	0	0	0				0	0	0	0	0	0	0	0
9030025P20Rik	3.65473	2.10338	3.56589	2.98737	4.33382	3.10963				2.00881	2.50358	1.8416	1.38885	1.74281	1.53492	2.10886	0.805044
9030204H09Rik	0	0	0	0	0	0				0	0	0	0	0	0	0	0
9030404E10Rik	0	0	0	0.229798	0.0623572	0.0992434				0.144279	0.0510934	0.125563	0.0992039	0.0901453	0.153492	0.118809	0.123853
9030612E09Rik	0	0	0	0	0	0				0	0	0	0	0	0	0	0
9030617O03Rik	8.8255	12.8048	11.963	12.6006	8.51176	7.5425				7.43593	6.74433	6.94784	5.2578	9.13472	7.08623	4.24743	3.90137
9030619P08Rik	0	0	0.115029	0	0	0.0330811				0	0.0255467	0	0.124005	0	0	0.0297023	0
9030624G23Rik	8.79843	8.3028	8.74218	6.12795	10.1642	8.66726				4.80561	4.49622	3.39021	4.68738	5.58901	5.32107	4.81177	5.63531
9030624J02Rik	67.0305	60.1122	61.1569	60.3603	66.9404	62.6557				53.2834	50.4803	51.3136	58.2327	51.533	51.2153	46.5435	51.5228
9030625G05Rik	0.0812163	0.184507	0.0383429	0.114899	0.0935358	0.0992434				0.0110984	0.0255467	0.0837089	0.148806	0	0.0255821	0.0297023	0.0206422
9130008F23Rik	45.3999	39.7796	36.119	36.7294	39.8151	46.1482				11.1761	14.3828	11.7192	12.3013	13.3415	11.8957	10.9304	12.3027
9130011E15Rik	30.5373	28.5616	32.3997	26.58	29.0896	32.9157				28.7338	28.7912	25.6568	31.646	26.0219	25.3007	28.6033	29.9724
9130015A21Rik	0	0	0.0383429	0	0	0				0.27746	0.434294	0.209272	0.496019	0.210339	0.230239	0.326725	0.412843
9130015L21Rik	0	0	0	0	0	0				0	0	0	0	0	0	0	0
9130019O22Rik	2.76135	3.69013	1.80212	2.37458	2.80607	4.10206				2.59703	2.37584	3.09723	3.02572	3.06494	2.32797	1.87124	3.69495
9130019P16Rik	0	0	0	0	0	0				0	0	0	0	0	0	0	0
9130023H24Rik	10.6664	11.956	12.8832	10.1494	12.1285	10.1559				13.4069	11.0106	11.7611	8.92835	11.7489	11.0259	9.83146	7.94723
9130024F11Rik	0.0270721	0	0	0.114899	0.0935358	0				0.199771	0.0255467	0.0418545	0.322413	0.180291	0.204656	0.267321	0.227064
9130204L05Rik	0	0	0	0	0	0				0.233066	0.306561	0.209272	0	0.0901453	0.0511641	0.178214	0.0206422
9130209A04Rik	0	0.0369013	0	0	0	0				0.0221968	0	0	0	0	0	0	0
9130221F21Rik	0.406081	0.55352	0.613486	0.497896	0.498857	0.529298				0.477231	0.357654	0.502253	0.322413	0.450726	0.409313	0.356427	0.350917
9130221H12Rik	9.28573	8.63491	8.97224	11.2218	10.1954	9.19656				6.9476	6.43777	6.82228	9.74678	7.18157	6.44668	7.12855	7.61696
9130227L01Rik	0	0	0	0.0765993	0.0935358	0.0330811				0	0	0	0	0	0.0511641	0.0297023	0
9130230L23Rik	0	0	0.0383429	0	0	0				0.0443936	0.127734	0.0418545	0.0744029	0.0901453	0.0255821	0.148511	0.103211
9130401M01Rik	35.681	40.2962	38.0361	37.0358	33.2987	32.3534				20.1547	18.8279	25.9079	17.5839	19.0207	22.6913	20.8213	16.7821
9130409I23Rik	0	0	0	0	0	0				0.0221968	0	0	0.024801	0	0.0511641	0	0
9230009I02Rik	0	0	0	0	0	0				0	0	0	0	0	0	0	0
9230102K24Rik	0	0	0	0	0	0				0	0	0	0	0	0	0	0
9230102O04Rik	0.0541442	0.0738026	0	0.344697	0.0623572	0.0330811				0.632609	0.613121	0.502253	0.644825	1.77286	1.48376	1.93065	1.15596
9230104L09Rik	0.0541442	0	0	0	0	0				0.110984	0.102187	0.0418545	0.024801	0.0300484	0.0255821	0.0594046	0.0412843
9230105E05Rik	0	0	0.0383429	0	0	0.0330811				0.0110984	0.0255467	0	0	0	0	0.0297023	0
9230110C19Rik	11.4515	10.0003	11.1578	9.68982	9.91479	10.8175				10.0441	11.2916	8.32904	10.218	8.20322	9.84909	8.94039	7.59631
9230110F15Rik	0	0	0	0	0	0				0	0	0	0	0	0	0	0
9230112D13Rik	0.216577	0.590421	0	0.0382997	0.187072	0.0661623				0.122082	0	0	0.0992039	0.0300484	0	0.0594046	0.0412843
9230112J17Rik	0.270721	0.258309	0.651829	0.382997	0.280607	0.198487				0.710298	0.638668	0.544108	0.868034	0.540872	0.665134	1.12869	0.825686
9230114K14Rik	6.93046	6.53153	8.16704	9.11532	5.98629	6.21926				15.2048	14.6383	12.1796	10.962	11.7189	11.691	14.465	10.4036
9230116L04Rik	0.243649	0.0738026	0.498458	0.191498	0.187072	0.0992434				0.221968	0.22992	0.125563	0.148806	0.240387	0.204656	0.415832	0.103211
9230116N13Rik	1.62433	0.959434	1.0736	0.497896	1.09125	1.42249				1.84233	1.5328	1.46491	1.83527	1.62261	1.61167	1.21779	1.61009
9330020H09Rik	3.27572	2.8045	2.79903	2.33628	2.83725	2.18336				2.44165	2.78459	1.9253	2.4553	2.25363	2.48146	2.46529	2.41513
9330102E08Rik	2.86964	1.91887	3.52755	1.68519	2.05779	4.23439				0.799085	0.664215	0.627817	0.76883	0.600968	0.562805	0.920771	0.722475
9330111N05Rik	0.0812163	0	0	0.0765993	0.0311786	0.0661623				0.055492	0.127734	0.167418	0.0744029	0.120194	0	0.0297023	0
9330117O12Rik	0	0	0	0	0	0				0	0	0	0	0	0	0	0
9330133O14Rik	7.49897	6.78984	7.82195	6.05135	7.4205	5.92153				3.89554	3.29553	4.35286	5.67942	4.86784	4.68152	4.03951	5.61467
9330151L19Rik	27.397	23.8013	28.4888	26.8481	32.9246	27.4574				13.762	15.328	10.338	7.26668	14.0326	16.9865	12.4453	5.63531
9330158H04Rik	0.487298	0.258309	0.306743	0.153199	0.249429	0.430055				0.355149	0.281014	0.334836	0.372014	0.120194	0.332567	0.475237	0.330274
9330159F19Rik	0.108288	0	0.153372	0.0382997	0.124714	0.0661623				0.155378	0.102187	0.0837089	0.0992039	0.240387	0.281403	0.148511	0.103211
9330159M07Rik	2.65307	2.47239	4.2944	3.63847	3.6479	3.5066				1.95332	1.916	1.21378	1.38885	1.05169	1.76516	2.19797	1.73394
9330162012Rik	22.2533	14.7605	24.1177	17.8859	16.93	21.0727				19.3223	20.5907	15.821	21.1552	17.9389	18.0865	19.158	18.7431
9330162B11Rik	0	0	0	0	0	0				0	0	0	0	0	0	0	0
9330175E14Rik	0.812163	0.295211	0.881886	0.153199	0.65475	0.529298				0.566018	0.562028	0.37669	0.24801	0.751211	0.537223	0.415832	0.412843
9330175M20Rik	0	0	0	0	0	0				0.0110984	0.0255467	0	0.024801	0	0	0	0
9330178D15Rik	0	0	0	0	0	0				0	0.0255467	0	0	0	0	0	0
9330179D12Rik	0.162433	0.627322	0.383429	0.153199	0.249429	0.29773				0.110984	0.204374	0.125563	0.173607	0.150242	0.0511641	0.118809	0.0206422
9330182L06Rik	0.730947	1.29155	1.53372	2.98737	1.68364	1.91871				0.388444	0.459841	0.167418	0.446417	0.300484	0.486059	0.742557	0.495412
9330182O14Rik	0	0	0	0	0	0				0	0	0	0	0	0	0	0
9330188P03Rik	0	0.0738026	0.191714	0	0.0623572	0				0.0665904	0	0.167418	0	0.0600968	0.0511641	0.0297023	0.0412843
9430007A20Rik	0	0	0	0	0	0				0	0	0	0	0	0.0511641	0.237618	0
9430008C03Rik	48.053	39.6689	54.4852	43.2403	52.8789	45.0234				39.1108	32.6487	31.3908	34.6221	39.1531	41.1615	34.7814	28.5275
9430014N10Rik	0	0	0	0	0	0				0	0	0	0	0	0	0	0
9430015G10Rik	47.8905	49.4109	59.0097	52.3556	54.4066	39.3004				41.7522	45.09	36.1204	36.0854	49.1292	44.9733	37.9298	31.3348
9430016H08Rik	13.157	15.4248	13.4967	14.0177	13.3444	11.9092				9.6889	11.1639	10.6729	9.15156	10.1564	11.2817	9.47503	9.37154
9430018G01Rik	0.379009	0.295211	1.22697	0.574495	0.342965	0.330811				0.221968	0.102187	0.209272	0.223209	0.150242	0.102328	0.297023	0.123853
9430019J16Rik	0	0	0	0	0	0				0	0	0	0	0	0	0	0
9430020K01Rik	26.3141	22.2515	31.2878	18.0774	35.8866	32.6511				7.28055	8.12386	4.98068	6.52265	5.13828	6.11411	5.85135	7.18347
9430021M05Rik	0	0	0	0	0	0				0	0	0	0	0	0	0	0
9430037G07Rik	5.8205	3.69013	4.06435	5.82155	7.35815	7.57558				3.40721	3.37217	3.18094	2.5545	2.61421	2.45588	3.17814	2.04357
9430038I01Rik	4.95419	4.53886	5.52138	5.40025	5.51861	5.55763				3.39611	3.57654	3.47392	3.37293	4.02649	4.60477	3.77219	3.50917
9430041J12Rik	0	0	0	0	0.0311786	0				0	0	0	0.0496019	0	0	0	0
9430060I03Rik	0.13536	0.221408	0.115029	0.268098	0.187072	0.231568				0.255263	0.0766402	0.167418	0.124005	0.180291	0.153492	0.148511	0.165137
9430069I07Rik	0.0270721	0	0	0.0765993	0	0				0	0	0	0	0	0	0	0
9430076C15Rik	6.17244	6.49463	4.37109	4.82576	3.99086	4.20131				1.22082	0.996322	0.920798	0.24801	0.691114	0.716298	0.920771	0.639907
9430083A17Rik	1.78676	2.14028	2.18554	0.919192	1.87072	0.827029				1.4206	1.22624	1.17192	1.41365	1.17189	1.63725	1.66333	1.25917
9430091E24Rik	5.65807	3.28422	3.41252	4.97896	5.51861	5.98769				3.84005	3.39771	2.76239	1.76087	2.19353	3.60707	2.6435	2.37385
9530002B09Rik	0	0	0	0	0	0				0	0	0	0	0	0	0	0
9530003J23Rik	0	0	0	0	0	0				0	0	0	0	0	0	0	0
9530026F06Rik	0.243649	0.0738026	0.383429	0.459596	0.342965	0.264649				0.288558	0.383201	0.334836	0.297612	0.240387	0.281403	0.594046	0.144495
9530026P05Rik	0.758019	0.627322	0.460115	0.689394	0.623572	0.529298				0.543822	0.459841	0.292981	0.843233	0.240387	0.434895	0.564343	0.454127
9530027J09Rik	0.622658	0.0369013	0.115029	0.306397	0.779465	0.231568				0.110984	0.15328	0.0837089	0.0992039	0.120194	0.0511641	0.178214	0.123853
9530036O11Rik	0.0812163	0	0.0766858	0	0.0311786	0.0992434				0.0332952	0.0255467	0	0.024801	0	0	0	0
9530051G07Rik	0.595586	0.258309	0.0383429	0.727694	0.935358	0.463136				0.055492	0.15328	0.125563	0	0.120194	0.102328	0.267321	0.0206422
9530052E02Rik	0.108288	0	0.191714	0.114899	0.280607	0.330811				0.055492	0.15328	0.167418	0.0744029	0	0.153492	0.0594046	0.123853
9530053A07Rik	0.64973	0.184507	0.575143	0.497896	1.15361	0.396974				9.05629	13.5142	0.418545	1.09124	12.0194	7.57229	0.65345	0.57798
9530059O14Rik	0.0812163	0.258309	0	0.114899	0.0311786	0.0330811				0.0998856	0.0510934	0.167418	0.0992039	0.180291	0.255821	0.356427	0.144495
9530068E07Rik	193.295	181.628	187.612	183.226	173.384	182.542				115.246	112.457	106.101	103.866	101.353	104.349	103.958	100.754
9530077C05Rik	1.43482	0.996336	1.76377	3.17887	1.24714	1.224				1.4095	1.55835	1.29749	0.942437	1.56252	1.25352	1.2772	0.701833
9530080O11Rik	0.297793	0.332112	0.5368	0.268098	0.561215	0.463136				0.122082	0.15328	0.0837089	0.0992039	0.330533	0.102328	0.445534	0
9530082P21Rik	32.1346	18.1923	24.7312	18.154	34.2653	27.9867				21.3644	24.2438	14.6072	21.7256	25.0604	25.0193	20.257	16.2041
9530091C08Rik	1.94919	1.69746	1.68709	1.68519	2.89961	2.58033				1.3651	1.50726	1.00451	1.16565	1.08174	1.20236	2.6435	2.29128
9630001P10Rik	0.51437	0.516618	0.306743	0.689394	0.405322	0.661623				0.27746	0.459841	0.502253	0.322413	0.39063	0.434895	0.356427	0.330274
9630013A20Rik	0	0	0	0	0	0				0	0	0	0	0	0	0	0
9630028B13Rik	0.243649	0	0.2684	0.191498	0.155893	0				0.055492	0	0	0.0744029	0	0.0255821	0.0594046	0.0619265
9630028H03Rik	0	0.0369013	0	0	0	0				0	0	0	0	0	0	0	0
9630033F20Rik	11.4244	14.9081	12.4998	12.2176	12.0038	11.9423				21.7196	21.0505	22.434	18.4023	22.5063	20.3377	22.2173	18.227
9830107B12Rik	0.189505	0.258309	0.383429	0.114899	0.187072	0.0661623				0.177574	0.178827	0.209272	0.223209	0.240387	0.102328	0.267321	0.144495
9830132P13Rik	0.487298	0.147605	0.0383429	0.191498	0.187072	0.595461				0.532723	0.485388	0.544108	0.496019	0.480775	0.460477	0.504939	0.454127
9830147E19Rik	19.167	10.5907	21.0886	15.3582	17.5535	16.5737				6.2373	6.02903	6.11075	4.21616	3.96639	4.75826	5.85135	4.62384
9830166K06Rik	0.108288	0.147605	0.383429	0.153199	0.280607	0.463136				0.233066	0.15328	0.251127	0.124005	0.150242	0.306985	0.0891069	0.227064
9930012K11Rik	8.41942	6.45773	7.55355	5.09386	5.51861	5.85536				3.65137	4.21521	3.80876	4.29057	3.12504	4.52803	3.98011	3.52981
9930014A18Rik	6.4973	4.90788	11.4645	9.46002	6.95283	8.86575				1.16533	0.817495	0.962652	1.51286	1.83295	1.61167	1.78214	1.48624
9930021J03Rik	87.7677	70.2232	82.2838	81.8081	84.2446	87.8966				107.654	123.11	90.8242	101.932	97.8677	88.8465	101.938	99.0204
9930104L06Rik	29.1837	26.3844	27.7603	22.0989	29.4326	28.8468				19.9105	20.5396	17.7881	16.5174	19.1108	19.5191	18.7124	15.2133
9930111H07Rik	0.0541442	0	0	0.114899	0	0				0	0	0	0	0	0	0	0
9930111J21Rik1	0.324865	1.14394	0.498458	0.536195	0.249429	0.694704				0.299657	1.40507	0.334836	1.09124	0.96155	0.588387	0.475237	0.516054
9930111J21Rik2	0	0	0	0	0	0				0.0110984	0.0255467	0	0	0	0	0	0
A130010J15Rik	19.3295	16.9377	19.3248	18.6519	17.0235	17.4999				19.9549	30.8604	27.6658	22.6433	27.0736	26.5542	21.4154	27.2476
A130077B15Rik	65.0001	49.374	63.9176	61.5859	66.8469	63.3835				57.8116	73.7023	53.8667	46.1794	56.5812	56.6898	67.9291	48.1788
A1bg	0	0.110704	0	0	0	0				0	0	0	0	0	0	0	0
A1cf	0	0	0	0	0	0				0	0	0	0	0	0	0	0
A230001M10Rik	0.0812163	0	0.153372	0	0.124714	0.0330811				0.0110984	0	0	0	0	0	0.0297023	0
A230009B12Rik	0	0	0	0	0	0				0	0	0	0	0	0	0	0
A230020J21Rik	0	0	0	0	0.0311786	0				0.0110984	0	0	0	0	0.0255821	0	0.0206422
A230028O05Rik	0.64973	0.184507	1.03526	0.842593	0.841822	0.430055				0.133181	0.178827	0.125563	0.297612	0.180291	0.204656	0.0594046	0.247706
A230046K03Rik	77.0201	62.806	70.2442	61.8923	73.6438	69.6358				66.4794	73.2935	59.8937	53.1237	59.7964	56.2038	66.6222	46.2797
A230050P20Rik	17.1637	7.15886	22.2772	11.5665	20.1725	14.0595				4.8722	5.36481	2.17643	5.40661	7.36186	5.01408	2.52469	4.33485
A230056J06Rik	0.13536	0	0.115029	0	0.187072	0.0661623				0.0221968	0.0255467	0	0.024801	0.0300484	0.0255821	0.0594046	0.0206422
A230056P14Rik	2.65307	1.62366	1.22697	1.68519	3.89732	2.2826				0.887872	0.868588	0.962652	0.421616	0.871404	1.15119	0.65345	0.598622
A230057D06Rik	0	0	0	0	0	0				0	0	0	0	0	0	0	0
A230065H16Rik	0.0812163	0.147605	0.153372	0	0	0.0992434				0	0.0255467	0	0.024801	0.0600968	0	0	0.0206422
A230070E04Rik	0	0.0738026	0	0	0	0				0	0	0	0	0	0	0	0
A230072C01Rik	13.1841	11.9929	11.8863	13.4815	13.9368	12.0415				10.0108	10.6019	9.20798	6.82026	9.73569	10.9747	10.2473	6.50228
A230072E10Rik	0.920451	1.14394	1.53372	0.765993	0.748286	1.35633				1.54268	2.09483	1.04636	0.992039	1.29208	1.96982	1.60392	1.27981
A230073K19Rik	0.108288	0	0	0.114899	0.0935358	0.0992434				0.055492	0.15328	0.125563	0.0744029	0.0300484	0	0.0297023	0
A230077H06Rik	0.351937	0.147605	0.421772	0.421296	0.155893	0.496217				0.177574	0.306561	0.251127	0.173607	0.270436	0.153492	0.38613	0.123853
A230103J11Rik	0.189505	0.184507	0.460115	0.804293	0.4365	0.529298				0.288558	0.22992	0.167418	0.173607	0.180291	0.409313	0.0594046	0.103211
A230108P19Rik	0	0	0	0	0	0				0	0	0	0	0	0	0	0
A2m	0	0	0	0	0	0				0	0	0	0	0	0	0	0
A330009N23Rik	0.351937	0.405914	0.191714	0.0765993	0.187072	0.430055				0.0443936	0.0255467	0	0	0.0300484	0	0.178214	0.0619265
A330021E22Rik	4.54811	4.39126	5.44469	4.05976	4.45854	4.06898				0.721396	0.945229	0.837089	0.620024	0.631017	0.74188	0.712855	0.639907
A330023F24Rik	7.25532	5.94111	5.67475	12.0261	7.38933	8.03872				1.18753	0.996322	0.669671	0.892835	0.751211	1.07445	1.42571	0.639907
A330032B11Rik	2.08455	1.36535	2.03217	2.25968	1.99543	1.68714				3.20744	3.93419	2.63683	2.5793	2.61421	2.9931	3.35636	2.62155
A330033J07Rik	0.13536	0.258309	0.0383429	0.0765993	0.311786	0.0992434				0	0.0255467	0	0	0.0300484	0.102328	0	0.0206422
A330035P11Rik	2.68014	1.80816	2.53063	1.91498	2.55664	1.85254				1.22082	0.970775	1.00451	0.967238	1.35218	1.07445	1.39601	1.05275
A330040F15Rik	0	0	0	0	0.0311786	0				0.0221968	0	0	0	0	0	0.0594046	0
A330041J22Rik	0.0270721	0	0	0.153199	0.0311786	0				0	0	0	0	0	0	0.0594046	0.0206422
A330048O09Rik	1.86797	1.69746	0.575143	0.306397	0.405322	0.529298				0.0110984	0.0255467	0	0.024801	0	0	0	0.0412843
A330049N07Rik	1.75969	1.21774	0.881886	1.07239	1.24714	1.12476				0.499428	0.919682	0.292981	0.570422	1.05169	0.793044	0.356427	0.371559
A330050F15Rik	0	0	0	0.0382997	0	0				0	0	0	0	0	0	0.0297023	0.0206422
A330069E16Rik	3.51937	3.69013	3.29749	3.37037	3.67907	2.9773				3.00767	3.21889	2.67868	2.77771	3.03489	2.9931	2.94053	2.4977
A330070K13Rik	0	0	0	0	0	0				0	0	0	0	0	0	0	0
A330074K22Rik	0.812163	1.25464	0.651829	1.76178	1.62129	1.48865				0.499428	0.383201	0.209272	0.272811	0.360581	0.306985	0.534641	0.330274
A330076C08Rik	0	0	0	0	0	0				0.0110984	0.0255467	0.0418545	0.0496019	0	0	0.118809	0.0619265
A330076H08Rik	0	0	0	0	0	0				0	0	0	0	0	0	0	0
A330093E20Rik	0	0	0	0	0	0				0	0	0	0	0	0	0	0
A330102I10Rik	0.0541442	0.0738026	0	0.114899	0.0623572	0.165406				0.266362	0.332107	0.167418	0.198408	0.270436	0.204656	0.148511	0.165137
A3galt2	1.40775	2.17718	1.18863	1.30219	1.37186	2.74574				0.954462	2.42694	1.46491	2.82731	1.35218	1.714	0.950473	2.93119
A430005L14Rik	21.7118	24.6132	27.1851	20.8733	22.0433	21.4697				15.6709	15.6857	17.537	15.3518	16.9473	17.6516	14.6432	16.1834
A430033K04Rik	17.4886	16.2366	14.1485	15.971	16.587	15.2835				11.0096	10.8318	9.20798	7.6883	9.25491	9.23512	11.9403	7.41053
A430035B10Rik	0.406081	0.332112	0.383429	0.268098	0.4365	0.29773				0.477231	0.613121	0.460399	0.471218	0.540872	0.665134	0.594046	0.454127
A430078G23Rik	9.28573	7.23266	6.67166	6.74074	8.60529	8.20412				4.77231	4.36849	4.52028	4.48897	4.08659	4.73268	3.9504	4.35549
A430088P11Rik	0.0541442	0.0369013	0.230057	0	0.124714	0.132325				0.110984	0.15328	0	0.0992039	0.150242	0.102328	0.148511	0.0825686
A430089I19Rik	0	0	0	0	0	0				0	0	0	0	0	0	0	0
A430090L17Rik	0.0812163	0	0	0	0	0.0661623				0.055492	0.0255467	0	0.0496019	0.0600968	0.102328	0	0.0619265
A430093F15Rik	0.379009	0.184507	0.191714	0	0.0935358	0.0330811				0.177574	0.102187	0.167418	0.0992039	0.0600968	0.179074	0.118809	0.0825686
A430105I19Rik	11.4244	10.4431	12.6148	16.4689	13.1574	17.4999				59.3875	47.9256	39.4687	57.439	41.3166	39.294	48.5929	38.3944
A430107P09Rik	4.22325	2.43549	4.06435	3.25547	4.86386	4.06898				3.74016	2.70795	2.30199	2.25689	3.57576	2.63495	3.41576	2.33256
A4galt	0.162433	1.14394	0.0766858	0.114899	0.280607	0.0661623				0.443936	0.306561	0.502253	0.223209	0.510823	0.511641	0.891069	0.330274
A4gnt	0	0	0	0	0	0				0.0221968	0.0255467	0	0	0	0.0767462	0	0
A530006G24Rik	0	0	0	0.0765993	0.0623572	0				0	0	0	0	0	0	0	0
A530013C23Rik	0.595586	0.55352	1.8788	1.22559	0.65475	1.15784				1.47609	1.89046	1.42305	2.6537	1.62261	1.76516	1.99005	3.48852
A530016L24Rik	0.162433	0.0369013	0.460115	0.0765993	0.0311786	0.0992434				0	0	0	0	0	0	0	0
A530032D15Rik	0	0	0.153372	0	0.0623572	0				0.0332952	0.0510934	0.0837089	0	0.0300484	0.0255821	0	0.0412843
A530046M15Rik	0	0	0	0	0	0				0	0	0	0	0	0	0	0
A530050N04Rik	0.0270721	0	0.345086	0.153199	0.155893	0.0661623				0.0665904	0.0255467	0.0418545	0.024801	0.0300484	0.0255821	0.0594046	0.0412843
A530053G22Rik	0	0	0	0	0	0				0	0	0	0	0	0	0	0
A530054K11Rik	21.2787	16.9008	17.216	15.588	20.0167	20.4772				17.3357	17.0397	14.0212	10.0444	12.41	11.077	14.5541	9.24769
A530058N18Rik	0	0	0	0	0	0				0	0	0	0	0	0	0	0
A530064D06Rik	0.379009	0.55352	1.41869	0.421296	0.405322	0.661623				0.48833	0.536481	0.334836	0.173607	0.330533	0.486059	0.267321	0.247706
A530065N20Rik	1.13703	0.332112	1.26532	0.306397	0.65475	1.65406				0.432838	0.22992	0.209272	0.52082	0.270436	0.12791	0.178214	0.165137
A530072M11Rik	1.59725	0.84873	0.690172	1.22559	1.3095	1.62098				1.80904	1.43062	1.00451	0.76883	1.41228	1.50934	1.66333	0.908255
A530088E08Rik	0	0	0	0	0	0.132325				0	0.0255467	0	0	0	0	0	0
A530099J19Rik	0	0	0	0	0	0				0	0	0	0	0	0	0	0
A630001G21Rik	2.27406	3.09971	1.95549	1.72348	1.43422	1.62098				0.0221968	0.0255467	0.0837089	0.0496019	0.0300484	0	0.0594046	0.0825686
A630007B06Rik	39.5523	41.4402	29.9458	43.2403	41.7793	46.2474				37.2684	43.4039	35.7856	31.4972	30.3489	29.3682	37.1576	28.6926
A630010A05Rik	0.0270721	0	0	0	0.0935358	0.0330811				0	0.0255467	0	0	0.0600968	0	0.0297023	0.0206422
A630012P03Rik	0	0	0	0	0	0				0	0	0	0	0	0	0	0
A630019I02Rik	0	0	0	0	0	0.0330811				0	0	0	0	0	0	0	0
A630020A06	1.13703	0.811829	1.76377	0.995791	1.746	0.992434				1.29851	1.27734	0.962652	1.09124	1.32213	1.12561	0.475237	0.76376
A630023A22Rik	0.0270721	0.0738026	0	0	0.21825	0.0661623				0.055492	0.0255467	0.0837089	0.24801	0.0600968	0.204656	0.237618	0.268348
A630023P12Rik	0.0541442	0	0	0.0382997	0	0				0	0	0.0418545	0	0	0	0	0
A630033H20Rik	0.0541442	0.0738026	0.0383429	0.0765993	0.187072	0.132325				0.0776888	0.0255467	0	0.0496019	0.0901453	0	0.178214	0.0206422
A630066F11Rik	0.730947	0.922533	0.766858	1.45539	1.37186	0.793948				0.643707	0.587575	0.334836	0.496019	0.781259	1.07445	0.415832	0.557338
A630072M18Rik	10.9642	6.64224	11.1961	6.89394	11.5361	10.189				4.68352	5.0327	3.72505	3.22413	4.17673	4.65594	4.12862	3.98394
A630073D07Rik	0	0	0	0	0	0				0	0	0	0	0	0	0	0
A630075F10Rik	1.21824	0.811829	1.49537	0.880892	1.80836	1.65406				1.57597	1.5328	1.67418	1.16565	1.50242	0.895372	2.28708	1.5688
A630076J17Rik	0	0	0	0	0	0				0	0	0	0	0	0	0	0
A630077J23Rik	0	0	0	0	0	0				0	0	0	0	0	0	0	0
A630089N07Rik	33.813	26.1261	29.9841	36.0017	36.136	31.1624				30.9312	39.1887	27.1635	23.3377	26.5027	27.7821	36.6526	24.6674
A630095E13Rik	0	0	0	0	0	0				0	0	0	0	0	0	0	0
A630095N17Rik	0.13536	0	0.2684	0.268098	0.0311786	0.132325				0.310755	0.281014	0.292981	0.322413	0.180291	0.281403	0.178214	0.28899
A730006G06Rik	0	0	0	0.0382997	0	0				0.0110984	0	0	0	0	0	0	0
A730008H23Rik	0.0270721	0	0	0	0	0				0	0	0	0.024801	0	0	0	0
A730017C20Rik	3.92545	2.65689	9.85412	10.6473	7.85701	6.58315				0.0332952	0.0255467	0.0837089	0	0.0300484	0.0255821	0	0.0412843
A730017L22Rik	21.0892	15.2771	19.6699	17.4646	22.0433	18.0954				17.7907	18.4958	13.3934	14.0373	16.2261	13.712	19.3956	14.2018
A730018C14Rik	0	0	0	0	0	0				0	0	0	0	0	0	0	0
A730020E08Rik	0.487298	0.664224	0.651829	0.497896	0.4365	0.529298				0.399542	0.408747	0.460399	0.372014	0.240387	0.230239	0.237618	0.495412
A730020M07Rik	0	0	0	0	0	0				0.0221968	0.0510934	0	0.024801	0	0	0.0297023	0
A730036I17Rik	0.0541442	0.110704	0	0	0	0.0330811				0.377346	0.485388	0.962652	1.31445	0.661065	0.793044	0.950473	1.63073
A730043L09Rik	0	0	0	0	0	0.0330811				0	0	0	0	0.0300484	0	0	0
A730046J19Rik	0	0	0	0	0	0				0.0110984	0.0510934	0	0.024801	0	0	0.0297023	0
A730056A06Rik	1.00167	1.18084	0.421772	0.957492	0.4365	0.661623				1.64256	1.12406	1.8416	1.48806	0.450726	1.35585	1.75244	1.25917
A730082K24Rik	0.108288	0.0738026	0.460115	0.153199	0.124714	0.132325				1.02105	1.1496	0.711526	1.33925	0.600968	0.486059	0.356427	0.536696
A730085K08Rik	0	0	0	0	0.124714	0				1.19863	1.1496	1.00451	1.38885	0.691114	0.895372	1.06928	0.701833
A730090H04Rik	3.4923	4.28055	1.64874	3.33207	8.04408	4.66444				0.76579	0.894135	0.669671	0.744029	0.600968	0.895372	0.415832	0.309632
A730090N16Rik	0.189505	0.110704	0	0	0.124714	0				0.310755	0.204374	0.209272	0	0.0901453	0.0767462	0	0.0412843
A730098P11Rik	0.893379	0.84873	0.460115	0.957492	0.592393	0.496217				0.643707	0.562028	0.544108	0.471218	0.691114	0.818626	1.18809	0.805044
A830009L08Rik	0.0541442	0	0	0.153199	0.124714	0.0661623				0.0221968	0	0	0.024801	0.0300484	0.0255821	0	0
A830010M20Rik	13.6443	11.6239	15.4138	16.3157	18.5513	14.8534				11.9419	11.1384	9.20798	8.70514	11.5386	10.4631	11.9997	9.30961
A830018L16Rik	1.21824	0.84873	2.53063	0.421296	2.1825	1.52173				0.255263	0.22992	0.334836	0.24801	0.0600968	0.281403	0.415832	0.206422
A830019L24Rik	0	0	0	0	0	0				0	0	0	0	0	0	0	0
A830052D11Rik	0.13536	0.295211	0.115029	0.114899	0	0.165406				0.155378	0.255467	0.0837089	0.0744029	0.120194	0.153492	0.148511	0.103211
A830080D01Rik	38.7943	31.0709	36.0423	31.3291	36.2919	31.9895				29.5106	33.7983	27.7495	23.6601	26.9835	26.3495	36.6823	19.672
A830082K12Rik	0.622658	0.221408	0.5368	0.536195	1.02889	0.56238				0.188673	0.281014	0.37669	0.124005	0.210339	0.0767462	0.297023	0.185779
A830082N09Rik	2.21991	2.50929	2.26223	2.79588	2.49429	2.64649				1.06545	0.715308	0.669671	0.496019	1.02165	0.767462	1.03958	0.681191
A930001A20Rik	0	0	0	0	0	0				0	0	0	0	0	0	0	0
A930001C03Rik	4.43982	2.6938	4.25606	4.48106	3.9285	3.63893				2.87449	3.16779	2.55312	1.83527	3.30533	3.7094	1.69303	0.990823
A930003A15Rik	0	0	0	0	0	0				0	0	0	0	0	0	0	0
A930003O13Rik	0.0541442	0.0738026	0.383429	0.0382997	0.374143	0.165406				0.221968	0.204374	0.125563	0.347213	0.240387	0.179074	0.148511	0.144495
A930004D18Rik	5.73928	5.97801	6.28823	8.61742	8.41822	8.00564				3.74016	4.41958	2.88796	5.0842	6.12988	4.96292	6.38599	5.5321
A930005H10Rik	5.84757	5.27689	4.52446	3.44697	4.61443	5.02833				2.40835	2.22256	2.09272	1.71127	2.34378	2.66053	2.34648	1.85779
A930006I01Rik	0	0	0	0	0	0				0.0110984	0	0	0.024801	0	0.102328	0.0891069	0.0206422
A930006K02Rik	1.13703	0.627322	1.38034	0.497896	0.530036	0.793948				0.21087	0.255467	0.125563	0.148806	0.330533	0.204656	0.118809	0.103211
A930007I19Rik	1.57018	1.40225	1.45703	0.957492	1.65247	0.992434				0.710298	0.510934	0.37669	0.372014	0.420678	0.460477	0.564343	0.330274
A930009A15Rik	0.0541442	0.0369013	0.0766858	0.114899	0.249429	0.330811				0.0332952	0.0766402	0	0.024801	0.0300484	0.0255821	0.0297023	0
A930011G23Rik	0.189505	0.0369013	0.306743	0.153199	0.249429	0.198487				0.0221968	0	0	0	0	0	0.0297023	0
A930011O12Rik	0	0	0	0	0	0				0.0110984	0	0	0	0	0	0	0
A930012L18Rik	9.69181	6.75294	3.71926	7.27694	10.8813	6.78164				6.19291	6.46332	4.05988	2.43049	5.16833	5.88387	4.33653	2.35321
A930013F10Rik	25.0146	18.0078	14.532	17.6944	26.2212	16.4413				31.697	29.3276	20.718	12.7229	30.7395	26.6821	28.6627	16.1834
A930015D03Rik	1.46189	0.774928	1.76377	0.842593	2.96197	0.893191				1.02105	0.791948	0.75338	1.09124	2.10339	1.17677	1.09898	0.722475
A930016O22Rik	0.433154	0.885632	0.651829	0.651094	0.779465	1.09168				0.976659	1.07296	0.544108	0.570422	0.871404	0.895372	0.891069	0.619265
A930017M01Rik	0	0	0	0	0	0.0330811				0.0887872	0.102187	0	0.0744029	0	0.0255821	0.118809	0.0825686
A930018P22Rik	0.162433	0.147605	0	0.382997	0	0.198487				0.0332952	0.0255467	0	0	0	0	0	0.0206422
A930019D19Rik	0	0	0	0	0	0				0.0110984	0	0	0	0	0	0	0
A930024E05Rik	9.09622	3.54253	8.74218	7.92803	10.0707	7.90639				6.31499	4.77724	2.76239	2.18248	4.92794	7.08623	5.1385	2.4977
A930041C12Rik	0	0	0	0.0382997	0.0623572	0.0330811				0	0	0	0	0	0	0	0
AA387883	0	0	0	0	0	0				0	0	0	0	0	0	0	0
AA388235	3.11329	3.13661	1.0736	2.33628	2.71254	2.2826				2.84119	2.65686	1.9253	2.15768	1.95315	2.55821	1.81184	2.04357
AA413626	1.27239	1.07014	1.26532	0.459596	0.717108	0.529298				0.632609	0.613121	0.251127	0.198408	0.540872	0.716298	0.504939	0.185779
AA414768	0.351937	0.258309	0.345086	0.268098	0.21825	0.56238				0.144279	0.15328	0.0418545	0.0496019	0.120194	0.204656	0.0594046	0.123853
AA415398	9.74595	6.78984	8.66549	7.50673	10.0083	11.8431				6.11522	6.92316	5.06439	6.22504	5.52891	6.26761	5.61373	6.46099
AA465934	0.785091	0.885632	0.5368	0.344697	0.623572	0.628542				0.543822	0.434294	0.37669	0.496019	0.360581	0.537223	0.504939	0.268348
AA467197	0.162433	0.0369013	0.0766858	0.306397	0.405322	0.529298				0.0332952	0.0510934	0.0837089	0.024801	0.0600968	0.102328	0.0594046	0.123853
AA474331	2.27406	1.99267	2.9524	1.34049	1.49657	2.01795				0.998856	1.17515	0.878943	1.01684	1.14184	1.10003	0.831664	0.701833
AA536875	0.162433	0.0369013	0.0383429	0	0.311786	0.231568				0.055492	0.0510934	0.0418545	0.0496019	0.0300484	0.0511641	0	0
AA543186	0.785091	0.664224	1.30366	0.612795	1.40304	0.959353				0.643707	0.843042	0.795235	0.421616	0.751211	0.9977	0.980176	0.639907
AA543401	0	0	0	0	0	0				0	0	0	0	0	0	0	0
AA545190	0	0	0	0	0	0				0	0	0	0	0	0	0	0
AA619741	0.0270721	0	0	0	0	0				0	0	0	0	0	0	0	0
AA792892	0.108288	0	0	0.0765993	0.124714	0.0661623				0.221968	0.204374	0.0837089	0.0992039	0.120194	0.204656	0.237618	0.0825686
AA986860	3.9796	4.13295	5.75143	6.47264	4.20911	4.43287				23.6951	30.7838	39.8873	37.7719	39.5738	31.1845	25.7222	41.016
AA987161	24.798	12.6572	23.1208	17.8476	20.7026	21.3373				17.1914	15.609	15.1095	12.0781	11.8992	11.7677	17.3164	10.6514
AB041803	0.541442	0.590421	0.996915	0.612795	1.24714	1.68714				0.255263	0.383201	0.292981	0.24801	0.300484	0.434895	0.534641	0.970181
AB124611	0	0.184507	0	0.153199	0.0935358	0.0330811				0.0332952	0.0510934	0	0.0744029	0.120194	0.12791	0.0594046	0.227064
AF067061	0	0	0	0	0	0				0	0	0	0	0	0	0	0
AF067063	0	0	0	0	0	0				0	0	0	0	0	0	0	0.0412843
AF251705	0	0.0369013	0.115029	0	0	0				0.0110984	0	0	0.0496019	0	0.0255821	0	0.0206422
AF357355	0	0	0	0	0	0				0	0	0	0	0	0	0	0
AF357359	0	0	0	0	0	0				0	0	0	0	0	0	0	0
AF357399	1.6514	0.959434	1.38034	0.689394	1.3095	0.727785				1.03215	1.5839	1.29749	0.843233	1.05169	2.04656	0.920771	0.557338
AF357425	0	0	0	0	0	0				0	0	0	0	0	0	0	0
AF357426	0	0	0	0	0	0				0	0	0	0	0	0	0	0
AF366264	0.568514	0.516618	0.460115	0.382997	0.498857	1.09168				0.377346	0.587575	0.544108	0.669626	0.480775	0.383731	0.742557	0.639907
AF529169	0	0.110704	0.0383429	0	0	0.165406				0	0	0	0	0.0300484	0	0.0297023	0.0206422
AI115009	0	0	0	0	0	0				0	0	0.0418545	0	0	0	0	0
AI118078	5.36028	4.39126	4.14103	1.99158	1.52775	2.41492				0.399542	0.434294	0.585962	0.942437	0.300484	0.434895	0.920771	1.75458
AI182371	2.84257	1.66056	2.4156	2.29798	2.52547	2.08411				2.24188	2.04374	1.63232	2.08328	1.50242	1.9954	1.96035	1.54816
AI197445	0.324865	0.221408	0.191714	0.0382997	0.21825	0.694704				2.1087	1.86491	1.46491	0.892835	2.34378	1.86749	2.6138	1.83715
AI314180	164.301	142.07	151.416	138.568	160.04	158.624				210.048	218.195	178.551	180.7	180.411	184.089	185.55	165.612
AI314278	0.270721	0.405914	0.345086	0.268098	0.467679	0.330811				0.366247	0.306561	0.167418	0.173607	0.240387	0.153492	0.475237	0.454127
AI317395	1.08288	2.06647	1.0736	1.41709	0.498857	1.25708				0.665904	0.638668	0.585962	0.793631	0.480775	0.613969	0.534641	0.412843
AI413582	7.03875	7.71238	11.6179	8.00463	9.44711	8.93191				7.87986	7.17863	9.3754	7.56429	9.67559	11.7933	8.70277	8.0298
AI414108	16.2974	17.8233	20.2067	27.346	22.1992	14.9858				17.8129	18.4192	15.5699	9.42437	33.0232	18.4447	18.5342	10.7752
AI427809	0.216577	0.110704	0	0.306397	0.0623572	0.0661623				0	0	0	0	0.0300484	0	0.0594046	0
AI429214	8.93379	5.6459	6.59498	5.40025	7.20225	4.76369				10.943	10.2442	9.58467	5.0346	8.92438	7.93044	9.0592	4.10779
AI450353	3.35694	2.32478	2.53063	2.83418	2.99314	2.77882				1.82014	2.45248	1.50676	0.892835	1.47237	2.04656	1.60392	1.25917
AI462493	20.1958	20.8123	20.6668	23.3628	20.6402	18.1285				14.7054	10.9084	16.1977	14.6574	15.9858	19.8005	14.8808	14.2844
AI463170	0	0.295211	0	0	0	0.0992434				0.122082	0.0255467	0.0418545	0.024801	0.0901453	0.12791	0.0891069	0.144495
AI464131	20.4124	14.576	28.9872	4.36616	15.9011	7.31093				7.38044	6.28449	8.66387	10.4412	5.52891	3.91406	5.82165	6.15136
AI467606	0.0812163	0.996336	0.191714	0.191498	0.0623572	0.0330811				0.0332952	0	0.0418545	0.0744029	0.0300484	0.0255821	0.178214	0.0412843
AI504432	0.676802	1.25464	1.84046	0.459596	1.21597	0.56238				0.122082	0.127734	0.0837089	0.124005	0.0901453	0.0511641	0.237618	0.247706
AI506816	1.3536	1.58676	1.45703	1.11069	1.21597	1.38941				0.932266	0.970775	1.33934	0.868034	1.05169	0.74188	1.45541	0.846328
AI507597	0.0270721	0	0	0	0	0				0	0	0	0	0	0	0	0
AI593442	0	0.110704	0	0.880892	0.311786	0.165406				0.0110984	0	0	0	0	0	0	0
AI597479	47.5657	41.8461	41.7554	44.3893	48.2021	46.049				41.3859	40.9769	33.944	33.0101	35.5473	31.4404	39.5634	27.4954
AI606473	0	0	0	0	0.0311786	0				0	0.0255467	0	0	0	0	0.0891069	0
AI607873	0	0.516618	0.0766858	0	0.124714	0				0.0887872	0.22992	0.460399	0.396815	0.210339	0.255821	0.178214	0.392201
AI646519	0	0	0	0	0	0				0	0	0	0	0	0	0	0
AI661453	55.6061	68.5995	66.3715	81.8464	79.8796	83.2653				73.3826	91.2018	107.231	103.296	109.947	89.8186	90.3247	157.046
AI662270	0.0812163	0	0.0766858	0	0.124714	0				0.055492	0.0766402	0.125563	0.0496019	0.180291	0.102328	0.0297023	0.0412843
AI747448	0	0	0	0	0	0				0	0	0	0	0	0	0	0.0206422
AI837181	34.544	35.2777	34.2785	35.6187	30.6486	32.3203				20.2435	22.4045	22.9362	30.1332	26.9534	25.4286	22.9896	40.2109
AI839979	0.243649	0.258309	0.383429	0.268098	0.498857	0.363893				0.055492	0.0255467	0.0418545	0.024801	0.0901453	0.102328	0.0297023	0.0206422
AI846148	30.1312	29.152	28.7572	25.4693	26.6889	28.1851				16.1482	17.1929	18.416	17.6087	16.737	19.2889	18.059	19.7339
AI847159	0	0	0	0	0	0				0	0	0	0	0	0	0	0
AI848285	0.622658	1.07014	0.958572	0.382997	0.21825	0.529298				0.0110984	0	0	0.0744029	0	0.0255821	0	0.0206422
AI854517	0	0	0	0	0	0				0	0	0	0	0	0	0	0
AI854703	0.758019	0.885632	0.345086	0.995791	0.779465	0.694704				0.710298	0.485388	1.08822	0.52082	1.77286	1.2791	1.3069	0.743118
AI987944	19.7085	14.207	15.7973	15.5497	17.6159	17.3345				9.6778	9.86103	9.29169	8.35792	7.36186	8.16068	9.62354	6.93576
AK010878	6.76802	6.05182	7.70692	7.23864	6.45397	5.88844				6.13742	7.383	6.90598	4.29057	6.85104	6.88157	5.64343	5.3876
AK129341	2.3282	1.62366	1.72543	2.60438	3.14904	2.11719				1.86453	1.89046	2.3857	1.28965	1.44232	1.81633	2.31678	1.05275
AU015228	0	0	0	0	0.0311786	0				0	0	0	0	0	0.0255821	0	0
AU015791	0	0	0	0	0	0				0	0	0	0	0	0	0	0
AU015836	0	0	0	0	0	0				0	0	0	0	0	0	0	0.0206422
AU016765	0	0	0	0	0	0				0	0	0	0	0	0	0	0
AU018091	1.24532	0.959434	0.498458	0.306397	0.311786	0.661623				1.24302	1.66054	1.46491	2.6289	1.56252	1.07445	0.77226	2.02293
AU018829	0	0	0	0	0	0				0	0	0	0	0	0	0	0
AU019823	43.8297	40.4069	37.9595	34.508	40.6257	35.9923				40.0208	42.3309	38.4642	33.3821	34.0749	35.1498	37.3655	31.1903
AU019990	0	0	0	0	0	0.0330811				0.0221968	0.0255467	0.125563	0.024801	0	0.0255821	0.0297023	0.0619265
AU021063	0.0812163	0.221408	0.153372	0.153199	0.21825	0.29773				0.0887872	0.0766402	0.0837089	0.297612	0.0901453	0.0767462	0.0297023	0.103211
AU021092	0.108288	3.43182	1.15029	0.0382997	0	0				0.0110984	0	0	0	0.0300484	0	0.0297023	0
AU022252	11.2078	11.7346	15.4138	12.6389	8.8859	12.7693				12.1527	11.9814	10.6729	13.5165	11.5686	11.1794	10.2176	11.7867
AU022751	0	0	0	0	0	0				0	0	0	0	0	0	0	0
AU022754	1.48897	1.07014	1.6104	2.79588	1.62129	2.05103				1.47609	1.83936	1.08822	1.19045	1.38223	1.53492	1.78214	0.722475
AU022793	0	0	0	0	0	0				0	0	0	0	0	0	0	0
AU023762	1.10996	0.996336	1.26532	0.880892	1.06007	1.15784				0.821282	0.791948	1.08822	0.744029	0.841356	0.613969	0.950473	0.619265
AU040320	59.0984	52.0678	61.8087	54.0408	61.8895	65.4014				54.815	53.2138	48.4256	62.8952	60.6678	53.7223	53.375	65.415
AU040972	0.0270721	0	0.153372	0.0382997	0.0623572	0.0330811				0.0887872	0.0510934	0.125563	0.0992039	0.180291	0.102328	0.148511	0.165137
AU041133	8.93379	5.20309	8.24372	6.28115	9.26004	9.75894				4.48375	4.57286	3.18094	3.05052	4.65751	3.428	5.37611	2.33256
AV039307	0.758019	0.295211	0.306743	0.536195	0.966536	0.264649				0.355149	0.178827	0.125563	0.173607	0.330533	0.204656	0.207916	0.0619265
AV051173	0.51437	0.479717	0.191714	0.191498	0.21825	0.0661623				0.166476	0.178827	0.125563	0.148806	0.240387	0.230239	0.178214	0.103211
AV320801	0	0	0	0	0	0				0	0	0	0	0	0	0	0
AW011738	6.36194	8.70871	6.13486	4.94066	5.95511	3.73817				7.68009	7.48519	5.85962	5.67942	9.10467	7.82811	8.79188	7.45182
AW046200	0.51437	0.442816	0.345086	0.689394	0.841822	0.496217				0.677002	0.383201	0.544108	0.297612	0.510823	0.409313	0.801962	0.28899
AW112010	0.270721	0.885632	0	0.229798	0.21825	0.165406				0.321854	1.17515	0.544108	0.694427	0.450726	0.306985	0.267321	0.701833
AW146154	20.7914	15.8676	18.7497	16.8519	20.9208	19.9149				11.3981	13.8208	10.9659	9.42437	10.0662	11.3329	14.2274	9.22704
AW209491	10.9913	10.9597	9.85412	11.4516	11.692	11.0822				11.8753	9.70775	10.1706	8.06031	10.9076	9.77235	9.80176	7.26604
AW495222	0	0	0	0	0.0311786	0.0661623				0	0	0	0	0	0	0	0
AW549542	0.0541442	0.147605	0	0	0	0.132325				0.0665904	0.0510934	0.0418545	0	0.0600968	0.0767462	0.0297023	0.165137
AW549877	213.734	168.565	179.828	164.765	166.993	178.87				229.426	237.84	183.364	187.074	182.604	175.16	233.757	150.399
AW551984	0.0270721	0.0369013	0.153372	0.0765993	0	0.0330811				0.055492	0	0.0837089	0.0496019	0.0300484	0	0.0594046	0
AW554918	30.1854	23.3216	36.119	31.0227	31.1786	25.9025				25.382	28.7912	21.7225	22.0481	23.1974	22.0517	25.4846	19.6307
AW822252	0	0	0	0	0	0				0	0	0	0	0	0	0	0
AY074887	0.13536	0	0	0.114899	0	0.0661623				0.0998856	0.0766402	0.125563	0.024801	0.0600968	0.0511641	0.0297023	0.0206422
AY358078	0	0.0738026	0.0383429	0	0	0				0.0221968	0.0255467	0.0418545	0	0	0.0511641	0	0
AY512915	0	0	0	0	0	0				0	0	0	0	0	0	0	0
AY512931	5.84757	3.50563	3.06743	3.90657	5.11329	3.17579				5.5714	5.23708	4.31101	3.67054	4.47722	5.11641	3.35636	3.36467
AY761184	0	0	0	0	0	0				0	0	0	0	0	0	0	0
AY761185	0	0	0	0	0	0				0	0	0	0	0	0	0	0
Aaas	48.7839	56.09	79.8682	69.4756	58.8028	43.0717				44.8042	42.5608	49.3883	42.8561	63.3721	48.5292	38.8209	33.399
Aacs	22.3074	27.0118	26.3032	22.8266	23.6646	22.6606				24.3499	22.5578	27.7076	26.7354	28.7563	31.5427	37.0685	25.4518
Aadac	4.25032	16.2735	7.24681	10.9537	10.0083	8.7665				38.8333	29.813	43.1938	33.8037	34.7961	49.2711	55.3354	33.5435
Aadacl2	2.03041	0.664224	0.920229	2.68098	0.810643	0.529298				31.2087	21.1527	24.2337	18.2039	21.7551	26.8867	32.4646	15.8119
Aadacl3	0.379009	0.0369013	0.958572	1.41709	0.21825	0.165406				6.65904	5.0327	10.1288	6.84507	9.52535	14.4794	20.2867	13.6238
Aadat	0	0	0.153372	0.0382997	0	0.0330811				0	0	0	0	0	0	0	0.0206422
Aaed1	11.2891	10.111	9.08727	9.42172	12.3155	13.3317				12.4635	11.6749	10.8822	10.9372	10.7573	10.8724	13.8413	12.3853
Aagab	71.9306	66.6807	79.1014	86.1742	79.4742	81.3465				69.5759	63.7902	60.4797	63.4905	74.9708	70.9646	76.1864	58.2315
Aak1	100.492	91.5522	103.833	105.516	106.943	112.311				93.4485	104.869	74.6683	89.1595	91.5275	81.7603	88.2455	95.1603
Aamdc	14.1046	13.8749	14.8387	18.0008	17.3041	17.1691				9.27826	8.48151	7.86864	8.15952	8.71404	8.59557	7.45527	7.8853
Aamp	176.618	178.971	162.037	158.905	168.458	159.947				153.402	136.547	169.762	181.047	172.087	187.951	142.363	174.158
Aanat	0	0	0	0	0.0311786	0				0	0	0	0.024801	0.0901453	0	0	0.0206422
Aar2	29.0754	29.3365	29.294	28.112	30.6486	33.6104				27.4685	21.4337	27.0798	24.8754	26.1722	23.7402	24.3559	23.3256
Aard	0.13536	0.110704	0.2684	0	0.249429	0.132325				0.0221968	0.0255467	0	0	0	0	0	0
Aars	71.9035	85.1682	70.0525	69.8203	63.7602	59.91				69.3761	56.9181	67.3438	78.2966	69.2015	65.2598	65.4935	59.9861
Aars2	25.8809	23.8013	28.6805	22.4053	23.9763	26.3988				23.3066	25.5723	20.718	28.8435	26.4426	25.9146	24.6529	23.7385
Aarsd1	27.776	35.5729	32.5915	32.1717	31.3657	29.0783				24.0724	19.9264	26.2427	26.537	24.0087	25.5053	26.4944	22.5825
Aasdh	48.4049	36.4585	43.3658	42.0147	53.5336	41.1199				33.2397	33.2874	24.9034	24.0321	29.177	29.3938	31.425	20.477
Aasdhppt	37.8739	38.8571	42.3689	35.0442	41.031	34.8345				41.508	42.9696	45.4958	31.15	38.1915	38.7568	44.9396	28.4449
Aass	0.947523	1.18084	0	0.114899	0.4365	0.231568				0.0332952	0.0255467	0	0	0.0300484	0.0511641	0	0
Aatf	34.3274	37.1965	38.2662	36.1932	35.4812	30.7655				46.0806	44.2725	44.0309	43.1785	42.6087	46.0477	42.6228	41.0779
Aatk	0.0541442	0.184507	0.0383429	0.191498	0.124714	0.231568				0.0221968	0.0255467	0.0418545	0.024801	0.0300484	0.0255821	0.0297023	0
Abat	5.98293	9.00392	6.63332	10.8771	7.10872	10.6852				0.166476	0.281014	0.167418	0.198408	0.360581	0.486059	0.65345	0.268348
Abca1	441.167	262.036	370.852	250.288	371.805	423.935				231.624	248.953	142.807	264.552	159.617	144.283	213.262	262.754
Abca12	15.7289	15.2033	12.078	14.3241	8.54293	7.50942				198.972	169.911	164.99	113.291	163.674	152.213	154.571	119.91
Abca13	0	0.0369013	0.0383429	0	0	0				0	0	0	0	0	0	0	0
Abca14	0	0	0	0	0	0				0.0110984	0	0	0.024801	0	0	0	0
Abca15	0	0	0	0	0	0				0	0	0	0	0	0	0	0
Abca16	0	0	0	0	0	0				0	0	0	0	0	0	0	0
Abca17	0.243649	0	0	0.153199	0.0311786	0.0992434				0.0665904	0.102187	0.0418545	0	0.180291	0.0767462	0.0891069	0
Abca2	77.724	60.8134	92.9048	87.8977	91.7586	106.19				100.318	97.2308	87.5595	125.666	118.481	99.9747	117.443	120.158
Abca3	48.6756	41.4402	53.5267	49.6364	51.5382	57.065				38.4116	34.4114	30.7212	40.996	42.3382	37.0428	40.1278	40.9334
Abca4	0.379009	0.590421	0.651829	0.421296	0.779465	0.694704				2.86339	3.75537	2.30199	10.1188	2.7945	6.49784	5.91076	13.4174
Abca5	23.8776	17.8602	22.7373	27.3077	29.0584	31.394				17.0471	16.8608	13.5608	12.9957	13.5218	12.8678	18.8015	13.0458
Abca6	0.0541442	0.295211	0.191714	0.0765993	0.187072	0.165406				0.233066	0.178827	0.0418545	0.0992039	0.300484	0.179074	0.118809	0.206422
Abca7	33.5423	32.6208	39.9916	44.6191	36.2607	38.6388				74.5701	87.3953	75.7984	109.447	92.3388	80.7882	83.5525	92.8484
Abca8a	0.568514	0.0738026	0.5368	0.536195	0.280607	0.165406				0	0.0766402	0.0418545	0.0992039	0.0300484	0.0255821	0	0
Abca8b	0.0812163	0.110704	0.383429	0.344697	0.21825	0.0992434				0.288558	0.281014	0.167418	0.24801	0.300484	0.153492	0.504939	0.185779
Abca9	0.0270721	0.147605	0.2684	0.114899	0.187072	0.0330811				0.0221968	0.0510934	0	0.0496019	0.0300484	0.0255821	0.0594046	0
Abcb10	22.7406	24.2073	18.9797	24.7033	25.5353	23.3553				33.495	31.2692	34.4881	28.5211	33.0533	33.7172	33.4448	29.7041
Abcb11	0.893379	0.701125	0.0766858	0.0765993	0.124714	0.0992434				0.0221968	0.0766402	0	0.124005	0	0.0255821	0	0.0412843
Abcb1a	1.43482	3.76393	1.49537	1.07239	2.05779	2.87806				0.110984	0.15328	0.0837089	0.148806	0.270436	0.179074	0.0891069	0.0825686
Abcb1b	26.3953	29.1151	31.1344	36.0783	32.644	31.7248				55.9248	67.5455	52.1088	51.2884	69.9527	57.9945	55.3057	48.6742
Abcb4	0	0	0	0	0.0935358	0.0992434				0.0332952	0.0255467	0	0	0.0300484	0.0255821	0.0297023	0
Abcb5	0	0	0	0	0	0				0.0221968	0	0	0	0	0	0	0
Abcb6	11.5598	10.6276	18.673	10.992	12.565	11.7438				13.1849	12.1347	12.1378	16.443	15.8355	13.3538	12.2373	14.2844
Abcb7	33.6777	38.9309	39.2631	36.9209	37.4143	31.0632				48.4112	49.3307	46.7933	42.2112	40.1747	38.8847	52.0978	35.2981
Abcb8	35.9247	30.5912	40.3751	34.891	35.2942	32.4857				32.0633	27.335	30.8886	39.9544	34.135	33.4102	32.9101	32.2224
Abcb9	7.09289	12.325	4.75452	9.34512	6.01747	11.8431				10.6656	9.91213	9.79394	17.5839	9.19482	10.3863	10.9898	13.7064
Abcc1	164.734	127.088	148.464	132.708	127.583	115.288				357.646	323.396	289.717	353.116	312.744	278.947	295.983	296.71
Abcc10	37.5219	30.296	47.5452	34.1633	38.9109	41.7815				27.6572	33.5684	22.8107	38.4167	33.3538	35.1242	30.7122	37.9816
Abcc12	0.0270721	0	0.0383429	0.268098	0.0623572	0.0330811				0.0332952	0	0.0418545	0.024801	0	0	0.0594046	0
Abcc2	0	0	0.115029	0.0382997	0.0623572	0.0330811				0.0332952	0.0766402	0.0418545	0	0.0600968	0	0.0297023	0.0412843
Abcc3	32.5677	23.8383	28.067	17.5795	23.4463	25.9356				18.501	16.3499	18.9601	21.9489	21.1541	22.7425	19.9005	25.2866
Abcc4	6.84924	9.48364	11.0811	11.6431	7.32697	4.63136				77.8775	73.1913	62.9072	67.3842	65.806	64.8761	64.0678	71.4838
Abcc5	307.187	222.072	229.482	229.492	273.81	185.354				385.88	467.096	286.368	397.733	474.945	380.022	375.615	372.735
Abcc6	9.1233	5.12928	14.877	6.89394	7.35815	10.0567				3.02986	4.2663	2.00901	6.42345	2.25363	2.45588	1.66333	4.52063
Abcc8	0.0270721	0.110704	0	0	0.0623572	0.0992434				0.133181	0.0510934	0.125563	0.148806	0.0901453	0.0767462	0.0891069	0.165137
Abcc9	0.974595	0.295211	1.15029	0.995791	0.779465	0.595461				0.577117	0.562028	0.418545	0.297612	0.510823	0.434895	0.712855	0.392201
Abcd1	12.5885	10.4062	12.1164	10.5324	11.349	17.2684				3.14085	2.83569	2.05087	4.26577	3.8462	3.35125	3.77219	5.44953
Abcd2	1.08288	0.701125	1.03526	1.60859	1.65247	1.52173				0.865675	0.843042	1.17192	1.14084	0.991598	0.946536	0.801962	0.701833
Abcd3	131.76	139.339	118.556	137.917	117.232	122.202				214.155	209.381	204.752	171.3	193.181	190.663	228.411	168.295
Abcd4	72.8239	62.8798	75.3438	66.6414	67.034	70.099				61.8736	75.3373	62.0283	81.1488	77.3446	70.3251	61.3946	63.5366
Abce1	115.896	144.1	116.447	119.38	119.352	95.0091				184.788	171.342	188.01	129.709	153.307	153.748	159.798	123.605
Abcf1	115.435	117.937	134.622	123.785	119.102	119.985				130.739	119.431	135.106	151.807	130.861	127.578	118.661	140.036
Abcf2	64.215	79.8175	75.6889	66.7563	65.8492	58.1236				86.0903	69.7425	89.1918	83.8769	81.7317	82.9626	73.7211	80.9172
Abcf3	63.1051	63.0644	56.1723	53.3131	59.5199	57.6604				53.461	49.8416	53.5318	58.0343	60.0668	56.6387	52.0087	49.3141
Abcg1	2.38234	3.13661	4.86955	8.04293	3.46082	3.10963				40.265	43.1995	27.4147	46.9234	39.3334	32.8985	36.2071	40.2316
Abcg2	50.9226	54.208	48.8872	32.3632	37.4767	24.8109				47.8341	50.0971	43.6542	60.5392	42.4284	40.4452	28.6033	35.3394
Abcg3	0.0812163	0.221408	0	0	0.0311786	0				0	0	0	0	0	0	0	0
Abcg4	1.92212	1.58676	3.7576	2.52778	2.86843	3.01038				2.56373	2.32475	2.46941	3.19932	3.39547	3.40241	3.71279	4.12843
Abcg5	0.189505	0.0738026	0.0383429	0	0.187072	0.0330811				0.0332952	0.0766402	0	0.0744029	0.0300484	0.12791	0	0
Abcg8	0	0	0	0	0	0				0	0.0255467	0	0.024801	0.0300484	0	0	0.0206422
Abhd1	4.76469	3.69013	5.48303	3.37037	4.33382	4.99525				3.91774	3.85755	3.13908	4.26577	4.20678	4.50244	3.8316	3.61238
Abhd10	18.3007	17.934	17.1393	18.9966	18.9254	15.482				12.6633	12.3646	13.0167	11.2348	11.809	11.2049	13.6036	10.0527
Abhd11	54.0359	55.8686	65.3746	53.8493	59.6135	54.6501				49.8762	49.8672	52.3181	58.4311	66.8878	70.1716	55.4542	61.782
Abhd11os	0.324865	1.69746	1.8788	5.05556	2.21368	2.34876				0.477231	0.485388	0.627817	0.297612	1.41228	1.79074	0.712855	1.11468
Abhd12	56.8243	48.0455	53.7184	48.3725	46.955	47.8023				75.0696	68.9761	64.5396	67.0618	66.2868	69.8646	62.1372	61.9265
Abhd12b	11.262	6.75294	21.9321	12.2176	18.7695	12.0746				20.9538	20.1819	12.1796	11.4084	27.314	22.768	16.96	10.7133
Abhd13	59.9376	60.8134	60.3134	50.7471	54.812	58.4875				66.5127	65.9105	61.6935	51.2388	56.2206	55.2828	57.6818	49.5205
Abhd14a	32.676	29.927	32.3614	38.0316	38.3185	39.135				12.7854	12.7734	14.3142	14.2606	13.4316	17.1144	14.3165	14.1192
Abhd14b	18.7339	19.078	18.3662	29.9503	27.5619	27.7882				37.5015	36.0975	33.1906	29.5379	35.1567	40.215	33.4745	34.8233
Abhd15	0.974595	0.442816	0.5368	0.612795	0.841822	0.760866				0.543822	0.868588	0.418545	0.545621	0.631017	0.409313	0.831664	0.76376
Abhd16a	59.7752	51.994	59.9683	63.9604	63.1055	70.6613				42.0851	44.7834	43.3612	55.6534	50.1508	49.4757	49.7513	56.0228
Abhd16b	0	0	0	0	0	0				0	0	0	0	0	0	0	0
Abhd17a	30.4561	30.8864	35.3521	39.4487	29.5573	33.015				20.9871	19.4155	23.5222	24.7514	24.5496	27.7821	21.95	25.555
Abhd17b	15.5394	17.9709	16.9092	18.92	16.3999	18.2939				19.9882	21.1782	18.8345	15.079	17.5483	16.4493	23.7915	13.5206
Abhd17c	29.0484	28.7461	29.3707	26.1204	23.8204	19.7164				46.1249	39.8784	42.4823	36.507	42.4584	44.7686	45.1475	35.4013
Abhd2	14.2399	16.5318	16.2574	16.4689	11.879	14.6549				27.968	30.6816	29.8422	27.1075	32.4523	33.4613	33.2369	34.8027
Abhd3	1.8409	0.701125	2.4156	2.33628	3.30493	2.71265				0.599314	0.843042	0.711526	0.669626	0.871404	0.972118	1.18809	0.887613
Abhd4	114.975	103.582	100.688	105.784	110.06	116.743				126.943	105.993	118.113	108.975	117.099	112.74	101.879	116.442
Abhd5	33.2987	33.2112	37.1159	42.053	35.3253	35.9923				114.946	95.8002	117.109	90.5483	104.689	106.293	116.492	111.158
Abhd6	8.636	11.6239	8.47378	9.26852	10.819	8.50186				16.1704	12.1858	12.9749	9.74678	16.8572	13.405	14.0789	11.0436
Abhd8	5.8205	11.1073	6.63332	9.00042	6.45397	9.46121				3.4738	3.09115	3.34836	4.19136	4.14668	3.30009	4.00981	4.9954
Abi1	137.607	127.494	123.387	123.631	131.168	121.044				182.158	187.692	173.403	146.549	160.098	151.164	191.817	137.807
Abi2	27.018	23.9121	25.9965	22.5968	27.7178	26.3326				15.5378	15.7879	15.8628	11.3092	14.2129	13.4306	16.9303	12.7775
Abi3	0.0541442	1.54986	0.498458	0.114899	0.0311786	0.0661623				0.0887872	0.0766402	0	0.024801	0.0300484	0.0511641	0.0297023	0.0412843
Abi3bp	115.896	61.9942	60.2367	27.4226	63.3549	40.0613				17.6354	33.6195	9.12427	29.7116	30.9799	30.3915	30.1181	33.688
Abl1	123.719	129.597	151.569	131.866	122.282	143.605				98.6093	100.296	86.9317	132.264	98.7391	93.6815	99.4136	130.108
Abl2	137.959	141.406	172.313	142.207	122.75	195.642				133.27	199.469	167.041	182.386	164.605	137.504	133.66	223.348
Ablim1	97.8656	122.955	181.247	199.963	149.564	192.665				334.572	279.583	295.534	291.486	335.28	323.767	359.606	318.839
Ablim2	1.27239	1.18084	1.30366	3.02567	2.43193	1.19092				1.44279	1.5328	1.00451	2.03368	1.74281	1.91865	2.22767	1.98165
Ablim3	106.989	100.519	99.5381	105.477	114.581	141.918				30.0545	53.8525	28.0843	34.7213	34.8261	35.3544	40.8703	38.0022
Abo	0	0.110704	0.0383429	0	0.0623572	0				0.133181	0.127734	0.125563	0.297612	0.0300484	0.0767462	0.118809	0.0619265
Abr	261.462	200.928	267.097	275.221	275.245	318.902				181.348	198.191	164.614	206.27	182.124	163.981	199.035	182.312
Abra	0	0	0	0	0	0				0	0	0	0	0	0	0	0
Abracl	54.2525	65.057	51.9546	51.2833	47.3915	43.3694				63.05	55.0532	71.9897	56.8686	52.8251	61.4225	71.7607	48.1581
Abt1	20.6289	18.8197	17.9445	21.218	18.9566	19.154				15.8596	15.9156	16.9511	14.8558	18.5098	15.8865	17.5541	15.172
Abtb1	40.3104	30.8864	42.5223	35.9634	40.1892	44.6596				28.7671	28.8422	25.4894	37.5239	32.5424	34.8939	33.9497	32.6765
Abtb2	30.6456	28.9306	33.2433	41.4019	40.9375	45.0234				6.43707	5.10934	8.53831	4.71218	7.66235	7.52113	7.54438	6.33714
Acaa1a	44.9126	41.514	47.2768	45.3851	45.739	49.0263				35.1042	31.1925	38.2131	39.2103	42.5786	35.687	39.6229	37.1765
Acaa1b	1.43482	1.21774	3.52755	3.90657	1.62129	1.52173				0.521625	0.715308	1.29749	0.471218	1.29208	2.40471	1.93065	0.722475
Acaa2	109.696	86.6812	114.108	120.682	123	152.206				106.334	96.8987	106.268	139.58	121.245	120.901	125.076	149.47
Acaca	87.0909	90.482	98.5029	76.3695	72.459	78.9647				135.5	118.051	119.453	116.639	120.043	121.515	130.512	109.383
Acacb	10.9642	10.111	16.9859	8.15783	8.82354	12.8024				7.02529	8.60924	7.40824	12.8469	9.97608	10.1049	17.1679	14.0573
Acad10	15.8101	12.5095	17.2543	15.0901	18.2707	20.0803				12.7299	13.5653	10.7984	16.6414	12.7405	14.5562	11.4651	13.6032
Acad11	85.223	80.8508	69.2473	66.1435	63.4173	53.4261				101.639	105.304	91.2427	91.5404	80.3194	91.3791	79.5724	76.6443
Acad12	4.06081	3.83774	3.87263	2.71928	5.54979	3.60585				1.25412	1.55835	1.33934	0.967238	1.29208	1.17677	1.3069	1.11468
Acad8	41.7993	32.7315	43.5192	36.8443	44.0554	40.2928				33.9833	32.2911	26.4939	36.7798	34.6158	32.1311	33.92	27.9495
Acad9	211.162	260.782	152.605	207.661	184.733	195.179				245.929	228.592	209.398	222.762	250.273	257.944	274.627	208.321
Acadl	93.0739	87.7882	73.1199	70.0501	77.6347	74.8296				87.2889	89.2091	82.2021	60.564	106.191	92.2489	92.1365	72.5365
Acadm	95.1855	72.1421	80.7885	89.0467	96.0924	95.5384				80.5744	80.089	71.4037	74.8741	76.1728	87.6697	86.4931	72.5572
Acads	31.918	28.0819	29.9841	28.0737	31.1474	28.4829				17.3912	17.6528	18.3322	21.8496	18.8704	21.3099	18.2966	23.6146
Acadsb	49.6232	50.6286	44.3244	54.9983	39.3162	41.5499				85.6464	78.173	80.7791	72.2948	77.555	75.3903	96.0275	68.2842
Acadvl	122.176	117.272	115.911	105.669	117.98	114.229				116.655	108.522	108.78	131.668	125.482	114.352	112.512	117.165
Acan	0	0	0.0766858	0	0.0311786	0				0	0	0	0	0	0	0	0
Acap1	0.541442	0.332112	0.958572	0.919192	0.530036	0.430055				0.366247	0.383201	0.292981	0.76883	0.39063	0.486059	0.237618	0.309632
Acap2	109.182	110.778	120.78	106.243	102.702	104.9				164.001	159.514	147.872	130.453	145.104	132.336	163.541	124.947
Acap3	56.689	42.6579	60.8502	50.5939	47.1109	64.012				73.0497	74.1877	78.5608	91.6644	82.8736	75.5182	76.5428	93.5915
Acat1	130.406	136.867	145.32	143.968	131.667	121.97				93.0712	81.9794	84.0856	88.5394	85.6981	94.2955	90.9781	79.2659
Acat2	13.5631	18.9673	23.6192	22.8649	15.8075	14.4565				11.7643	10.2698	12.5982	11.8549	13.1312	13.8399	14.4056	9.26833
Acat3	0.0541442	0	0.306743	0	0.0935358	0				0.0443936	0.0255467	0	0	0	0	0.0297023	0
Acbd3	59.8564	58.6731	49.2323	47.2235	57.431	55.3448				63.2498	61.7975	59.0985	49.3043	63.3421	53.4665	64.0975	51.6054
Acbd4	51.3828	41.5509	44.2477	49.5598	42.8706	51.9374				50.7308	50.6591	49.0116	55.8766	56.2507	60.1178	58.0086	57.2613
Acbd5	64.0526	58.7469	53.335	61.2795	56.0591	57.4289				88.0769	93.3988	85.8435	73.6341	68.8109	66.3343	86.9683	68.2017
Acbd6	28.1008	32.6946	31.2495	33.8186	30.8356	30.6662				20.9538	22.8899	22.2666	23.9577	22.1156	28.9589	22.6034	24.5022
Acbd7	0.243649	0.0369013	0.230057	0.229798	0.311786	0.0330811				0.122082	0.281014	0.251127	0.322413	0.210339	0.179074	0.118809	0.206422
Accs	21.1975	17.2698	22.5073	18.0008	22.5421	21.1389				6.47037	6.6166	5.44108	7.56429	5.55896	5.75596	6.56421	5.90366
Accsl	0.0812163	0.221408	0.230057	0.842593	0.311786	0.0661623				0.399542	0.562028	0.627817	0.24801	0.360581	0.434895	0.504939	0.206422
Acd	24.9334	28.3033	23.3125	32.976	30.3991	31.3609				18.6564	19.3133	20.8435	22.2961	21.5748	23.2029	19.7817	26.2981
Ace	7.33654	22.7312	20.5134	6.28115	10.4136	11.1483				0.954462	1.1496	1.00451	2.00888	1.44232	0.793044	0.445534	1.09403
Ace2	2.27406	1.03324	2.99075	3.79167	2.05779	1.15784				44.4935	37.2471	32.2698	44.6169	39.5137	42.7988	46.9593	47.1467
Ace3	0	0	0	0	0	0				0	0	0	0	0	0	0	0
Acer1	7.41775	1.77126	9.81578	9.38342	5.11329	2.54725				92.2388	60.8523	64.121	76.8334	95.2836	96.7002	103.067	82.0526
Acer2	9.39402	12.8417	9.81578	11.2601	8.69883	12.4054				14.6388	38.1157	12.1378	13.6653	13.3415	35.687	30.8013	21.7981
Acer3	57.9614	47.2706	84.201	71.5438	64.7268	69.2388				75.2804	90.0011	62.2376	75.5685	61.0584	64.6715	90.7702	74.5595
Ache	4.52104	1.58676	6.94006	3.67677	8.76118	6.3185				18.6231	21.4848	19.7134	19.0719	27.7347	24.8913	22.3955	20.8486
Acin1	357.46	310.598	336.766	297.129	333.611	315.363				281.078	296.981	258.953	296.793	305.713	283.833	276.885	268.348
Ackr1	0.595586	15.8307	6.97841	0.229798	0.748286	0.463136				0	0	0	0	0.0300484	0.0511641	0.0297023	0
Ackr2	0.406081	0	0.460115	3.44697	0.0935358	0.0992434				9.6778	9.29901	8.03605	12.3261	11.3583	17.4725	21.0886	14.0779
Ackr3	28.9671	22.805	53.2583	46.4192	37.7885	25.8033				106.944	123.442	96.4327	143.474	109.256	87.3116	91.6613	116.195
Ackr4	115.814	125.612	102.759	95.0981	129.173	158.062				120.695	140.073	83.96	148.682	131.792	127.194	126.71	157.107
Acly	145.025	156.056	154.714	160.322	152.245	157.863				201.003	167.408	209.607	195.456	210.85	202.277	223.629	184.706
Acmsd	0.568514	0.959434	0.728515	0.574495	0.685929	0.595461				0.577117	0.536481	0.334836	0.24801	0.330533	0.639552	0.564343	0.309632
Acn9	4.25032	4.50196	3.14412	2.48948	4.42736	3.47352				3.81785	3.32107	3.18094	2.75291	3.27528	4.22104	3.9207	2.74541
Acnat1	1.24532	1.32845	0.575143	1.26389	1.37186	1.55481				1.26522	1.63499	0.711526	0.719228	0.96155	1.12561	0.861366	0.908255
Acnat2	0	0	0	0	0	0				0	0	0	0	0	0	0	0
Aco1	59.9647	73.6181	66.2182	61.854	59.5199	63.8135				47.4901	46.2651	43.696	58.4559	48.2878	54.0293	58.6026	55.5274
Aco2	172.179	175.503	183.701	170.931	179.495	172.948				195.165	174.612	180.183	225.54	200.273	193.477	176.105	195.006
Acot1	19.6002	17.3436	17.0242	25.5076	37.009	36.7201				5.26064	3.55099	6.613	5.97703	7.27172	8.23742	9.41563	9.5986
Acot10	0.0270721	0	0	0	0.0935358	0.0661623				0.133181	0.127734	0.0837089	0.148806	0.0600968	0.102328	0	0
Acot11	14.1587	13.6904	14.6853	16.0859	16.0258	22.2305				3.55149	3.14225	4.72955	4.11696	3.99644	4.24662	3.41576	3.77751
Acot12	0.297793	0.0369013	0.153372	0	0	0.0661623				0.0443936	0	0.0418545	0.0496019	0.0300484	0.0511641	0.0297023	0.0619265
Acot13	18.0571	22.5467	18.673	20.6818	19.5802	19.3194				16.4589	13.5653	15.9884	14.5086	14.7838	18.0354	14.4056	12.8394
Acot2	4.33154	2.8045	3.06743	3.94487	6.67222	5.7892				3.42941	2.60577	2.42756	3.05052	3.96639	3.68382	4.09892	4.37614
Acot3	0	0	0	0	0	0				0.0110984	0	0	0	0	0	0	0
Acot4	0.379009	0.184507	0.383429	0.191498	0.4365	0.926272				0.677002	0.357654	0.75338	0.545621	0.751211	0.613969	0.65345	0.784402
Acot5	0	0	0	0.0382997	0.0311786	0.0330811				0	0	0	0.024801	0	0.0767462	0.178214	0.0412843
Acot6	1.6514	0.996336	1.95549	1.72348	1.71482	2.21644				1.93112	1.81382	1.42305	1.33925	1.38223	1.33027	1.75244	1.40367
Acot7	14.1858	14.0225	17.0626	17.8093	19.5802	19.584				2.03101	2.27366	2.88796	2.6041	3.24523	3.17218	4.18802	3.94265
Acot8	12.9405	13.3214	14.532	14.9752	12.0661	13.5302				9.07849	9.58002	10.3799	9.57317	9.82583	11.077	10.3958	10.7546
Acot9	40.4728	41.8092	41.4487	52.5854	44.0865	37.117				90.1745	109.136	96.7675	91.4163	71.7256	83.3975	96.681	80.8966
Acox1	112.187	93.2865	98.4262	91.4979	107.629	108.672				108.065	97.6907	95.4282	104.139	106.492	111.435	106.245	105.605
Acox2	0.162433	0.221408	0.383429	0.0765993	0.311786	0.0992434				0.244165	0.204374	0.167418	0.148806	0.180291	0.306985	0.891069	0.371559
Acox3	39.3899	28.2295	43.0974	30.2184	46.7991	42.4431				39.1108	39.9295	30.5119	40.3016	37.5004	39.3708	36.9199	37.032
Acoxl	0	0	0.383429	0.0382997	0	0				0.110984	0.638668	0.0418545	0.372014	0.631017	0.818626	1.96035	0.557338
Acp1	69.0068	71.6255	66.1415	74.646	65.5686	57.5281				72.639	61.261	73.2453	60.7376	63.8529	66.2575	69.2954	53.9173
Acp2	45.9413	35.0563	37.4993	32.4781	42.59	40.5575				27.2466	22.8388	18.3322	21.9241	21.0038	20.9261	21.4748	17.7935
Acp5	74.0151	66.4593	39.1097	34.9293	39.098	36.8855				79.398	59.2939	69.3528	74.4277	68.1799	69.2762	74.2854	68.8209
Acp6	35.1937	36.9382	36.6558	42.7424	40.9998	36.9847				33.6503	36.7106	34.2788	32.7621	41.0461	39.6266	38.7021	32.9655
Acpp	411.252	400.047	442.975	549.83	679.194	794.444				487.575	543.43	415.866	438.903	483.72	468.177	526.651	529.451
Acpt	0	0	0	0	0	0				0	0	0	0	0	0	0	0
Acr	0	0.147605	0.191714	0.344697	0.0311786	0.0661623				0.0110984	0	0	0.024801	0	0	0	0
Acrbp	14.8897	16.0152	14.9921	14.2092	19.2684	16.6067				12.5079	15.1237	11.4681	11.8053	15.0843	13.2771	11.2869	12.0757
Acrv1	0	0	0	0	0	0				0	0	0	0	0	0	0	0
Acsbg1	101.872	60.186	107.974	98.545	162.565	103.246				300.489	319.283	197.972	297.339	362.564	277.335	361.625	363.384
Acsbg2	0.13536	0.0369013	0.0766858	0.0382997	0.124714	0.165406				0.299657	0.306561	0.37669	0.297612	0.210339	0.255821	0.178214	0.309632
Acsf2	46.3745	46.6433	61.6554	60.2837	47.9839	60.9355				21.5864	22.43	21.5132	31.0756	24.9402	21.7448	29.5835	36.2683
Acsf3	20.277	17.8602	19.9766	21.218	23.6334	22.9583				12.7521	11.9814	12.4726	15.8478	13.4016	14.0446	13.7819	14.6353
Acsl1	22.4157	19.7422	31.6329	36.2315	19.1748	23.7523				224.121	190.962	188.596	260.906	228.939	233.641	294.32	286.1
Acsl3	106.799	76.9392	94.9753	56.8367	118.479	80.5195				41.9187	55.6663	53.7411	45.0633	44.081	43.0034	46.8999	57.8393
Acsl4	25.4478	33.8754	29.8308	32.2866	25.3794	25.9687				61.7515	62.3851	51.3973	57.4886	44.8322	56.7154	89.5524	62.0916
Acsl5	119.226	129.192	134.737	145.922	141.956	112.443				281.023	265.073	252.801	198.953	270.286	263.981	287.993	166.169
Acsl6	0.0270721	0	0	0	0.0311786	0				0	0	0	0	0	0	0.0297023	0.0206422
Acsm1	0.893379	1.03324	0.690172	0.191498	0.342965	0.132325				1.17643	0.613121	2.09272	0.421616	1.29208	0.793044	1.2475	0.433485
Acsm2	0.216577	0.110704	0	0	0.155893	0				0.055492	0.127734	0.0837089	0.024801	0.0901453	0.102328	0.0891069	0.0825686
Acsm3	0	0.110704	0.2684	0.114899	0.0311786	0				0.0443936	0.0255467	0.0418545	0.024801	0	0	0.0594046	0
Acsm4	0	0	0	0	0	0				0	0	0	0	0	0	0	0
Acsm5	0	0	0	0	0	0				0.0887872	0.0766402	0.251127	0.024801	0.120194	0.0767462	0.148511	0.0206422
Acss1	10.8559	10.1479	15.0304	8.92382	10.9437	12.7032				4.96098	5.31372	3.80876	4.73698	4.74765	5.88387	4.90088	5.42889
Acss2	7.82384	8.00759	8.16704	9.80471	11.9102	9.36197				10.1217	9.37565	9.04056	12.2517	12.44	12.5352	16.2769	11.8486
Acss2os	0	0	0	0	0	0				0	0	0.0418545	0	0	0	0	0
Acss3	0	0	0	0	0	0				0	0.0255467	0	0	0.0300484	0.0511641	0	0.0206422
Acta1	0	0.0369013	0.115029	0.0382997	0.0311786	0.0661623				0.0776888	0.306561	0.251127	0.24801	0.120194	0.281403	0.0297023	0.412843
Acta2	22.3886	20.8861	3.2208	10.609	31.771	3.90358				6.54806	4.2663	10.2962	5.65462	10.8775	6.7025	6.74242	4.04586
Actb	759.291	954.858	631.737	792.956	844.129	697.979				902.833	938.075	1289.66	1180.82	1181.59	1152.32	1094.56	1720.46
Actbl2	0	0	0	0	0	0				0	0	0	0	0	0	0	0
Actc1	0	0	0	0	0.0623572	0				0.0110984	0	0	0	0.0300484	0.0255821	0	0
Actg1	1998.54	2702.84	1391.2	2125.25	2258.45	1753.17				2450.53	2354.36	3283.65	2677.49	3114.79	3006.89	2509.99	3512.68
Actg2	0	0	0	0	0	0.0330811				0.0110984	0	0.0418545	0.0496019	0.0300484	0	0.0297023	0.0206422
Actl10	0	0.0738026	0.345086	0	0	0				0.0110984	0.127734	0	0.0496019	0.0300484	0	0.0891069	0.0825686
Actl11	0	0	0	0	0.0311786	0				0.0443936	0.0766402	0	0.124005	0.0600968	0.0511641	0.0594046	0.227064
Actl6a	57.6365	62.806	59.3165	54.7302	52.4424	45.1227				72.1507	64.8887	67.5949	62.3248	71.6655	68.9437	63.9787	53.4838
Actl6b	0	0	0	0.153199	0	0				0.0110984	0	0	0.024801	0.0600968	0.0255821	0	0
Actl7a	0	0	0	0	0	0				0	0	0	0	0	0	0	0
Actl7b	0	0.0738026	0	0.0765993	0	0.198487				0.055492	0.127734	0	0.0744029	0.0901453	0.102328	0.0594046	0.268348
Actl9	0.866307	0.258309	0.460115	0.306397	0.342965	0.264649				0.332952	0.485388	0.251127	0.272811	0.270436	0.306985	0.297023	0.28899
Actn1	726.832	717.804	556.01	577.789	715.705	580.872				97.9656	86.399	108.696	103.891	87.8916	87.0302	76.4834	78.8943
Actn2	1.51604	1.03324	2.26223	2.64268	2.05779	1.45557				0.432838	0.510934	0.251127	0.620024	1.05169	0.460477	1.36631	1.15596
Actn3	0.162433	0.295211	0.153372	0.536195	0.748286	0.396974				0.188673	0.0255467	0.0837089	0.223209	0.120194	0.12791	0.207916	0.268348
Actn4	619.572	653.412	690.172	848.721	736.376	629.766				582.355	566.677	642.508	684.556	665.633	647.124	629.57	738.287
Actr10	83.5445	82.0685	80.0216	80.9272	81.5008	75.822				80.7742	79.2204	82.9974	66.913	72.1463	73.5484	80.8496	61.1627
Actr1a	148.978	183.436	156.401	182.268	157.67	169.375				182.768	161.404	190.563	174.946	185.218	182.247	186.263	171.949
Actr1b	77.4262	83.1756	77.2226	74.0716	79.0377	77.4761				69.1319	62.6661	69.1017	71.9228	73.0778	73.3438	64.9886	63.165
Actr2	146	153.731	147.428	140.598	138.339	133.019				295.817	276.39	291.893	247.39	233.476	230.494	288.914	219.901
Actr3	265.388	343.625	251.989	311.759	259.78	255.056				470.827	465.768	468.686	380.149	383.208	387.005	413.961	333.144
Actr3b	1.94919	1.88197	2.03217	1.99158	2.27604	2.01795				0.321854	0.255467	0.418545	0.347213	0.39063	0.434895	0.564343	0.247706
Actr5	16.5952	16.1259	18.7497	17.3114	18.863	19.1209				13.8952	14.5105	12.1796	14.7318	17.5783	16.8586	14.9997	14.4289
Actr6	13.7256	12.8048	12.9599	11.6431	14.8098	13.8941				10.0219	10.7807	10.5055	6.72106	8.71404	8.08393	10.6334	7.34861
Actr8	39.8772	34.8348	36.7708	32.8228	37.3831	38.2749				29.2554	29.0466	24.4849	28.5707	28.1253	27.6798	25.1281	24.7706
Actrt1	0	0	0	0	0	0				0	0	0	0	0	0	0	0
Actrt2	0	0	0	0	0	0				0	0	0	0	0	0	0	0
Actrt3	0.108288	0	0	0	0	0				0.0110984	0	0	0.0992039	0	0	0	0.0206422
Acvr1	42.4761	48.7835	43.8643	40.8274	40.3763	41.583				45.1927	42.6375	47.17	41.988	45.6135	39.8057	44.4643	41.6765
Acvr1b	180.3	136.609	181.055	144.888	166.993	186.379				123.026	118.92	106.31	164.852	127.135	102.149	137.076	143.731
Acvr1c	0.0541442	0	0.2684	0	0.0311786	0				0.055492	0.127734	0.125563	0.0992039	0.0300484	0.102328	0.0891069	0.0412843
Acvr2a	135.685	109.597	152.336	119.84	122.906	123.36				104.236	108.625	79.9839	81.9672	81.0106	70.6065	94.1563	82.3828
Acvr2b	3.68181	3.54253	6.78669	5.55345	3.95968	6.74855				2.20858	2.75905	1.63232	3.00092	2.49402	2.30239	2.85142	4.0665
Acvrl1	33.407	32.2148	32.7065	28.763	32.1451	38.6388				6.9698	7.58738	7.78493	11.458	7.45201	6.19086	8.04932	10.3624
Acy1	18.0571	18.1923	22.6223	19.3796	18.9254	17.2022				10.3881	10.2953	11.7192	14.9798	12.0795	13.8911	12.6235	11.9724
Acy3	2.08455	2.9152	1.342	3.06397	2.30722	2.18336				1.74245	2.37584	1.79974	2.4801	2.31373	2.25122	1.60392	2.08486
Acyp1	8.55478	9.92645	8.97224	10.4941	9.82126	9.39505				7.41373	6.51441	7.49195	5.233	7.54215	8.26301	8.04932	5.61467
Acyp2	0.216577	0.664224	0.0766858	1.22559	0.65475	0.694704				0.377346	0.102187	0.627817	0.322413	0.57092	0.511641	0.861366	0.28899
Ada	7.14703	8.4873	8.28206	6.74074	7.01518	4.82985				6.82552	5.67137	9.91951	14.707	9.97608	10.7189	9.59384	17.3601
Adad1	0	0.295211	0.383429	0	0.0623572	0.0661623				0.0332952	0.0510934	0	0.024801	0.0300484	0.0255821	0.0594046	0
Adad2	0	0	0.0383429	0	0	0				0.0221968	0.0510934	0.167418	0.024801	0.0901453	0.153492	0.267321	0.227064
[truncated: 22,063 more rows]
