# Supplementary figures and images for: Loss of Dnmt3a and Dnmt3b does not affect epidermal homeostasis but promotes squamous transformation through PPAR-γ
Source: eLife journal article supplement (doi:10.7554/elife.21697), 2017-04-20

Figure 5 Supplement 1

A

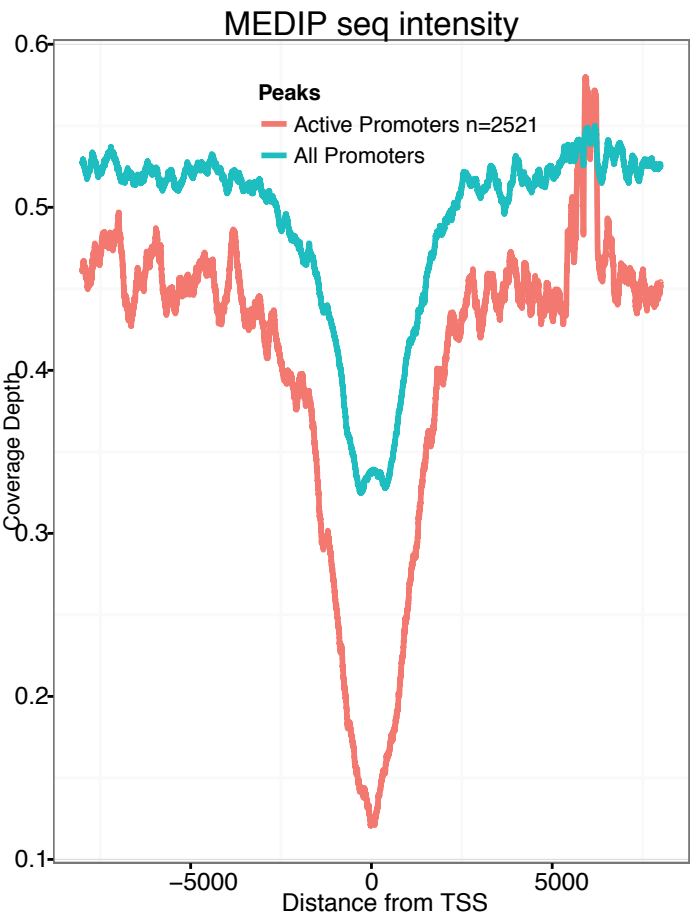

B

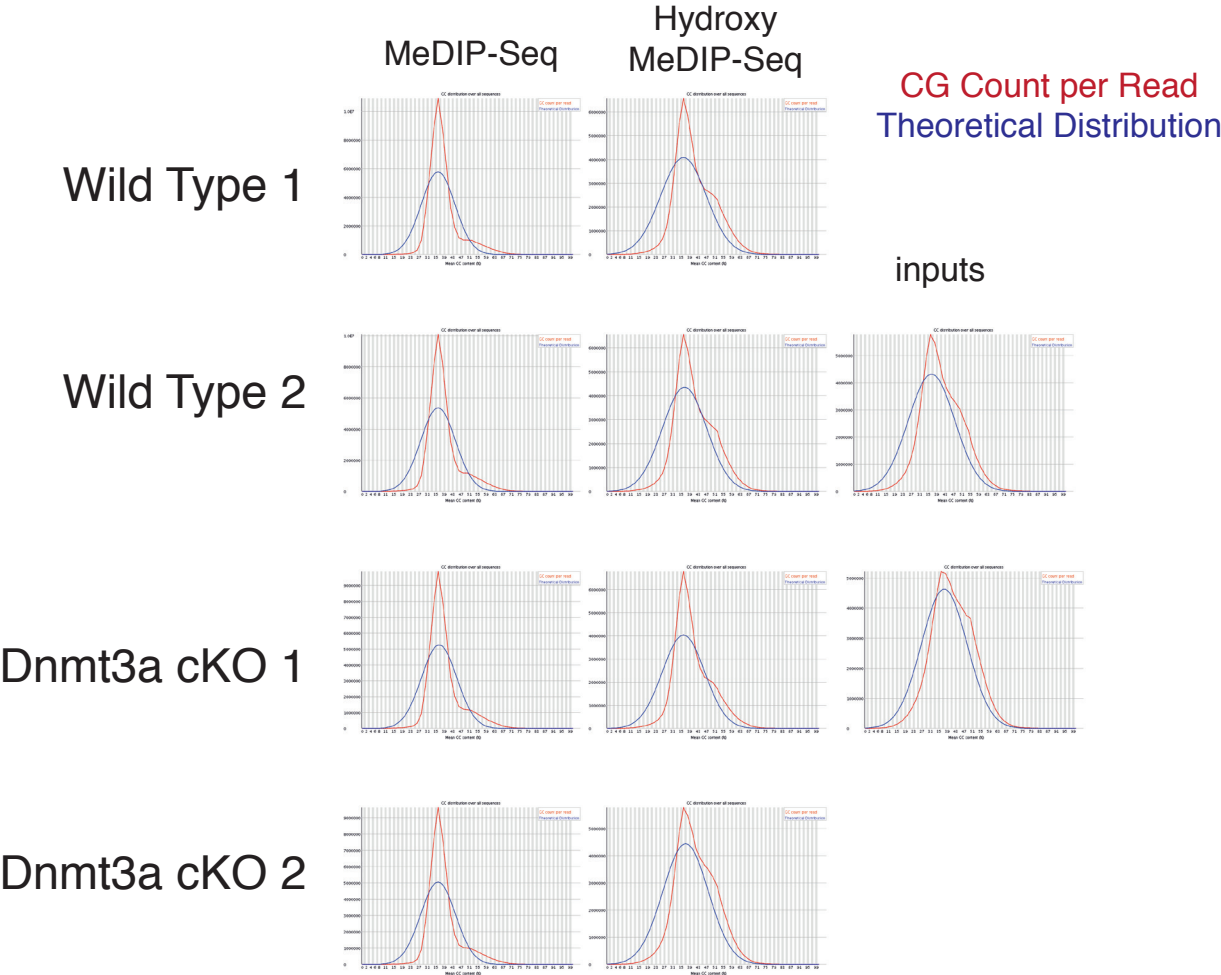

Supplement: supp [file elife-21697-supp-v1.zip]

Figure 2 Supplement 1

A

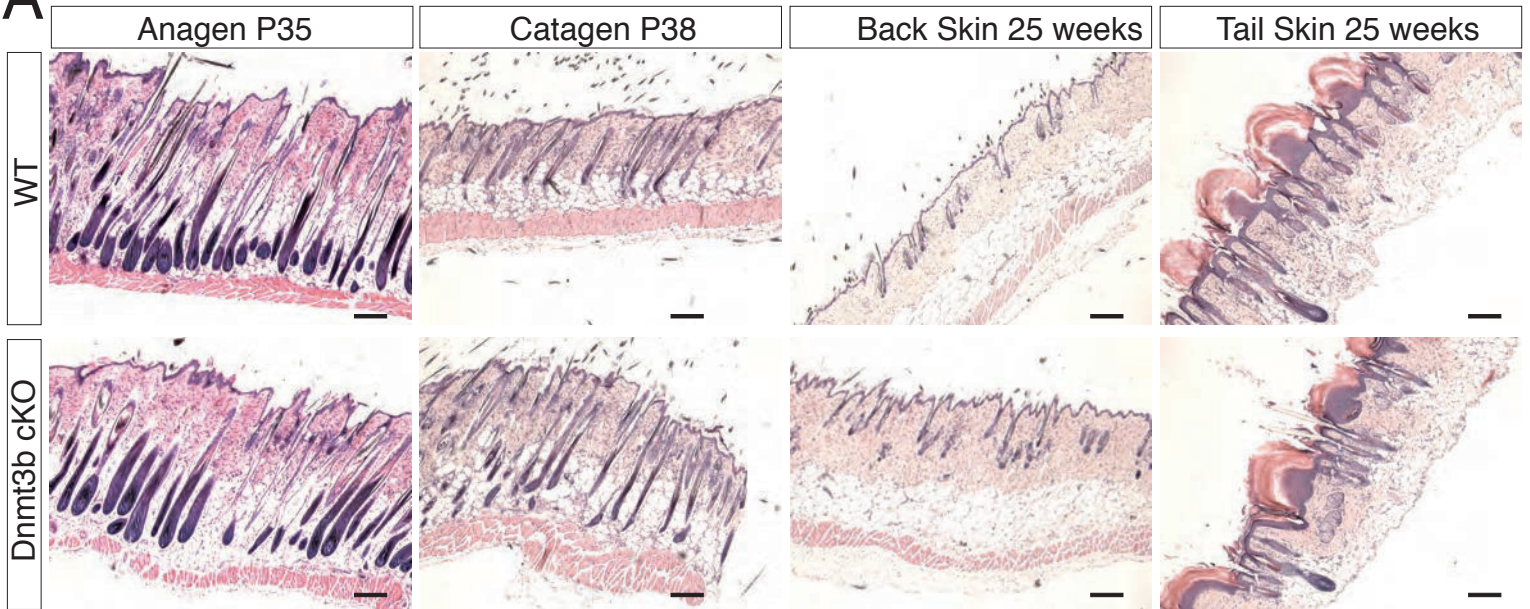

Supplement: supp [file elife-21697-supp-v1.zip]

Figure 2 Supplement 5

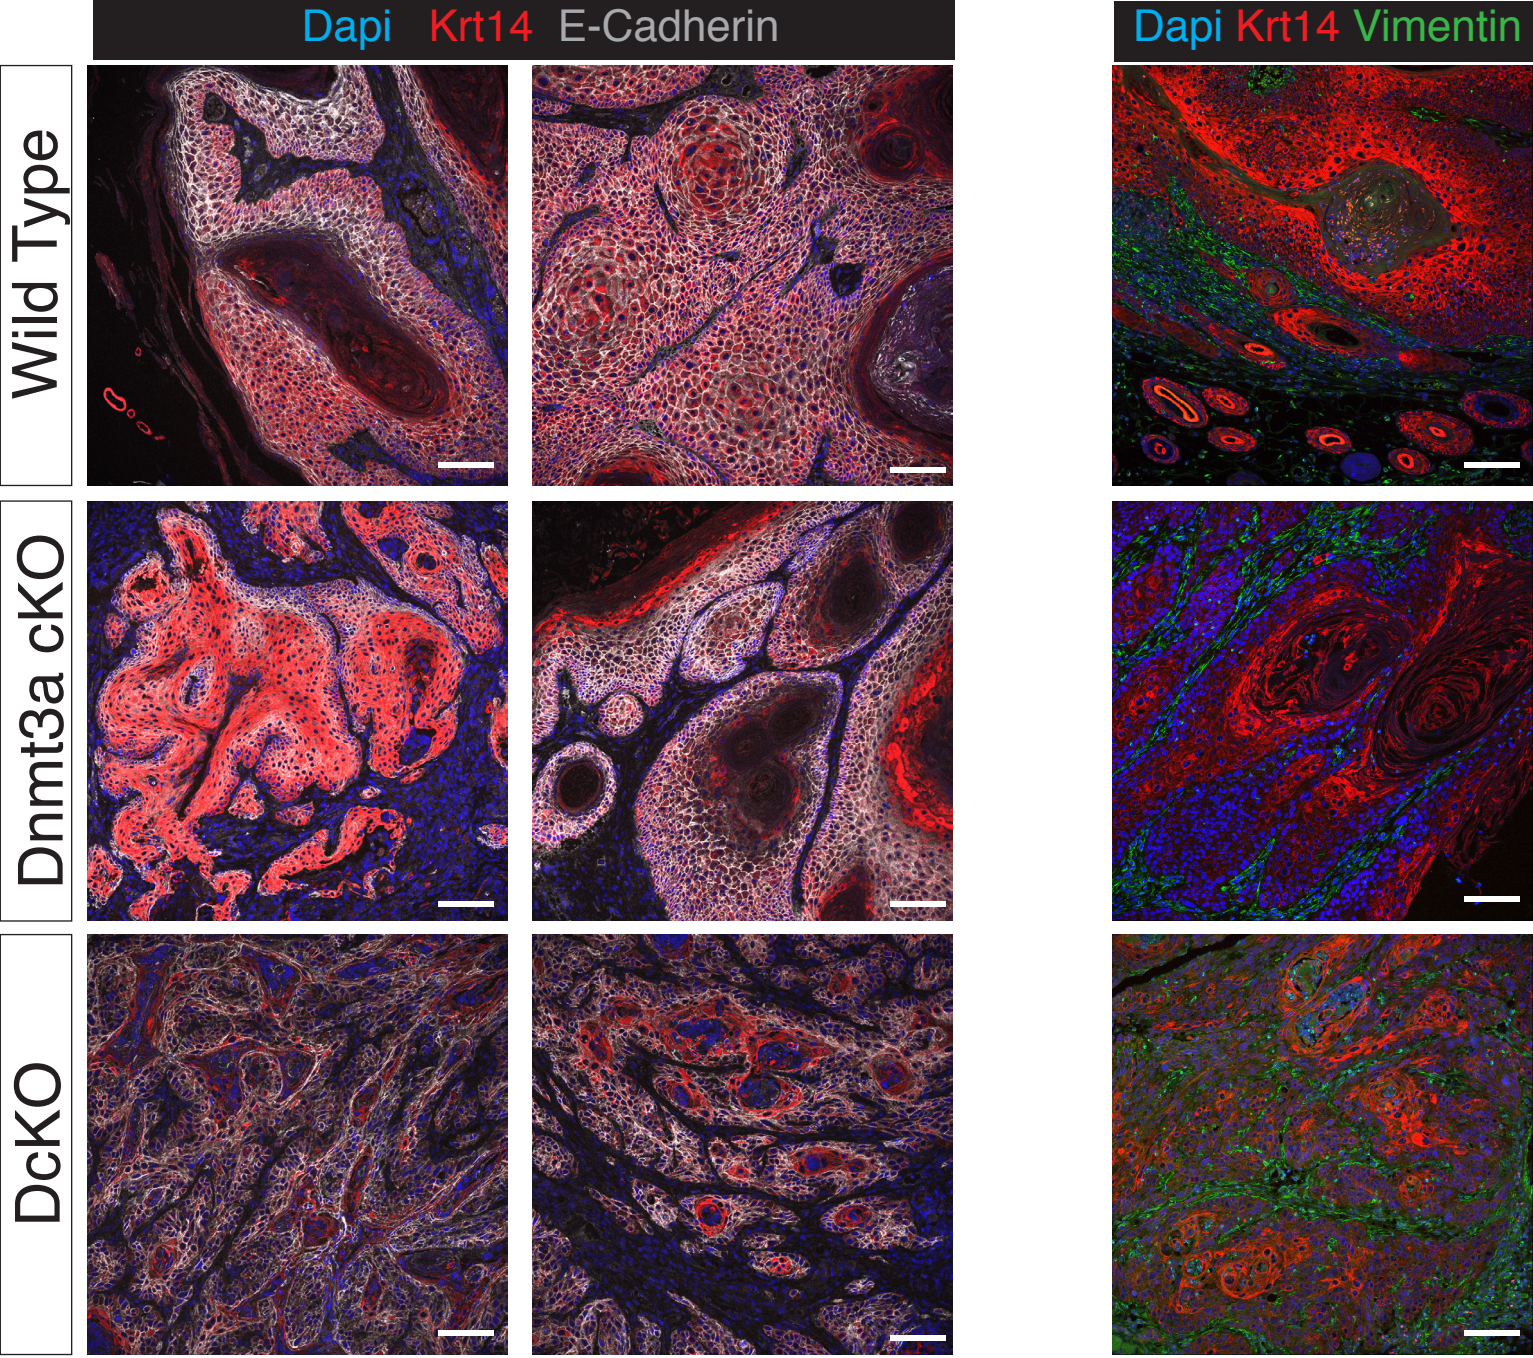

Supplement: supp [file elife-21697-supp-v1.zip]

Figure 2 Supplement 3

A

KI67

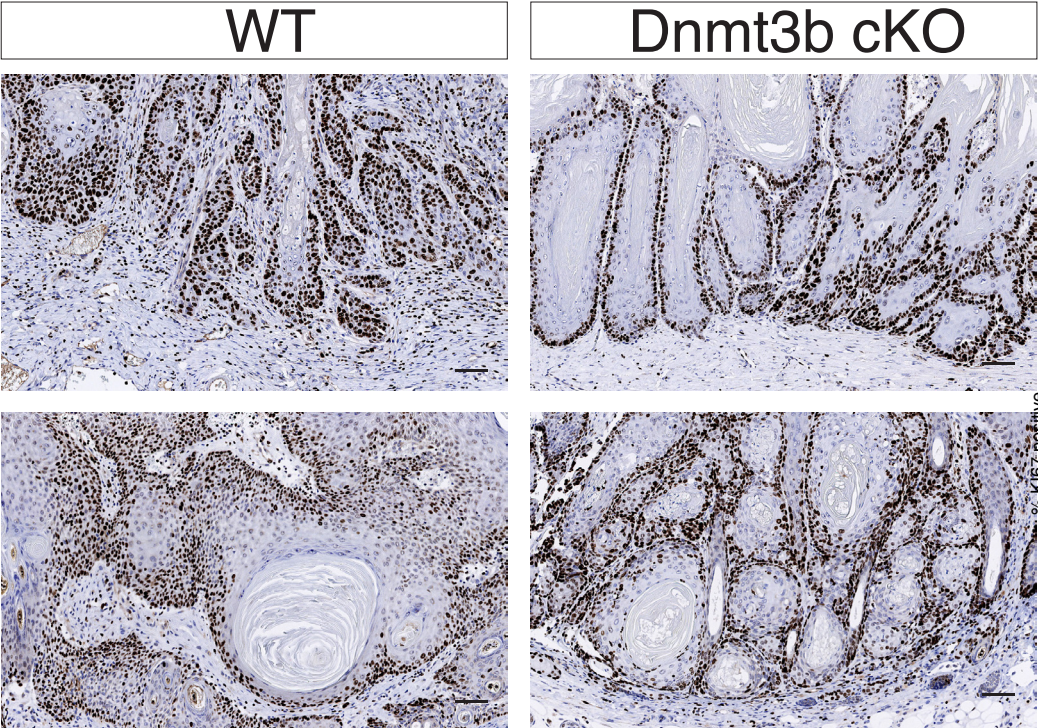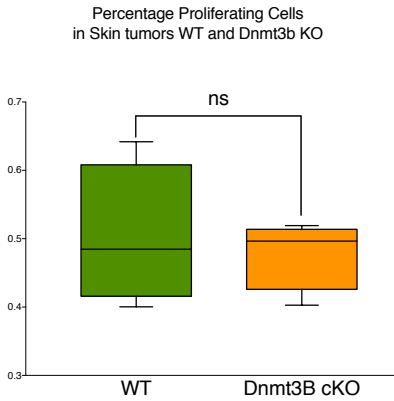

B

Tunel / DAPI

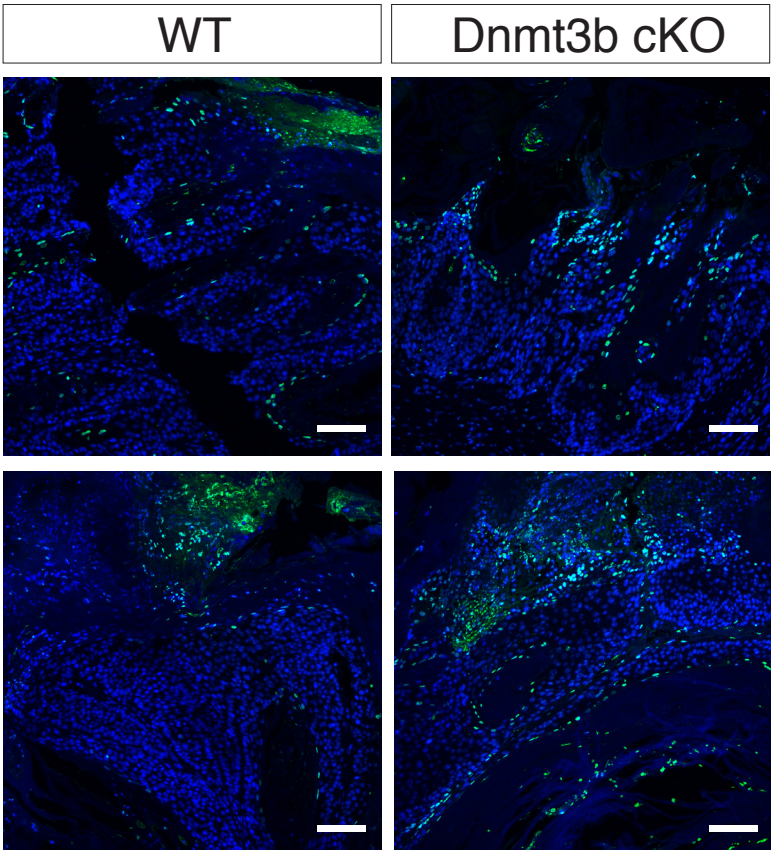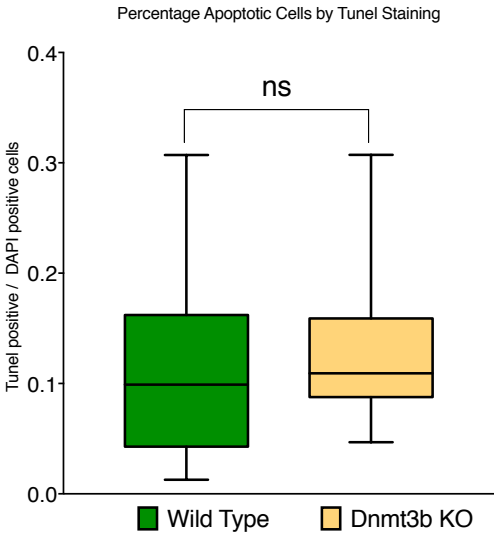

Supplement: supp [file elife-21697-supp-v1.zip]

Figure 3 Supplement 1

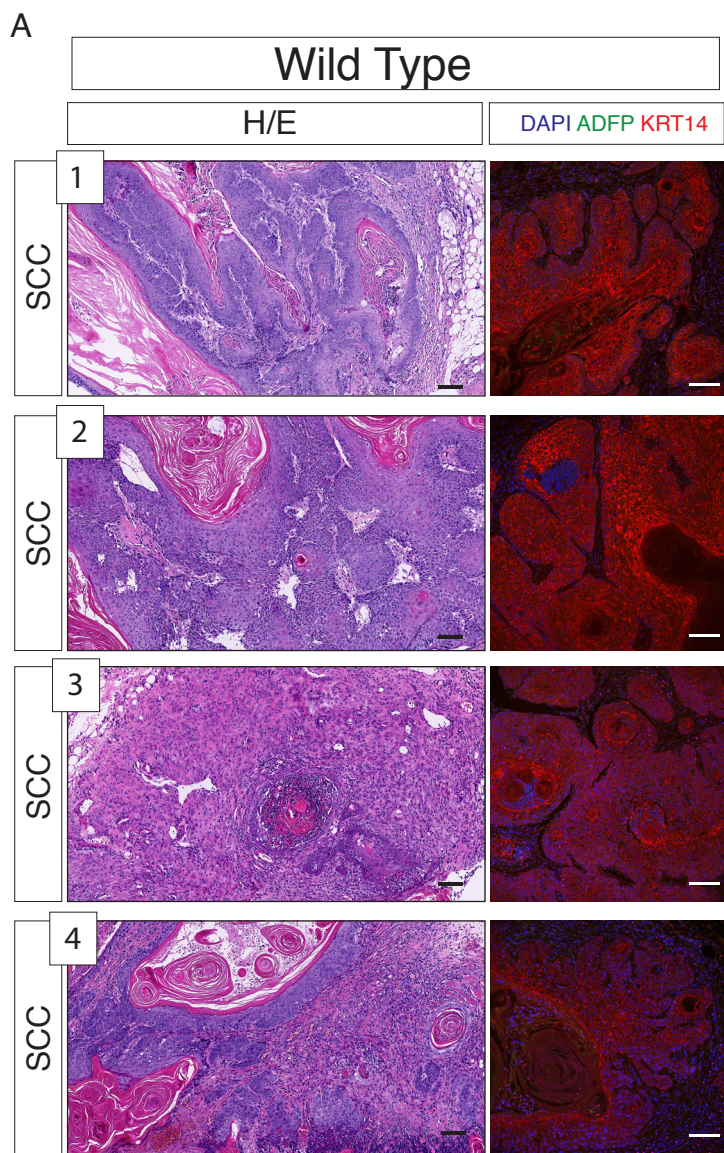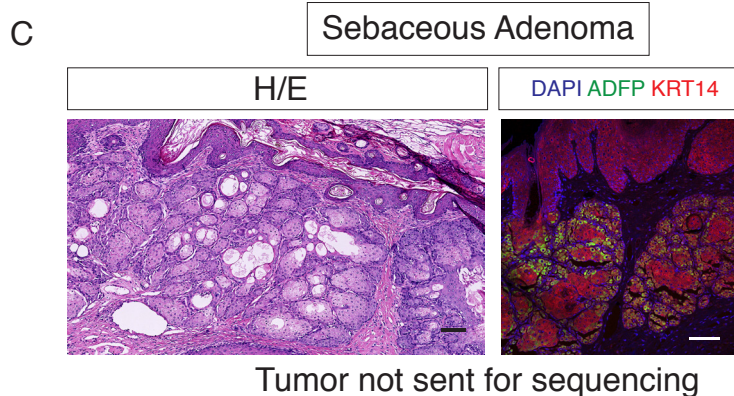

Tumor not sent for sequencing

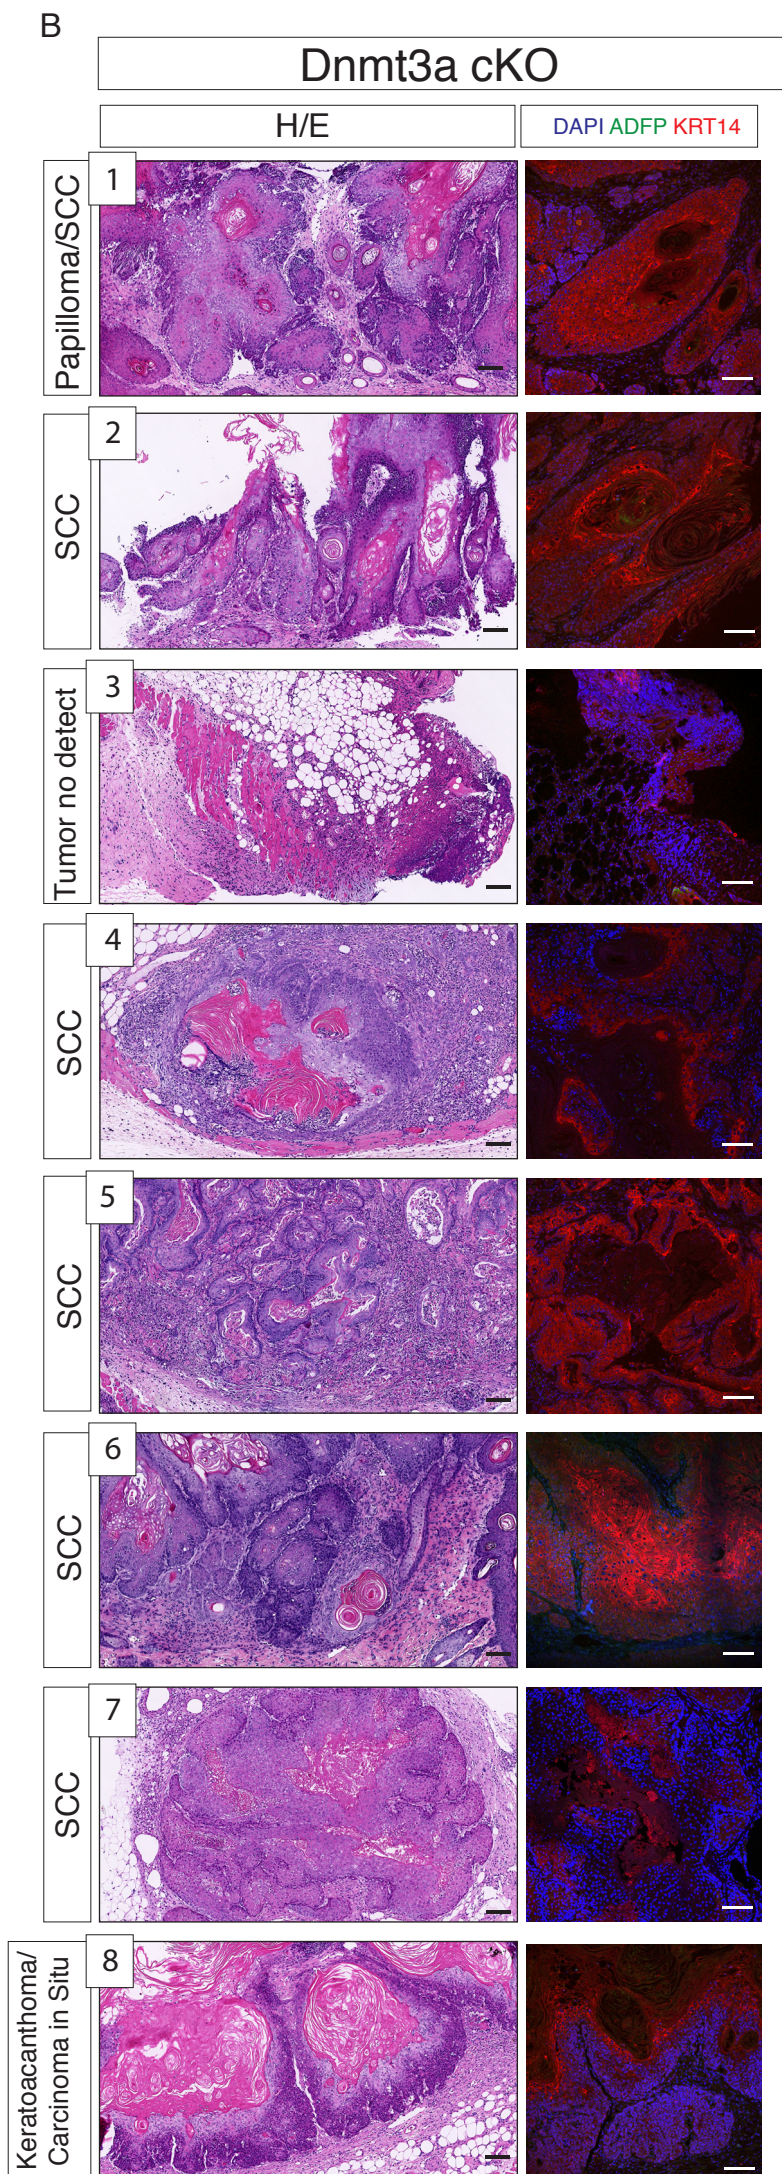

Supplement: supp [file elife-21697-supp-v1.zip]

Figure 3 Supplement 4

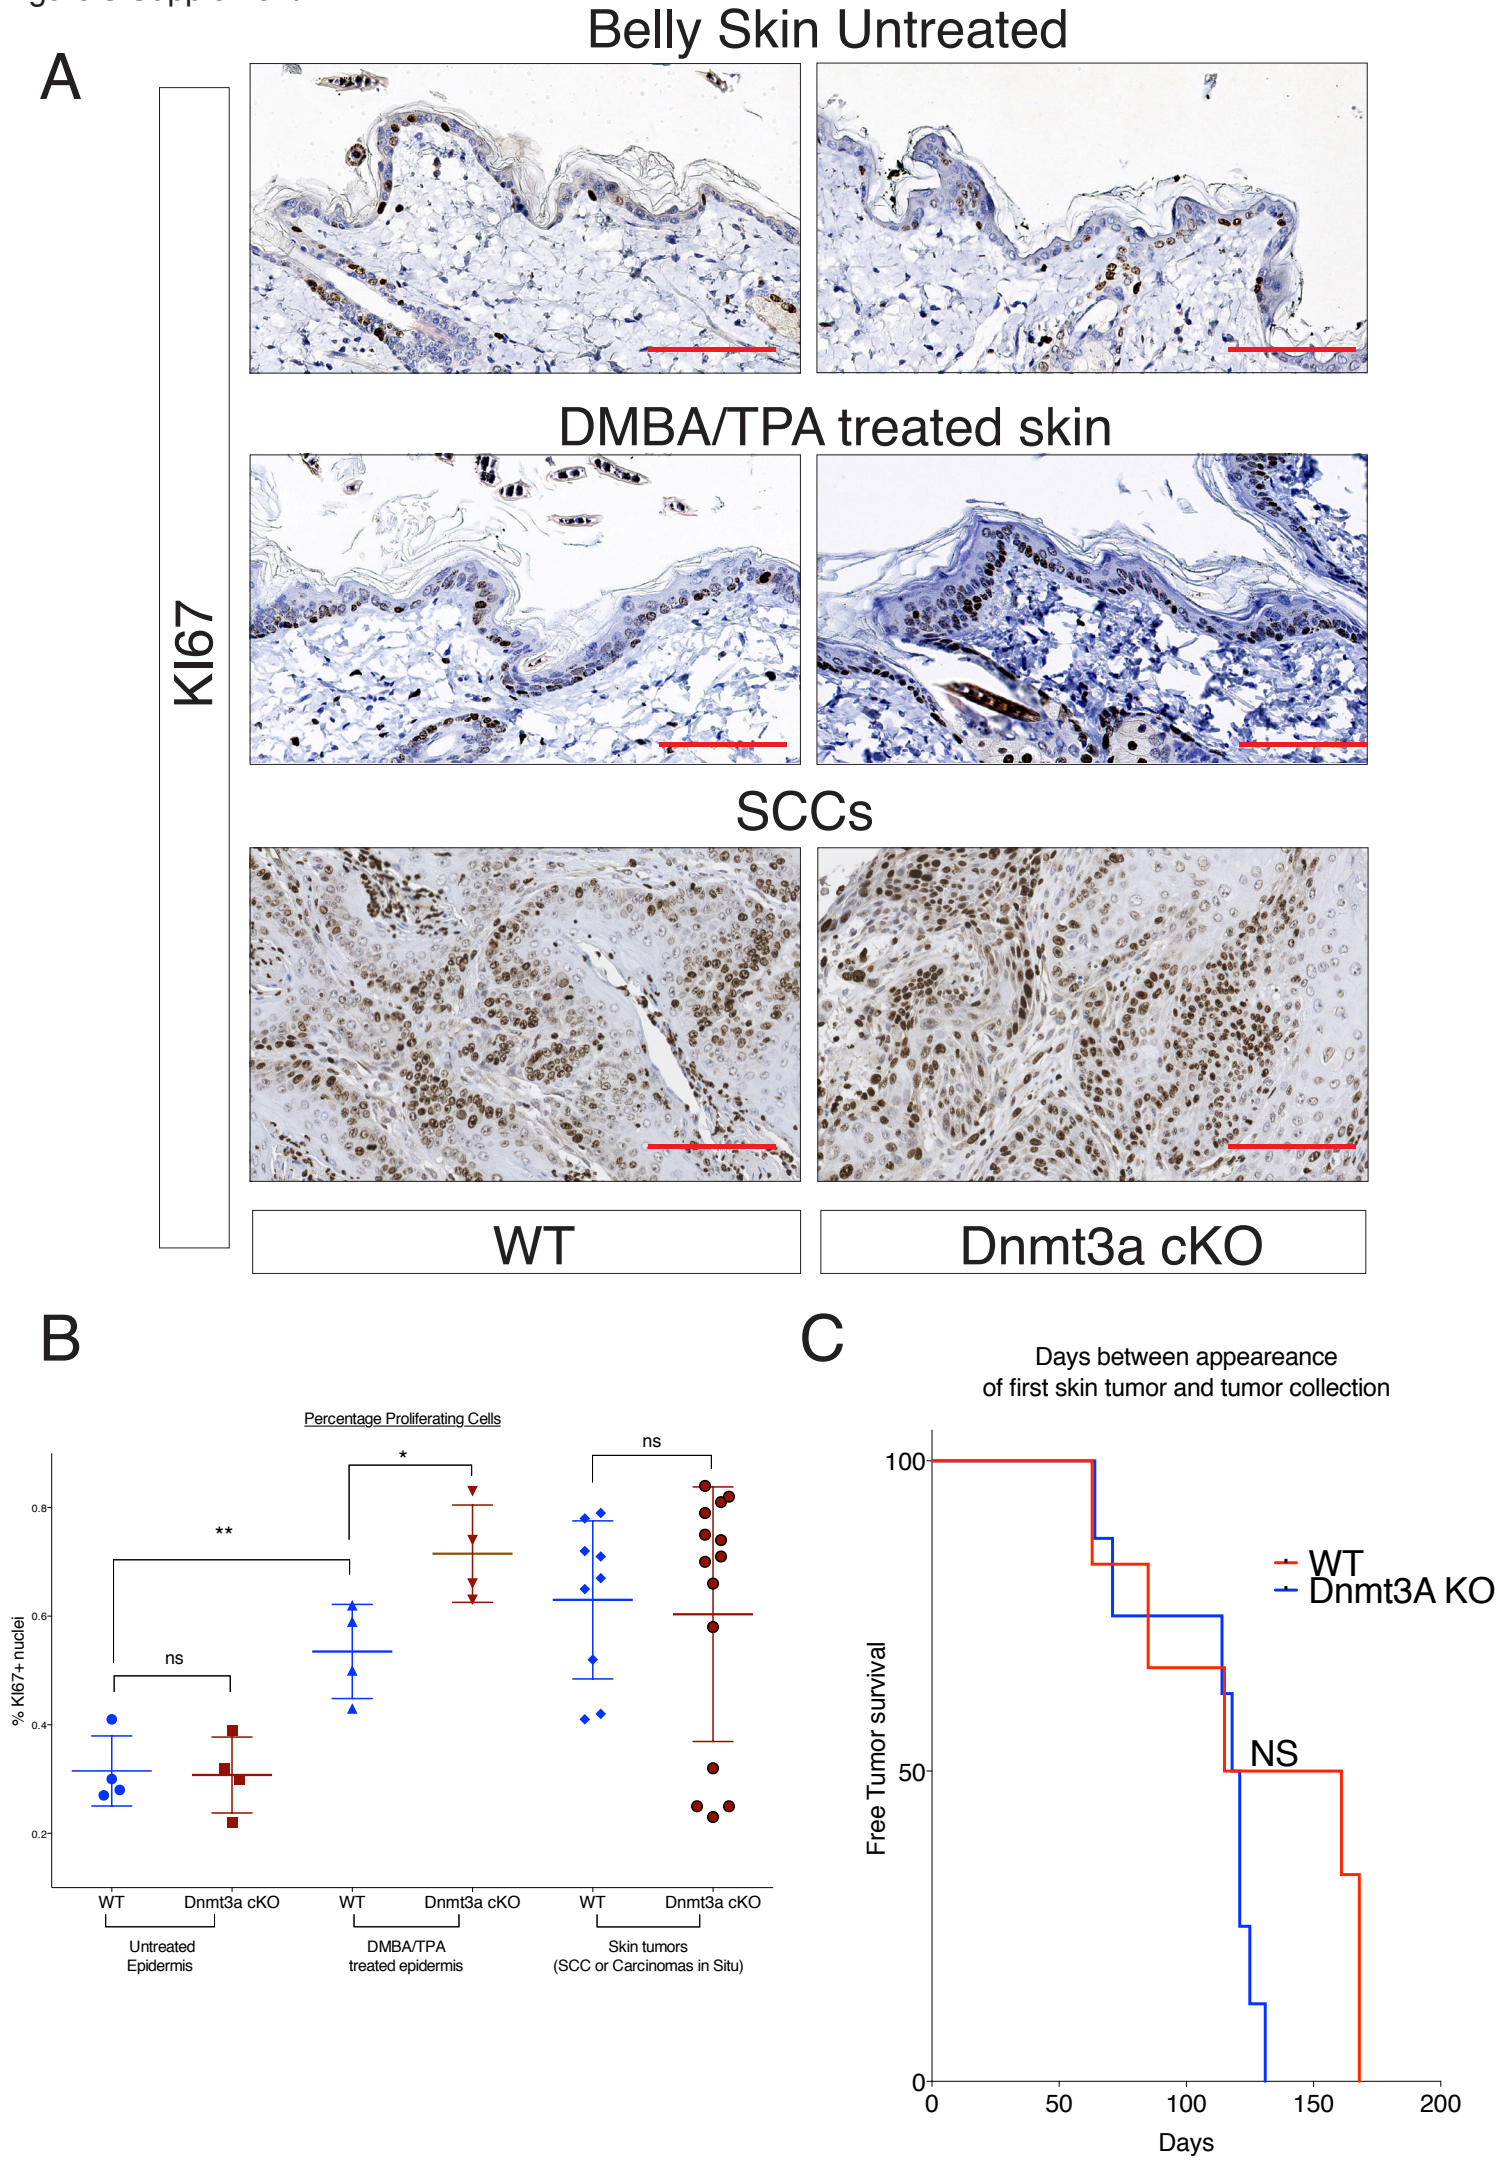

Supplement: supp [file elife-21697-supp-v1.zip]

Figure 3 Supplement 3

A

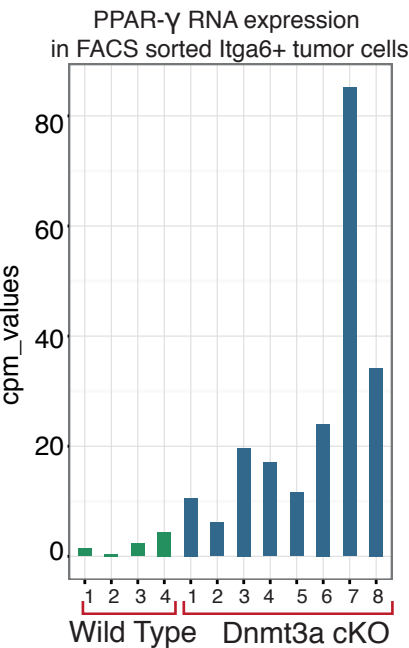

B

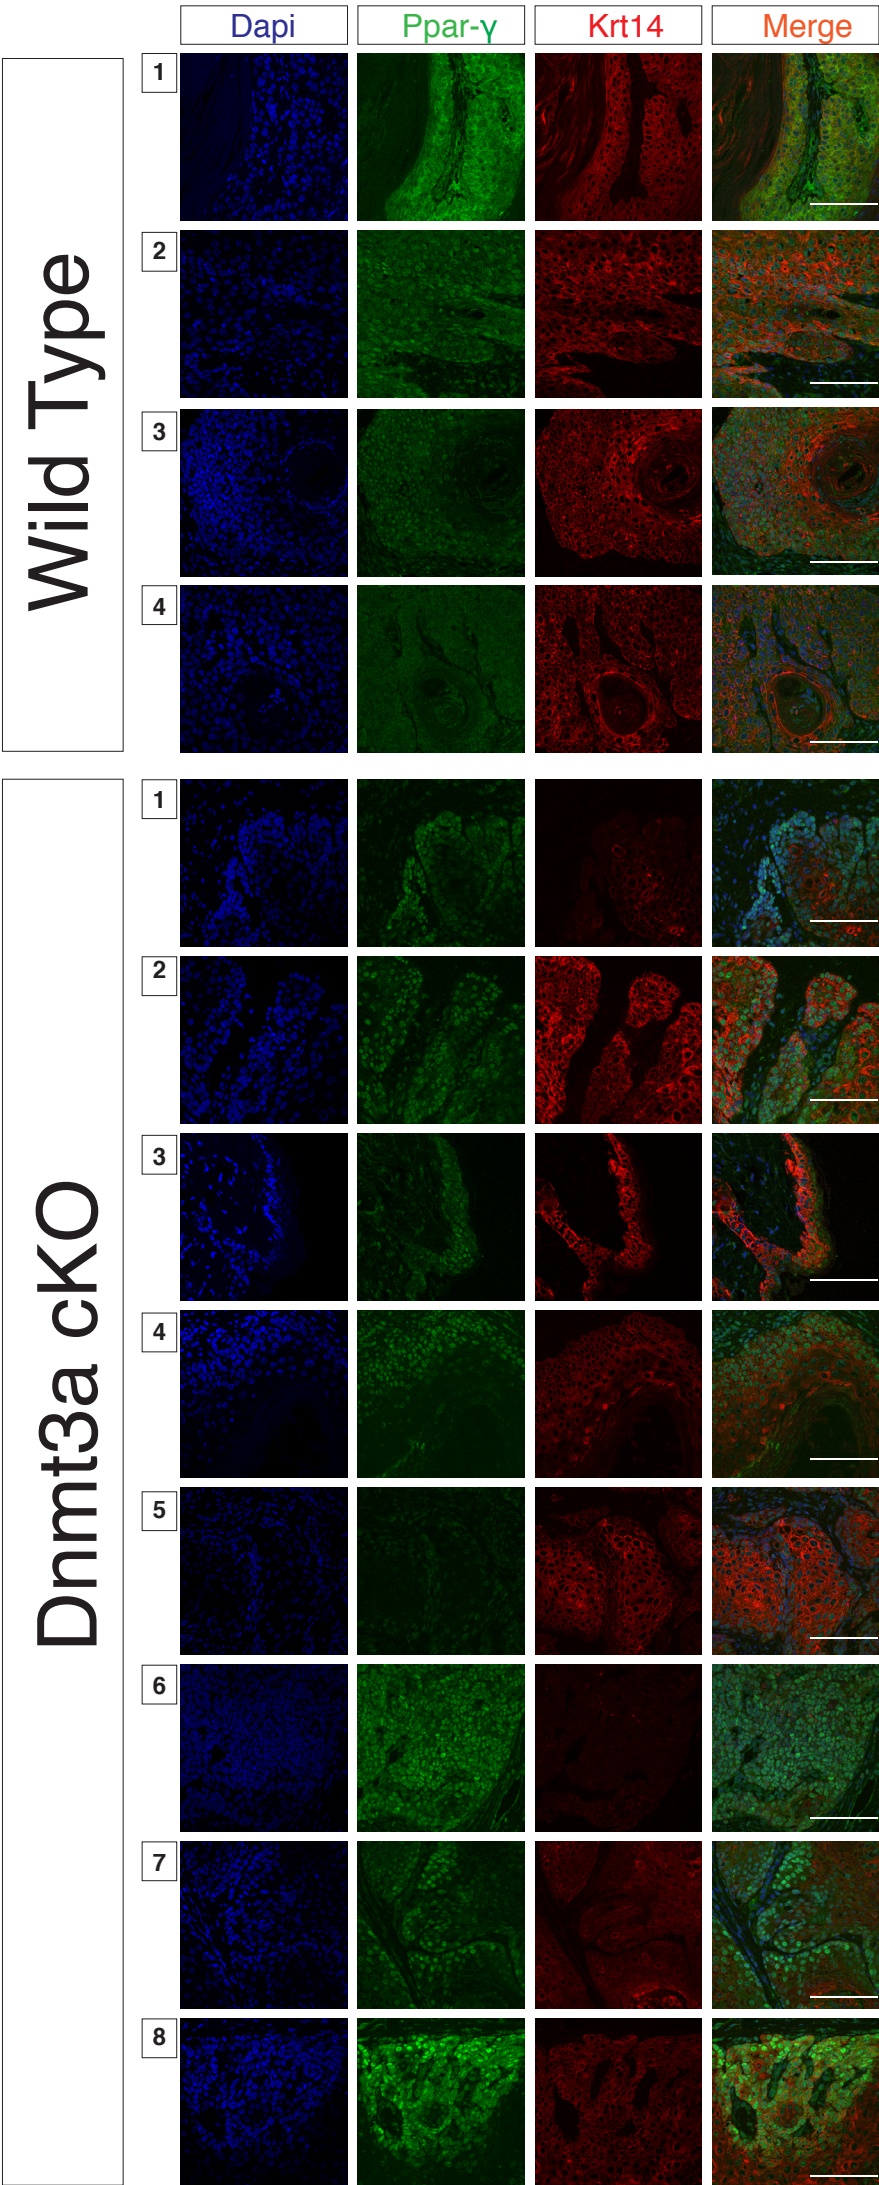

Supplement: supp [file elife-21697-supp-v1.zip]

Figure 1 Supplement 1

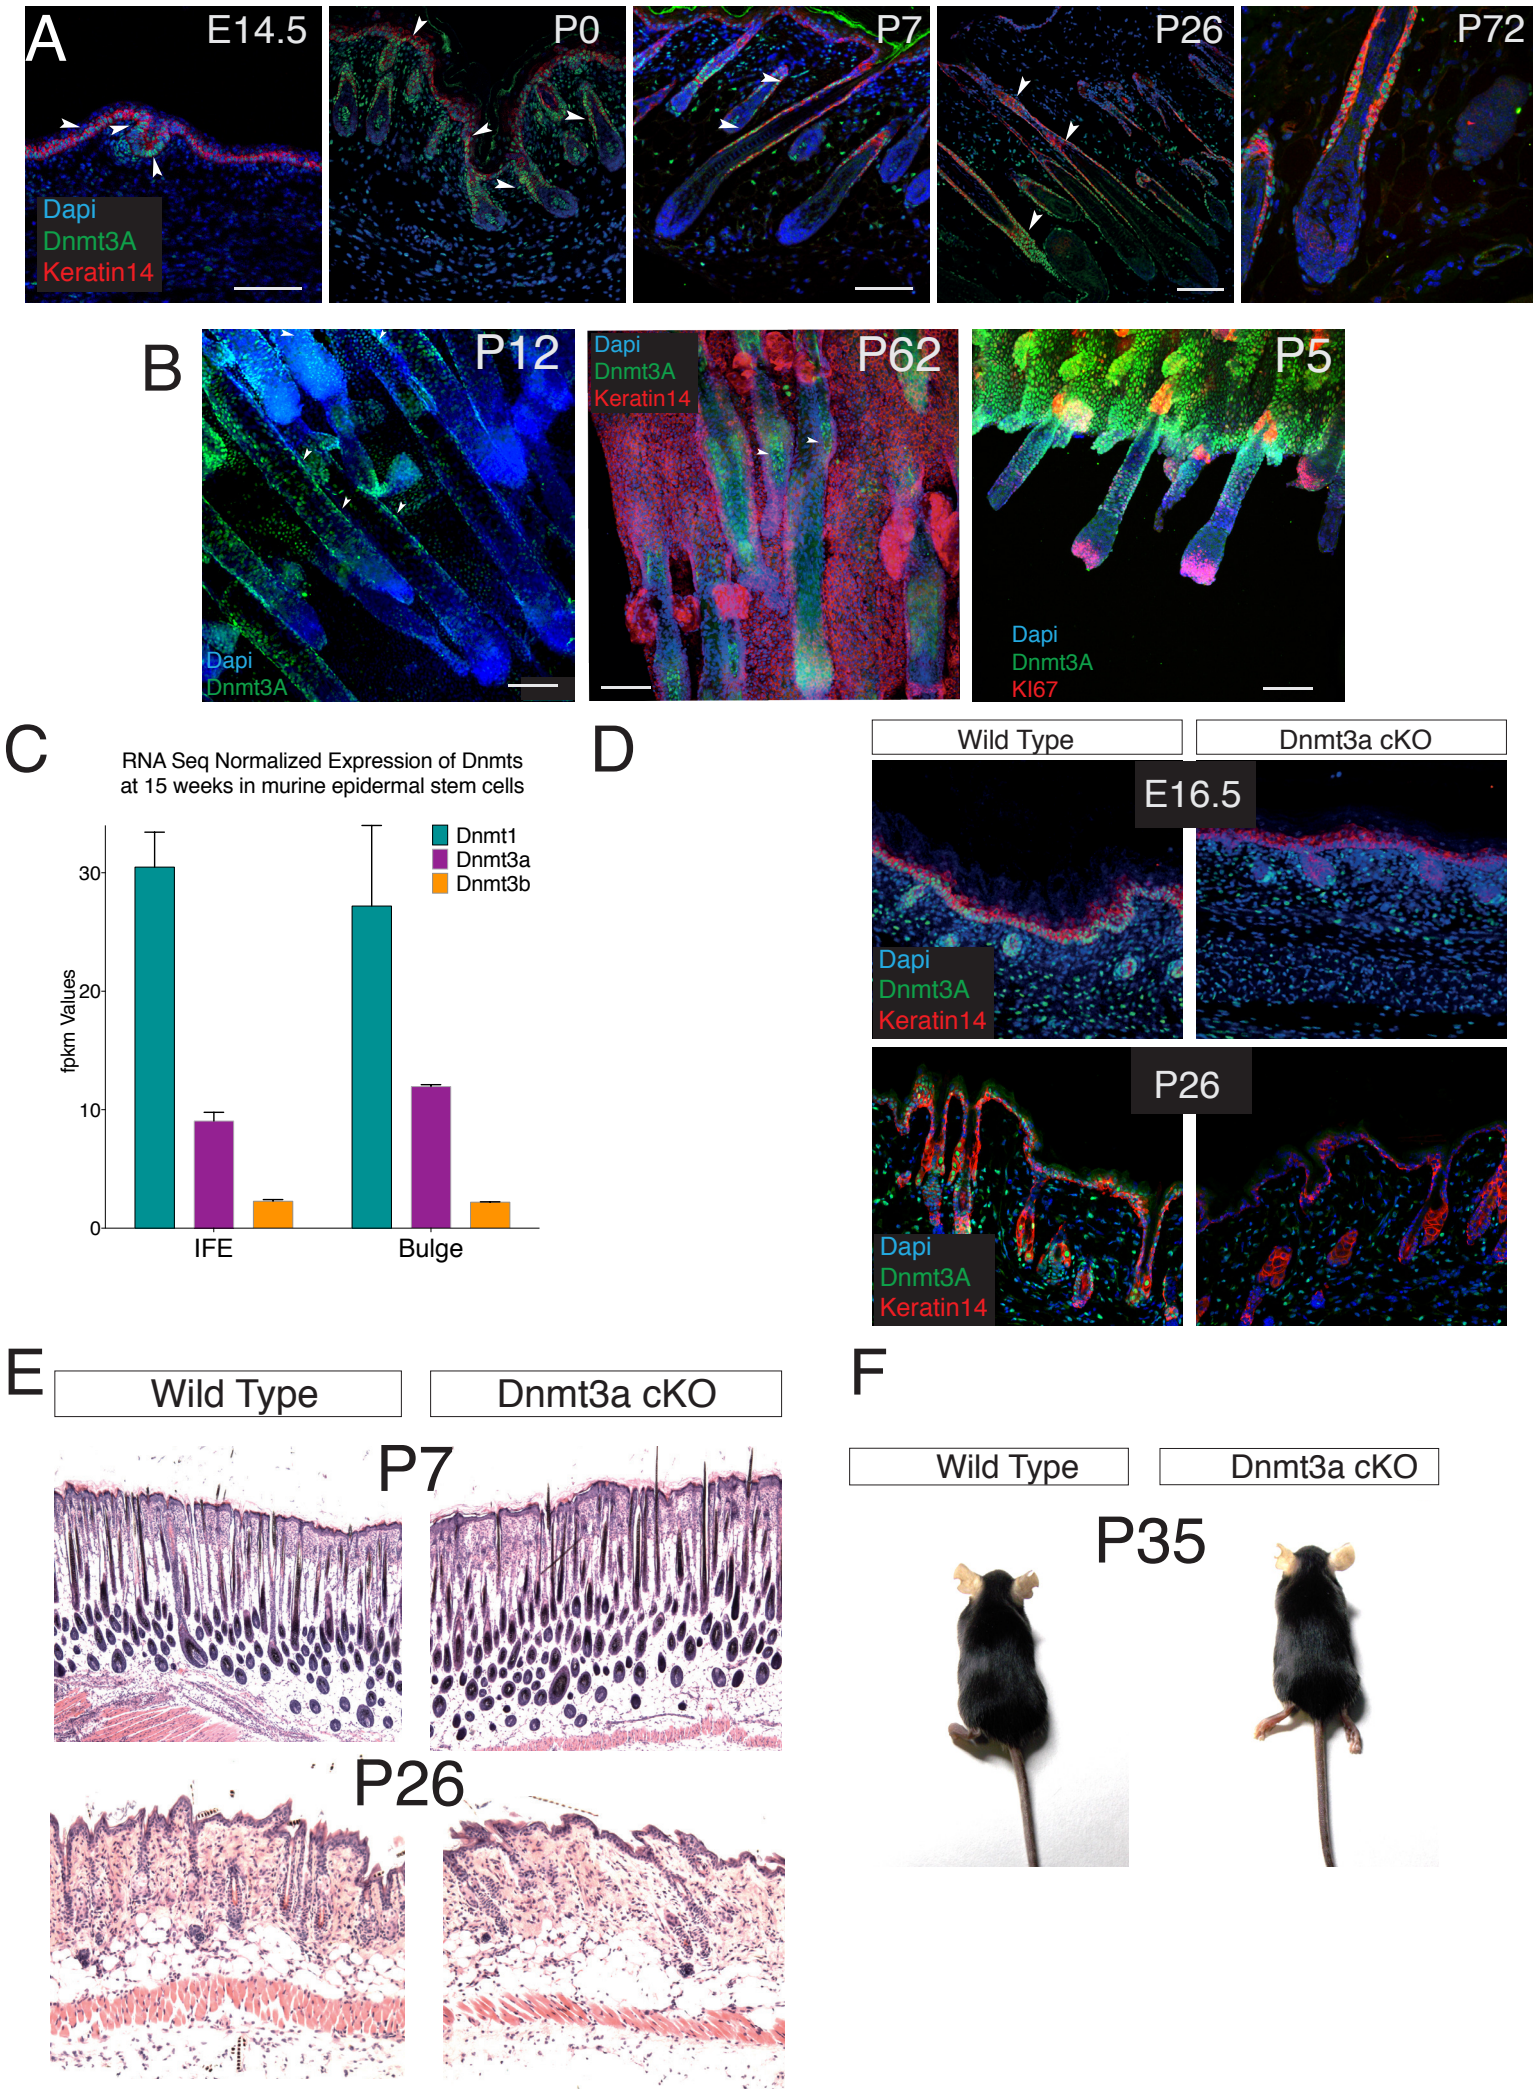

Supplement: supp [file elife-21697-supp-v1.zip]

Figure 2 Supplement 4

A

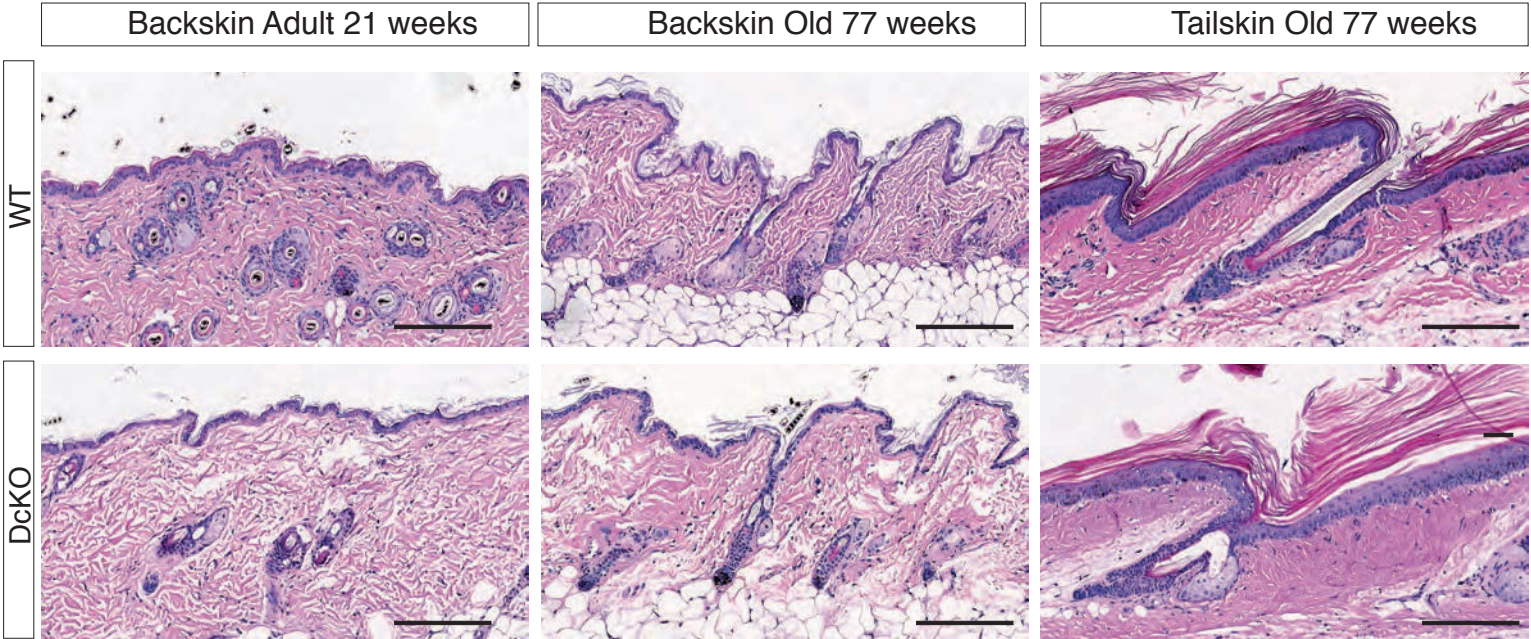

B

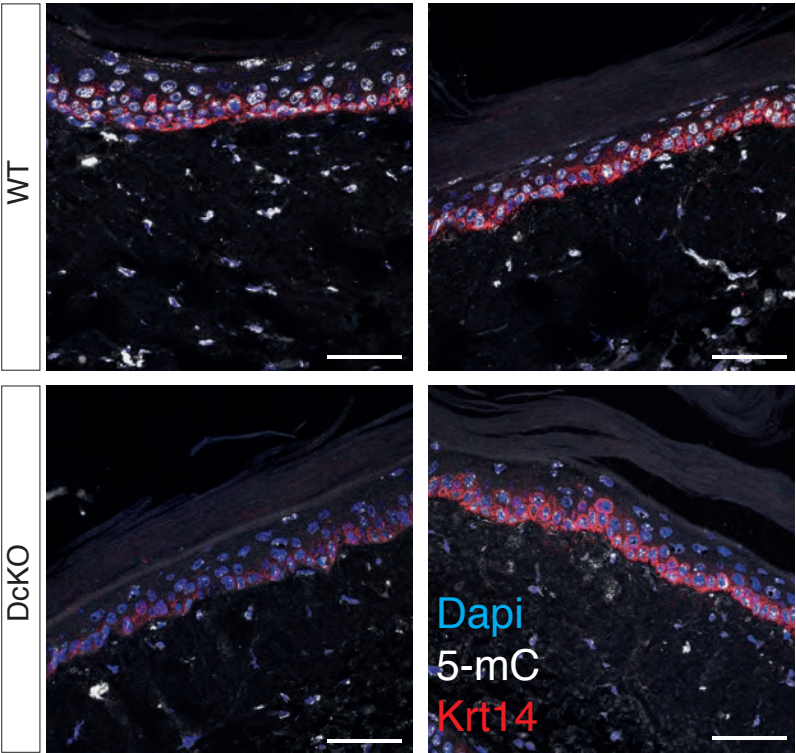

Supplement: supp [file elife-21697-supp-v1.zip]

Figure 2 Supplement 6

A

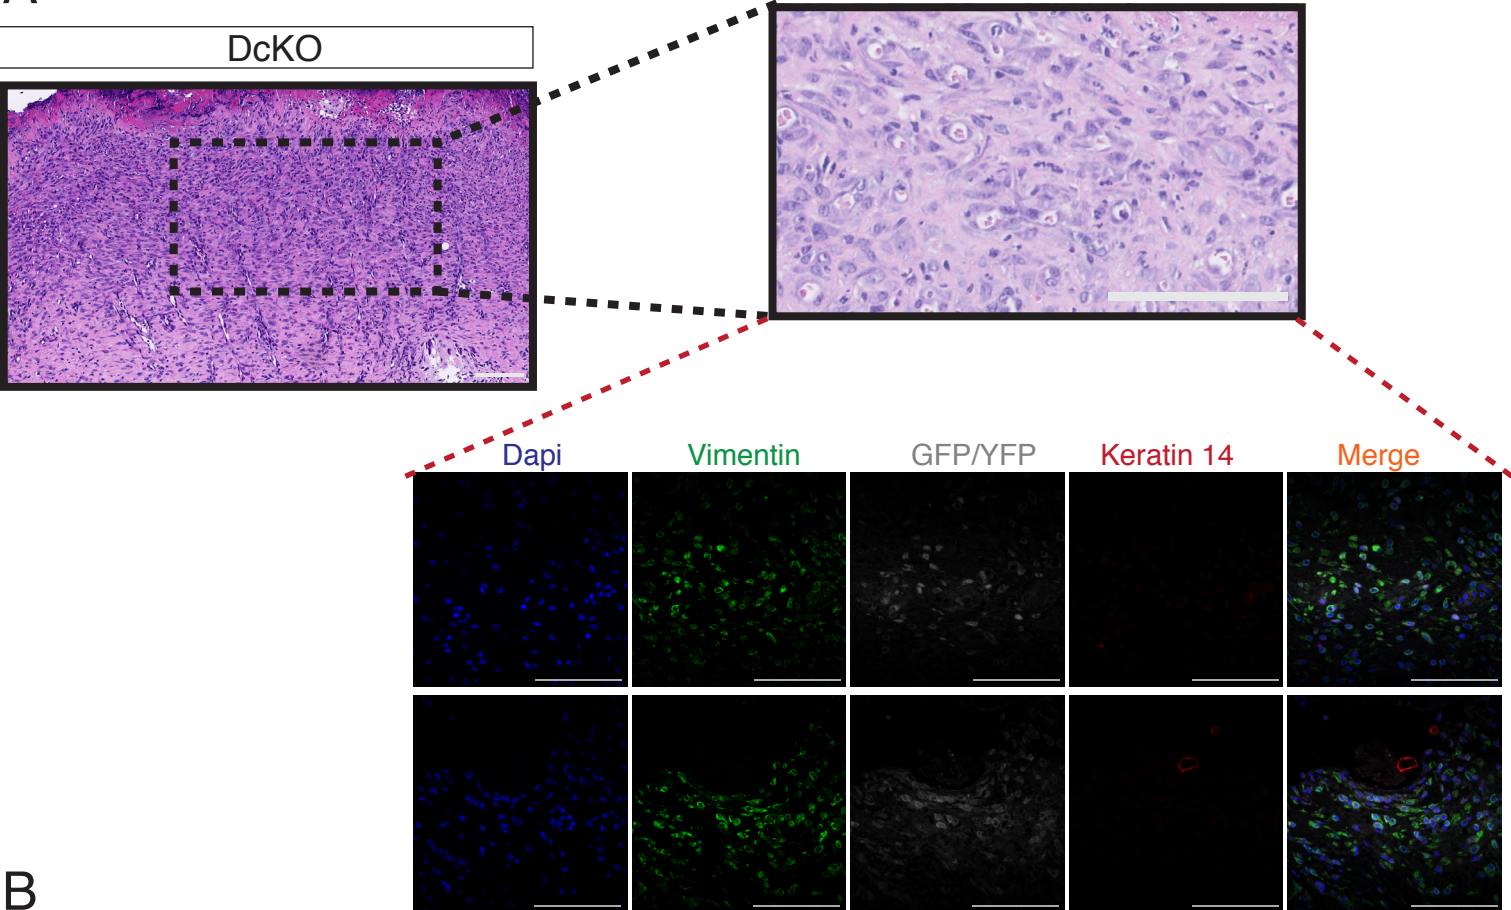

B

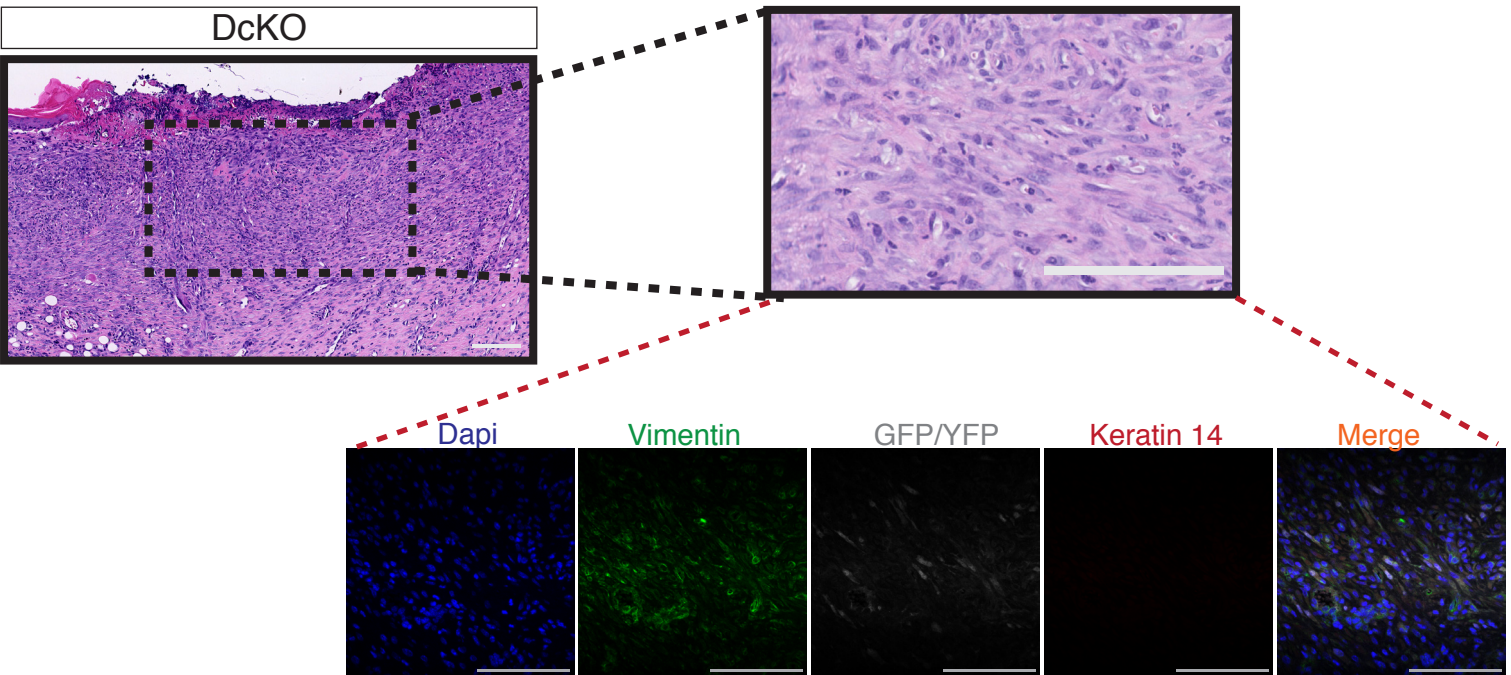

C

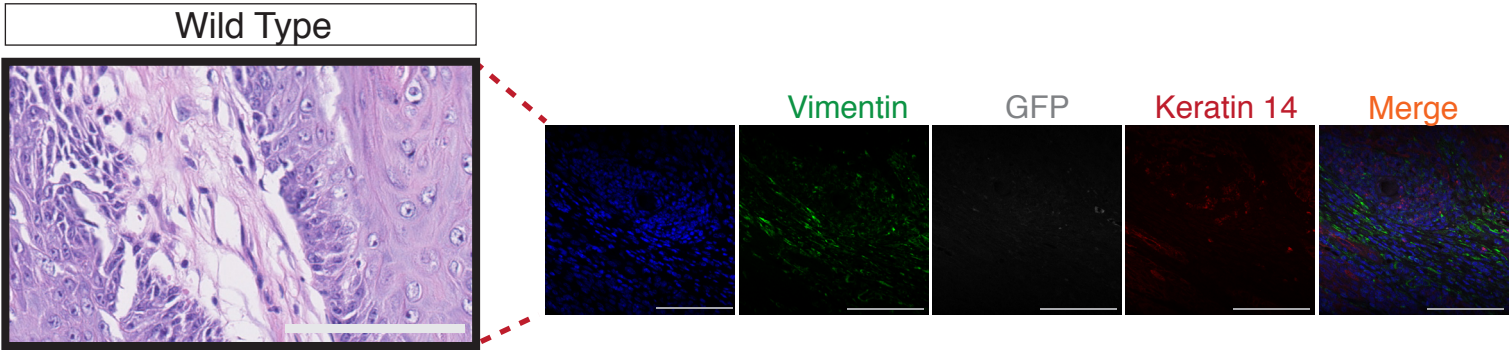

Supplement: supp [file elife-21697-supp-v1.zip]

Figure 3 Supplement 2

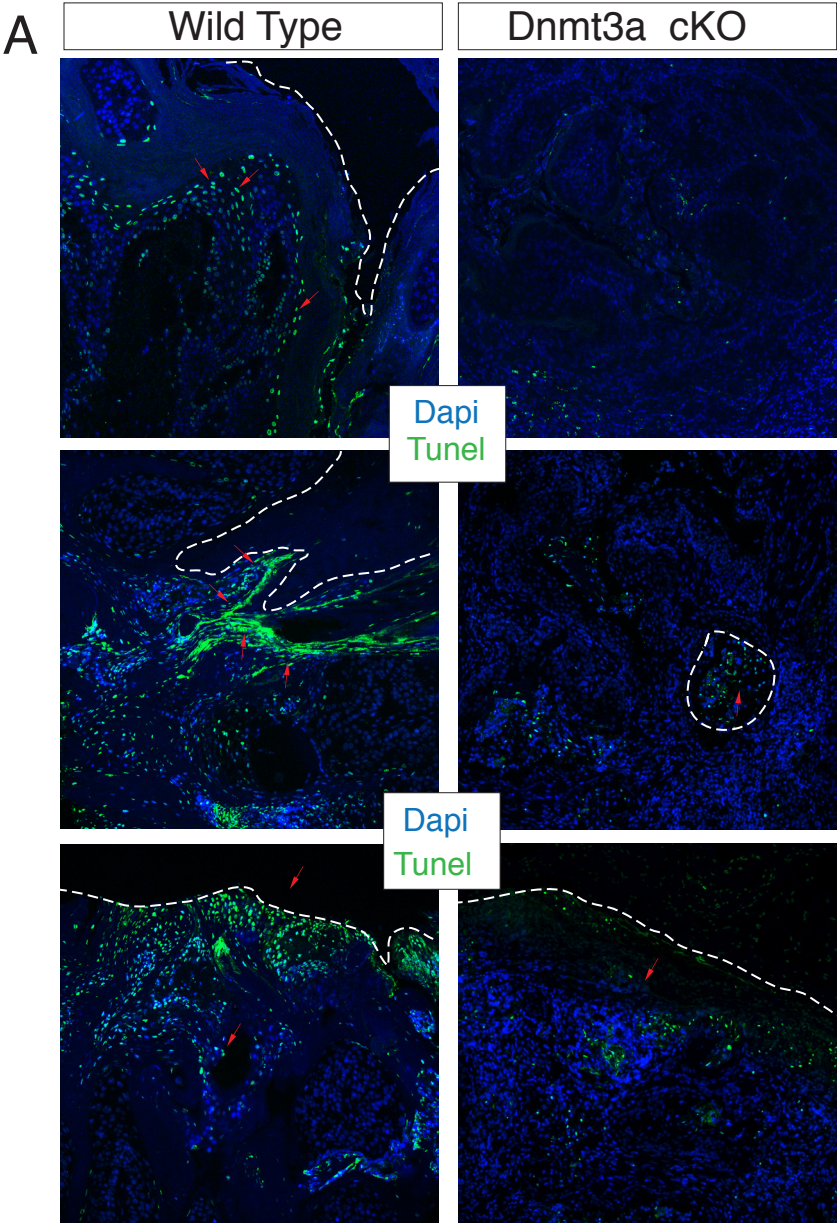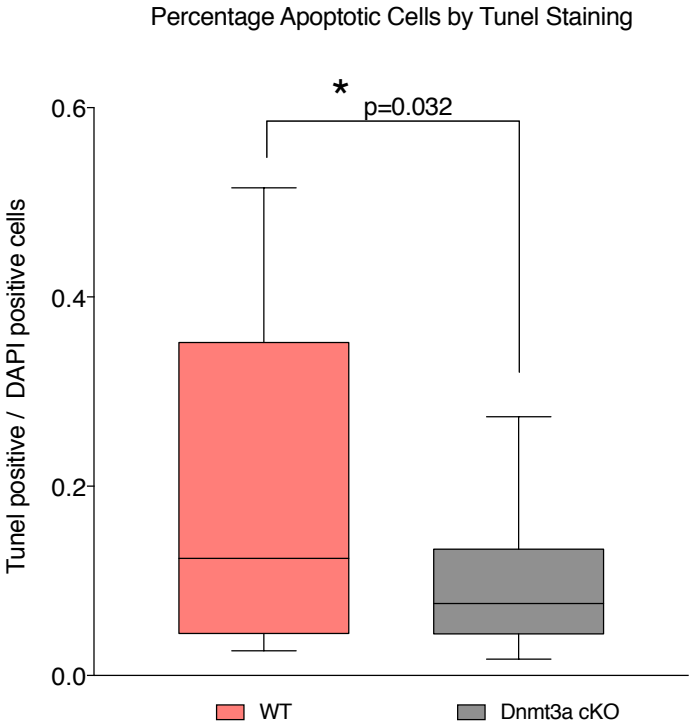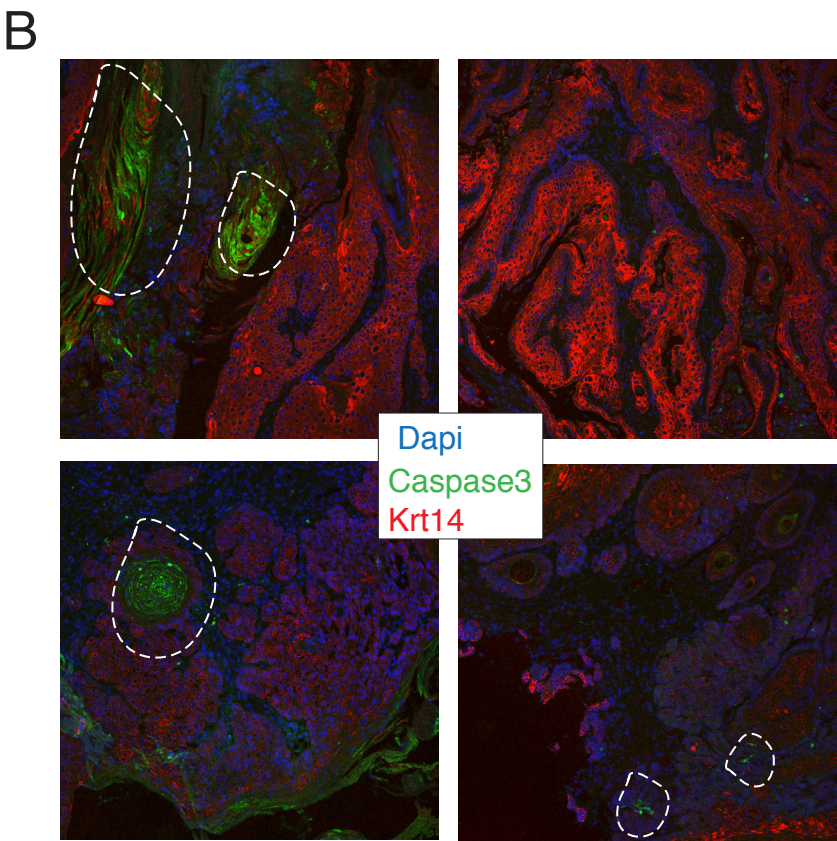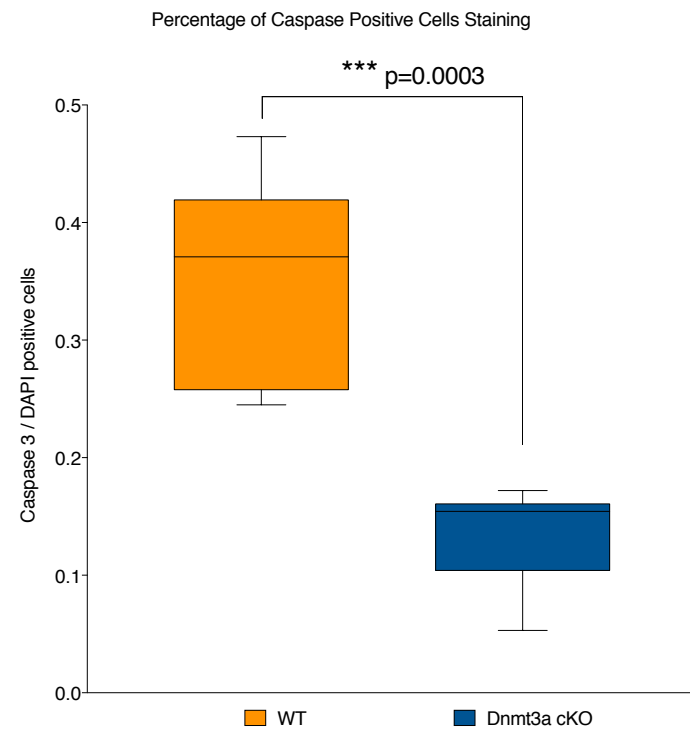

Supplement: supp [file elife-21697-supp-v1.zip]

Figure 4 Supplement 1

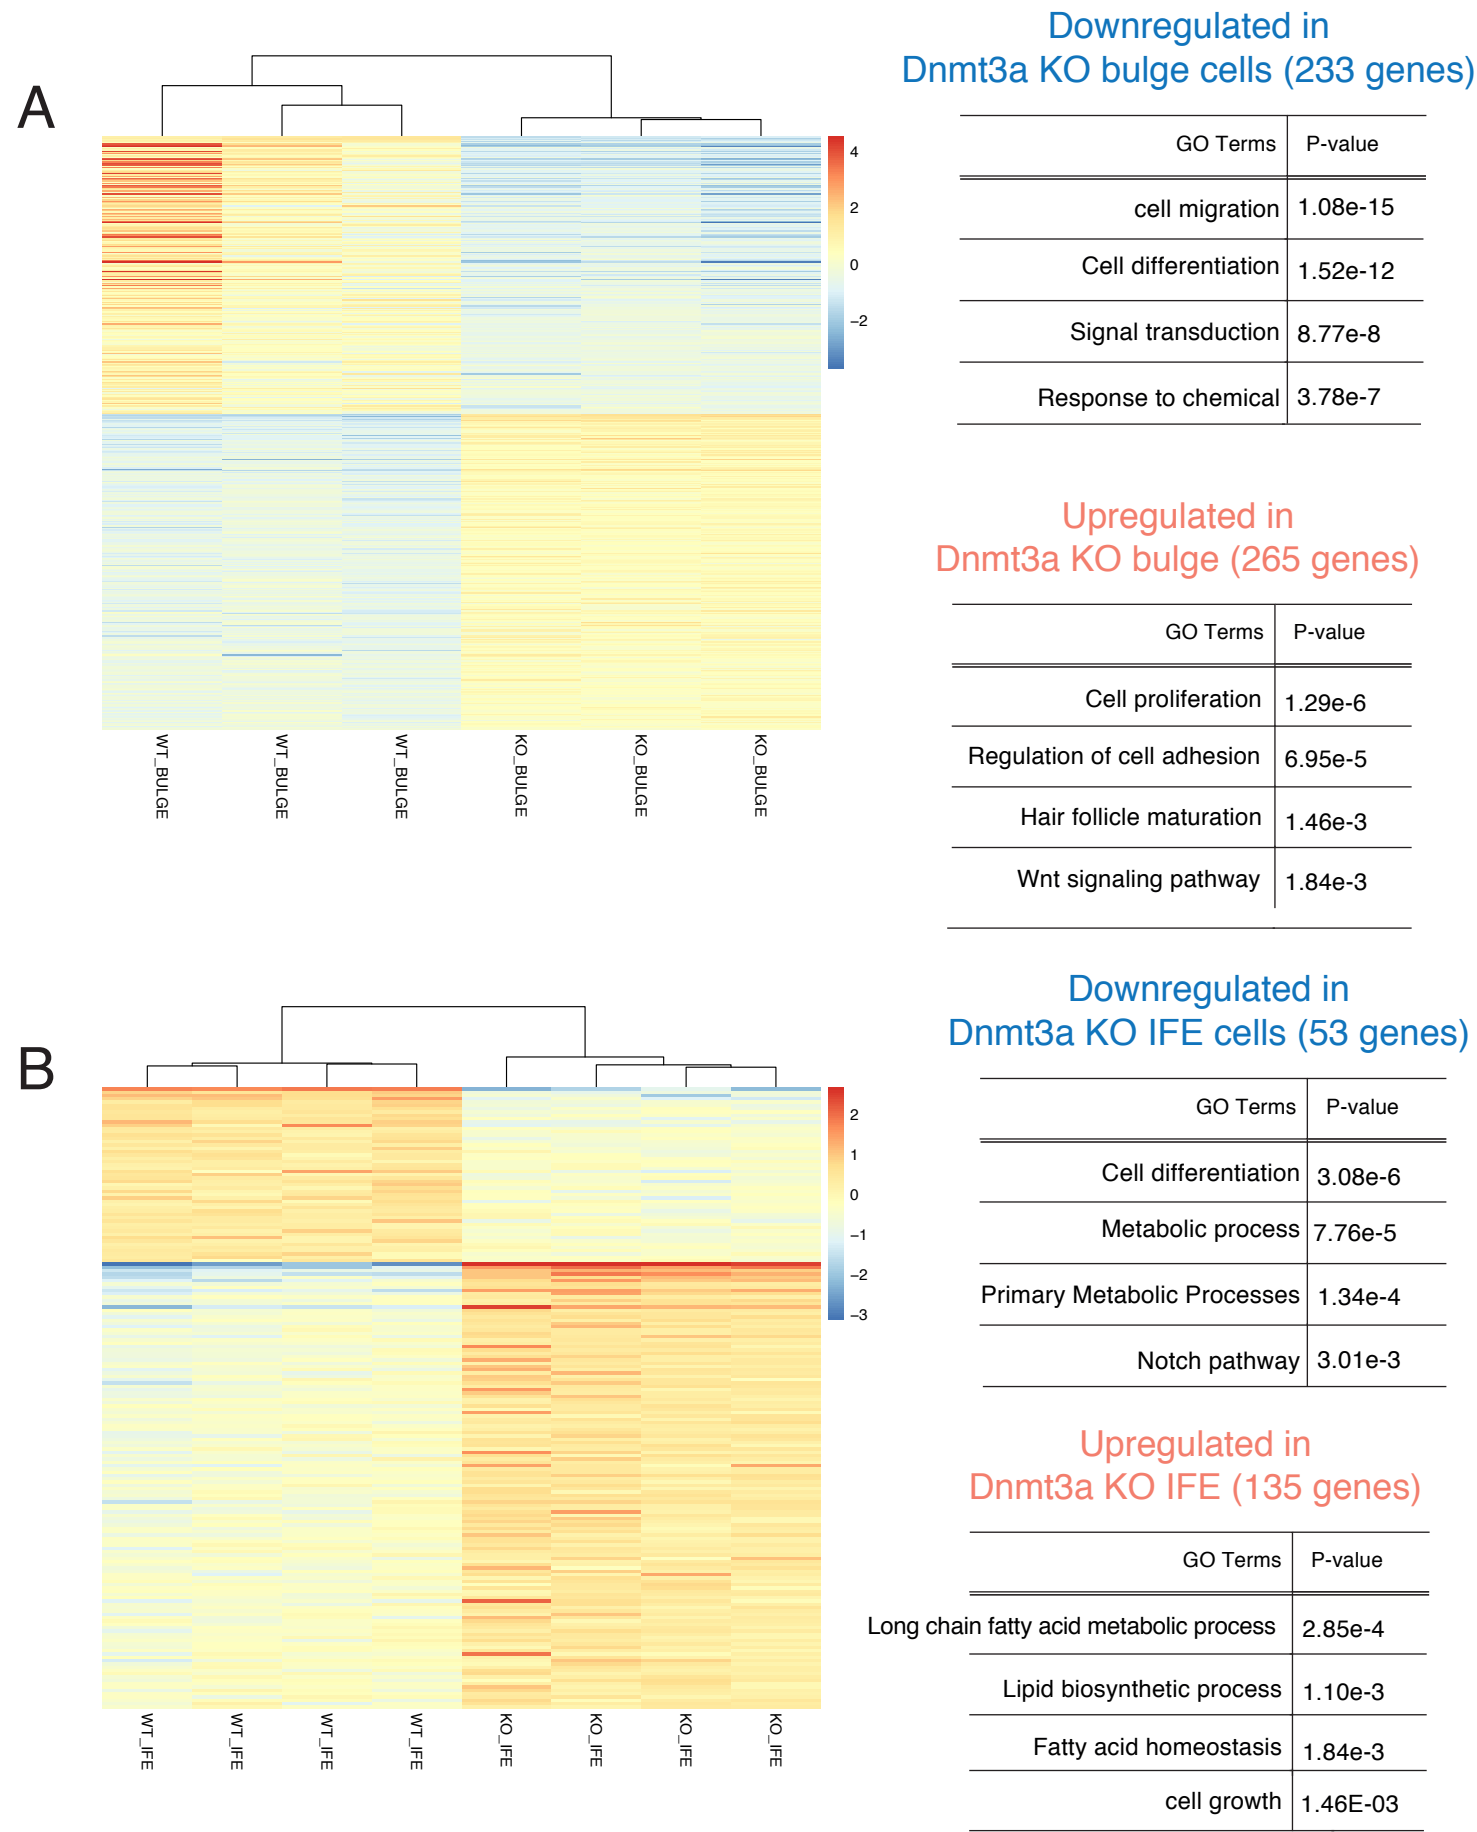

Supplement: supp [file elife-21697-supp-v1.zip]

Figure 7 Supplement 1

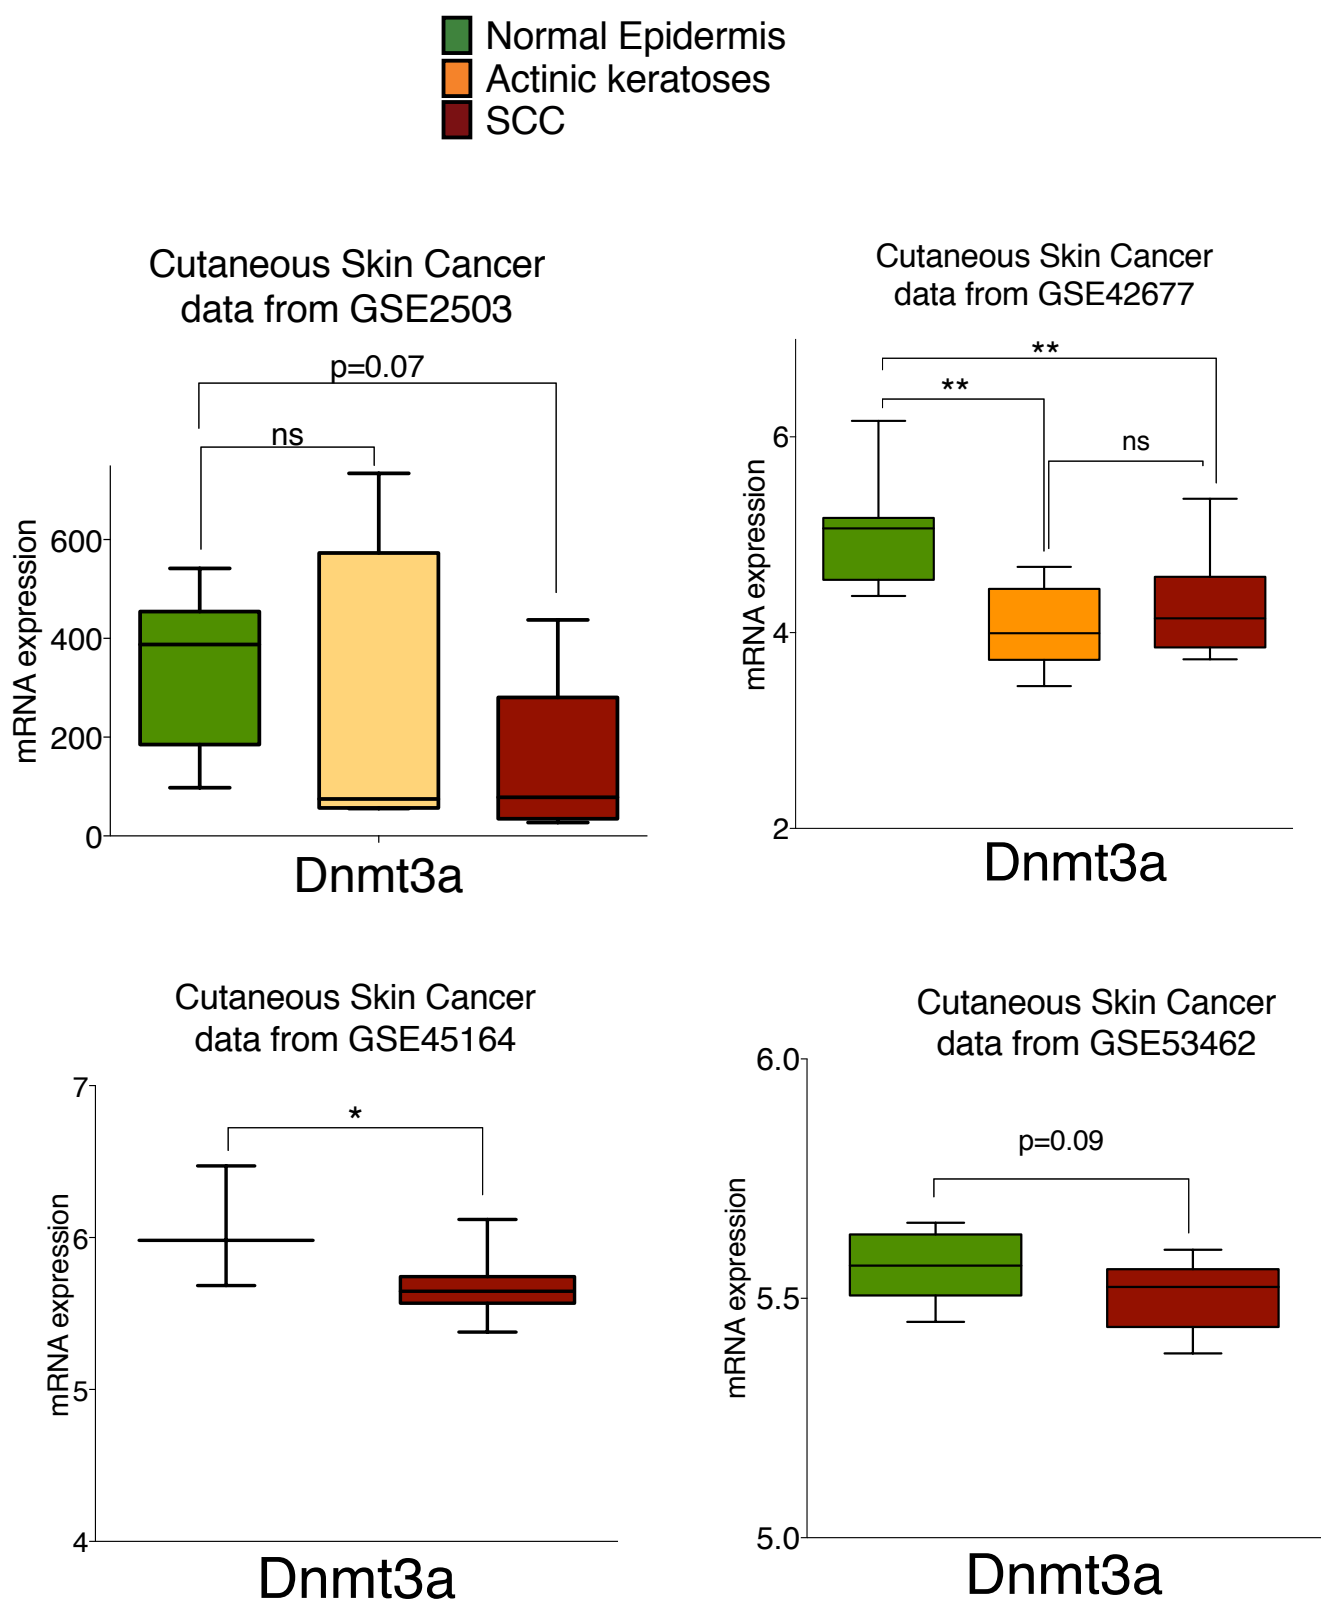

Supplement: supp [file elife-21697-supp-v1.zip]

Figure 2 Supplement 2

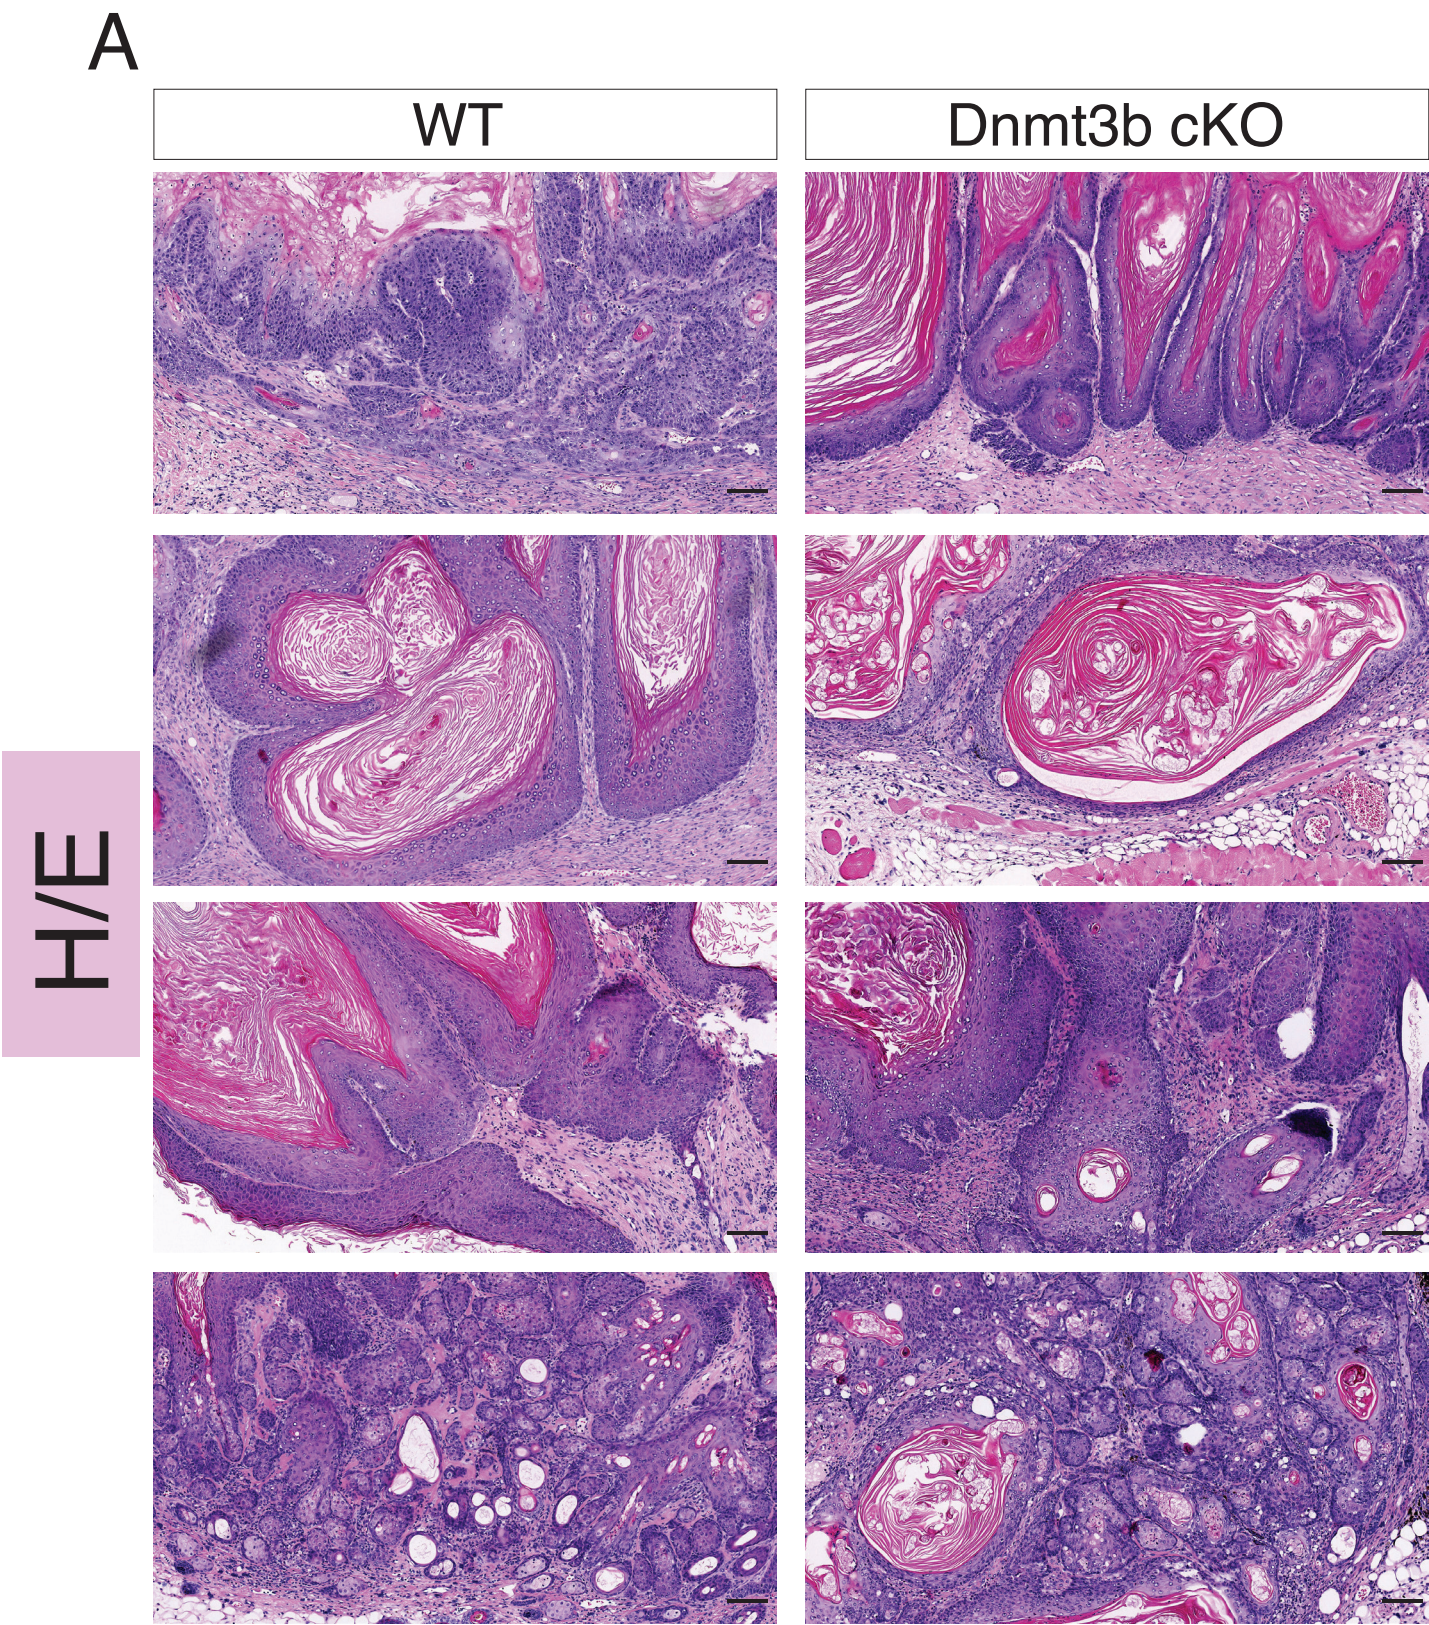

Supplement: supp [file elife-21697-supp-v1.zip]
